# Supplementary material
Source: publisher figshare collection journal article supplement (https://acs.figshare.com/ndownloader/files/3876247)
Supplement: Supplementary file 1 [file 3876247]

 
data_mo_C123_0m
 
_audit_creation_method            SHELXL-2012
_chemical_name_systematic
;
 ?
;
_chemical_name_common             ?
_chemical_melting_point           ?
_chemical_formula_moiety          ?
_chemical_formula_sum
 'C52 H76 Co N3 O3' 
_chemical_formula_weight          850.08
loop_
 _atom_type_symbol
 _atom_type_description
 _atom_type_scat_dispersion_real
 _atom_type_scat_dispersion_imag
 _atom_type_scat_source
 'C'  'C'   0.0033   0.0016
 'International Tables Vol C Tables 4.2.6.8 and 6.1.1.4'
 'H'  'H'   0.0000   0.0000
 'International Tables Vol C Tables 4.2.6.8 and 6.1.1.4'
 'N'  'N'   0.0061   0.0033
 'International Tables Vol C Tables 4.2.6.8 and 6.1.1.4'
 'O'  'O'   0.0106   0.0060
 'International Tables Vol C Tables 4.2.6.8 and 6.1.1.4'
 'Co'  'Co'   0.3494   0.9721
 'International Tables Vol C Tables 4.2.6.8 and 6.1.1.4'
 
_symmetry_cell_setting            Monoclinic 
_space_group_IT_number            14
_symmetry_space_group_name_H-M    P2(1)/c   
_space_group_name_Hall            '-P 2ybc'
 
_shelx_space_group_comment
;
The symmetry employed for this shelxl refinement is uniquely defined
by the following loop, which should always be used as a source of
symmetry information in preference to the above space-group names.
They are only intended as comments.
;
 
loop_
 _space_group_symop_operation_xyz
 'x, y, z'
 '-x, y+1/2, -z+1/2'
 '-x, -y, -z'
 'x, -y-1/2, z-1/2'
 
_cell_length_a                    18.261(6)
_cell_length_b                    15.916(5)
_cell_length_c                    18.739(6)
_cell_angle_alpha                 90
_cell_angle_beta                  115.374(8)
_cell_angle_gamma                 90
_cell_volume                      4921(3)
_cell_formula_units_Z             4
_cell_measurement_temperature     100(2)
_cell_measurement_reflns_used    1229
_cell_measurement_theta_min        2.18
_cell_measurement_theta_max       18.77
 
_exptl_crystal_description        square 
_exptl_crystal_colour             purple 
_exptl_crystal_density_meas       ? 
_exptl_crystal_density_method     ?              
_exptl_crystal_density_diffrn     1.147          
_exptl_crystal_F_000              1840
_exptl_transmission_factor_min    ?                                             
_exptl_transmission_factor_max    ?                                             
_exptl_crystal_size_max           0.10
_exptl_crystal_size_mid           0.10
_exptl_crystal_size_min           0.01
_exptl_absorpt_coefficient_mu     0.391
_shelx_estimated_absorpt_T_min    0.962
_shelx_estimated_absorpt_T_max    0.996
_exptl_absorpt_correction_type    empirical
_exptl_absorpt_correction_T_min   0.773
_exptl_absorpt_correction_T_max   0.996
_exptl_absorpt_process_details     
; 
 SADABS Version 2008/1 Bruker-Nonius
 Blessing, Acta Cryst. (1995) A51 33-38
; 
_exptl_special_details 
; 
 It should be noted that the esd's of the cell dimensions are probably too low;
 they should be multiplied by a factor of 2 to 10
; 
_diffrn_ambient_temperature       100(2)
_diffrn_measurement_specimen_support
                'magnetic support with MicroMount'
_diffrn_radiation_wavelength      0.71073 
_diffrn_radiation_type            MoK\a 
_diffrn_source                    'Microfocus source E025 IuS' 
_diffrn_source_type               'Bruker APEX DUO'
_diffrn_source_power              50
_diffrn_source_current            0.6
_diffrn_source_size               '0.2 mm x 0.2 mm fine focus'
_diffrn_radiation_monochromator   'Quazar MX Multilayer Optics' 
_diffrn_detector_type             '4K CCD area detector APEX II' 
_diffrn_measurement_device_type   'APEX DUO Kappa 4-axis goniometer' 
_diffrn_measurement_method         
;
 Fullsphere data collection, phi and omega scans
;
_diffrn_detector_area_resol_mean  512 
_diffrn_reflns_number             19956
_diffrn_reflns_av_unetI/netI      0.2717
_diffrn_reflns_av_R_equivalents   0.1359
_diffrn_reflns_limit_h_min        -21
_diffrn_reflns_limit_h_max        15
_diffrn_reflns_limit_k_min        -18
_diffrn_reflns_limit_k_max        14
_diffrn_reflns_limit_l_min        -15
_diffrn_reflns_limit_l_max        21
_diffrn_reflns_theta_min          1.756
_diffrn_reflns_theta_max          24.666
_diffrn_reflns_theta_full         24.666
_diffrn_measured_fraction_theta_max   0.995
_diffrn_measured_fraction_theta_full  0.995
_diffrn_reflns_Laue_measured_fraction_max    0.995
_diffrn_reflns_Laue_measured_fraction_full   0.995
_diffrn_reflns_point_group_measured_fraction_max   0.995
_diffrn_reflns_point_group_measured_fraction_full  0.995
_reflns_number_total              8300
_reflns_number_gt                 3416
_reflns_threshold_expression      >2sigma(I)
_reflns_Friedel_coverage          0.000
_reflns_Friedel_fraction_max      .
_reflns_Friedel_fraction_full     .

_reflns_special_details
;
 Reflections were merged by SHELXL according to the crystal
 class for the calculation of statistics and refinement.

 _reflns_Friedel_fraction is defined as the number of unique
 Friedel pairs measured divided by the number that would be
 possible theoretically, ignoring centric projections and
 systematic absences.
;

_computing_data_collection        'Bruker APEX2 v2011.4-0' 
_computing_cell_refinement        'Bruker APEX2 v2011.4-0' 
_computing_data_reduction         'Bruker SAINT V7.60A' 
_computing_structure_solution     'Sir2011' 
_computing_structure_refinement   'SHELXL-2012 (Sheldrick, 2012)' 
_computing_molecular_graphics     'Bruker SHELXTL' 
_computing_publication_material   'Bruker SHELXTL' 
 
_refine_special_details
;
 ?
;
_refine_ls_structure_factor_coef  Fsqd
_refine_ls_matrix_type            full
_refine_ls_weighting_scheme       calc
_refine_ls_weighting_details
;
 w=1/[\s^2^(Fo^2^)+(0.0818P)^2^]
 where P=(Fo^2^+2Fc^2^)/3
;
_atom_sites_solution_primary      ?
_atom_sites_solution_secondary    ?
_atom_sites_solution_hydrogens    geom
_refine_ls_hydrogen_treatment     constr
_refine_ls_extinction_method      none
_refine_ls_extinction_coef        .
_refine_ls_number_reflns          8300
_refine_ls_number_parameters      552
_refine_ls_number_restraints      0
_refine_ls_R_factor_all           0.2301
_refine_ls_R_factor_gt            0.0720
_refine_ls_wR_factor_ref          0.2112
_refine_ls_wR_factor_gt           0.1362
_refine_ls_goodness_of_fit_ref    0.964
_refine_ls_restrained_S_all       0.964
_refine_ls_shift/su_max           0.000
_refine_ls_shift/su_mean          0.000
 
loop_
 _atom_site_label
 _atom_site_type_symbol
 _atom_site_fract_x
 _atom_site_fract_y
 _atom_site_fract_z
 _atom_site_U_iso_or_equiv
 _atom_site_adp_type
 _atom_site_occupancy
 _atom_site_site_symmetry_order  
 _atom_site_calc_flag
 _atom_site_refinement_flags_posn
 _atom_site_refinement_flags_adp
 _atom_site_refinement_flags_occupancy
 _atom_site_disorder_assembly
 _atom_site_disorder_group
Co1 Co 0.69926(6) 0.98588(5) 0.76788(5) 0.0212(3) Uani 1 1 d . . . . .
N1 N 0.7185(3) 0.9270(3) 0.8653(3) 0.0148(13) Uani 1 1 d . . . . .
N2 N 0.6793(4) 1.0429(3) 0.6667(3) 0.0237(14) Uani 1 1 d . . . . .
N3 N 0.6474(4) 1.1495(4) 0.4499(4) 0.0364(17) Uani 1 1 d . . . . .
O1 O 0.7473(3) 0.8997(2) 0.7336(2) 0.0228(12) Uani 1 1 d . . . . .
O2 O 0.5866(3) 0.9933(2) 0.7394(2) 0.0195(11) Uani 1 1 d . . . . .
O3 O 0.7668(3) 1.0770(2) 0.8225(3) 0.0222(12) Uani 1 1 d . . . . .
C1 C 0.7987(4) 0.8833(4) 0.8967(4) 0.0178(16) Uani 1 1 d . . . . .
H1A H 0.8123 0.8634 0.9510 0.021 Uiso 1 1 calc R U . . .
H1B H 0.8410 0.9239 0.8996 0.021 Uiso 1 1 calc R U . . .
C2 C 0.6504(4) 0.8633(4) 0.8453(4) 0.0193(17) Uani 1 1 d . . . . .
H2A H 0.6427 0.8333 0.7963 0.023 Uiso 1 1 calc R U . . .
H2B H 0.6662 0.8214 0.8883 0.023 Uiso 1 1 calc R U . . .
C3 C 0.7175(4) 0.9886(4) 0.9255(4) 0.0160(15) Uani 1 1 d . . . . .
H3A H 0.6670 1.0220 0.9018 0.019 Uiso 1 1 calc R U . . .
H3B H 0.7167 0.9571 0.9707 0.019 Uiso 1 1 calc R U . . .
C4 C 0.7993(4) 0.8095(4) 0.8464(4) 0.0185(16) Uani 1 1 d . . . . .
C5 C 0.7740(4) 0.8228(4) 0.7656(4) 0.0168(16) Uani 1 1 d . . . . .
C6 C 0.7792(4) 0.7565(4) 0.7172(4) 0.0196(17) Uani 1 1 d . . . . .
C7 C 0.8087(4) 0.6800(4) 0.7539(4) 0.0256(18) Uani 1 1 d . . . . .
H7 H 0.8134 0.6352 0.7226 0.031 Uiso 1 1 calc R U . . .
C8 C 0.8322(4) 0.6648(4) 0.8349(4) 0.0190(16) Uani 1 1 d . . . . .
C9 C 0.8264(4) 0.7300(4) 0.8800(4) 0.0193(16) Uani 1 1 d . . . . .
H9 H 0.8408 0.7214 0.9346 0.023 Uiso 1 1 calc R U . . .
C10 C 0.7490(5) 0.7689(4) 0.6273(4) 0.0261(19) Uani 1 1 d . . . . .
C11 C 0.6595(5) 0.7947(4) 0.5889(4) 0.034(2) Uani 1 1 d . . . . .
H11A H 0.6527 0.8475 0.6122 0.051 Uiso 1 1 calc R U . . .
H11B H 0.6268 0.7507 0.5980 0.051 Uiso 1 1 calc R U . . .
H11C H 0.6417 0.8022 0.5320 0.051 Uiso 1 1 calc R U . . .
C12 C 0.8001(5) 0.8357(4) 0.6106(4) 0.037(2) Uani 1 1 d . . . . .
H12A H 0.8002 0.8875 0.6389 0.055 Uiso 1 1 calc R U . . .
H12B H 0.7769 0.8471 0.5537 0.055 Uiso 1 1 calc R U . . .
H12C H 0.8558 0.8153 0.6284 0.055 Uiso 1 1 calc R U . . .
C13 C 0.7558(5) 0.6861(4) 0.5864(4) 0.047(2) Uani 1 1 d . . . . .
H13A H 0.7354 0.6956 0.5294 0.070 Uiso 1 1 calc R U . . .
H13B H 0.7235 0.6421 0.5960 0.070 Uiso 1 1 calc R U . . .
H13C H 0.8126 0.6685 0.6079 0.070 Uiso 1 1 calc R U . . .
C14 C 0.8661(5) 0.5773(4) 0.8705(4) 0.0292(19) Uani 1 1 d . . . . .
C15 C 0.9518(5) 0.5672(4) 0.8755(5) 0.037(2) Uani 1 1 d . . . . .
H15A H 0.9499 0.5735 0.8227 0.056 Uiso 1 1 calc R U . . .
H15B H 0.9729 0.5114 0.8964 0.056 Uiso 1 1 calc R U . . .
H15C H 0.9874 0.6104 0.9106 0.056 Uiso 1 1 calc R U . . .
C16 C 0.8108(4) 0.5058(4) 0.8188(4) 0.0312(19) Uani 1 1 d . . . . .
H16A H 0.7562 0.5121 0.8160 0.047 Uiso 1 1 calc R U . . .
H16B H 0.8332 0.4513 0.8423 0.047 Uiso 1 1 calc R U . . .
H16C H 0.8080 0.5090 0.7655 0.047 Uiso 1 1 calc R U . . .
C17 C 0.8697(5) 0.5664(4) 0.9541(4) 0.037(2) Uani 1 1 d . . . . .
H17A H 0.9089 0.6062 0.9904 0.056 Uiso 1 1 calc R U . . .
H17B H 0.8866 0.5089 0.9725 0.056 Uiso 1 1 calc R U . . .
H17C H 0.8161 0.5771 0.9521 0.056 Uiso 1 1 calc R U . . .
C18 C 0.5724(4) 0.9027(4) 0.8341(4) 0.0188(16) Uani 1 1 d . . . . .
C19 C 0.5458(4) 0.9730(4) 0.7829(4) 0.0164(16) Uani 1 1 d . . . . .
C20 C 0.4789(4) 1.0193(4) 0.7794(4) 0.0195(16) Uani 1 1 d . . . . .
C21 C 0.4369(4) 0.9866(4) 0.8205(4) 0.0243(17) Uani 1 1 d . . . . .
H21 H 0.3892 1.0152 0.8152 0.029 Uiso 1 1 calc R U . . .
C22 C 0.4589(4) 0.9160(4) 0.8681(4) 0.0195(16) Uani 1 1 d . . . . .
C23 C 0.5297(4) 0.8756(4) 0.8758(4) 0.0203(17) Uani 1 1 d . . . . .
H23 H 0.5491 0.8288 0.9103 0.024 Uiso 1 1 calc R U . . .
C24 C 0.4550(5) 1.1028(4) 0.7339(4) 0.0292(19) Uani 1 1 d . . . . .
C25 C 0.5292(5) 1.1590(4) 0.7537(5) 0.041(2) Uani 1 1 d . . . . .
H25A H 0.5608 1.1615 0.8112 0.061 Uiso 1 1 calc R U . . .
H25B H 0.5114 1.2158 0.7333 0.061 Uiso 1 1 calc R U . . .
H25C H 0.5628 1.1359 0.7294 0.061 Uiso 1 1 calc R U . . .
C26 C 0.4119(5) 1.0865(5) 0.6443(5) 0.049(2) Uani 1 1 d . . . . .
H26A H 0.4503 1.0614 0.6265 0.073 Uiso 1 1 calc R U . . .
H26B H 0.3917 1.1397 0.6165 0.073 Uiso 1 1 calc R U . . .
H26C H 0.3664 1.0479 0.6328 0.073 Uiso 1 1 calc R U . . .
C27 C 0.3956(5) 1.1522(5) 0.7582(5) 0.049(3) Uani 1 1 d . . . . .
H27A H 0.3453 1.1202 0.7428 0.074 Uiso 1 1 calc R U . . .
H27B H 0.3835 1.2069 0.7317 0.074 Uiso 1 1 calc R U . . .
H27C H 0.4207 1.1606 0.8156 0.074 Uiso 1 1 calc R U . . .
C28 C 0.4071(4) 0.8810(4) 0.9078(4) 0.0221(17) Uani 1 1 d . . . . .
C29 C 0.4559(5) 0.8291(6) 0.9804(5) 0.064(3) Uani 1 1 d . . . . .
H29A H 0.4985 0.8641 1.0193 0.095 Uiso 1 1 calc R U . . .
H29B H 0.4807 0.7816 0.9657 0.095 Uiso 1 1 calc R U . . .
H29C H 0.4202 0.8081 1.0033 0.095 Uiso 1 1 calc R U . . .
C30 C 0.3411(5) 0.8268(5) 0.8496(5) 0.056(3) Uani 1 1 d . . . . .
H30A H 0.3048 0.8084 0.8729 0.083 Uiso 1 1 calc R U . . .
H30B H 0.3652 0.7775 0.8367 0.083 Uiso 1 1 calc R U . . .
H30C H 0.3102 0.8590 0.8015 0.083 Uiso 1 1 calc R U . . .
C31 C 0.3678(6) 0.9512(5) 0.9341(5) 0.056(3) Uani 1 1 d . . . . .
H31A H 0.3279 0.9804 0.8876 0.084 Uiso 1 1 calc R U . . .
H31B H 0.4094 0.9911 0.9670 0.084 Uiso 1 1 calc R U . . .
H31C H 0.3406 0.9275 0.9646 0.084 Uiso 1 1 calc R U . . .
C32 C 0.7883(4) 1.0472(4) 0.9554(4) 0.0176(16) Uani 1 1 d . . . . .
C33 C 0.8079(4) 1.0906(4) 0.9007(4) 0.0201(17) Uani 1 1 d . . . . .
C34 C 0.8728(4) 1.1503(4) 0.9295(4) 0.0210(17) Uani 1 1 d . . . . .
C35 C 0.9133(4) 1.1612(4) 1.0111(4) 0.0199(17) Uani 1 1 d . . . . .
H35 H 0.9563 1.2009 1.0306 0.024 Uiso 1 1 calc R U . . .
C36 C 0.8949(4) 1.1174(4) 1.0661(4) 0.0180(16) Uani 1 1 d . . . . .
C37 C 0.8320(4) 1.0604(4) 1.0360(4) 0.0175(16) Uani 1 1 d . . . . .
H37 H 0.8182 1.0291 1.0717 0.021 Uiso 1 1 calc R U . . .
C38 C 0.8990(5) 1.1968(4) 0.8727(4) 0.0291(19) Uani 1 1 d . . . . .
C39 C 0.8282(5) 1.2440(4) 0.8090(4) 0.034(2) Uani 1 1 d . . . . .
H39A H 0.7834 1.2050 0.7817 0.052 Uiso 1 1 calc R U . . .
H39B H 0.8458 1.2686 0.7710 0.052 Uiso 1 1 calc R U . . .
H39C H 0.8101 1.2888 0.8336 0.052 Uiso 1 1 calc R U . . .
C40 C 0.9360(5) 1.1316(4) 0.8363(4) 0.036(2) Uani 1 1 d . . . . .
H40A H 0.9855 1.1081 0.8779 0.055 Uiso 1 1 calc R U . . .
H40B H 0.9491 1.1591 0.7964 0.055 Uiso 1 1 calc R U . . .
H40C H 0.8969 1.0864 0.8115 0.055 Uiso 1 1 calc R U . . .
C41 C 0.9644(5) 1.2635(5) 0.9156(4) 0.045(2) Uani 1 1 d . . . . .
H41A H 0.9444 1.3027 0.9435 0.067 Uiso 1 1 calc R U . . .
H41B H 0.9768 1.2944 0.8768 0.067 Uiso 1 1 calc R U . . .
H41C H 1.0136 1.2358 0.9536 0.067 Uiso 1 1 calc R U . . .
C42 C 0.9464(4) 1.1315(4) 1.1549(4) 0.0227(18) Uani 1 1 d . . . . .
C43 C 0.9147(5) 1.0818(4) 1.2050(4) 0.039(2) Uani 1 1 d . . . . .
H43A H 0.9474 1.0947 1.2609 0.058 Uiso 1 1 calc R U . . .
H43B H 0.9182 1.0216 1.1960 0.058 Uiso 1 1 calc R U . . .
H43C H 0.8581 1.0971 1.1904 0.058 Uiso 1 1 calc R U . . .
C44 C 0.9475(6) 1.2240(4) 1.1754(5) 0.049(3) Uani 1 1 d . . . . .
H44A H 0.9738 1.2562 1.1483 0.074 Uiso 1 1 calc R U . . .
H44B H 0.9776 1.2314 1.2326 0.074 Uiso 1 1 calc R U . . .
H44C H 0.8918 1.2440 1.1584 0.074 Uiso 1 1 calc R U . . .
C45 C 1.0333(5) 1.1025(5) 1.1759(5) 0.051(2) Uani 1 1 d . . . . .
H45A H 1.0559 1.1358 1.1461 0.076 Uiso 1 1 calc R U . . .
H45B H 1.0329 1.0430 1.1624 0.076 Uiso 1 1 calc R U . . .
H45C H 1.0666 1.1102 1.2326 0.076 Uiso 1 1 calc R U . . .
C46 C 0.7418(5) 1.0722(4) 0.6544(4) 0.034(2) Uani 1 1 d . . . . .
H46 H 0.7945 1.0682 0.6965 0.041 Uiso 1 1 calc R U . . .
C47 C 0.7344(5) 1.1079(4) 0.5847(5) 0.035(2) Uani 1 1 d . . . . .
H47 H 0.7812 1.1281 0.5803 0.041 Uiso 1 1 calc R U . . .
C48 C 0.6583(5) 1.1144(4) 0.5202(4) 0.0272(19) Uani 1 1 d . . . . .
C49 C 0.5924(5) 1.0816(4) 0.5328(4) 0.0315(19) Uani 1 1 d . . . . .
H49 H 0.5391 1.0822 0.4914 0.038 Uiso 1 1 calc R U . . .
C50 C 0.6068(5) 1.0490(4) 0.6055(4) 0.0262(18) Uani 1 1 d . . . . .
H50 H 0.5614 1.0291 0.6127 0.031 Uiso 1 1 calc R U . . .
C51 C 0.5677(5) 1.1506(4) 0.3838(4) 0.044(2) Uani 1 1 d . . . . .
H51A H 0.5417 1.0958 0.3794 0.065 Uiso 1 1 calc R U . . .
H51B H 0.5731 1.1626 0.3349 0.065 Uiso 1 1 calc R U . . .
H51C H 0.5345 1.1943 0.3924 0.065 Uiso 1 1 calc R U . . .
C52 C 0.7154(5) 1.1875(5) 0.4409(5) 0.057(3) Uani 1 1 d . . . . .
H52A H 0.7392 1.2318 0.4806 0.086 Uiso 1 1 calc R U . . .
H52B H 0.6965 1.2119 0.3879 0.086 Uiso 1 1 calc R U . . .
H52C H 0.7564 1.1445 0.4481 0.086 Uiso 1 1 calc R U . . .
 
loop_
 _atom_site_aniso_label
 _atom_site_aniso_U_11
 _atom_site_aniso_U_22
 _atom_site_aniso_U_33
 _atom_site_aniso_U_23
 _atom_site_aniso_U_13
 _atom_site_aniso_U_12
Co1 0.0286(6) 0.0190(5) 0.0171(5) 0.0012(4) 0.0108(4) -0.0010(5)
N1 0.015(3) 0.017(3) 0.010(3) -0.002(2) 0.003(3) -0.005(3)
N2 0.029(4) 0.028(3) 0.019(4) 0.004(3) 0.014(3) -0.003(3)
N3 0.045(5) 0.039(4) 0.023(4) 0.012(3) 0.012(4) -0.001(3)
O1 0.033(3) 0.022(3) 0.016(3) 0.006(2) 0.012(2) 0.007(2)
O2 0.023(3) 0.016(2) 0.019(3) 0.005(2) 0.008(2) 0.006(2)
O3 0.034(3) 0.014(2) 0.017(3) 0.000(2) 0.008(2) -0.013(2)
C1 0.022(5) 0.019(4) 0.011(4) -0.001(3) 0.006(3) 0.000(3)
C2 0.025(5) 0.018(4) 0.015(4) 0.001(3) 0.008(4) -0.002(4)
C3 0.019(4) 0.013(3) 0.019(4) 0.005(3) 0.011(3) 0.002(3)
C4 0.018(4) 0.026(4) 0.011(4) 0.002(3) 0.006(3) -0.002(3)
C5 0.013(4) 0.015(4) 0.022(4) 0.006(3) 0.006(3) -0.005(3)
C6 0.020(5) 0.023(4) 0.014(4) -0.008(3) 0.005(4) -0.004(3)
C7 0.035(5) 0.019(4) 0.029(5) -0.008(3) 0.020(4) -0.003(4)
C8 0.017(4) 0.022(4) 0.016(4) -0.006(3) 0.005(3) -0.002(3)
C9 0.020(4) 0.023(4) 0.015(4) 0.000(3) 0.007(3) -0.001(3)
C10 0.042(5) 0.025(4) 0.011(4) -0.007(3) 0.011(4) -0.007(4)
C11 0.041(6) 0.042(5) 0.016(4) 0.004(3) 0.009(4) -0.006(4)
C12 0.052(6) 0.041(5) 0.028(5) -0.001(4) 0.028(5) -0.004(4)
C13 0.082(7) 0.041(5) 0.016(5) -0.007(4) 0.019(5) 0.005(5)
C14 0.039(5) 0.019(4) 0.027(5) -0.004(3) 0.013(4) -0.003(4)
C15 0.040(6) 0.024(4) 0.045(6) -0.002(4) 0.015(5) 0.002(4)
C16 0.041(5) 0.020(4) 0.033(5) -0.003(3) 0.017(4) 0.001(4)
C17 0.056(6) 0.020(4) 0.030(5) 0.002(3) 0.012(5) 0.004(4)
C18 0.017(4) 0.020(4) 0.018(4) -0.002(3) 0.006(3) 0.004(3)
C19 0.021(4) 0.015(4) 0.012(4) 0.001(3) 0.006(3) 0.000(3)
C20 0.022(4) 0.015(3) 0.019(4) -0.002(3) 0.006(3) 0.006(4)
C21 0.024(4) 0.028(4) 0.022(4) 0.001(3) 0.012(4) 0.003(4)
C22 0.016(4) 0.022(4) 0.015(4) -0.001(3) 0.002(3) 0.000(4)
C23 0.026(5) 0.017(4) 0.019(4) 0.003(3) 0.010(4) -0.001(4)
C24 0.038(5) 0.019(4) 0.036(5) 0.008(3) 0.020(4) 0.005(4)
C25 0.056(6) 0.023(4) 0.047(6) 0.015(4) 0.026(5) 0.008(4)
C26 0.062(7) 0.038(5) 0.039(6) 0.017(4) 0.015(5) 0.016(5)
C27 0.058(7) 0.032(5) 0.072(7) 0.025(4) 0.040(6) 0.025(5)
C28 0.020(4) 0.023(4) 0.025(4) 0.000(3) 0.011(4) -0.002(4)
C29 0.045(6) 0.095(7) 0.066(7) 0.046(6) 0.038(6) 0.018(6)
C30 0.055(7) 0.067(6) 0.059(7) -0.018(5) 0.039(6) -0.028(5)
C31 0.077(7) 0.041(5) 0.081(7) 0.008(5) 0.062(6) 0.004(5)
C32 0.020(4) 0.013(3) 0.020(4) -0.003(3) 0.010(4) 0.001(3)
C33 0.024(5) 0.019(4) 0.012(4) 0.001(3) 0.003(4) -0.004(4)
C34 0.028(5) 0.020(4) 0.017(4) -0.005(3) 0.011(4) -0.013(4)
C35 0.024(5) 0.013(4) 0.023(4) -0.004(3) 0.010(4) -0.007(3)
C36 0.017(4) 0.018(4) 0.018(4) -0.003(3) 0.007(4) -0.003(3)
C37 0.021(4) 0.019(4) 0.014(4) 0.000(3) 0.008(4) 0.002(4)
C38 0.040(5) 0.026(4) 0.024(5) 0.003(3) 0.016(4) -0.010(4)
C39 0.057(6) 0.025(4) 0.032(5) 0.007(4) 0.029(5) -0.005(4)
C40 0.039(6) 0.043(5) 0.033(5) 0.005(4) 0.021(4) -0.005(4)
C41 0.056(6) 0.045(5) 0.035(5) 0.006(4) 0.021(5) -0.021(5)
C42 0.029(5) 0.024(4) 0.017(4) -0.008(3) 0.011(4) -0.007(4)
C43 0.049(6) 0.047(5) 0.017(4) -0.004(4) 0.012(4) -0.013(4)
C44 0.098(8) 0.024(4) 0.034(5) -0.008(4) 0.036(5) -0.015(5)
C45 0.037(6) 0.074(6) 0.036(6) -0.012(5) 0.011(5) 0.000(5)
C46 0.034(5) 0.050(5) 0.022(5) 0.009(4) 0.014(4) 0.004(4)
C47 0.033(5) 0.041(5) 0.033(5) 0.012(4) 0.017(5) -0.005(4)
C48 0.045(6) 0.022(4) 0.015(4) 0.004(3) 0.013(4) -0.004(4)
C49 0.036(5) 0.030(4) 0.021(4) 0.002(3) 0.004(4) -0.006(4)
C50 0.030(5) 0.026(4) 0.017(4) 0.001(3) 0.004(4) -0.006(4)
C51 0.074(7) 0.030(4) 0.024(5) 0.004(4) 0.019(5) -0.009(5)
C52 0.057(7) 0.072(6) 0.057(7) 0.029(5) 0.038(6) -0.010(5)
 
_geom_special_details
;
 All esds (except the esd in the dihedral angle between two l.s. planes)
 are estimated using the full covariance matrix.  The cell esds are taken
 into account individually in the estimation of esds in distances, angles
 and torsion angles; correlations between esds in cell parameters are only
 used when they are defined by crystal symmetry.  An approximate (isotropic)
 treatment of cell esds is used for estimating esds involving l.s. planes.
;
 
loop_
 _geom_bond_atom_site_label_1
 _geom_bond_atom_site_label_2
 _geom_bond_distance
 _geom_bond_site_symmetry_2
 _geom_bond_publ_flag
Co1 O1 1.883(4) . ?
Co1 O3 1.895(4) . ?
Co1 O2 1.895(4) . ?
Co1 N1 1.945(5) . ?
Co1 N2 1.990(5) . ?
N1 C1 1.495(8) . ?
N1 C3 1.501(7) . ?
N1 C2 1.522(8) . ?
N2 C50 1.331(8) . ?
N2 C46 1.342(8) . ?
N3 C48 1.365(8) . ?
N3 C51 1.453(10) . ?
N3 C52 1.454(9) . ?
O1 C5 1.358(7) . ?
O2 C19 1.358(7) . ?
O3 C33 1.348(7) . ?
C1 C4 1.509(8) . ?
C2 C18 1.487(8) . ?
C3 C32 1.495(9) . ?
C4 C5 1.396(8) . ?
C4 C9 1.406(8) . ?
C5 C6 1.421(8) . ?
C6 C7 1.389(9) . ?
C6 C10 1.544(8) . ?
C7 C8 1.410(8) . ?
C8 C9 1.371(8) . ?
C8 C14 1.554(9) . ?
C10 C11 1.533(10) . ?
C10 C12 1.533(9) . ?
C10 C13 1.556(9) . ?
C14 C15 1.537(10) . ?
C14 C17 1.548(9) . ?
C14 C16 1.554(9) . ?
C18 C23 1.387(8) . ?
C18 C19 1.418(8) . ?
C19 C20 1.403(8) . ?
C20 C21 1.399(8) . ?
C20 C24 1.537(9) . ?
C21 C22 1.383(8) . ?
C22 C23 1.395(9) . ?
C22 C28 1.537(9) . ?
C24 C25 1.531(10) . ?
C24 C26 1.541(10) . ?
C24 C27 1.558(9) . ?
C28 C30 1.503(10) . ?
C28 C29 1.512(10) . ?
C28 C31 1.520(9) . ?
C32 C37 1.389(8) . ?
C32 C33 1.403(8) . ?
C33 C34 1.432(9) . ?
C34 C35 1.395(9) . ?
C34 C38 1.531(9) . ?
C35 C36 1.399(8) . ?
C36 C37 1.380(9) . ?
C36 C42 1.538(9) . ?
C38 C39 1.529(10) . ?
C38 C41 1.541(10) . ?
C38 C40 1.549(9) . ?
C42 C43 1.518(9) . ?
C42 C44 1.518(8) . ?
C42 C45 1.534(10) . ?
C46 C47 1.376(9) . ?
C47 C48 1.402(10) . ?
C48 C49 1.420(10) . ?
C49 C50 1.375(9) . ?
 
loop_
 _geom_angle_atom_site_label_1
 _geom_angle_atom_site_label_2
 _geom_angle_atom_site_label_3
 _geom_angle
 _geom_angle_site_symmetry_1
 _geom_angle_site_symmetry_3
 _geom_angle_publ_flag
O1 Co1 O3 116.8(2) . . ?
O1 Co1 O2 123.89(19) . . ?
O3 Co1 O2 118.76(18) . . ?
O1 Co1 N1 92.6(2) . . ?
O3 Co1 N1 92.75(19) . . ?
O2 Co1 N1 91.8(2) . . ?
O1 Co1 N2 85.9(2) . . ?
O3 Co1 N2 88.7(2) . . ?
O2 Co1 N2 88.3(2) . . ?
N1 Co1 N2 178.3(2) . . ?
C1 N1 C3 109.4(5) . . ?
C1 N1 C2 110.2(4) . . ?
C3 N1 C2 110.4(5) . . ?
C1 N1 Co1 110.3(4) . . ?
C3 N1 Co1 109.6(3) . . ?
C2 N1 Co1 106.9(4) . . ?
C50 N2 C46 115.5(6) . . ?
C50 N2 Co1 124.2(5) . . ?
C46 N2 Co1 120.0(5) . . ?
C48 N3 C51 120.4(6) . . ?
C48 N3 C52 120.3(7) . . ?
C51 N3 C52 119.3(6) . . ?
C5 O1 Co1 129.6(4) . . ?
C19 O2 Co1 128.7(4) . . ?
C33 O3 Co1 129.8(4) . . ?
N1 C1 C4 112.5(5) . . ?
C18 C2 N1 112.7(5) . . ?
C32 C3 N1 113.7(5) . . ?
C5 C4 C9 120.8(6) . . ?
C5 C4 C1 118.2(5) . . ?
C9 C4 C1 121.0(6) . . ?
O1 C5 C4 120.3(6) . . ?
O1 C5 C6 119.8(6) . . ?
C4 C5 C6 119.9(6) . . ?
C7 C6 C5 117.0(6) . . ?
C7 C6 C10 122.2(6) . . ?
C5 C6 C10 120.7(6) . . ?
C6 C7 C8 123.8(6) . . ?
C9 C8 C7 117.8(6) . . ?
C9 C8 C14 122.3(6) . . ?
C7 C8 C14 119.8(6) . . ?
C8 C9 C4 120.7(6) . . ?
C11 C10 C12 109.8(6) . . ?
C11 C10 C6 110.9(5) . . ?
C12 C10 C6 110.4(6) . . ?
C11 C10 C13 106.8(6) . . ?
C12 C10 C13 107.6(6) . . ?
C6 C10 C13 111.3(5) . . ?
C15 C14 C17 109.0(6) . . ?
C15 C14 C8 109.1(6) . . ?
C17 C14 C8 111.9(5) . . ?
C15 C14 C16 109.6(6) . . ?
C17 C14 C16 106.4(5) . . ?
C8 C14 C16 110.8(6) . . ?
C23 C18 C19 121.0(6) . . ?
C23 C18 C2 121.7(6) . . ?
C19 C18 C2 117.2(6) . . ?
O2 C19 C20 122.5(5) . . ?
O2 C19 C18 118.5(5) . . ?
C20 C19 C18 119.0(6) . . ?
C21 C20 C19 116.7(6) . . ?
C21 C20 C24 122.3(6) . . ?
C19 C20 C24 120.9(6) . . ?
C22 C21 C20 125.6(6) . . ?
C21 C22 C23 116.2(6) . . ?
C21 C22 C28 122.5(6) . . ?
C23 C22 C28 121.3(6) . . ?
C18 C23 C22 121.2(6) . . ?
C25 C24 C20 111.0(6) . . ?
C25 C24 C26 110.4(6) . . ?
C20 C24 C26 110.5(5) . . ?
C25 C24 C27 106.7(6) . . ?
C20 C24 C27 110.0(5) . . ?
C26 C24 C27 108.1(7) . . ?
C30 C28 C29 108.6(6) . . ?
C30 C28 C31 108.3(7) . . ?
C29 C28 C31 106.7(6) . . ?
C30 C28 C22 109.0(6) . . ?
C29 C28 C22 112.6(6) . . ?
C31 C28 C22 111.4(5) . . ?
C37 C32 C33 120.8(6) . . ?
C37 C32 C3 120.2(6) . . ?
C33 C32 C3 118.9(6) . . ?
O3 C33 C32 121.2(6) . . ?
O3 C33 C34 120.1(6) . . ?
C32 C33 C34 118.7(6) . . ?
C35 C34 C33 117.4(6) . . ?
C35 C34 C38 121.7(6) . . ?
C33 C34 C38 120.9(6) . . ?
C34 C35 C36 124.3(6) . . ?
C37 C36 C35 116.6(6) . . ?
C37 C36 C42 123.6(6) . . ?
C35 C36 C42 119.7(6) . . ?
C36 C37 C32 122.2(6) . . ?
C39 C38 C34 111.7(6) . . ?
C39 C38 C41 106.0(5) . . ?
C34 C38 C41 112.0(6) . . ?
C39 C38 C40 111.6(6) . . ?
C34 C38 C40 107.9(5) . . ?
C41 C38 C40 107.6(6) . . ?
C43 C42 C44 108.5(5) . . ?
C43 C42 C45 108.1(6) . . ?
C44 C42 C45 109.1(6) . . ?
C43 C42 C36 112.0(6) . . ?
C44 C42 C36 110.6(6) . . ?
C45 C42 C36 108.6(5) . . ?
N2 C46 C47 124.2(7) . . ?
C46 C47 C48 120.4(7) . . ?
N3 C48 C47 122.9(7) . . ?
N3 C48 C49 121.9(7) . . ?
C47 C48 C49 115.3(6) . . ?
C50 C49 C48 119.2(7) . . ?
N2 C50 C49 125.4(7) . . ?
 
loop_
 _geom_torsion_atom_site_label_1
 _geom_torsion_atom_site_label_2
 _geom_torsion_atom_site_label_3
 _geom_torsion_atom_site_label_4
 _geom_torsion
 _geom_torsion_site_symmetry_1
 _geom_torsion_site_symmetry_2
 _geom_torsion_site_symmetry_3
 _geom_torsion_site_symmetry_4
 _geom_torsion_publ_flag
O3 Co1 O1 C5 101.4(5) . . . . ?
O2 Co1 O1 C5 -87.0(5) . . . . ?
N1 Co1 O1 C5 7.0(5) . . . . ?
N2 Co1 O1 C5 -172.2(5) . . . . ?
O1 Co1 O2 C19 102.3(5) . . . . ?
O3 Co1 O2 C19 -86.2(5) . . . . ?
N1 Co1 O2 C19 7.9(5) . . . . ?
N2 Co1 O2 C19 -173.8(5) . . . . ?
O1 Co1 O3 C33 -96.4(5) . . . . ?
O2 Co1 O3 C33 91.6(5) . . . . ?
N1 Co1 O3 C33 -2.0(5) . . . . ?
N2 Co1 O3 C33 178.9(5) . . . . ?
C3 N1 C1 C4 169.5(5) . . . . ?
C2 N1 C1 C4 47.9(6) . . . . ?
Co1 N1 C1 C4 -69.9(5) . . . . ?
C1 N1 C2 C18 164.8(5) . . . . ?
C3 N1 C2 C18 43.8(7) . . . . ?
Co1 N1 C2 C18 -75.3(5) . . . . ?
C1 N1 C3 C32 51.7(6) . . . . ?
C2 N1 C3 C32 173.2(5) . . . . ?
Co1 N1 C3 C32 -69.3(6) . . . . ?
N1 C1 C4 C5 52.8(8) . . . . ?
N1 C1 C4 C9 -128.7(6) . . . . ?
Co1 O1 C5 C4 -26.6(9) . . . . ?
Co1 O1 C5 C6 155.9(5) . . . . ?
C9 C4 C5 O1 179.5(6) . . . . ?
C1 C4 C5 O1 -2.1(9) . . . . ?
C9 C4 C5 C6 -3.0(10) . . . . ?
C1 C4 C5 C6 175.4(6) . . . . ?
O1 C5 C6 C7 178.6(6) . . . . ?
C4 C5 C6 C7 1.0(9) . . . . ?
O1 C5 C6 C10 -4.5(9) . . . . ?
C4 C5 C6 C10 178.0(6) . . . . ?
C5 C6 C7 C8 1.0(10) . . . . ?
C10 C6 C7 C8 -175.9(6) . . . . ?
C6 C7 C8 C9 -0.9(10) . . . . ?
C6 C7 C8 C14 -178.8(7) . . . . ?
C7 C8 C9 C4 -1.1(10) . . . . ?
C14 C8 C9 C4 176.7(6) . . . . ?
C5 C4 C9 C8 3.1(10) . . . . ?
C1 C4 C9 C8 -175.3(6) . . . . ?
C7 C6 C10 C11 119.3(7) . . . . ?
C5 C6 C10 C11 -57.5(8) . . . . ?
C7 C6 C10 C12 -118.8(7) . . . . ?
C5 C6 C10 C12 64.4(8) . . . . ?
C7 C6 C10 C13 0.5(9) . . . . ?
C5 C6 C10 C13 -176.2(6) . . . . ?
C9 C8 C14 C15 -105.4(7) . . . . ?
C7 C8 C14 C15 72.4(8) . . . . ?
C9 C8 C14 C17 15.3(9) . . . . ?
C7 C8 C14 C17 -167.0(6) . . . . ?
C9 C8 C14 C16 133.9(7) . . . . ?
C7 C8 C14 C16 -48.4(8) . . . . ?
N1 C2 C18 C23 -126.0(6) . . . . ?
N1 C2 C18 C19 49.8(7) . . . . ?
Co1 O2 C19 C20 143.3(5) . . . . ?
Co1 O2 C19 C18 -36.2(8) . . . . ?
C23 C18 C19 O2 -175.6(6) . . . . ?
C2 C18 C19 O2 8.6(9) . . . . ?
C23 C18 C19 C20 4.9(10) . . . . ?
C2 C18 C19 C20 -170.9(6) . . . . ?
O2 C19 C20 C21 173.2(6) . . . . ?
C18 C19 C20 C21 -7.3(9) . . . . ?
O2 C19 C20 C24 -8.0(9) . . . . ?
C18 C19 C20 C24 171.5(6) . . . . ?
C19 C20 C21 C22 4.6(10) . . . . ?
C24 C20 C21 C22 -174.2(6) . . . . ?
C20 C21 C22 C23 0.9(10) . . . . ?
C20 C21 C22 C28 -176.6(6) . . . . ?
C19 C18 C23 C22 0.8(10) . . . . ?
C2 C18 C23 C22 176.5(6) . . . . ?
C21 C22 C23 C18 -3.6(9) . . . . ?
C28 C22 C23 C18 173.9(6) . . . . ?
C21 C20 C24 C25 132.1(7) . . . . ?
C19 C20 C24 C25 -46.6(8) . . . . ?
C21 C20 C24 C26 -105.0(8) . . . . ?
C19 C20 C24 C26 76.2(8) . . . . ?
C21 C20 C24 C27 14.2(10) . . . . ?
C19 C20 C24 C27 -164.5(6) . . . . ?
C21 C22 C28 C30 83.0(8) . . . . ?
C23 C22 C28 C30 -94.4(8) . . . . ?
C21 C22 C28 C29 -156.4(7) . . . . ?
C23 C22 C28 C29 26.3(9) . . . . ?
C21 C22 C28 C31 -36.5(9) . . . . ?
C23 C22 C28 C31 146.2(7) . . . . ?
N1 C3 C32 C37 -131.9(6) . . . . ?
N1 C3 C32 C33 50.4(8) . . . . ?
Co1 O3 C33 C32 -17.9(9) . . . . ?
Co1 O3 C33 C34 162.1(5) . . . . ?
C37 C32 C33 O3 178.7(6) . . . . ?
C3 C32 C33 O3 -3.6(9) . . . . ?
C37 C32 C33 C34 -1.3(9) . . . . ?
C3 C32 C33 C34 176.4(6) . . . . ?
O3 C33 C34 C35 -179.6(6) . . . . ?
C32 C33 C34 C35 0.5(9) . . . . ?
O3 C33 C34 C38 -2.5(9) . . . . ?
C32 C33 C34 C38 177.5(6) . . . . ?
C33 C34 C35 C36 0.3(10) . . . . ?
C38 C34 C35 C36 -176.7(6) . . . . ?
C34 C35 C36 C37 -0.3(10) . . . . ?
C34 C35 C36 C42 177.1(6) . . . . ?
C35 C36 C37 C32 -0.6(9) . . . . ?
C42 C36 C37 C32 -177.9(6) . . . . ?
C33 C32 C37 C36 1.4(10) . . . . ?
C3 C32 C37 C36 -176.3(6) . . . . ?
C35 C34 C38 C39 -126.9(7) . . . . ?
C33 C34 C38 C39 56.2(8) . . . . ?
C35 C34 C38 C41 -8.2(9) . . . . ?
C33 C34 C38 C41 174.9(6) . . . . ?
C35 C34 C38 C40 110.1(7) . . . . ?
C33 C34 C38 C40 -66.8(8) . . . . ?
C37 C36 C42 C43 -5.5(9) . . . . ?
C35 C36 C42 C43 177.3(6) . . . . ?
C37 C36 C42 C44 -126.6(7) . . . . ?
C35 C36 C42 C44 56.2(8) . . . . ?
C37 C36 C42 C45 113.8(7) . . . . ?
C35 C36 C42 C45 -63.4(8) . . . . ?
C50 N2 C46 C47 0.9(10) . . . . ?
Co1 N2 C46 C47 175.9(6) . . . . ?
N2 C46 C47 C48 -0.9(12) . . . . ?
C51 N3 C48 C47 176.7(7) . . . . ?
C52 N3 C48 C47 -4.3(11) . . . . ?
C51 N3 C48 C49 -3.1(10) . . . . ?
C52 N3 C48 C49 175.9(7) . . . . ?
C46 C47 C48 N3 179.7(7) . . . . ?
C46 C47 C48 C49 -0.5(10) . . . . ?
N3 C48 C49 C50 -178.4(6) . . . . ?
C47 C48 C49 C50 1.8(10) . . . . ?
C46 N2 C50 C49 0.5(10) . . . . ?
Co1 N2 C50 C49 -174.2(5) . . . . ?
C48 C49 C50 N2 -2.0(11) . . . . ?
 
_refine_diff_density_max    0.508
_refine_diff_density_min   -0.841
_refine_diff_density_rms    0.102
_shelxl_version_number 2012-9
_shelx_res_file
;
TITL mo_C123_0m in P2(1)/c
CELL 0.71073  18.2611  15.9162  18.7390  90.000 115.374  90.000
ZERR    4.00   0.0060   0.0046   0.0064   0.000   0.008   0.000
LATT 1
SYMM -X, 0.5+Y, 0.5-Z
SFAC C  H  N  O  Co
UNIT 208  304  12  12  4
L.S. 20
ACTA
CONF
BOND
FMAP 2
PLAN 5
SIZE 0.01 0.10 0.10
TEMP -173.200
WGHT    0.081800
FVAR       0.09921
MOLE 1
CO1   5    0.699260    0.985878    0.767877    11.00000    0.02861    0.01903 =
         0.01708    0.00120    0.01083   -0.00103
N1    3    0.718499    0.927032    0.865264    11.00000    0.01548    0.01660 =
         0.01013   -0.00163    0.00334   -0.00549
N2    3    0.679260    1.042888    0.666670    11.00000    0.02859    0.02764 =
         0.01910    0.00415    0.01439   -0.00267
N3    3    0.647424    1.149549    0.449890    11.00000    0.04470    0.03865 =
         0.02348    0.01220    0.01236   -0.00051
O1    4    0.747259    0.899687    0.733584    11.00000    0.03257    0.02169 =
         0.01601    0.00610    0.01224    0.00726
O2    4    0.586584    0.993328    0.739422    11.00000    0.02261    0.01649 =
         0.01856    0.00537    0.00805    0.00559
O3    4    0.766812    1.076988    0.822468    11.00000    0.03354    0.01368 =
         0.01660    0.00008    0.00809   -0.01288
C1    1    0.798685    0.883321    0.896735    11.00000    0.02157    0.01946 =
         0.01129   -0.00134    0.00615   -0.00040
AFIX  23
H1A   2    0.812326    0.863395    0.951016    11.00000   -1.20000
H1B   2    0.840956    0.923884    0.899593    11.00000   -1.20000
AFIX   0
C2    1    0.650404    0.863320    0.845263    11.00000    0.02545    0.01775 =
         0.01464    0.00089    0.00847   -0.00213
AFIX  23
H2A   2    0.642711    0.833301    0.796278    11.00000   -1.20000
H2B   2    0.666233    0.821372    0.888308    11.00000   -1.20000
AFIX   0
C3    1    0.717520    0.988596    0.925499    11.00000    0.01912    0.01343 =
         0.01888    0.00467    0.01139    0.00231
AFIX  23
H3A   2    0.667022    1.022048    0.901786    11.00000   -1.20000
H3B   2    0.716712    0.957108    0.970718    11.00000   -1.20000
AFIX   0
C4    1    0.799267    0.809533    0.846377    11.00000    0.01820    0.02595 =
         0.01095    0.00235    0.00599   -0.00179
C5    1    0.773977    0.822804    0.765609    11.00000    0.01291    0.01472 =
         0.02180    0.00582    0.00643   -0.00495
C6    1    0.779218    0.756494    0.717215    11.00000    0.01976    0.02299 =
         0.01408   -0.00806    0.00525   -0.00406
C7    1    0.808749    0.679970    0.753877    11.00000    0.03533    0.01868 =
         0.02936   -0.00795    0.02012   -0.00302
AFIX  43
H7    2    0.813448    0.635211    0.722557    11.00000   -1.20000
AFIX   0
C8    1    0.832161    0.664830    0.834852    11.00000    0.01718    0.02160 =
         0.01621   -0.00636    0.00532   -0.00153
C9    1    0.826381    0.730025    0.880001    11.00000    0.01982    0.02269 =
         0.01532    0.00023    0.00738   -0.00064
AFIX  43
H9    2    0.840847    0.721374    0.934559    11.00000   -1.20000
AFIX   0
C10   1    0.749006    0.768911    0.627327    11.00000    0.04156    0.02548 =
         0.01053   -0.00678    0.01059   -0.00674
C11   1    0.659493    0.794664    0.588923    11.00000    0.04116    0.04152 =
         0.01569    0.00386    0.00850   -0.00562
AFIX 137
H11A  2    0.652710    0.847523    0.612237    11.00000   -1.50000
H11B  2    0.626841    0.750704    0.597967    11.00000   -1.50000
H11C  2    0.641700    0.802229    0.532013    11.00000   -1.50000
AFIX   0
C12   1    0.800094    0.835725    0.610562    11.00000    0.05222    0.04139 =
         0.02797   -0.00103    0.02818   -0.00351
AFIX 137
H12A  2    0.800232    0.887538    0.638873    11.00000   -1.50000
H12B  2    0.776924    0.847064    0.553705    11.00000   -1.50000
H12C  2    0.855779    0.815275    0.628392    11.00000   -1.50000
AFIX   0
C13   1    0.755752    0.686148    0.586378    11.00000    0.08155    0.04075 =
         0.01591   -0.00743    0.01949    0.00484
AFIX 137
H13A  2    0.735353    0.695638    0.529409    11.00000   -1.50000
H13B  2    0.723546    0.642147    0.596040    11.00000   -1.50000
H13C  2    0.812607    0.668525    0.607889    11.00000   -1.50000
AFIX   0
C14   1    0.866084    0.577329    0.870499    11.00000    0.03923    0.01905 =
         0.02748   -0.00401    0.01255   -0.00278
C15   1    0.951845    0.567242    0.875490    11.00000    0.03993    0.02396 =
         0.04467   -0.00248    0.01502    0.00196
AFIX 137
H15A  2    0.949920    0.573459    0.822683    11.00000   -1.50000
H15B  2    0.972857    0.511446    0.896380    11.00000   -1.50000
H15C  2    0.987448    0.610389    0.910589    11.00000   -1.50000
AFIX   0
C16   1    0.810771    0.505824    0.818821    11.00000    0.04093    0.02029 =
         0.03302   -0.00322    0.01657    0.00092
AFIX 137
H16A  2    0.756217    0.512074    0.816030    11.00000   -1.50000
H16B  2    0.833206    0.451304    0.842349    11.00000   -1.50000
H16C  2    0.808007    0.509000    0.765496    11.00000   -1.50000
AFIX   0
C17   1    0.869749    0.566363    0.954057    11.00000    0.05575    0.02040 =
         0.02962    0.00161    0.01190    0.00420
AFIX 137
H17A  2    0.908900    0.606201    0.990450    11.00000   -1.50000
H17B  2    0.886600    0.508874    0.972524    11.00000   -1.50000
H17C  2    0.816067    0.577071    0.952089    11.00000   -1.50000
AFIX   0
C18   1    0.572360    0.902685    0.834105    11.00000    0.01698    0.01963 =
         0.01789   -0.00170    0.00562    0.00420
C19   1    0.545771    0.973030    0.782881    11.00000    0.02067    0.01550 =
         0.01207    0.00118    0.00610    0.00049
C20   1    0.478928    1.019329    0.779446    11.00000    0.02179    0.01505 =
         0.01885   -0.00154    0.00598    0.00607
C21   1    0.436926    0.986557    0.820500    11.00000    0.02430    0.02827 =
         0.02246    0.00140    0.01202    0.00260
AFIX  43
H21   2    0.389246    1.015244    0.815219    11.00000   -1.20000
AFIX   0
C22   1    0.458911    0.915963    0.868110    11.00000    0.01625    0.02173 =
         0.01503   -0.00140    0.00160    0.00023
C23   1    0.529733    0.875644    0.875848    11.00000    0.02578    0.01676 =
         0.01917    0.00262    0.01041   -0.00140
AFIX  43
H23   2    0.549144    0.828809    0.910328    11.00000   -1.20000
AFIX   0
C24   1    0.454970    1.102768    0.733888    11.00000    0.03754    0.01932 =
         0.03566    0.00777    0.02043    0.00545
C25   1    0.529170    1.159050    0.753731    11.00000    0.05618    0.02280 =
         0.04703    0.01476    0.02604    0.00761
AFIX 137
H25A  2    0.560798    1.161461    0.811157    11.00000   -1.50000
H25B  2    0.511382    1.215772    0.733317    11.00000   -1.50000
H25C  2    0.562817    1.135935    0.729416    11.00000   -1.50000
AFIX   0
C26   1    0.411912    1.086468    0.644264    11.00000    0.06238    0.03788 =
         0.03921    0.01657    0.01464    0.01616
AFIX 137
H26A  2    0.450283    1.061415    0.626512    11.00000   -1.50000
H26B  2    0.391676    1.139702    0.616496    11.00000   -1.50000
H26C  2    0.366392    1.047921    0.632782    11.00000   -1.50000
AFIX   0
C27   1    0.395606    1.152220    0.758239    11.00000    0.05788    0.03195 =
         0.07153    0.02471    0.04038    0.02454
AFIX 137
H27A  2    0.345258    1.120219    0.742784    11.00000   -1.50000
H27B  2    0.383537    1.206923    0.731674    11.00000   -1.50000
H27C  2    0.420679    1.160627    0.815578    11.00000   -1.50000
AFIX   0
C28   1    0.407074    0.880966    0.907779    11.00000    0.01971    0.02296 =
         0.02490   -0.00012    0.01072   -0.00189
C29   1    0.455911    0.829128    0.980393    11.00000    0.04534    0.09524 =
         0.06564    0.04594    0.03843    0.01843
AFIX 137
H29A  2    0.498493    0.864113    1.019300    11.00000   -1.50000
H29B  2    0.480685    0.781582    0.965671    11.00000   -1.50000
H29C  2    0.420197    0.808100    1.003257    11.00000   -1.50000
AFIX   0
C30   1    0.341106    0.826751    0.849645    11.00000    0.05542    0.06716 =
         0.05923   -0.01821    0.03870   -0.02761
AFIX 137
H30A  2    0.304845    0.808414    0.872883    11.00000   -1.50000
H30B  2    0.365247    0.777476    0.836670    11.00000   -1.50000
H30C  2    0.310203    0.859005    0.801468    11.00000   -1.50000
AFIX   0
C31   1    0.367763    0.951225    0.934075    11.00000    0.07674    0.04123 =
         0.08080    0.00815    0.06240    0.00377
AFIX 137
H31A  2    0.327946    0.980373    0.887564    11.00000   -1.50000
H31B  2    0.409438    0.991108    0.967002    11.00000   -1.50000
H31C  2    0.340566    0.927478    0.964608    11.00000   -1.50000
AFIX   0
C32   1    0.788344    1.047181    0.955415    11.00000    0.02020    0.01311 =
         0.02042   -0.00273    0.00967    0.00119
C33   1    0.807895    1.090593    0.900739    11.00000    0.02422    0.01879 =
         0.01185    0.00086    0.00257   -0.00413
C34   1    0.872816    1.150314    0.929526    11.00000    0.02766    0.01976 =
         0.01697   -0.00500    0.01098   -0.01317
C35   1    0.913322    1.161154    1.011115    11.00000    0.02422    0.01262 =
         0.02313   -0.00426    0.01039   -0.00699
AFIX  43
H35   2    0.956253    1.200884    1.030645    11.00000   -1.20000
AFIX   0
C36   1    0.894896    1.117378    1.066079    11.00000    0.01664    0.01819 =
         0.01846   -0.00292    0.00676   -0.00271
C37   1    0.832045    1.060389    1.036022    11.00000    0.02062    0.01862 =
         0.01425   -0.00029    0.00831    0.00201
AFIX  43
H37   2    0.818184    1.029121    1.071656    11.00000   -1.20000
AFIX   0
C38   1    0.898952    1.196804    0.872750    11.00000    0.04023    0.02585 =
         0.02362    0.00302    0.01592   -0.00966
C39   1    0.828220    1.244039    0.809040    11.00000    0.05676    0.02543 =
         0.03184    0.00651    0.02903   -0.00531
AFIX 137
H39A  2    0.783391    1.204954    0.781661    11.00000   -1.50000
H39B  2    0.845828    1.268604    0.771013    11.00000   -1.50000
H39C  2    0.810099    1.288839    0.833606    11.00000   -1.50000
AFIX   0
C40   1    0.936019    1.131604    0.836293    11.00000    0.03935    0.04289 =
         0.03310    0.00481    0.02119   -0.00534
AFIX 137
H40A  2    0.985532    1.108139    0.877880    11.00000   -1.50000
H40B  2    0.949092    1.159061    0.796381    11.00000   -1.50000
H40C  2    0.896889    1.086350    0.811549    11.00000   -1.50000
AFIX   0
C41   1    0.964373    1.263481    0.915559    11.00000    0.05560    0.04492 =
         0.03522    0.00598    0.02097   -0.02098
AFIX 137
H41A  2    0.944377    1.302691    0.943484    11.00000   -1.50000
H41B  2    0.976771    1.294357    0.876826    11.00000   -1.50000
H41C  2    1.013567    1.235790    0.953585    11.00000   -1.50000
AFIX   0
C42   1    0.946368    1.131532    1.154918    11.00000    0.02869    0.02359 =
         0.01745   -0.00813    0.01133   -0.00691
C43   1    0.914710    1.081804    1.204977    11.00000    0.04938    0.04692 =
         0.01684   -0.00361    0.01179   -0.01335
AFIX 137
H43A  2    0.947395    1.094650    1.260908    11.00000   -1.50000
H43B  2    0.918209    1.021585    1.195977    11.00000   -1.50000
H43C  2    0.858091    1.097081    1.190355    11.00000   -1.50000
AFIX   0
C44   1    0.947501    1.223970    1.175390    11.00000    0.09834    0.02361 =
         0.03352   -0.00769    0.03628   -0.01527
AFIX 137
H44A  2    0.973836    1.256213    1.148343    11.00000   -1.50000
H44B  2    0.977607    1.231367    1.232604    11.00000   -1.50000
H44C  2    0.891793    1.243993    1.158436    11.00000   -1.50000
AFIX   0
C45   1    1.033291    1.102518    1.175895    11.00000    0.03718    0.07380 =
         0.03614   -0.01177    0.01146   -0.00015
AFIX 137
H45A  2    1.055887    1.135816    1.146097    11.00000   -1.50000
H45B  2    1.032936    1.042992    1.162380    11.00000   -1.50000
H45C  2    1.066588    1.110209    1.232611    11.00000   -1.50000
AFIX   0
C46   1    0.741785    1.072237    0.654367    11.00000    0.03360    0.05039 =
         0.02175    0.00879    0.01402    0.00393
AFIX  43
H46   2    0.794515    1.068164    0.696452    11.00000   -1.20000
AFIX   0
C47   1    0.734412    1.107864    0.584678    11.00000    0.03313    0.04072 =
         0.03311    0.01225    0.01745   -0.00535
AFIX  43
H47   2    0.781230    1.128127    0.580258    11.00000   -1.20000
AFIX   0
C48   1    0.658261    1.114441    0.520184    11.00000    0.04463    0.02228 =
         0.01508    0.00425    0.01328   -0.00380
C49   1    0.592421    1.081632    0.532764    11.00000    0.03553    0.02953 =
         0.02078    0.00245    0.00394   -0.00590
AFIX  43
H49   2    0.539071    1.082242    0.491424    11.00000   -1.20000
AFIX   0
C50   1    0.606847    1.048974    0.605516    11.00000    0.02996    0.02559 =
         0.01703    0.00113    0.00422   -0.00585
AFIX  43
H50   2    0.561420    1.029125    0.612739    11.00000   -1.20000
AFIX   0
C51   1    0.567676    1.150642    0.383768    11.00000    0.07410    0.03037 =
         0.02417    0.00376    0.01895   -0.00853
AFIX 137
H51A  2    0.541682    1.095807    0.379393    11.00000   -1.50000
H51B  2    0.573090    1.162562    0.334943    11.00000   -1.50000
H51C  2    0.534452    1.194293    0.392358    11.00000   -1.50000
AFIX   0
C52   1    0.715429    1.187516    0.440897    11.00000    0.05695    0.07191 =
         0.05689    0.02860    0.03769   -0.00973
AFIX 137
H52A  2    0.739194    1.231768    0.480561    11.00000   -1.50000
H52B  2    0.696495    1.211855    0.387938    11.00000   -1.50000
H52C  2    0.756425    1.144508    0.448133    11.00000   -1.50000
AFIX   0
HKLF 4
REM  mo_C123_0m in P2(1)/c
REM R1 =  0.0720 for    3416 Fo > 4sig(Fo)  and  0.2301 for all    8300 data
REM    552 parameters refined using      0 restraints
END
WGHT      0.0819      0.0000
REM Highest difference peak  0.508,  deepest hole -0.841,  1-sigma level  0.102
Q1    1   0.7505  0.9837  0.8145  11.00000  0.05    0.51
Q2    1   0.6475  0.9940  0.7206  11.00000  0.05    0.48
Q3    1   0.4702  0.7427  0.9211  11.00000  0.05    0.40
Q4    1   0.7946  0.5604  0.6851  11.00000  0.05    0.39
Q5    1   0.4107  0.7945  0.9084  11.00000  0.05    0.38
;
_shelx_res_checksum   43499
_shelx_hkl_file
;
  -2   0   0  314.31    9.79
   2   0   0  308.66    9.76
  -3   0   0   20.12    1.82
   3   0   0   22.38    1.85
  -4   0   0   26.39    2.45
   4   0   0   43.58    3.78
  -5   0   0   26.54    2.42
   5   0   0   27.60    2.42
   6   0   0   31.17    2.67
  -6   0   0   26.66    2.64
   7   0   0    2.53    2.19
  -7   0   0    2.86    2.26
  -8   0   0  226.38    8.87
   8   0   0  226.96    8.78
  -9   0   0    2.32    2.65
   9   0   0    3.88    2.55
  10   0   0    1.18    2.66
 -10   0   0    3.20    2.85
 -11   0   0    2.34    3.12
  11   0   0   -0.37    2.85
 -12   0   0   17.27    3.72
 -13   0   0    0.98    3.74
 -14   0   0    5.88    4.07
 -15   0   0    4.54    4.13
 -16   0   0    2.20    4.39
 -17   0   0   19.74    5.09
 -18   0   0   13.72    5.22
 -19   0   0    7.72    5.25
   0  -1   0   -0.42    0.17
   0  -1   0   -0.13    0.23
   0   1   0   -1.00    0.44
   0   1   0   -0.02    0.38
  -1  -1   0   -0.75    0.37
   1   1   0   -0.15    0.11
   2  -1   0    1.16    0.81
  -2  -1   0    1.17    1.11
   2   1   0   -0.86    1.15
  -2   1   0   -0.04    0.80
  -3  -1   0  441.75   13.89
   3  -1   0  424.59   13.56
   3   1   0  436.89   13.97
  -3   1   0  430.14   13.58
   4  -1   0  226.68    7.77
  -4  -1   0  232.52    8.34
   4   1   0  223.62    8.28
  -4   1   0  219.61    7.82
  -5  -1   0   15.87    2.40
   5  -1   0   16.66    2.00
   5   1   0   16.18    2.32
  -5   1   0   17.69    2.12
   6  -1   0   38.69    3.49
  -6  -1   0   35.91    3.03
  -6   1   0   45.30    3.58
   6   1   0   40.84    3.06
   7  -1   0   -0.59    2.05
  -7  -1   0    1.19    2.41
   7   1   0   -2.18    2.14
  -7   1   0    0.51    2.11
   8  -1   0    0.34    2.26
  -8  -1   0    1.96    2.65
  -8   1   0   -0.34    2.35
   8   1   0    3.87    2.54
  -9  -1   0   -2.31    2.71
   9  -1   0    1.40    2.41
  -9   1   0   -1.01    2.55
   9   1   0   -0.62    2.53
  10  -1   0   -2.44    2.47
 -10  -1   0    1.79    2.99
  10   1   0   -4.06    2.62
 -10   1   0    1.72    2.65
  11  -1   0    1.08    2.78
 -11  -1   0    0.82    3.18
  11   1   0    0.36    2.95
 -11   1   0    1.90    2.94
  12  -1   0   -0.53    2.95
 -12  -1   0   -3.47    3.42
 -12   1   0    0.80    3.17
 -13  -1   0   -6.58    3.65
 -13   1   0    4.78    3.59
 -14  -1   0    3.21    4.07
 -14   1   0   -0.87    3.84
 -15  -1   0   -1.79    4.11
 -15   1   0   -0.77    4.08
 -16  -1   0    2.96    4.41
 -16   1   0    6.46    4.37
 -17  -1   0    3.95    4.72
 -17   1   0    8.35    4.67
 -18  -1   0    9.52    5.12
 -18   1   0    5.08    4.92
 -19  -1   0   -2.13    5.04
 -19   1   0    5.94    5.08
   0  -2   0  234.74    7.17
   0  -2   0  240.95    7.44
   0   2   0  237.85    7.50
   0   2   0  225.24    7.21
   1  -2   0  322.10    9.89
  -1  -2   0  321.42   10.28
   1   2   0  322.94   10.31
   1   2   0  321.32    9.84
  -2  -2   0    8.08    1.64
   2   2   0    0.58    0.73
  -3  -2   0   58.42    3.79
   3  -2   0   59.16    2.74
  -3   2   0   41.45    2.95
   3   2   0   44.38    3.30
   4  -2   0    2.19    1.41
  -4  -2   0    3.82    2.09
   4   2   0    2.08    1.97
  -4   2   0    0.51    1.45
  -5  -2   0   75.97    4.80
   5  -2   0   80.32    3.71
   5   2   0   76.62    4.75
  -5   2   0   75.01    3.83
   6  -2   0   16.57    2.01
  -6  -2   0   15.21    2.57
  -6   2   0   16.77    2.08
   6   2   0   16.96    2.52
   7  -2   0  187.19    7.18
  -7  -2   0  191.68    7.99
  -7   2   0  181.62    7.26
   7   2   0  190.58    7.98
   8  -2   0   47.05    4.06
  -8  -2   0   40.51    3.82
   8   2   0   39.75    3.68
  -8   2   0   48.65    4.19
   9  -2   0    7.44    2.44
  -9  -2   0    8.39    3.04
  -9   2   0    6.72    2.53
   9   2   0    7.93    2.85
  10  -2   0   53.61    3.88
 -10  -2   0   47.14    4.38
  10   2   0   53.94    4.42
 -10   2   0   56.97    4.82
 -11  -2   0    6.26    3.42
  11  -2   0    8.94    2.90
 -11   2   0    8.79    3.03
  12  -2   0   21.16    3.53
 -12  -2   0   21.86    4.15
 -12   2   0   19.80    3.62
 -13  -2   0    6.68    4.11
  13  -2   0    8.89    3.56
 -13   2   0    9.75    3.75
 -14  -2   0    7.38    4.33
 -14   2   0   -1.25    3.68
 -15  -2   0    4.34    4.33
 -15   2   0    6.34    4.04
 -16  -2   0    0.78    4.58
 -16   2   0    5.54    4.30
 -17  -2   0    2.30    4.75
 -17   2   0    8.07    4.50
 -18  -2   0   14.51    5.29
 -18   2   0   18.94    5.03
 -19  -2   0    4.13    5.40
 -19   2   0    3.31    4.60
   0  -3   0    0.17    1.34
   0  -3   0    2.39    1.54
   0   3   0   -0.11    1.38
  -1  -3   0   81.12    4.07
   1  -3   0   84.89    3.31
   1   3   0   77.48    4.24
   1   3   0   78.66    4.09
  -2  -3   0    9.16    2.12
   2   3   0    4.97    2.02
   4  -3   0   41.97    2.35
  -4  -3   0   40.33    3.05
  -4   3   0   38.00    2.64
  -5  -3   0   16.72    2.68
   5  -3   0   21.25    1.69
  -5   3   0   19.48    1.78
   5   3   0   19.25    2.57
   6  -3   0   74.09    3.74
  -6  -3   0   79.91    5.29
   6   3   0   78.62    5.28
  -6   3   0   72.27    3.96
  -7  -3   0   41.95    3.72
   7  -3   0   42.29    3.40
  -7   3   0   41.73    3.80
   7   3   0   44.02    3.68
  -8  -3   0   78.95    5.85
   8  -3   0   87.00    4.61
  -8   3   0   86.76    4.82
   8   3   0   82.62    5.93
   9  -3   0    9.14    2.35
  -9  -3   0    7.87    3.07
   9   3   0    6.39    2.86
  -9   3   0    6.04    2.45
  10  -3   0   -1.82    2.30
 -10  -3   0   -0.10    3.12
 -10   3   0    0.09    2.48
  11  -3   0   18.61    3.02
 -11  -3   0   16.32    3.90
 -11   3   0   19.22    3.30
  12  -3   0    3.95    2.96
 -12  -3   0   -0.53    3.78
 -12   3   0    2.25    3.22
 -13  -3   0   12.22    4.34
  13  -3   0   14.66    3.52
 -13   3   0   12.36    3.77
  14  -3   0   -5.19    3.31
 -14  -3   0    6.76    4.39
 -14   3   0    0.98    3.66
 -15  -3   0   -2.97    4.26
 -15   3   0    0.48    3.83
 -16  -3   0   -0.77    4.67
 -16   3   0   10.99    4.21
 -17  -3   0   -0.24    4.96
 -17   3   0    6.34    4.29
 -18  -3   0   -0.85    5.03
 -18   3   0    1.72    4.29
 -19  -3   0   -0.71    5.36
   0  -4   0   78.04    3.80
   0  -4   0   79.37    4.07
   0   4   0   78.69    4.30
  -1  -4   0    3.76    1.90
   1  -4   0    1.19    1.41
  -1   4   0   -3.22    1.55
   1   4   0   -1.00    2.06
   1   4   0   -2.24    1.83
  -2  -4   0  121.47    5.39
   2  -4   0  111.33    4.10
   2   4   0  106.50    5.33
   2   4   0  119.20    5.45
  -3  -4   0   41.36    3.65
   3   4   0   35.82    2.86
   5  -4   0   16.03    1.39
  -5  -4   0   14.22    2.73
  -6  -4   0   54.66    4.88
   6  -4   0   63.01    3.25
   6   4   0   59.43    5.05
  -6   4   0   62.66    3.61
   7  -4   0   71.93    3.90
  -7  -4   0   85.93    5.81
   7   4   0   69.42    5.25
  -7   4   0   77.42    4.19
   8  -4   0   39.72    3.40
  -8  -4   0   32.95    3.79
  -8   4   0   35.27    2.84
   8   4   0   35.20    3.72
  -9  -4   0   19.24    3.47
   9  -4   0   16.23    2.43
  -9   4   0   16.42    2.55
   9   4   0   14.61    3.25
 -10  -4   0   56.24    4.95
  10  -4   0   64.04    4.41
 -10   4   0   61.48    4.72
  11  -4   0    7.61    2.70
 -11  -4   0   12.25    3.93
 -11   4   0   15.24    3.04
 -12  -4   0   14.68    4.25
  12  -4   0    8.58    3.03
 -12   4   0    7.96    3.15
 -13  -4   0   29.38    5.05
  13  -4   0   29.92    3.80
 -13   4   0   26.56    3.88
 -14  -4   0   -1.49    4.32
  14  -4   0   -3.27    3.25
 -14   4   0    4.25    3.46
 -15  -4   0   36.24    5.66
 -15   4   0   43.13    4.71
 -16  -4   0   -1.22    4.58
 -16   4   0    7.58    3.95
 -17  -4   0    0.44    5.03
 -17   4   0    6.85    4.17
 -18  -4   0    0.46    5.28
   0  -5   0    3.73    1.90
   0  -5   0   -0.96    1.46
   0   5   0    0.63    1.69
  -1  -5   0    3.66    1.88
   1  -5   0    0.13    1.41
   1  -5   0    2.42    1.96
  -1   5   0    2.06    1.66
   1   5   0    1.04    1.88
   1   5   0    4.54    2.13
   2  -5   0    2.94    1.26
  -2  -5   0    7.58    2.10
   2   5   0    2.32    2.04
   2   5   0    2.52    1.89
  -3  -5   0   46.91    4.11
   3   5   0   43.96    3.87
  -4  -5   0  120.40    6.17
   4   5   0  130.71    6.13
  -5  -5   0   22.19    3.15
   5   5   0   23.89    2.89
   7  -5   0   -0.03    1.42
  -7  -5   0   -2.63    2.65
   7   5   0   -1.51    2.19
  -8  -5   0    3.45    3.05
   8  -5   0    3.35    1.70
  -8   5   0    1.66    1.94
   8   5   0    1.01    2.72
  -9  -5   0    1.44    3.13
   9  -5   0   -4.70    1.82
  -9   5   0   -2.17    2.11
  10  -5   0   -1.67    2.07
 -10  -5   0    0.11    3.38
 -10   5   0    2.35    2.43
  11  -5   0    0.32    2.38
 -11  -5   0    1.46    3.73
 -11   5   0    2.99    2.67
  12  -5   0    0.21    2.73
 -12  -5   0   -0.54    3.97
 -12   5   0   -0.02    2.90
  13  -5   0   15.18    3.28
 -13  -5   0   11.14    4.62
 -13   5   0   11.20    3.36
 -14  -5   0   -5.99    4.30
 -14   5   0    2.54    3.33
 -15  -5   0   -2.20    4.59
 -15   5   0    2.21    3.43
 -16  -5   0    0.45    4.90
 -16   5   0   13.87    3.91
 -17  -5   0    4.05    5.46
 -18  -5   0    2.17    5.56
   0  -6   0   18.70    2.47
   0  -6   0   19.24    2.04
   0   6   0   19.03    2.27
   1  -6   0  140.62    5.61
  -1  -6   0  156.92    6.28
   1  -6   0  155.72    5.91
   1   6   0  149.26    6.30
  -1   6   0  145.28    5.94
   1   6   0  143.23    6.37
  -2  -6   0    7.07    2.20
   2  -6   0    7.19    1.46
   2   6   0   -0.18    1.51
   2   6   0   11.40    2.42
   3  -6   0   24.59    2.16
  -3  -6   0   28.53    2.92
   3   6   0   23.79    2.82
  -4  -6   0    8.31    2.68
   4   6   0   11.65    2.86
   4   6   0    9.86    2.60
  -5  -6   0   50.18    4.12
   5   6   0   55.48    4.11
  -6  -6   0   33.24    3.82
   6   6   0   32.43    3.53
  -7  -6   0    0.58    2.89
   7   6   0   -0.07    1.84
  -8  -6   0   56.34    4.74
  -9  -6   0    5.28    3.42
   9  -6   0    1.43    1.73
  10  -6   0   54.22    3.89
 -10  -6   0   56.55    5.30
 -11  -6   0    0.99    3.97
  11  -6   0    2.63    2.32
 -11   6   0    3.01    2.46
 -12  -6   0   10.29    4.52
  12  -6   0   10.72    2.80
 -12   6   0   12.98    2.95
  13  -6   0    8.33    2.98
 -13  -6   0    1.98    4.50
 -13   6   0    6.20    3.00
 -14  -6   0    6.52    4.87
 -14   6   0   14.24    3.32
 -15  -6   0    0.66    4.81
 -15   6   0    9.01    3.30
 -16  -6   0   -1.53    4.97
 -17  -6   0    1.10    5.25
 -18  -6   0    0.13    5.58
   0  -7   0   -1.03    2.07
   0  -7   0    3.37    1.85
   0   7   0    1.37    1.99
   1  -7   0   18.00    2.13
   1  -7   0   21.77    2.61
  -1  -7   0   25.01    2.68
  -1   7   0   18.49    2.44
   1   7   0   21.83    2.97
   2  -7   0   12.18    1.81
  -2  -7   0   10.27    2.53
   2   7   0   13.78    2.50
   2   7   0    2.31    1.92
   3  -7   0   20.49    1.71
  -3  -7   0   18.58    2.89
   3   7   0   17.68    2.80
   3   7   0   13.54    2.96
  -4  -7   0    8.26    2.88
   4   7   0    9.91    2.77
   4   7   0   10.17    3.03
  -5  -7   0    1.27    2.73
   5   7   0   -1.56    2.64
   5   7   0    2.59    2.66
  -6  -7   0    2.36    2.89
   6   7   0    1.06    2.67
  -7  -7   0    7.21    3.26
  -8  -7   0   13.81    3.54
  -9  -7   0   18.43    4.00
 -10  -7   0    3.32    3.73
 -11  -7   0   12.44    4.39
 -12  -7   0   -0.44    4.27
  12  -7   0    1.01    2.27
 -13  -7   0   -0.54    4.50
 -14  -7   0   -6.08    4.55
 -15  -7   0    6.73    5.16
 -16  -7   0   12.01    5.58
 -17  -7   0    4.84    5.55
   0  -8   0   34.67    2.87
   0  -8   0   29.21    3.01
   0   8   0   30.54    2.87
  -1  -8   0   17.58    2.64
   1  -8   0   17.04    2.27
   1  -8   0   22.85    2.80
  -1   8   0   22.00    2.57
   1   8   0   16.12    2.59
  -2  -8   0   18.97    2.85
   2  -8   0   12.20    2.59
   2  -8   0   12.33    1.98
   2   8   0   11.59    2.70
   2   8   0   14.46    2.73
  -3  -8   0   30.98    3.47
   3  -8   0   32.72    2.84
   3   8   0   31.13    3.43
   3   8   0   43.38    4.01
  -4  -8   0    4.69    2.76
   4   8   0    1.81    2.60
   4   8   0    3.22    2.88
  -5  -8   0   12.27    3.20
   5   8   0   11.40    3.06
  -6  -8   0    1.63    3.12
  -7  -8   0   16.55    3.58
  -8  -8   0   27.27    4.25
  -9  -8   0    0.76    3.65
   9   8   0    3.34    1.42
 -10  -8   0    8.04    4.14
 -11  -8   0   -0.24    4.18
 -12  -8   0    3.49    4.51
 -13  -8   0   -1.92    4.60
 -14  -8   0    0.78    4.96
 -15  -8   0   -6.12    4.86
 -16  -8   0   -5.09    5.12
 -17  -8   0   17.70    6.09
   0  -9   0    2.71    2.17
   0  -9   0   -0.54    2.34
   0   9   0    0.58    1.80
   1  -9   0    3.79    2.37
   1  -9   0    5.64    2.07
  -1  -9   0    7.74    2.56
   1   9   0    4.46    2.46
  -2  -9   0   18.71    2.97
   2  -9   0   21.32    2.31
   2  -9   0   19.83    2.77
   2   9   0   20.03    3.43
   2   9   0   24.63    3.23
   3  -9   0   31.03    2.36
  -3  -9   0   29.95    3.51
   3  -9   0   34.11    3.22
   3   9   0   37.19    4.04
   3   9   0   33.73    3.69
  -4  -9   0    1.94    2.87
   4   9   0    3.13    2.75
  -5  -9   0    1.38    3.03
  -6  -9   0   23.00    3.95
  -7  -9   0   -1.15    3.27
  -8  -9   0    3.21    3.82
  -9  -9   0    4.46    4.00
 -10  -9   0   14.42    4.56
 -11  -9   0   21.74    5.02
  11   9   0   21.61    2.01
 -12  -9   0    1.14    4.48
 -13  -9   0   -2.40    4.74
 -14  -9   0   14.55    5.49
 -15  -9   0    0.38    5.27
 -16  -9   0    4.70    5.70
   0 -10   0   26.23    3.00
   0  10   0   23.79    3.15
   1 -10   0   12.76    2.73
  -1 -10   0   12.83    2.82
   1 -10   0   10.48    2.39
   1  10   0    9.55    2.92
   2 -10   0    9.52    2.67
   2 -10   0    5.25    2.14
  -2 -10   0    9.87    2.95
   2  10   0    5.85    2.90
   3 -10   0    1.53    1.86
  -3 -10   0    6.80    3.05
   3 -10   0    5.73    2.52
   3  10   0    5.53    2.92
   3  10   0    5.40    3.29
  -4 -10   0   27.02    3.81
   4 -10   0   24.35    2.11
   4  10   0   28.43    3.85
  -5 -10   0   17.50    3.73
  -6 -10   0   15.98    3.90
  -7 -10   0   31.96    4.69
  -8 -10   0   11.85    4.19
  -9 -10   0   -2.64    3.96
 -10 -10   0    1.58    4.34
 -11 -10   0   -9.46    4.21
 -12 -10   0   -2.86    4.48
 -13 -10   0    3.39    4.97
 -14 -10   0   -3.59    5.11
 -15 -10   0   -4.52    5.25
 -16 -10   0   -2.13    5.53
   0 -11   0    2.66    2.53
   0  11   0    3.06    2.70
   1 -11   0   35.18    3.30
  -1 -11   0   37.16    3.74
   1 -11   0   38.25    3.58
   1  11   0   40.16    3.91
   2 -11   0   22.35    2.77
   2 -11   0   27.86    3.29
  -2 -11   0   29.08    3.76
   2  11   0   26.07    3.75
   3 -11   0    2.40    2.05
   3 -11   0    3.59    2.64
  -3 -11   0    5.61    3.27
   3  11   0    5.31    3.21
   4 -11   0    0.05    2.51
  -4 -11   0    0.72    3.24
   4 -11   0   -3.65    1.68
  -5 -11   0   12.04    3.79
  -6 -11   0   23.67    4.38
  -7 -11   0   31.55    4.90
  -8 -11   0    4.24    4.15
  -9 -11   0    5.80    4.39
 -10 -11   0    3.02    4.53
 -11 -11   0   -1.04    4.64
 -12 -11   0   -0.72    4.80
 -13 -11   0   -0.53    5.18
 -14 -11   0   14.95    5.78
 -15 -11   0   -8.10    5.36
   0 -12   0   81.04    5.78
  -1 -12   0    1.95    2.92
   1 -12   0   -1.80    2.47
   1  12   0    6.03    3.14
   2 -12   0   17.56    3.00
   2 -12   0   14.28    2.68
  -2 -12   0    9.05    3.41
   2  12   0   17.43    3.65
   3 -12   0   10.69    2.90
   3 -12   0    7.40    2.32
  -3 -12   0   14.08    3.68
   4 -12   0   -1.64    1.92
   4 -12   0    8.69    2.80
  -4 -12   0    3.47    3.65
  -5 -12   0   -2.98    3.48
   5 -12   0    5.86    2.74
  -6 -12   0    2.42    3.90
  -7 -12   0   30.54    4.99
  -8 -12   0    5.54    4.27
  -9 -12   0    6.77    4.63
 -10 -12   0    7.80    4.77
 -11 -12   0   -0.97    4.92
 -12 -12   0    2.28    5.17
 -13 -12   0   -6.33    5.24
 -14 -12   0   -2.13    5.47
   0 -13   0   -0.57    2.88
  -1 -13   0   61.13    3.66
  -1 -13   0   72.56    6.18
   1 -13   0   66.37    5.43
   1  13   0   78.07    6.31
  -2 -13   0    2.27    3.34
   2 -13   0   -4.77    2.44
  -3 -13   0   10.20    3.83
   3 -13   0    5.56    2.83
   3 -13   0    3.74    2.42
   4 -13   0    0.19    2.67
  -4 -13   0    0.20    3.61
   4 -13   0   -4.27    1.93
   5 -13   0    7.75    2.87
  -5 -13   0    7.40    4.07
  -6 -13   0    2.32    4.03
   6 -13   0    3.47    2.78
  -7 -13   0    1.15    4.14
  -8 -13   0    1.71    4.36
  -9 -13   0   15.33    5.11
 -10 -13   0    5.57    4.88
 -11 -13   0    5.63    5.17
 -12 -13   0    3.09    5.46
 -13 -13   0    3.59    5.77
   0 -14   0    4.56    3.13
   1 -14   0   -5.94    2.69
  -1 -14   0   -1.77    3.15
  -2 -14   0   -1.02    3.27
   2 -14   0    3.86    2.68
   3 -14   0    2.53    2.47
  -3 -14   0    6.51    3.70
   4 -14   0    5.08    2.75
   4 -14   0    3.65    2.10
  -4 -14   0    5.25    3.89
  -5 -14   0    7.85    4.00
   5 -14   0    4.27    2.75
   6 -14   0    3.92    2.72
  -6 -14   0   -3.03    3.92
  -7 -14   0   -2.20    4.34
  -8 -14   0   -4.07    4.30
  -9 -14   0    0.41    4.78
 -10 -14   0   -1.42    4.85
 -11 -14   0   -4.39    5.24
 -12 -14   0   -8.74    5.27
   0 -15   0   -2.52    3.11
   1 -15   0   21.67    3.58
  -1 -15   0   21.34    4.00
   2 -15   0   20.73    3.32
  -2 -15   0   15.41    3.95
  -3 -15   0    1.43    3.72
   3 -15   0    0.13    2.45
  -4 -15   0   26.06    4.66
  -5 -15   0    9.38    4.36
  -6 -15   0   16.00    4.70
  -7 -15   0   -1.01    4.35
  -8 -15   0   26.07    5.46
  -9 -15   0    2.48    4.97
 -10 -15   0   -3.95    5.19
 -11 -15   0   -3.65    5.40
   0 -16   0    5.32    3.56
  -1 -16   0    5.74    3.77
   1 -16   0    7.04    3.35
  -2 -16   0    2.71    3.79
  -3 -16   0   -7.05    3.68
  -4 -16   0   -1.96    4.04
  -5 -16   0   -3.22    4.06
  -6 -16   0   -0.12    4.34
  -7 -16   0   -2.13    4.47
  -8 -16   0   -3.49    4.70
  -9 -16   0   -3.99    5.00
 -10 -16   0    3.93    5.51
   0 -17   0   -1.87    3.43
  -1 -17   0   31.77    4.61
  -2 -17   0    2.65    4.02
  -3 -17   0    2.40    4.19
  -4 -17   0   12.21    4.72
  -5 -17   0   -1.70    4.36
  -6 -17   0    7.09    4.86
  -7 -17   0    0.13    4.88
  -8 -17   0   -8.05    4.86
  -2 -18   0    1.96    4.10
  -3 -18   0   -8.16    3.92
  -4 -18   0   -3.78    4.34
  -5 -18   0  -11.07    4.05
 -19   0   1    4.93    5.01
 -18   0   1   -0.61    4.57
 -17   0   1   -5.68    4.38
 -16   0   1    4.16    4.32
 -15   0   1    1.80    4.03
 -14   0   1   -3.38    3.78
 -13   0   1    0.84    3.54
 -12   0   1    3.25    3.29
  12   0  -1   -2.40    3.05
  11   0  -1   -1.70    2.79
 -11   0   1    3.55    2.91
  10   0  -1    1.52    2.70
 -10   0   1    0.74    2.69
   9   0  -1    3.04    2.46
  -9   0   1   -3.95    2.39
  -8   0   1    2.59    2.34
   8   0  -1    0.12    2.32
   7   0  -1   -1.03    2.04
  -7   0   1    1.77    2.05
  -6   0   1   -0.21    1.81
   6   0  -1   -0.28    1.93
  -5   0   1    1.40    1.86
   5   0  -1    2.06    1.91
  -4   0   1    1.68    1.81
   4   0  -1    1.98    1.90
   3   0  -1   -0.18    1.45
  -3   0   1   -0.14    1.22
   2   0  -1   -0.70    0.92
  -2   0   1   -1.42    0.76
  -1   0   1   -0.54    0.26
   1   0  -1   -0.71    0.59
   1   0  -1   -0.66    0.11
  -1   0   1   -0.61    0.13
   0   0   1   -0.73    0.12
   0   0   1   -0.61    0.26
   0   0  -1   -0.54    0.34
   1   0   1   -1.03    0.79
  -1   0  -1   -0.43    0.67
   2   0   1   -0.24    1.29
  -2   0  -1   -0.70    1.28
   3   0   1    0.33    1.92
  -3   0  -1   -0.61    1.96
  -4   0  -1   -2.45    1.93
   4   0   1    1.06    1.90
   5   0   1    2.81    1.96
  -5   0  -1   -0.13    1.95
   6   0   1   -0.06    2.01
  -6   0  -1    1.41    2.20
   7   0   1   -1.26    2.22
  -7   0  -1    2.72    2.49
   8   0   1    1.59    2.46
  -8   0  -1   -5.00    2.51
   9   0   1   -4.19    2.40
  -9   0  -1    1.53    2.74
  10   0   1    3.87    2.83
 -10   0  -1    2.13    2.94
 -11   0  -1   -1.86    3.18
  11   0   1   -3.01    2.80
 -12   0  -1    0.15    3.49
 -13   0  -1   -0.97    3.85
 -14   0  -1   -0.76    3.95
 -15   0  -1   -1.85    4.14
 -16   0  -1    5.70    4.61
 -17   0  -1    0.66    4.82
 -18   0  -1    3.65    5.12
 -19  -1   1   10.08    5.27
 -19   1   1   -0.04    4.84
 -18  -1   1   -3.55    4.72
 -18   1   1    7.22    4.74
 -17  -1   1    5.03    4.65
 -17   1   1    6.36    4.46
 -16  -1   1   13.29    4.67
 -16   1   1   18.10    4.59
 -15  -1   1    2.71    4.17
 -15   1   1    0.32    3.85
 -14  -1   1   10.97    4.25
 -14   1   1   21.70    4.19
  13  -1  -1    2.77    3.38
 -13  -1   1   -3.37    3.58
 -13   1   1   -0.40    3.34
  12  -1  -1   35.71    4.00
 -12  -1   1   33.00    4.18
 -12   1   1   34.33    3.94
  11  -1  -1   76.81    5.57
 -11  -1   1   68.25    5.62
 -11   1   1   72.56    5.52
  11   1  -1   71.97    6.23
  10  -1  -1   39.24    3.53
 -10  -1   1   38.39    3.82
  10   1  -1   37.81    3.79
 -10   1   1   38.58    3.55
   9  -1  -1   26.04    2.99
  -9  -1   1   24.63    3.25
   9   1  -1   25.80    3.22
  -9   1   1   23.29    3.02
   8  -1  -1   -1.13    2.13
  -8  -1   1   -2.97    2.42
   8   1  -1   -1.23    2.36
  -8   1   1    0.30    2.22
  -7  -1   1    7.91    2.32
   7  -1  -1    6.07    2.10
  -7   1   1    7.31    2.04
   7   1  -1    2.84    2.27
  -6  -1   1   63.65    4.16
   6  -1  -1   54.62    3.82
  -6   1   1   54.67    3.69
   6   1  -1   50.25    4.15
  -5  -1   1   20.31    2.39
   5  -1  -1   18.79    2.03
   5   1  -1   22.64    2.51
  -5   1   1   19.22    1.95
  -4  -1   1  276.36    9.51
   4  -1  -1  267.27    9.06
   4   1  -1  267.71    9.59
  -4   1   1  276.95    9.03
   3  -1  -1  620.90   19.40
  -3  -1   1  642.52   19.70
   3   1  -1  629.28   19.76
  -3   1   1  633.70   19.37
  -2  -1   1  131.19    4.76
   2   1  -1  136.22    4.84
   2   1  -1  132.50    3.87
  -1  -1   1  338.57    9.18
   1   1  -1  358.73    9.20
   0  -1  -1  107.78    3.11
   0   1   1  110.22    3.06
   0   1   1  105.67    3.67
  -1  -1  -1  237.05    7.76
   1  -1   1  242.94    7.65
  -2  -1  -1  122.27    4.87
   2  -1   1  122.38    4.70
   2   1   1  124.48    4.82
  -2   1  -1  120.94    4.73
   3  -1   1  185.13    6.94
  -3  -1  -1  196.52    7.40
   3   1   1  189.18    7.31
  -3   1  -1  195.17    7.05
   4  -1   1   30.62    2.38
  -4  -1  -1   29.12    2.72
  -4   1  -1   29.24    2.48
   4   1   1   36.56    2.78
  -5  -1  -1   81.27    4.52
   5  -1   1   86.73    4.41
  -5   1  -1   81.35    4.41
   5   1   1   83.60    4.82
   6  -1   1   27.77    2.61
  -6  -1  -1   30.09    3.00
   6   1   1   31.38    2.84
  -6   1  -1   24.69    2.64
   7  -1   1    4.91    2.24
  -7  -1  -1    5.17    2.63
   7   1   1    4.23    2.45
  -7   1  -1    0.53    2.36
  -8  -1  -1   45.69    4.02
   8  -1   1   53.44    4.56
   8   1   1   52.93    3.98
  -8   1  -1   58.83    4.73
  -9  -1  -1   40.39    3.89
   9  -1   1   38.44    3.52
   9   1   1   40.06    3.72
  -9   1  -1   39.52    3.61
  10  -1   1    0.20    2.66
 -10  -1  -1   -0.35    2.92
  10   1   1   -0.53    2.75
 -10   1  -1    0.09    2.80
  11  -1   1    2.63    2.87
 -11  -1  -1    0.69    3.30
 -11   1  -1    1.78    3.00
 -12  -1  -1    2.84    3.70
  12  -1   1    0.64    3.19
 -12   1  -1    0.27    3.38
 -13  -1  -1   10.26    4.22
 -13   1  -1   11.37    4.18
 -14  -1  -1    7.47    4.36
 -14   1  -1    2.51    4.12
 -15  -1  -1    9.22    4.58
 -15   1  -1   13.24    4.64
 -16  -1  -1    5.17    4.74
 -16   1  -1    1.50    4.47
 -17  -1  -1    5.75    5.04
 -17   1  -1    2.22    4.75
 -18  -1  -1   -3.47    5.15
 -18   1  -1    3.16    5.04
 -19  -2   1   -5.31    5.03
 -19   2   1    1.17    4.50
 -18  -2   1    2.76    4.98
 -18   2   1    2.24    4.55
 -17  -2   1   -0.64    4.58
 -17   2   1   -1.09    4.11
 -16  -2   1    4.88    4.53
 -16   2   1    1.61    3.93
 -15  -2   1    7.30    4.46
 -15   2   1   10.94    3.95
 -14  -2   1    8.22    4.28
  14  -2  -1   15.13    3.89
 -14   2   1    7.90    3.74
  13  -2  -1   -5.00    3.14
 -13  -2   1   -1.22    3.71
 -13   2   1    2.70    3.31
  12  -2  -1    4.36    3.12
 -12  -2   1    6.98    3.66
 -12   2   1   11.88    3.22
 -11  -2   1    1.37    3.14
  11  -2  -1    3.73    2.71
 -11   2   1    6.25    2.80
  11   2  -1    5.91    3.14
  10  -2  -1   -3.79    2.31
 -10  -2   1   -0.89    2.84
  10   2  -1   -2.78    2.70
 -10   2   1   -1.32    2.41
   9  -2  -1    2.76    2.26
  -9  -2   1    1.42    2.72
   9   2  -1   -1.37    2.62
  -9   2   1    6.16    2.35
  -8  -2   1   39.50    3.78
   8  -2  -1   49.01    3.94
  -8   2   1   43.21    3.83
   8   2  -1   40.14    3.69
  -7  -2   1    5.40    2.49
   7  -2  -1    4.82    1.93
  -7   2   1    2.75    1.89
   7   2  -1   -0.96    2.33
  -6  -2   1    1.68    2.19
   6  -2  -1    0.74    1.62
  -6   2   1    1.59    1.55
   6   2  -1    0.43    2.09
   5  -2  -1   49.04    3.08
  -5  -2   1   51.12    4.11
   5   2  -1   50.69    4.35
  -5   2   1   47.94    2.98
   4  -2  -1   -0.10    1.36
  -4  -2   1    1.34    2.06
  -4   2   1    4.23    1.29
   4   2  -1   -0.76    2.11
  -3  -2   1  526.97   16.88
  -2  -2   1  348.33   10.75
  -2  -2   1  353.92   11.15
  -2  -2   1  340.50    9.08
   2   2  -1  335.52   10.79
   2   2  -1  336.52    9.12
  -1  -2   1   -0.29    1.23
  -1  -2   1    0.39    0.80
   1  -2  -1    0.23    0.84
  -1  -2   1    1.95    1.43
  -1   2   1    1.12    0.81
   1   2  -1   -0.92    1.44
   1   2  -1   -1.20    1.56
   0  -2  -1   37.81    1.72
   0  -2  -1   37.21    2.23
   0   2   1   39.07    1.68
   0   2   1   37.19    2.23
  -1  -2  -1   17.09    1.72
   1   2   1   17.95    1.73
   1   2   1   15.89    1.09
   2  -2   1  376.22   11.94
  -2  -2  -1  380.33   12.47
  -3  -2  -1   12.68    2.38
   3  -2   1   13.84    1.79
  -3   2  -1   11.34    1.97
   3   2   1   13.78    2.26
  -4  -2  -1   28.37    2.77
   4  -2   1   30.44    2.18
   4   2   1   28.39    2.68
  -4   2  -1   28.79    2.31
  -5  -2  -1   -0.48    2.10
   5  -2   1   -1.71    1.60
   5   2   1    0.92    2.01
  -5   2  -1    0.21    1.80
  -6  -2  -1    1.88    2.34
   6  -2   1    0.42    1.84
  -6   2  -1   -2.09    1.96
   6   2   1    1.40    2.22
  -7  -2  -1    1.28    2.77
   7  -2   1    0.59    2.10
   7   2   1   -1.19    2.40
  -7   2  -1   -0.36    2.27
   8  -2   1   -0.97    2.18
  -8  -2  -1    5.54    2.90
  -8   2  -1   -0.60    2.44
   8   2   1   -2.81    2.49
  -9  -2  -1   13.51    3.30
   9  -2   1   11.57    2.68
  -9   2  -1   13.23    2.98
   9   2   1   14.17    3.07
  10  -2   1    2.27    2.63
 -10  -2  -1    1.72    3.19
 -10   2  -1    1.77    2.91
  11  -2   1    0.37    2.77
 -11  -2  -1    2.16    3.49
 -11   2  -1   -2.30    3.11
  12  -2   1   -1.68    3.08
 -12  -2  -1   -2.46    3.66
 -12   2  -1    0.51    3.43
 -13  -2  -1    4.26    4.20
 -13   2  -1    3.17    3.90
 -14  -2  -1    3.71    4.34
 -14   2  -1   -1.71    3.89
 -15  -2  -1    6.19    4.54
 -15   2  -1   -1.39    4.12
 -16  -2  -1    2.26    4.63
 -16   2  -1   -3.53    4.23
 -17  -2  -1   -1.85    4.89
 -17   2  -1    9.35    4.62
 -18  -2  -1    4.25    5.33
 -18   2  -1    7.17    4.70
 -19  -3   1   11.31    5.64
 -18  -3   1   14.39    5.39
 -18   3   1   17.14    4.70
 -17  -3   1   -4.28    4.63
 -17   3   1    4.44    4.08
 -16  -3   1   11.25    4.84
 -16   3   1   14.45    4.33
 -15  -3   1   10.18    4.64
 -15   3   1   18.79    3.94
 -14  -3   1   52.35    5.67
  14  -3  -1   55.44    4.97
 -14   3   1   62.57    5.80
  13  -3  -1    0.69    3.15
 -13  -3   1    2.10    3.95
 -13   3   1   -1.68    3.16
 -12  -3   1   13.33    3.91
  12  -3  -1   13.74    3.15
 -12   3   1   11.72    3.13
 -11  -3   1   27.58    4.01
  11  -3  -1   24.64    3.11
 -11   3   1   22.67    3.13
  10  -3  -1    1.67    2.30
 -10  -3   1   -1.19    2.88
  10   3  -1   -3.20    2.81
 -10   3   1    1.86    2.31
   9  -3  -1  151.24    6.57
  -9  -3   1  156.13    7.62
  -9   3   1  162.54    6.55
   9   3  -1  152.60    7.83
  -8  -3   1  145.58    7.10
   8  -3  -1  133.18    5.88
   8   3  -1  135.33    7.14
  -8   3   1  137.98    5.82
   7  -3  -1   25.53    2.29
  -7  -3   1   20.46    3.02
   7   3  -1   28.70    3.22
  -7   3   1   28.64    2.27
  -6  -3   1   10.26    2.56
   6  -3  -1    7.79    1.60
   6   3  -1    9.87    2.46
  -6   3   1    9.07    1.56
   5  -3  -1    0.47    1.24
  -5  -3   1    1.27    2.05
  -5   3   1    0.48    1.12
   5   3  -1   -1.78    2.09
  -3  -3   1   25.45    2.58
   3   3  -1   27.03    2.83
   3   3  -1   26.24    1.73
   3   3  -1   23.66    2.38
  -2  -3   1  652.41   19.54
  -2  -3   1  666.70   20.50
  -2  -3   1  650.22   16.89
   2   3  -1  643.71   19.61
   2   3  -1  637.14   20.51
   2   3  -1  638.72   16.92
  -1  -3   1    5.18    1.82
  -1  -3   1    0.51    1.94
   1  -3  -1    4.78    1.11
   1  -3  -1    7.29    1.31
   1   3  -1    0.52    1.90
   1   3  -1   -0.03    2.16
  -1   3   1    5.93    1.26
   0  -3   1    4.74    1.76
   0  -3  -1    9.43    1.73
   0  -3  -1    9.54    1.12
   0   3   1    9.67    1.70
  -1  -3  -1  261.01    7.03
  -1  -3  -1  256.66    9.03
   1   3   1  261.99    8.94
   1   3   1  256.33    6.98
  -2  -3  -1   16.66    2.40
   2   3   1   19.24    2.30
   2   3   1   15.11    1.36
   3  -3   1   32.07    2.00
  -3  -3  -1   37.76    2.93
   4  -3   1   37.19    2.80
  -4  -3  -1   37.14    3.09
  -4   3  -1   35.36    3.08
   5  -3   1   20.39    1.93
  -5  -3  -1   19.42    2.74
   5   3   1   13.87    2.57
  -5   3  -1   17.87    2.12
  -6  -3  -1  161.49    7.47
   6  -3   1  156.76    6.22
  -6   3  -1  168.07    6.56
   6   3   1  161.64    7.11
  -7  -3  -1    0.92    2.82
   7  -3   1    1.74    1.99
  -7   3  -1    0.73    2.20
   7   3   1    2.03    2.57
  -8  -3  -1  147.96    7.42
   8  -3   1  142.44    6.35
   8   3   1  137.49    7.42
  -8   3  -1  147.56    6.48
  -9  -3  -1   43.82    4.27
   9  -3   1   45.37    3.46
   9   3   1   42.88    4.06
  -9   3  -1   50.07    4.54
 -10  -3  -1    0.05    3.30
  10  -3   1    3.00    2.50
 -10   3  -1    3.73    2.86
  11  -3   1    1.27    2.73
 -11  -3  -1    3.05    3.62
 -11   3  -1    1.42    3.12
 -12  -3  -1   10.11    4.21
  12  -3   1   10.03    3.25
 -12   3  -1   12.01    3.64
 -13  -3  -1    1.86    4.26
  13  -3   1    0.08    3.27
 -13   3  -1   -4.25    3.51
 -14  -3  -1    6.39    4.56
 -14   3  -1    0.68    3.70
 -15  -3  -1    3.10    4.64
 -15   3  -1    4.61    3.94
 -16  -3  -1    5.85    4.88
 -16   3  -1    9.26    4.37
 -17  -3  -1    1.25    5.06
 -17   3  -1    5.12    4.38
 -18  -3  -1    2.42    5.46
 -18   3  -1    5.44    4.74
 -19  -4   1   -0.45    5.54
 -18  -4   1    0.92    5.17
 -17  -4   1    2.43    4.88
 -17   4   1    3.98    3.79
 -16  -4   1    0.41    4.68
 -16   4   1    4.73    3.78
  15  -4  -1    4.23    3.62
 -15  -4   1    5.76    4.72
 -15   4   1   10.89    3.83
 -14  -4   1   -1.39    4.24
  14  -4  -1    0.01    3.24
 -14   4   1   -1.20    3.25
  13  -4  -1   -0.12    3.07
 -13  -4   1    3.57    4.10
 -13   4   1    1.56    3.11
 -12  -4   1   -2.83    3.59
  12  -4  -1    1.01    2.75
 -12   4   1    0.00    2.81
  11  -4  -1   29.47    3.19
 -11  -4   1   28.92    4.20
 -11   4   1   29.89    3.22
 -10  -4   1   17.43    3.70
  10  -4  -1   19.41    2.64
 -10   4   1   20.99    2.68
  -9  -4   1    7.80    3.13
   9  -4  -1    8.33    2.11
  -9   4   1    9.44    2.17
   9   4  -1    4.06    2.88
   8  -4  -1   17.19    2.11
  -8  -4   1   18.31    3.28
   8   4  -1   18.31    3.25
  -8   4   1   16.57    2.15
   7  -4  -1   76.85    3.71
  -7  -4   1   78.36    5.53
  -7   4   1   72.83    3.76
   7   4  -1   70.18    5.63
  -6  -4   1   14.25    2.77
  -6   4   1    8.70    1.41
   6   4  -1   12.08    2.62
  -5  -4   1   31.04    3.02
  -4  -4   1   31.99    2.91
   4   4  -1   36.12    3.09
   4   4  -1   31.96    1.84
  -3  -4   1   36.25    2.91
   3   4  -1   34.72    2.88
   3   4  -1   35.82    3.09
  -2  -4   1   94.08    4.86
   2  -4  -1   89.91    3.55
  -2  -4   1  102.48    4.72
   2   4  -1  102.28    5.11
   2   4  -1   89.25    5.19
  -2   4   1   92.98    3.61
  -1  -4   1    4.45    1.97
  -1  -4   1    4.05    2.13
   1  -4  -1    5.41    1.45
   1  -4  -1    5.04    1.47
  -1   4   1    3.53    1.43
   1   4  -1   -0.23    2.03
   0  -4   1    5.68    1.73
   0  -4  -1   10.18    1.86
   0   4   1    9.31    1.83
   0   4   1    7.35    1.77
  -1  -4  -1    6.67    1.00
  -1  -4  -1    7.70    2.05
   1   4   1    6.38    1.95
  -2  -4  -1    2.21    1.97
   2   4   1    2.07    1.81
  -3  -4  -1   -0.09    2.04
   3  -4   1    1.67    1.11
   3   4   1   -0.60    1.49
   4  -4   1   10.04    1.47
  -4  -4  -1   16.65    2.60
  -5  -4  -1   25.83    3.08
   5  -4   1   30.44    2.69
   6  -4   1   22.32    2.08
  -6  -4  -1   19.69    3.14
   6   4   1   21.17    3.02
  -6   4  -1   16.77    2.30
   7  -4   1   40.75    3.49
  -7  -4  -1   33.34    3.82
  -7   4  -1   35.42    2.98
   7   4   1   30.87    3.48
   8  -4   1    3.32    2.00
  -8  -4  -1    3.49    2.99
  -8   4  -1   -1.47    2.28
   8   4   1   -0.78    2.59
  -9  -4  -1   33.50    4.21
   9  -4   1   39.86    3.13
  -9   4  -1   36.01    3.34
  10  -4   1   -2.48    2.38
 -10  -4  -1    1.60    3.45
 -10   4  -1    6.09    2.84
  11  -4   1   13.97    2.96
 -11  -4  -1   18.08    4.23
 -11   4  -1   15.77    3.33
 -12  -4  -1    1.54    4.11
  12  -4   1   -2.49    2.92
 -12   4  -1   -1.00    3.24
  13  -4   1   16.80    3.56
 -13  -4  -1   18.09    4.81
 -13   4  -1   10.34    3.76
  14  -4   1    3.13    3.37
 -14  -4  -1    4.28    4.56
 -14   4  -1    5.02    3.72
 -15  -4  -1    7.42    4.95
 -15   4  -1    5.67    3.86
 -16  -4  -1   -0.42    4.79
 -16   4  -1    6.86    4.13
 -17  -4  -1   -0.41    5.17
 -17   4  -1    5.22    4.29
 -18  -4  -1    6.92    5.61
 -19  -5   1    9.99    5.79
 -18  -5   1    4.95    5.44
 -17  -5   1    1.93    5.10
 -16  -5   1   -3.66    4.78
 -16   5   1    3.92    3.49
 -15  -5   1   -0.48    4.52
 -15   5   1    3.21    3.33
 -14  -5   1   22.43    5.03
  14  -5  -1   28.11    3.76
 -14   5   1   30.42    3.75
 -13  -5   1    3.65    4.27
  13  -5  -1    4.25    3.05
 -13   5   1   10.17    3.06
 -12  -5   1   22.28    4.49
  12  -5  -1   21.55    3.12
 -12   5   1   26.44    3.17
  11  -5  -1   21.65    2.81
 -11  -5   1   22.93    4.22
 -11   5   1   23.38    2.83
 -10  -5   1    3.96    3.45
  10  -5  -1    3.54    2.13
 -10   5   1    7.41    2.21
  -9  -5   1   39.99    4.27
   9  -5  -1   41.67    3.43
  -9   5   1   43.52    3.49
  -8  -5   1    5.13    2.99
  -8   5   1   10.80    1.81
   8   5  -1   10.98    3.03
  -7  -5   1   16.85    3.10
   7   5  -1    3.34    1.92
  -6  -5   1  190.58    8.24
   6   5  -1  195.36    8.57
  -5  -5   1   39.73    3.45
   5   5  -1   42.77    3.75
   5   5  -1   38.95    2.09
   5   5  -1   40.90    3.44
  -4  -5   1   39.05    3.27
   4   5  -1   42.13    3.26
  -3  -5   1   88.99    5.03
   3   5  -1   76.27    4.77
  -2  -5   1   48.18    3.82
  -2  -5   1   43.88    3.59
   2  -5  -1   41.04    2.78
   2  -5  -1   43.04    2.53
   2   5  -1   48.00    4.11
   2   5  -1   46.89    3.49
  -2   5   1   46.77    2.78
  -1  -5   1    8.08    1.91
   1  -5  -1    7.33    1.54
   1  -5  -1    5.00    1.52
  -1  -5   1    5.14    2.14
   1   5  -1    7.12    2.08
  -1   5   1    4.79    1.55
   0  -5  -1    1.61    1.75
   0  -5   1    3.69    2.21
   0  -5   1    0.13    1.67
   0   5   1    1.14    1.75
   0   5   1   -1.12    1.65
   1  -5   1   21.84    1.99
  -1  -5  -1   24.97    2.42
   1   5   1   19.52    2.21
   1   5   1   22.99    2.37
  -2  -5  -1   48.15    4.28
   2   5   1   37.89    2.87
  -3  -5  -1    9.34    2.35
   3   5   1   -1.34    1.43
   4  -5   1   46.09    2.68
  -4  -5  -1   56.00    4.90
   4   5   1   53.59    4.29
   5  -5   1    0.11    1.34
  -5  -5  -1    1.84    2.69
   5   5   1    0.23    2.13
   6  -5   1   44.47    3.12
  -6  -5  -1   56.09    5.04
  -7  -5  -1   -2.09    2.84
   7  -5   1    0.02    1.65
   7   5   1   -0.93    2.32
   8  -5   1    1.89    1.84
  -8  -5  -1    0.73    3.10
  -8   5  -1    2.38    2.18
  -9  -5  -1   73.92    6.37
   9  -5   1   55.47    4.21
  -9   5  -1   63.42    4.67
 -10  -5  -1   10.49    3.88
  10  -5   1    8.22    2.48
 -10   5  -1   17.43    3.05
 -11  -5  -1   37.68    5.00
  11  -5   1   36.76    3.45
 -11   5  -1   36.06    3.79
  12  -5   1   21.40    3.35
 -12  -5  -1   16.18    4.63
 -12   5  -1   27.90    3.77
  13  -5   1   12.08    3.32
 -13  -5  -1   10.29    4.67
 -13   5  -1   11.49    3.57
 -14  -5  -1    3.18    4.62
 -14   5  -1   13.36    3.68
 -15  -5  -1   -0.42    4.69
 -15   5  -1    4.55    3.66
 -16  -5  -1    1.20    5.13
 -16   5  -1    6.48    3.90
 -17  -5  -1   -5.99    5.01
 -18  -5  -1    7.52    5.84
 -18  -6   1    5.15    5.64
 -17  -6   1    2.37    5.27
 -16  -6   1  -12.40    4.72
 -15  -6   1   -3.11    4.54
 -15   6   1    6.02    3.04
 -14  -6   1    1.20    4.45
 -14   6   1    6.25    2.92
 -13  -6   1    2.66    4.28
  13  -6  -1    9.86    2.78
 -13   6   1    4.71    2.69
  12  -6  -1    2.88    2.45
 -12  -6   1    4.17    4.06
 -12   6   1    3.43    2.53
 -11  -6   1    2.80    3.76
  11  -6  -1    3.14    2.16
 -11   6   1    7.68    2.31
 -10  -6   1    0.20    3.33
 -10   6   1    1.21    1.86
  -9  -6   1    6.73    3.37
  -8  -6   1   68.13    5.97
  -7  -6   1   77.00    5.95
   7   6  -1   69.72    3.08
   7   6  -1   64.13    4.91
  -6  -6   1   16.90    3.14
   6   6  -1   16.41    3.34
   6   6  -1   16.53    3.00
   6   6  -1   14.10    1.27
  -5  -6   1   76.20    5.47
   5   6  -1   70.26    5.25
   5   6  -1   67.22    5.51
  -4  -6   1    3.86    2.53
   4   6  -1    3.29    2.46
   4   6  -1    5.52    2.67
  -3  -6   1   28.07    2.90
   3  -6  -1   23.60    1.55
   3   6  -1   24.04    2.77
   2  -6  -1    6.29    1.44
  -2  -6   1    4.67    2.20
   2  -6  -1   10.35    1.78
  -2  -6   1    9.40    2.36
   2   6  -1   10.93    2.64
   2   6  -1    4.96    2.00
  -2   6   1    9.37    1.62
   1  -6  -1    7.39    1.61
  -1  -6   1    2.81    2.12
   1  -6  -1    6.78    1.75
  -1  -6   1   12.50    2.02
   1   6  -1    5.90    2.14
  -1   6   1    8.22    1.77
   0  -6   1    1.00    2.23
   0  -6   1    0.40    1.60
   0  -6  -1    3.41    1.79
   0   6   1   -1.64    2.01
   0   6   1    0.46    1.73
   1  -6   1   36.10    2.52
  -1  -6  -1   41.08    3.08
  -1  -6  -1   36.09    2.04
   1   6   1   38.29    3.03
   1   6   1   44.22    3.70
   2  -6   1    0.60    1.54
  -2  -6  -1   -1.52    2.15
   2   6   1    0.65    2.04
   2   6   1   -2.05    1.29
  -3  -6  -1   15.13    2.79
   3  -6   1   16.66    1.82
   3   6   1   17.07    2.66
  -4  -6  -1   28.75    3.35
   4  -6   1   38.30    2.35
   4   6   1   31.90    3.31
  -5  -6  -1    1.49    2.83
   5  -6   1   -4.10    1.24
   5   6   1    1.96    2.49
  -6  -6  -1    9.63    3.09
   6   6   1    9.37    2.76
  -7  -6  -1    1.20    2.99
   7  -6   1    0.55    1.49
   7   6   1   -1.70    1.16
  -8  -6  -1    0.08    3.21
   8  -6   1   -0.77    1.67
   9  -6   1   14.47    2.19
  -9  -6  -1   14.60    3.86
  10  -6   1   -0.51    2.14
 -10  -6  -1    2.60    3.66
  11  -6   1    8.54    2.66
 -11  -6  -1    9.93    4.36
  12  -6   1   26.11    3.26
 -12  -6  -1   26.26    5.13
 -12   6  -1   23.85    3.42
 -13  -6  -1   11.36    4.77
 -13   6  -1   11.23    3.23
 -14  -6  -1   12.20    5.03
 -14   6  -1   11.86    3.41
 -15  -6  -1    4.33    5.10
 -15   6  -1    9.52    3.49
 -16  -6  -1   -6.62    5.15
 -17  -6  -1    1.91    5.54
 -18  -7   1    3.92    5.77
 -17  -7   1    1.33    5.49
 -16  -7   1   -1.61    5.30
 -15  -7   1    3.75    5.08
 -14  -7   1    0.46    4.51
 -13  -7   1   13.79    4.81
 -12  -7   1   14.12    4.60
 -11  -7   1    3.15    3.98
 -10  -7   1    1.91    3.59
  -9  -7   1   19.22    3.87
   9   7  -1   20.01    1.89
  -8  -7   1   14.36    3.64
   8   7  -1   13.73    1.53
  -7  -7   1   84.16    6.41
   7   7  -1   91.10    6.47
  -6  -7   1   73.23    5.79
   6   7  -1   80.10    6.15
  -5  -7   1   39.20    3.82
   5   7  -1   32.88    3.92
   5   7  -1   32.65    3.68
  -4  -7   1   27.48    3.24
   4   7  -1   27.71    3.41
   4   7  -1   25.18    3.55
   3  -7  -1   42.53    2.81
  -3  -7   1   51.60    4.73
   3   7  -1   52.19    3.93
   3   7  -1   53.96    4.27
   2  -7  -1    1.49    1.56
  -2  -7   1    2.04    2.27
   2  -7  -1    2.89    1.82
  -2  -7   1   -0.45    2.25
   2   7  -1    3.39    2.16
   2   7  -1    0.79    1.78
  -2   7   1    3.71    1.78
  -1  -7   1    3.15    2.36
  -1  -7   1    7.55    2.14
   1  -7  -1    8.01    1.85
   1   7  -1    7.38    2.22
  -1   7   1    2.30    1.91
   0  -7   1   38.53    3.39
   0  -7   1   38.04    3.46
   0  -7  -1   48.83    3.85
   0   7   1   31.39    3.08
   0   7   1   39.12    3.60
   1  -7   1   -1.01    1.79
  -1  -7  -1    1.59    2.18
  -1  -7  -1    0.34    1.10
   1   7   1   -0.50    1.32
   1   7   1    1.29    2.19
   2  -7   1   30.35    2.40
  -2  -7  -1   33.03    3.25
   2   7   1   26.42    2.92
   3  -7   1    9.87    1.76
  -3  -7  -1   12.30    2.84
   3   7   1   14.07    2.70
   3   7   1    8.28    2.65
  -4  -7  -1   91.53    6.10
   4  -7   1   89.75    3.91
   4   7   1   94.79    5.80
   4   7   1   93.32    5.88
  -5  -7  -1    8.41    3.08
   5   7   1   13.14    2.95
  -6  -7  -1   20.37    3.56
   6   7   1   23.48    3.36
  -7  -7  -1    9.48    3.43
  -8  -7  -1    4.50    3.49
  -9  -7  -1   -2.16    3.53
   9  -7   1   -0.11    1.71
 -10  -7  -1    2.87    4.02
  10  -7   1   -1.34    1.95
 -11  -7  -1   31.25    5.25
  11  -7   1   43.95    3.15
 -12  -7  -1    7.78    4.54
  12  -7   1    3.05    2.50
 -13  -7  -1   10.34    4.90
 -14  -7  -1    9.95    5.02
 -15  -7  -1   -5.03    4.90
 -16  -7  -1    7.39    5.69
 -17  -7  -1   -9.14    5.36
 -17  -8   1    6.49    5.75
 -16  -8   1    1.58    5.37
 -15  -8   1    4.11    5.15
 -14  -8   1   -0.79    4.73
 -13  -8   1   -0.36    4.36
 -12  -8   1    7.59    4.48
  12   8  -1    3.79    1.94
 -11  -8   1   -4.55    3.87
  11   8  -1   -1.66    1.63
 -10  -8   1    1.96    3.82
  10   8  -1    0.53    1.61
  -9  -8   1   -0.17    3.64
   9   8  -1    1.00    1.39
  -8  -8   1   16.69    3.83
  -7  -8   1   10.33    3.42
  -6  -8   1   12.02    3.22
   6   8  -1    5.74    2.98
  -5  -8   1    2.43    2.71
   5   8  -1    2.73    2.75
  -4  -8   1    1.37    2.66
   4   8  -1    4.79    2.78
   4   8  -1    3.86    2.95
  -3  -8   1    5.48    2.66
   3  -8  -1    4.88    2.06
   3  -8  -1    4.87    1.54
   3   8  -1    4.89    2.65
   3   8  -1    8.48    3.13
   2  -8  -1    3.98    1.94
  -2  -8   1    1.45    2.52
   2  -8  -1    2.89    1.73
  -2  -8   1    6.23    2.56
  -2   8   1    5.35    1.96
   2   8  -1    4.36    2.58
  -1  -8   1   20.99    3.07
   1  -8  -1   27.14    2.47
  -1  -8   1   26.81    2.79
  -1   8   1   19.45    2.44
   0  -8   1    2.72    2.02
   0  -8  -1    2.94    2.14
   0  -8   1   -1.63    2.43
   0   8   1   -2.49    1.30
  -1  -8  -1    2.37    2.38
   1  -8   1    1.65    1.89
  -1  -8  -1    2.05    1.22
   1  -8   1    6.70    2.70
   1   8   1    2.59    2.24
   1   8   1    3.39    2.45
   2  -8   1   54.00    3.74
  -2  -8  -1   57.74    5.16
   2   8   1   55.90    3.97
   3  -8   1    4.59    1.70
  -3  -8  -1    4.81    2.76
   3   8   1    8.09    2.60
   3   8   1    8.42    2.90
  -4  -8  -1    2.51    2.83
   4  -8   1    0.65    1.46
   4   8   1   -1.63    2.51
   4   8   1   -1.54    2.67
  -5  -8  -1   10.66    3.16
   5   8   1   12.32    3.05
  -6  -8  -1    2.31    3.10
  -7  -8  -1    9.89    3.61
  -8  -8  -1   17.19    4.10
  -9  -8  -1    6.91    4.03
 -10  -8  -1   -1.83    4.18
 -11  -8  -1   -5.82    4.28
 -12  -8  -1    5.20    4.66
 -13  -8  -1    4.81    4.86
 -14  -8  -1    3.70    5.02
 -15  -8  -1    7.52    5.44
 -16  -8  -1   -4.42    5.31
 -17  -8  -1   -0.32    5.82
 -17  -9   1   -1.69    5.65
 -16  -9   1   -3.32    5.41
 -15  -9   1  -10.77    4.76
 -14  -9   1   -0.61    4.89
 -13  -9   1   -2.18    4.48
 -12  -9   1    2.84    4.42
 -11  -9   1    0.68    4.20
  11   9  -1    2.17    1.62
 -10  -9   1    6.63    4.12
  -9  -9   1   13.73    4.30
  -8  -9   1   13.89    4.02
  -7  -9   1    4.68    3.41
  -6  -9   1   19.43    3.69
  -5  -9   1    2.34    2.91
   5   9  -1    4.97    2.97
  -4  -9   1    9.52    2.98
   4  -9  -1    6.25    2.16
   4   9  -1   11.28    3.19
  -3  -9   1    7.18    2.78
   3  -9  -1    5.28    2.07
   3  -9  -1    6.59    1.73
   3   9  -1   14.25    3.10
   3   9  -1   12.70    3.41
   2  -9  -1   -1.50    1.93
  -2  -9   1    2.34    2.44
   2  -9  -1    0.38    1.85
  -2   9   1   -0.21    1.94
   2   9  -1   -0.20    2.49
  -1  -9   1   25.13    2.87
   1  -9  -1   28.39    2.65
  -1  -9   1   15.27    2.98
  -1   9   1   14.48    2.27
   1   9  -1   30.79    3.36
   0  -9   1   -1.14    2.43
   0  -9   1    0.48    2.00
   0  -9  -1    2.75    2.26
   0   9   1    3.88    2.27
  -1  -9  -1   39.65    2.50
   1  -9   1   43.70    3.80
   1  -9   1   38.89    3.02
  -1  -9  -1   43.30    3.54
   1   9   1   38.79    3.51
   2  -9   1   49.72    3.74
   2  -9   1   45.04    3.86
  -2  -9  -1   45.58    3.86
   2   9   1   53.22    4.20
   2   9   1   45.46    3.84
  -3  -9  -1    9.27    2.98
   3  -9   1    8.01    1.91
   3   9   1    8.08    3.03
   3   9   1   12.53    2.94
  -4  -9  -1   26.13    3.66
   4  -9   1   29.91    2.78
   4   9   1   28.55    3.65
  -5  -9  -1    7.09    3.26
  -6  -9  -1    6.33    3.44
  -7  -9  -1    2.52    3.61
  -8  -9  -1   31.14    4.75
  -9  -9  -1    6.90    4.28
 -10  -9  -1   10.42    4.58
 -11  -9  -1    2.18    4.56
 -12  -9  -1   -0.86    4.56
 -13  -9  -1   -0.74    4.87
 -14  -9  -1    0.96    5.07
 -15  -9  -1   -0.75    5.27
 -16  -9  -1    4.32    5.83
 -16 -10   1   -2.91    5.65
 -15 -10   1   -0.33    5.36
 -14 -10   1   -7.30    4.83
 -13 -10   1    4.10    4.96
 -12 -10   1   -1.09    4.53
 -11 -10   1    4.20    4.48
 -10 -10   1    1.21    4.09
  -9 -10   1    5.06    4.16
  -8 -10   1   -2.12    3.69
  -7 -10   1    0.47    3.67
  -6 -10   1   -0.26    3.29
  -5 -10   1   -2.48    3.02
   4 -10  -1    1.64    2.10
  -4 -10   1    0.25    2.81
   4 -10  -1    1.47    1.47
   4  10  -1    1.67    3.01
   3 -10  -1    2.49    1.79
   3 -10  -1    3.33    2.15
  -3 -10   1    2.00    2.76
   3  10  -1    3.73    2.94
   2 -10  -1   15.37    2.29
  -2 -10   1   13.26    3.01
   2  10  -1   16.42    3.31
  -2  10   1   14.16    2.40
  -1 -10   1    3.84    2.70
  -1 -10   1   12.49    2.71
   1 -10  -1   10.38    2.37
  -1  10   1    4.90    2.02
   0 -10   1   88.57    5.39
   0 -10  -1   95.06    5.39
   0 -10   1   89.02    5.41
   0  10   1   99.27    5.74
  -1 -10  -1    2.11    1.34
   1 -10   1   -3.22    2.06
   1 -10   1    3.19    2.70
  -1 -10  -1    4.25    2.69
   1  10   1    0.12    2.61
   2 -10   1   -0.23    2.64
  -2 -10  -1    4.65    2.82
   2 -10   1    0.76    2.06
   2  10   1   -0.60    2.56
   2  10   1    3.90    3.05
  -3 -10  -1   16.00    3.41
   3 -10   1   13.83    2.18
   3  10   1   15.07    3.52
   3  10   1   13.02    3.20
  -4 -10  -1    5.07    3.24
   4 -10   1    0.95    1.71
  -5 -10  -1    7.65    3.50
  -6 -10  -1   10.31    3.84
  -7 -10  -1   47.26    5.28
  -8 -10  -1   25.52    4.84
  -9 -10  -1   -1.07    4.16
 -10 -10  -1   -5.42    4.32
 -11 -10  -1   -4.86    4.41
 -12 -10  -1    5.25    4.88
 -13 -10  -1    5.51    5.27
 -14 -10  -1   -2.08    5.16
 -15 -10  -1    5.67    5.74
 -16 -11   1   -0.52    5.88
 -15 -11   1  -12.50    5.25
 -14 -11   1   -2.03    5.28
 -13 -11   1   -0.99    5.02
 -12 -11   1    1.30    4.71
 -11 -11   1    0.60    4.55
 -10 -11   1   -1.76    4.29
  -9 -11   1   -2.86    4.06
  -8 -11   1    9.62    4.42
  -7 -11   1   -0.17    3.79
  -6 -11   1    2.09    3.65
   5 -11  -1    3.03    2.30
  -5 -11   1   -0.79    3.27
   4 -11  -1   22.96    2.74
  -4 -11   1   29.71    4.03
   4 -11  -1   24.20    2.16
   3 -11  -1    0.64    2.19
  -3 -11   1    2.08    2.93
   3 -11  -1    2.18    1.98
   3  11  -1    3.35    3.07
   2 -11  -1   11.39    2.37
  -2 -11   1    9.08    2.99
   2  11  -1   11.53    3.25
   1 -11  -1    7.22    2.51
  -1 -11   1    2.48    2.65
  -1  11   1    4.81    2.60
   0 -11  -1    3.45    2.62
   0 -11   1   -1.00    2.39
   0 -11   1   -0.35    2.72
   0 -11  -1    2.35    1.69
   0  11   1    0.88    2.63
   1 -11   1   28.76    3.55
   1 -11   1   17.71    2.78
  -1 -11  -1   17.99    3.26
  -1 -11  -1   22.39    1.84
   1  11   1   23.46    3.41
   2 -11   1   -2.31    2.13
  -2 -11  -1   -0.86    2.91
   2 -11   1   -2.12    2.71
   2  11   1    1.02    3.24
   2  11   1    0.30    2.95
  -3 -11  -1   13.78    3.49
   3 -11   1   10.65    3.12
   3 -11   1    9.52    2.25
  -4 -11  -1    2.39    3.39
   4 -11   1    1.07    1.84
  -5 -11  -1    9.26    3.82
  -6 -11  -1   -5.22    3.60
  -7 -11  -1    4.04    4.09
  -8 -11  -1   19.41    4.80
  -9 -11  -1   12.70    4.76
 -10 -11  -1    0.39    4.64
 -11 -11  -1   -2.13    4.75
 -12 -11  -1    1.72    5.08
 -13 -11  -1    0.55    5.27
 -14 -11  -1   -1.28    5.30
 -15 -11  -1   -5.62    5.56
 -15 -12   1   -1.05    5.87
 -14 -12   1   -5.97    5.33
 -13 -12   1   14.18    5.74
 -12 -12   1   -8.22    4.75
 -11 -12   1    0.73    4.87
 -10 -12   1    9.05    4.74
  -9 -12   1    4.64    4.41
  -8 -12   1   11.86    4.49
  -7 -12   1   10.93    4.30
   6 -12  -1   -0.22    2.33
  -6 -12   1    1.28    3.85
  -5 -12   1    9.30    3.84
   5 -12  -1    6.08    2.38
   4 -12  -1    6.83    1.91
   4 -12  -1    4.16    2.34
  -4 -12   1    2.52    3.44
   3 -12  -1   23.57    2.67
  -3 -12   1   19.48    3.81
  -2 -12   1   55.88    4.69
   2 -12  -1   56.30    4.67
   2  12  -1   77.44    6.42
   1 -12  -1   36.53    3.58
  -1 -12   1   37.51    3.84
  -1  12   1   39.04    3.82
   0 -12  -1   61.61    3.78
   0 -12   1   54.32    4.57
   0 -12  -1   55.26    4.39
   0 -12   1   56.12    4.24
   0  12   1   65.97    5.77
  -1 -12  -1    4.83    3.06
   1 -12   1    1.31    2.90
  -1 -12  -1    3.27    1.61
   1 -12   1   -1.88    2.51
   1  12   1    0.27    3.11
   2 -12   1    0.49    2.91
   2 -12   1   -1.89    2.34
  -2 -12  -1    3.56    3.31
   3 -12   1    1.76    2.86
  -3 -12  -1    2.04    3.45
   3 -12   1   -2.47    2.20
   4 -12   1   -5.24    1.99
   4 -12   1    2.46    3.06
  -4 -12  -1    4.56    3.73
  -5 -12  -1    0.86    3.86
  -6 -12  -1    2.72    4.02
  -7 -12  -1   30.25    5.07
  -8 -12  -1    2.22    4.35
  -9 -12  -1   -4.34    4.36
 -10 -12  -1    6.54    4.95
 -11 -12  -1    0.88    4.96
 -12 -12  -1    6.35    5.40
 -13 -12  -1    4.38    5.50
 -14 -12  -1    0.95    5.64
 -14 -13   1   -8.55    5.50
 -13 -13   1   -6.69    5.29
 -12 -13   1   -2.26    5.10
 -11 -13   1    1.25    4.98
 -10 -13   1    0.59    4.59
  -9 -13   1   -5.68    4.27
  -8 -13   1    2.98    4.33
  -7 -13   1   -2.22    4.04
   7 -13  -1   -0.22    2.36
   6 -13  -1   -0.66    2.24
  -6 -13   1   -2.29    3.83
   5 -13  -1    8.34    2.42
  -5 -13   1    6.21    4.00
  -4 -13   1    7.59    3.85
   4 -13  -1    6.94    2.08
   3 -13  -1    3.62    2.33
  -3 -13   1    1.64    3.55
   2 -13  -1   14.21    2.91
  -2 -13   1    9.33    3.52
   1 -13  -1   -1.04    2.80
  -1 -13   1    1.21    3.03
   0 -13  -1    8.75    2.15
   0 -13  -1    8.09    3.17
   0 -13   1    7.30    3.02
   0  13   1   10.97    3.40
  -1 -13  -1    7.32    3.37
   1 -13   1    3.14    3.06
   1 -13   1   -0.55    2.75
   1  13   1    6.93    3.40
  -2 -13  -1    4.32    3.57
   2 -13   1    5.72    3.15
   2 -13   1   -2.86    2.57
   3 -13   1   43.36    3.51
  -3 -13  -1   46.27    4.87
   3 -13   1   47.90    4.26
   4 -13   1   -1.36    2.92
   4 -13   1   -3.06    2.08
  -4 -13  -1   -2.20    3.70
  -5 -13  -1   16.66    4.43
   5 -13   1   26.32    3.71
  -6 -13  -1    7.86    4.27
  -7 -13  -1    5.07    4.44
  -8 -13  -1    3.42    4.57
  -9 -13  -1   -5.71    4.49
 -10 -13  -1    1.12    4.94
 -11 -13  -1    2.65    5.10
 -12 -13  -1    7.83    5.65
 -13 -13  -1   -3.79    5.49
 -13 -14   1   -2.63    5.64
 -12 -14   1   -1.46    5.39
 -11 -14   1   -8.61    4.93
 -10 -14   1    5.06    5.01
  -9 -14   1   -0.77    4.51
  -8 -14   1   16.87    4.97
  -7 -14   1   12.63    4.62
  -6 -14   1    6.69    4.25
  -5 -14   1   22.51    4.62
   4 -14  -1    5.22    2.10
  -4 -14   1   -1.17    3.81
   3 -14  -1   27.66    3.05
  -3 -14   1   18.07    4.25
  -2 -14   1    0.40    3.38
   2 -14  -1    3.74    2.76
   1 -14  -1   -5.73    2.16
  -1 -14   1    1.60    3.22
   1 -14  -1    4.65    3.06
   0 -14   1   16.19    3.48
   0 -14  -1   14.00    2.33
   0 -14  -1   18.92    3.62
   0  14   1   26.10    3.81
  -1 -14  -1    5.74    3.46
   1 -14   1   -1.03    2.85
   2 -14   1   10.80    2.95
   2 -14   1   18.27    3.45
  -2 -14  -1   14.68    3.93
   3 -14   1   50.32    3.73
  -3 -14  -1   43.99    4.96
   3 -14   1   45.83    4.31
   4 -14   1   13.08    3.32
   4 -14   1    9.37    2.41
  -4 -14  -1   17.45    4.27
   5 -14   1   26.07    3.62
  -5 -14  -1   17.09    4.57
   6 -14   1   13.06    3.30
  -6 -14  -1    6.55    4.35
  -7 -14  -1    6.65    4.66
  -8 -14  -1   -2.58    4.54
  -9 -14  -1   -1.87    4.78
 -10 -14  -1    3.56    5.34
 -11 -14  -1   -0.23    5.23
 -12 -14  -1    3.29    5.64
 -11 -15   1   -3.98    5.24
 -10 -15   1    6.85    5.18
  -9 -15   1    0.69    4.84
  -8 -15   1   -5.34    4.28
  -7 -15   1   -3.28    4.19
  -6 -15   1   -3.40    4.07
  -5 -15   1   -6.20    3.89
  -4 -15   1    2.50    3.97
  -3 -15   1    0.78    3.61
   3 -15  -1   -0.10    2.42
  -2 -15   1    6.25    3.75
   2 -15  -1    9.20    2.98
   1 -15  -1   -0.06    2.99
  -1 -15   1   -1.00    3.25
   0 -15   1    1.63    3.20
   0 -15  -1    1.48    3.29
  -1 -15  -1   -2.97    3.38
   1 -15   1   -2.30    2.91
  -2 -15  -1   -6.31    3.41
   2 -15   1   -6.43    2.58
   3 -15   1   -2.29    2.87
  -3 -15  -1   -1.47    3.78
   3 -15   1   -6.62    2.44
  -4 -15  -1   -1.59    3.81
   4 -15   1    2.64    3.06
  -5 -15  -1   -3.28    3.97
  -6 -15  -1   -1.37    4.27
  -7 -15  -1    1.34    4.48
  -8 -15  -1    0.10    4.64
  -9 -15  -1   -5.74    4.72
 -10 -15  -1   -3.87    5.20
 -11 -15  -1    4.23    5.61
 -10 -16   1    8.43    5.56
  -9 -16   1   -1.87    4.77
  -8 -16   1   29.23    5.77
  -7 -16   1   14.44    4.87
  -6 -16   1    5.35    4.33
  -5 -16   1    8.05    4.32
  -4 -16   1   -6.43    3.72
  -3 -16   1   16.85    4.38
  -2 -16   1    1.31    3.70
   1 -16  -1   19.94    3.72
  -1 -16   1   18.31    3.96
   0 -16   1    9.00    3.53
   0 -16  -1    9.97    3.64
   1 -16   1    1.19    3.14
  -1 -16  -1    5.93    3.81
  -2 -16  -1    5.21    3.96
  -3 -16  -1   -6.01    3.72
  -4 -16  -1   -1.76    3.98
  -5 -16  -1   11.38    4.65
  -6 -16  -1    0.19    4.42
  -7 -16  -1   10.77    4.99
  -8 -16  -1   16.86    5.46
  -9 -16  -1    7.52    5.33
  -8 -17   1   -8.85    4.59
  -7 -17   1   -2.33    4.62
  -6 -17   1   -7.02    4.24
  -5 -17   1   -4.30    4.16
  -4 -17   1   -0.08    4.12
  -3 -17   1   -4.15    3.86
  -2 -17   1    4.75    4.06
  -1 -17   1   -4.47    3.54
   0 -17  -1    2.45    3.60
  -1 -17  -1   -1.73    3.72
  -2 -17  -1    0.73    3.88
  -3 -17  -1    3.15    4.15
  -4 -17  -1    3.96    4.36
  -5 -17  -1   -3.71    4.38
  -6 -17  -1   -4.31    4.41
  -7 -17  -1    2.60    4.86
  -5 -18   1    7.10    4.78
  -4 -18   1   -9.02    4.10
  -3 -18   1   15.97    4.86
  -2 -18   1   -3.21    4.07
  -2 -18  -1    8.78    4.36
  -3 -18  -1    1.75    4.33
  -4 -18  -1    4.22    4.62
 -20   0   2   14.89    5.38
 -19   0   2    0.60    4.77
 -18   0   2   22.97    5.17
 -17   0   2    2.87    4.34
 -16   0   2   34.55    5.11
 -15   0   2   40.99    4.99
 -14   0   2    1.95    3.63
 -13   0   2  135.67    7.58
 -12   0   2   20.92    3.56
  12   0  -2   29.35    3.92
 -11   0   2  111.16    6.21
  11   0  -2  106.10    6.73
  10   0  -2   23.01    3.27
 -10   0   2   15.25    3.05
   9   0  -2    3.57    2.62
  -9   0   2    5.68    2.53
   8   0  -2  298.14   10.88
  -8   0   2  289.85   10.51
   7   0  -2   74.91    5.04
  -7   0   2   83.00    4.60
  -6   0   2    3.06    1.97
   6   0  -2    3.59    2.10
   5   0  -2    0.88    2.08
  -5   0   2    2.87    1.88
  -4   0   2  487.22   15.62
  -3   0   2   11.89    1.73
  -3   0   2    8.20    1.74
   3   0  -2   13.79    1.81
   3   0  -2   12.86    1.44
   2   0  -2  347.73    9.64
  -2   0   2  365.02    9.70
   1   0  -2   -0.04    0.15
   0   0   2  460.31   14.64
   0   0   2  475.87   12.61
   0   0  -2  472.72   12.60
  -1   0  -2   10.57    1.64
   1   0   2    9.70    1.66
   2   0   2  189.05    7.19
  -2   0  -2  187.21    7.30
   3   0   2    1.83    2.08
  -3   0  -2   -2.35    2.18
  -4   0  -2   47.79    4.28
   4   0   2   47.83    3.98
  -5   0  -2    2.34    2.21
   5   0   2    2.26    2.07
   6   0   2   13.93    2.55
  -6   0  -2   14.23    2.64
  -7   0  -2  170.99    7.45
   7   0   2  160.02    7.32
  -8   0  -2   27.69    3.41
   8   0   2   27.05    3.24
  -9   0  -2   15.12    3.26
   9   0   2    9.87    2.88
  10   0   2    7.78    3.16
 -10   0  -2    9.32    3.35
 -11   0  -2   -1.54    3.33
 -12   0  -2   -0.54    3.83
 -13   0  -2    2.23    4.23
 -14   0  -2    0.05    4.26
 -15   0  -2   11.66    4.80
 -16   0  -2    1.24    4.61
 -17   0  -2   14.36    5.42
 -18   0  -2    7.28    5.45
 -20  -1   2    0.16    5.06
 -20   1   2    2.51    4.87
 -19  -1   2    2.19    5.00
 -19   1   2   -3.29    4.45
 -18  -1   2   -3.27    4.62
 -18   1   2   -5.58    4.09
 -17  -1   2   -3.29    4.22
 -17   1   2    3.48    4.19
 -16  -1   2    0.19    4.27
 -16   1   2    0.04    3.92
 -15  -1   2    1.89    4.00
 -15   1   2    3.09    3.89
 -14  -1   2    0.85    3.89
 -14   1   2    4.47    3.59
 -13  -1   2    1.09    3.47
  13  -1  -2    1.54    3.34
 -13   1   2    1.99    3.19
  12  -1  -2    2.38    3.11
 -12  -1   2    5.09    3.24
 -12   1   2    3.45    2.98
  12   1  -2    1.37    3.23
 -11  -1   2    7.53    3.08
  11  -1  -2   10.38    3.00
 -11   1   2    1.25    2.74
  11   1  -2    8.39    3.12
  10  -1  -2    1.35    2.61
 -10  -1   2    1.77    2.75
  10   1  -2   -1.37    2.65
 -10   1   2    2.89    2.49
  -9  -1   2   21.73    3.05
   9  -1  -2   23.57    3.04
  -9   1   2   24.10    2.82
   9   1  -2   20.41    3.18
   8  -1  -2   32.18    3.06
  -8  -1   2   30.85    3.20
   8   1  -2   33.67    3.36
  -8   1   2   33.77    2.92
  -7  -1   2    1.42    2.09
   7  -1  -2    0.03    2.04
   7   1  -2    2.52    2.33
  -7   1   2   -0.47    1.78
   6  -1  -2   28.27    2.51
  -6  -1   2   27.24    2.73
  -6   1   2   28.56    2.35
   6   1  -2   26.47    2.79
   5  -1  -2   11.56    2.14
  -5  -1   2   14.31    2.24
  -5   1   2   13.42    1.89
   5   1  -2   12.47    2.36
  -4  -1   2   98.57    5.14
  -4   1   2  100.65    4.62
   4   1  -2  106.20    5.37
   4   1  -2  109.51    5.23
   3  -1  -2    4.19    1.52
  -3  -1   2    3.70    1.81
  -3  -1   2    2.42    1.23
  -3  -1   2    2.87    1.83
   3   1  -2    4.52    1.30
   3   1  -2    0.93    1.87
  -2  -1   2   -0.05    0.99
   2  -1  -2    1.70    1.15
  -2  -1   2    1.21    1.57
  -2   1   2    0.30    1.01
   2   1  -2    0.58    1.69
   2   1  -2    1.35    1.09
  -2   1   2    0.11    1.12
   1  -1  -2   95.55    3.30
  -1  -1   2   99.77    3.25
  -1   1   2   93.78    3.18
   1   1  -2  102.42    3.39
  -1   1   2   93.54    3.75
   0  -1  -2   66.17    3.11
   0  -1  -2   64.55    2.74
   0   1   2   66.28    2.61
   0   1   2   64.25    3.10
   1  -1   2  262.84    8.73
  -1  -1  -2  260.97    8.94
  -2  -1  -2  147.92    6.34
   2  -1   2  135.96    5.76
   2   1   2  147.09    6.08
  -2   1  -2  140.93    6.04
  -3  -1  -2    1.69    2.22
   3  -1   2    1.82    1.91
  -3   1  -2   -1.59    2.02
   3   1   2    2.83    2.10
  -4  -1  -2    0.93    2.07
   4  -1   2    0.78    1.83
   4   1   2   -1.99    1.94
  -4   1  -2    1.57    2.01
  -5  -1  -2    5.70    2.34
   5  -1   2    3.03    1.97
  -5   1  -2    0.96    2.11
   5   1   2    0.86    2.08
  -6  -1  -2    2.64    2.54
   6  -1   2    4.53    2.24
   6   1   2    4.12    2.42
  -6   1  -2    3.34    2.50
  -7  -1  -2    9.15    2.96
   7  -1   2   11.66    2.62
   7   1   2    8.70    2.75
  -7   1  -2    7.91    2.86
   8  -1   2    9.77    2.68
  -8  -1  -2   11.45    3.08
   8   1   2    5.18    2.68
  -8   1  -2    8.15    2.97
  -9  -1  -2    3.81    3.06
   9  -1   2    3.51    2.60
   9   1   2    6.16    2.81
  -9   1  -2    5.37    3.02
 -10  -1  -2   -2.52    3.08
  10  -1   2   -2.69    2.67
 -10   1  -2   -0.60    3.15
  10   1   2   -0.93    2.93
 -11  -1  -2    2.05    3.53
  11  -1   2   -1.70    3.00
 -11   1  -2    0.61    3.52
 -12  -1  -2    6.54    3.96
 -12   1  -2    1.67    3.75
 -13  -1  -2   -3.74    4.04
 -13   1  -2    0.86    4.04
 -14  -1  -2    5.25    4.41
 -14   1  -2    1.85    4.29
 -15  -1  -2    2.84    4.72
 -15   1  -2    4.69    4.51
 -16  -1  -2    4.55    5.05
 -16   1  -2    5.35    4.70
 -17  -1  -2    1.71    5.04
 -17   1  -2    7.62    4.90
 -18  -1  -2    6.62    5.49
 -18   1  -2    2.94    5.02
 -20  -2   2   17.93    5.85
 -19  -2   2   -2.09    5.07
 -19   2   2    1.57    4.34
 -18  -2   2   32.99    5.76
 -18   2   2   31.64    5.00
 -17  -2   2   -2.69    4.43
 -17   2   2    0.25    4.05
 -16  -2   2   -1.61    4.31
 -16   2   2    5.33    3.83
 -15  -2   2   22.22    4.73
 -15   2   2   20.44    4.12
 -14  -2   2    2.89    3.93
  14  -2  -2   -1.99    3.50
 -14   2   2    2.36    3.39
  13  -2  -2   49.61    4.53
 -13  -2   2   41.97    4.78
 -13   2   2   42.17    4.20
 -12  -2   2    1.56    3.30
  12  -2  -2   -0.02    2.97
 -12   2   2    2.07    2.93
  11  -2  -2    9.32    2.87
 -11  -2   2    3.76    3.07
 -11   2   2    6.91    2.67
  11   2  -2    2.72    3.09
  10  -2  -2    0.43    2.41
 -10  -2   2    1.31    2.79
  10   2  -2    2.61    2.91
 -10   2   2    1.24    2.37
  -9  -2   2    4.13    2.66
   9  -2  -2    1.52    2.33
   9   2  -2   -0.04    2.69
  -9   2   2    1.34    2.18
   8  -2  -2   50.16    4.04
  -8  -2   2   50.54    4.69
   8   2  -2   50.68    4.01
  -8   2   2   56.86    3.99
   7  -2  -2  117.43    5.27
  -7  -2   2  124.37    5.81
   7   2  -2  110.33    5.91
  -7   2   2  114.29    4.98
  -6  -2   2   13.15    2.46
   6  -2  -2   10.15    1.94
  -6   2   2   14.29    1.72
   6   2  -2   12.84    2.48
  -5  -2   2  392.89   12.57
   5   2  -2  348.19   12.47
  -5   2   2  363.55   11.68
   5   2  -2  357.62   12.27
  -4  -2   2    1.35    2.16
   4   2  -2   -0.77    1.41
   4   2  -2    0.30    1.89
   4   2  -2    1.99    2.31
  -4   2   2   -0.58    1.38
  -3  -2   2  408.29   11.26
  -3  -2   2  430.44   13.74
  -3  -2   2  407.32   13.17
   3   2  -2  413.24   11.30
  -2  -2   2   -0.44    1.81
  -2  -2   2   -1.06    1.97
   2  -2  -2    1.06    1.29
  -2  -2   2   -0.50    1.08
  -2   2   2   -2.02    1.24
   2   2  -2   -0.58    1.53
   2   2  -2    0.36    1.20
   1  -2  -2  233.54    6.68
  -1  -2   2  220.22    6.59
   1  -2  -2  235.03    7.64
  -1   2   2  241.76    7.71
  -1   2   2  222.01    6.53
   0  -2  -2  157.89    5.91
   0  -2  -2  153.90    4.78
   0   2   2  161.45    5.87
   0   2   2  154.15    4.76
  -1  -2  -2   28.04    2.47
   1   2   2   33.56    2.65
   1   2   2   32.95    2.47
   2  -2   2    5.80    1.93
  -2  -2  -2    6.59    2.27
  -3  -2  -2    2.56    2.24
   3  -2   2    2.95    1.73
  -3   2  -2    2.32    2.09
   3   2   2    3.75    2.13
  -4  -2  -2  111.69    5.52
   4  -2   2  110.57    5.01
   4   2   2  112.41    5.51
  -4   2  -2  126.52    5.42
   5  -2   2   53.71    3.81
  -5  -2  -2   60.73    4.67
  -5   2  -2   59.05    4.28
   5   2   2   62.39    4.76
  -6  -2  -2    1.70    2.63
   6  -2   2    2.02    2.13
   6   2   2    1.95    2.43
  -6   2  -2    0.62    2.45
   7  -2   2   53.53    4.55
  -7  -2  -2   51.92    4.81
   7   2   2   42.33    3.71
  -7   2  -2   42.58    3.64
  -8  -2  -2   32.93    3.86
   8  -2   2   39.31    3.35
   8   2   2   32.43    3.58
  -8   2  -2   37.32    3.54
   9  -2   2   -2.81    2.38
  -9  -2  -2    1.56    3.07
  -9   2  -2    3.28    2.90
   9   2   2    1.84    2.91
 -10  -2  -2   24.44    4.04
  10  -2   2   26.77    3.37
 -10   2  -2   24.16    3.80
 -11  -2  -2    2.12    3.62
  11  -2   2    1.61    3.08
 -11   2  -2   -3.85    3.20
 -12  -2  -2    6.88    4.25
  12  -2   2    8.04    3.51
 -12   2  -2   11.83    3.88
 -13  -2  -2    2.63    4.24
 -13   2  -2   -1.13    3.79
 -14  -2  -2    5.79    4.46
 -14   2  -2    0.17    4.05
 -15  -2  -2    4.01    4.76
 -15   2  -2   -0.47    4.31
 -16  -2  -2    9.70    5.23
 -16   2  -2    4.70    4.62
 -17  -2  -2    8.83    5.44
 -17   2  -2    1.05    4.68
 -18  -2  -2   10.49    5.83
 -18   2  -2   12.93    5.20
 -19  -3   2    0.31    5.28
 -18  -3   2    0.88    4.92
 -18   3   2    5.44    4.17
 -17  -3   2   -8.51    4.50
 -17   3   2    2.89    3.92
 -16  -3   2   14.22    4.92
 -16   3   2   14.15    3.91
 -15  -3   2   -1.37    4.25
  15  -3  -2   -1.14    3.63
 -15   3   2    1.43    3.44
 -14  -3   2   -1.05    3.95
  14  -3  -2   -3.30    3.38
 -14   3   2    5.17    3.37
 -13  -3   2    0.16    3.74
  13  -3  -2    1.36    3.12
 -13   3   2    2.06    3.02
  12  -3  -2   -1.23    2.78
 -12  -3   2   -0.35    3.34
 -12   3   2   -1.49    2.67
  11  -3  -2   -2.07    2.50
 -11  -3   2    1.31    3.14
 -11   3   2    2.83    2.47
  10  -3  -2   16.73    2.70
 -10  -3   2   10.56    3.20
 -10   3   2   14.27    2.50
  10   3  -2   14.18    3.30
   9  -3  -2    5.42    2.23
  -9  -3   2    4.25    2.81
  -9   3   2   -1.78    1.99
   9   3  -2    4.34    2.85
  -8  -3   2   21.76    3.09
   8  -3  -2   14.23    2.28
  -8   3   2   13.43    2.04
   8   3  -2   16.99    3.11
  -7  -3   2  104.75    5.78
   7  -3  -2  105.31    4.80
  -7   3   2  109.55    4.53
   7   3  -2   96.67    6.18
  -6  -3   2   43.39    3.41
   6   3  -2   40.06    3.42
  -6   3   2   43.08    2.62
  -5  -3   2   30.04    2.85
   5   3  -2   34.45    2.40
   5   3  -2   29.49    2.97
  -5   3   2   25.56    2.13
  -4  -3   2   24.59    2.79
  -3  -3   2  140.96    6.10
  -3  -3   2  135.84    6.21
  -3  -3   2  150.68    4.39
  -3   3   2  127.58    4.87
   3   3  -2  144.71    4.57
   3   3  -2  140.67    5.91
   3   3  -2  137.01    6.36
  -2  -3   2   64.00    4.13
  -2  -3   2   58.96    2.72
   2  -3  -2   45.39    3.12
  -2  -3   2   61.27    4.28
   2   3  -2   63.06    2.89
   2   3  -2   55.53    3.87
  -2   3   2   47.43    3.22
   1  -3  -2   21.00    1.75
   1  -3  -2   23.83    2.14
  -1   3   2   26.77    2.07
   0  -3  -2  946.09   29.85
   0  -3  -2  965.42   25.35
   0   3   2 1000.00   29.86
   0   3   2  955.71   25.31
  -1  -3  -2  194.41    7.60
  -1  -3  -2  195.29    5.91
   1   3   2  202.60    7.53
   1   3   2  200.03    5.93
  -2  -3  -2  145.19    6.23
   2   3   2  140.10    4.70
   2   3   2  134.84    6.04
  -3  -3  -2    1.40    2.09
   3  -3   2   -1.79    1.51
   4  -3   2    2.28    1.66
  -4  -3  -2    3.66    2.27
   4   3   2    1.20    1.59
  -5  -3  -2    4.51    2.55
   5  -3   2    3.10    1.79
  -5   3  -2   -0.37    2.16
   5   3   2    0.89    2.30
  -6  -3  -2    6.70    2.93
   6  -3   2    9.70    2.19
  -6   3  -2   10.28    2.56
   6   3   2    8.88    2.71
  -7  -3  -2   14.21    3.21
   7  -3   2   11.83    2.43
  -7   3  -2   13.66    2.81
   7   3   2   11.36    2.89
  -8  -3  -2    6.57    3.16
   8  -3   2    5.89    2.34
   8   3   2    0.81    2.77
  -8   3  -2    5.45    2.80
  -9  -3  -2    4.98    3.32
   9  -3   2   -1.29    2.35
  -9   3  -2    6.26    2.87
  10  -3   2   -5.33    2.52
 -10  -3  -2    0.16    3.40
 -10   3  -2    0.97    3.10
 -11  -3  -2   -1.09    3.72
  11  -3   2   -8.44    2.78
 -11   3  -2    4.63    3.40
 -12  -3  -2    9.01    4.25
  12  -3   2    8.02    3.37
 -12   3  -2    2.51    3.67
 -13  -3  -2    6.87    4.44
 -13   3  -2   12.63    4.20
 -14  -3  -2    5.46    4.60
 -14   3  -2   -1.23    3.85
 -15  -3  -2    1.83    4.69
 -15   3  -2    7.77    4.32
 -16  -3  -2    1.89    5.01
 -16   3  -2    4.33    4.42
 -17  -3  -2   -0.19    5.27
 -17   3  -2    7.72    4.69
 -18  -3  -2    3.50    5.78
 -19  -4   2   -1.11    5.34
 -18  -4   2    9.20    5.31
 -17  -4   2   16.34    5.37
 -17   4   2   26.96    4.36
 -16  -4   2    0.17    4.56
 -16   4   2    1.46    3.58
  15  -4  -2    4.06    3.40
 -15  -4   2   -3.06    4.33
 -15   4   2    4.74    3.40
  14  -4  -2    4.81    3.25
 -14  -4   2    2.11    4.13
 -14   4   2    3.20    3.11
  13  -4  -2    4.38    3.09
 -13  -4   2   -1.61    3.71
 -13   4   2    3.40    2.88
  12  -4  -2    7.90    2.87
 -12  -4   2    9.97    3.90
 -12   4   2    9.51    2.76
 -11  -4   2   16.91    3.76
  11  -4  -2   20.38    2.86
 -11   4   2   21.55    2.74
 -10  -4   2  143.42    7.50
  10  -4  -2  135.86    6.11
 -10   4   2  140.56    5.91
   9  -4  -2   25.84    2.54
  -9  -4   2   30.99    3.80
  -9   4   2   27.06    2.41
   9   4  -2   31.18    3.78
  -8  -4   2  120.51    6.47
  -8   4   2  118.05    4.92
   8   4  -2  130.81    7.19
  -7  -4   2   21.17    3.16
   7   4  -2   21.17    3.19
  -7   4   2   22.67    1.77
  -6  -4   2   32.68    3.27
   6   4  -2   43.53    2.68
   6   4  -2   34.88    3.21
   6   4  -2   29.31    3.14
  -5  -4   2   13.69    2.51
   5   4  -2   15.23    1.43
   5   4  -2   -0.13    1.64
  -4  -4   2   44.06    3.34
   4   4  -2   45.20    3.50
   4   4  -2   41.83    2.42
  -3  -4   2   80.15    4.94
  -3  -4   2   75.92    2.82
  -3  -4   2   71.43    4.77
   3   4  -2   75.68    4.95
   3   4  -2   75.79    3.07
  -3   4   2   77.74    2.99
   3   4  -2   73.38    4.95
  -2  -4   2  141.23    4.58
  -2  -4   2  142.80    6.18
   2  -4  -2  142.86    5.23
  -2  -4   2  145.95    6.23
  -2   4   2  140.91    5.16
  -1  -4   2   17.05    2.48
   1  -4  -2   19.44    2.04
   1  -4  -2   18.20    1.70
  -1   4   2   19.16    1.93
   0  -4  -2  168.18    5.34
   0  -4  -2  183.17    6.76
   0   4   2  168.25    5.20
   0   4   2  176.15    6.67
  -1  -4  -2   49.70    3.86
  -1  -4  -2   45.82    2.49
   1   4   2   49.28    2.35
   1   4   2   53.28    3.81
  -2  -4  -2    2.27    2.06
   2   4   2    0.10    1.88
   2   4   2   -0.14    1.20
   3  -4   2   30.69    2.62
  -3  -4  -2   32.28    3.01
   3   4   2   33.79    2.56
  -4  -4  -2    3.38    2.42
   4  -4   2   -2.06    1.53
   4   4   2   -0.42    0.87
  -5  -4  -2   35.72    3.55
   5  -4   2   45.15    3.46
  -6  -4  -2   -2.41    2.73
   6  -4   2    1.12    1.86
  -6   4  -2   -0.41    2.25
   6   4   2   -0.40    2.51
  -7  -4  -2   12.04    3.29
   7  -4   2   17.53    2.39
   7   4   2   17.70    3.17
  -7   4  -2   14.39    2.72
   8  -4   2    5.56    2.25
  -8  -4  -2    2.11    3.26
  -8   4  -2    4.56    2.67
  -9  -4  -2    1.20    3.30
   9  -4   2    3.41    2.42
  -9   4  -2    3.96    2.88
  10  -4   2   22.43    3.01
 -10  -4  -2   20.91    4.17
 -10   4  -2   21.18    3.50
 -11  -4  -2   -1.10    3.87
  11  -4   2   -2.75    2.80
 -11   4  -2    4.20    3.37
 -12  -4  -2    2.16    4.29
  12  -4   2   -1.16    3.11
 -12   4  -2    3.09    3.57
  13  -4   2    1.53    3.32
 -13  -4  -2    7.49    4.61
 -13   4  -2   10.74    3.92
 -14  -4  -2    6.51    4.63
 -14   4  -2    7.79    3.99
 -15  -4  -2   11.46    5.16
 -15   4  -2   19.64    4.40
 -16  -4  -2    2.96    5.10
 -16   4  -2    6.57    4.18
 -17  -4  -2    7.75    5.49
 -18  -4  -2    4.22    5.86
 -19  -5   2    0.55    5.57
 -18  -5   2   -5.98    5.19
 -17  -5   2   -1.22    4.94
 -16  -5   2   -0.08    4.65
 -16   5   2    0.26    3.23
 -15  -5   2    0.20    4.55
 -15   5   2    0.06    3.17
 -14  -5   2    6.76    4.37
  14  -5  -2    7.48    3.09
 -14   5   2    3.92    3.00
  13  -5  -2    8.64    2.94
 -13  -5   2    1.07    4.00
 -13   5   2    4.15    2.83
 -12  -5   2   22.42    4.41
  12  -5  -2   26.42    3.11
 -12   5   2   29.17    3.08
  11  -5  -2   22.22    2.67
 -11  -5   2   17.30    3.94
 -11   5   2   14.64    2.50
 -10  -5   2    3.19    3.10
 -10   5   2    0.28    1.91
  -9  -5   2   26.03    3.70
  -9   5   2   26.77    2.18
  -8  -5   2   -1.28    2.72
   8   5  -2    0.38    1.44
   8   5  -2    1.49    2.70
  -7  -5   2  134.66    7.16
   7   5  -2  138.99    4.77
  -6  -5   2   16.54    2.91
   6   5  -2   12.58    3.15
   6   5  -2   14.57    1.57
  -5  -5   2    3.44    2.42
   5   5  -2   -1.41    2.46
   5   5  -2   -0.15    2.24
   5   5  -2    0.98    1.18
  -4  -5   2   43.09    3.37
   4   5  -2   39.42    2.27
   4   5  -2   38.72    3.27
  -3  -5   2    2.12    2.13
   3  -5  -2    2.41    1.16
  -3  -5   2    5.43    2.48
  -3  -5   2   -3.69    0.99
  -3   5   2    3.47    1.06
   3   5  -2    1.03    1.91
   3   5  -2    0.64    2.37
  -2  -5   2   12.64    2.49
  -2  -5   2   10.08    1.42
  -2  -5   2   13.49    2.42
   2  -5  -2   11.00    1.60
  -2   5   2   11.03    1.48
  -1  -5   2   21.57    2.35
  -1  -5   2   19.91    2.84
   1  -5  -2   22.76    1.78
   1  -5  -2   21.42    2.03
  -1   5   2   20.80    1.88
  -1   5   2   23.88    2.05
   0  -5  -2   97.80    3.60
   0  -5   2   93.06    4.79
   0  -5  -2   99.51    4.80
   0   5   2  103.51    4.76
  -1  -5  -2    1.02    1.12
  -1  -5  -2    0.72    1.98
   1   5   2    1.09    0.98
   1   5   2    0.78    1.80
  -2  -5  -2   44.61    3.98
   2   5   2   39.76    2.17
  -3  -5  -2   35.46    3.32
   3   5   2   39.39    3.16
   3   5   2   36.77    2.30
  -4  -5  -2   10.62    2.81
   4  -5   2    5.05    1.60
   4   5   2    7.49    2.41
   4   5   2   10.28    1.66
   5  -5   2   54.73    3.58
  -5  -5  -2   52.34    4.20
   5   5   2   55.70    4.03
  -6  -5  -2   -0.85    2.77
   6  -5   2    0.85    1.75
  -7  -5  -2    6.31    3.16
   7  -5   2    4.04    1.93
   7   5   2    6.18    2.65
  -8  -5  -2   12.36    3.53
   8  -5   2   10.66    2.26
  -9  -5  -2   -0.35    3.42
   9  -5   2   -0.18    2.27
  -9   5  -2    1.80    2.71
 -10  -5  -2    2.39    3.68
  10  -5   2    0.29    2.42
 -10   5  -2   -1.52    2.86
 -11  -5  -2    7.95    4.26
  11  -5   2    8.87    2.96
 -11   5  -2    8.64    3.40
  12  -5   2   -3.27    2.89
 -12  -5  -2    0.15    4.29
 -12   5  -2    4.61    3.46
 -13  -5  -2    5.00    4.71
  13  -5   2   -5.65    3.10
 -13   5  -2    2.42    3.57
 -14  -5  -2   -1.82    4.57
 -14   5  -2    3.36    3.70
 -15  -5  -2   -2.36    4.86
 -15   5  -2    7.97    3.94
 -16  -5  -2    5.52    5.35
 -17  -5  -2    8.65    5.66
 -19  -6   2   -9.96    5.50
 -18  -6   2    7.30    5.67
 -17  -6   2    8.85    5.51
 -16  -6   2   -7.87    4.78
 -15  -6   2    1.69    4.62
 -15   6   2    9.47    2.97
 -14  -6   2   -1.63    4.27
 -14   6   2    5.09    2.67
 -13  -6   2    3.56    4.09
 -13   6   2    0.80    2.48
 -12  -6   2    4.16    4.05
 -12   6   2    8.00    2.34
 -11  -6   2   17.03    4.11
 -11   6   2   11.48    2.12
  -9  -6   2    7.27    3.21
   9   6  -2   11.65    1.75
  -8  -6   2   17.72    3.46
   8   6  -2   22.96    1.93
  -7  -6   2   61.74    5.25
   7   6  -2   63.95    5.46
   7   6  -2   60.99    2.96
  -6  -6   2  121.74    6.61
   6   6  -2  112.47    6.87
   6   6  -2  118.47    6.53
   6   6  -2  110.57    3.89
  -5  -6   2   -0.07    2.57
   5   6  -2   -0.17    2.54
   5   6  -2    0.97    2.81
  -4  -6   2   46.87    3.73
   4   6  -2   49.32    3.95
   4   6  -2   48.76    4.20
  -3  -6   2   17.81    2.91
   3  -6  -2   15.26    1.54
  -3  -6   2   13.10    2.54
  -3  -6   2   11.29    1.28
  -3   6   2   13.16    1.49
   3   6  -2   13.22    2.51
  -2  -6   2    2.43    1.39
  -2  -6   2    4.20    2.19
  -2  -6   2    3.62    2.33
   2  -6  -2    6.04    1.59
  -2   6   2    4.29    1.48
   1  -6  -2   79.14    4.08
  -1  -6   2   77.32    4.55
   1  -6  -2   81.99    3.57
  -1  -6   2   78.64    4.79
  -1   6   2   79.26    4.12
  -1   6   2   72.96    3.84
   0  -6  -2   63.34    3.04
   0  -6   2   66.76    4.12
   0  -6  -2   63.95    4.22
   0   6   2   66.86    4.16
   0   6   2   68.21    3.91
  -1  -6  -2   51.47    4.36
  -1  -6  -2   52.86    2.61
   1  -6   2   53.14    3.81
  -2  -6  -2   24.80    3.01
   2   6   2   23.35    2.71
  -3  -6  -2    2.43    2.59
   3   6   2    2.50    2.31
  -4  -6  -2    2.86    2.87
   4  -6   2   -1.15    1.40
   4   6   2    1.01    1.23
   4   6   2    0.41    2.41
  -5  -6  -2    0.26    2.80
   5  -6   2   -4.27    1.43
   5   6   2    1.19    2.51
   5   6   2    1.00    1.50
  -6  -6  -2    4.53    3.05
   6  -6   2    4.28    1.68
   6   6   2    8.32    2.73
  -7  -6  -2    6.59    3.35
   7  -6   2   10.25    1.93
   8  -6   2   58.49    4.00
  -8  -6  -2   55.44    4.95
  -9  -6  -2    5.81    3.82
   9  -6   2    3.98    2.27
  10  -6   2   13.97    2.67
 -10  -6  -2   15.94    4.36
 -11  -6  -2    8.83    4.48
  11  -6   2    1.06    2.69
  12  -6   2   -1.51    2.76
 -12  -6  -2    6.17    4.57
 -13  -6  -2    7.25    4.73
 -14  -6  -2   -0.61    4.79
 -14   6  -2    6.80    3.47
 -15  -6  -2    7.76    5.18
 -16  -6  -2    2.26    5.43
 -17  -6  -2    4.48    5.68
 -18  -7   2   -9.81    5.39
 -17  -7   2   -3.69    5.26
 -16  -7   2   -4.34    4.91
 -15  -7   2   -8.03    4.45
 -14  -7   2    7.65    4.72
 -14   7   2   10.93    2.35
 -13  -7   2   -0.27    4.25
  13   7  -2   -3.43    2.09
 -12  -7   2    7.15    4.24
  12   7  -2    5.84    2.18
 -11  -7   2   11.80    4.11
  11   7  -2   -1.11    1.21
 -10  -7   2   13.02    3.87
  10   7  -2   13.75    1.95
  -9  -7   2   40.48    4.49
   9   7  -2   44.94    3.07
  -8  -7   2    2.27    3.09
   8   7  -2    0.68    1.34
  -7  -7   2   11.56    3.12
   7   7  -2   12.42    3.27
  -6  -7   2   12.33    3.17
   6   7  -2   16.52    3.24
  -5  -7   2    2.12    2.65
   5   7  -2    3.24    2.81
   5   7  -2    6.60    3.07
  -4  -7   2   -0.41    2.43
   4   7  -2   -5.77    2.78
   4   7  -2   -1.08    2.58
  -3  -7   2    9.07    2.73
   3  -7  -2   15.13    1.74
  -3  -7   2   10.66    2.83
  -3  -7   2    9.78    1.26
   3   7  -2    8.70    3.11
  -3   7   2   11.99    1.68
   3   7  -2   12.42    2.93
  -2  -7   2    2.75    2.50
  -2  -7   2    8.19    2.39
   2  -7  -2    9.17    1.87
  -2   7   2    4.89    1.78
   1  -7  -2   26.99    2.07
  -1  -7   2   25.03    3.20
   1  -7  -2   26.47    2.59
  -1  -7   2   26.82    2.73
  -1   7   2   28.95    2.49
   0  -7  -2    5.60    1.43
   0  -7   2    5.12    2.13
   0  -7   2   10.36    2.81
   0  -7  -2    6.07    2.25
   0   7   2    6.09    2.00
   0   7   2    6.91    2.20
  -1  -7  -2   24.46    2.92
  -1  -7  -2   14.96    1.53
   1  -7   2   20.86    2.42
   1   7   2   14.34    2.26
   1   7   2   23.15    2.69
  -2  -7  -2   65.85    5.07
   2  -7   2   60.14    4.04
   2   7   2   63.34    4.77
  -3  -7  -2   14.97    3.08
   3   7   2   14.08    2.75
  -4  -7  -2    3.95    2.82
   4   7   2   -1.10    2.42
  -5  -7  -2    4.84    3.07
   5  -7   2    1.08    1.48
   5   7   2    5.78    2.69
   6  -7   2   18.71    1.94
  -6  -7  -2   17.74    3.66
   6   7   2   15.26    1.79
   7  -7   2   19.31    2.01
  -7  -7  -2   21.27    3.87
  -8  -7  -2    7.93    3.74
   8  -7   2    5.15    1.91
  -9  -7  -2   15.44    4.20
   9  -7   2   14.61    2.36
  10  -7   2    1.18    2.31
 -10  -7  -2   -0.88    4.11
 -11  -7  -2   12.66    4.57
  11  -7   2   11.03    2.73
 -12  -7  -2    3.45    4.54
 -13  -7  -2   12.97    5.09
 -14  -7  -2   13.60    5.38
 -15  -7  -2   -0.56    5.14
 -16  -7  -2    8.76    5.90
 -17  -7  -2    5.13    5.93
 -18  -8   2   -5.54    5.78
 -17  -8   2   -3.78    5.46
 -16  -8   2   -0.42    5.16
 -15  -8   2   -1.92    4.93
 -14  -8   2   -3.03    4.43
 -13  -8   2   -1.43    4.29
 -12  -8   2    2.20    4.28
  12   8  -2    2.09    1.63
 -11  -8   2    7.78    4.18
  11   8  -2    0.50    1.69
 -10  -8   2   25.28    4.50
  10   8  -2   21.67    2.08
  -9  -8   2   16.00    3.93
   9   8  -2   14.24    1.66
  -8  -8   2   10.06    3.54
  -7  -8   2   -1.21    3.00
  -6  -8   2    0.86    2.74
   6   8  -2   -3.30    2.73
  -5  -8   2    4.06    2.80
   5   8  -2    0.51    2.82
  -4  -8   2   -0.19    2.63
   4   8  -2    0.40    2.73
   4   8  -2    1.91    3.06
   3  -8  -2    8.38    1.70
  -3  -8   2    5.00    1.23
  -3  -8   2    9.24    2.82
  -3  -8   2   12.65    2.91
   3   8  -2    5.19    2.88
  -3   8   2    7.05    1.81
  -2  -8   2   12.89    2.91
  -2  -8   2   10.88    2.64
   2  -8  -2   14.54    2.13
  -2   8   2   11.20    2.04
  -1  -8   2   26.62    3.43
  -1  -8   2   26.63    2.86
   1  -8  -2   25.15    2.15
   1  -8  -2   26.93    2.74
  -1   8   2   31.41    2.67
   0  -8  -2  105.46    4.00
   0  -8  -2  101.19    5.48
   0  -8   2  104.04    5.28
   0  -8   2  104.40    5.81
   0   8   2   94.13    5.23
   1  -8   2   12.81    2.35
  -1  -8  -2   11.93    1.44
  -1  -8  -2   12.60    2.74
   1   8   2   16.77    2.65
   1   8   2   12.53    2.54
   2  -8   2   35.56    2.73
  -2  -8  -2   35.08    3.52
   2   8   2   35.46    3.35
   2   8   2   30.24    3.27
  -3  -8  -2    1.61    2.74
   3  -8   2    1.55    1.84
   3   8   2    3.02    2.65
   3   8   2   -1.04    2.39
  -4  -8  -2   -0.26    2.79
   4  -8   2    1.27    1.77
   4   8   2   -2.77    2.42
   5  -8   2   26.36    2.01
  -5  -8  -2   28.97    3.92
   6  -8   2    0.53    1.47
  -6  -8  -2    2.03    3.25
  -7  -8  -2   88.10    7.33
   7  -8   2   90.81    4.04
   7   8   2   88.81    3.62
  -8  -8  -2   24.64    4.46
   8   8   2   24.37    2.29
  -9  -8  -2    9.83    4.25
 -10  -8  -2   -1.52    4.09
  10  -8   2   -6.20    2.00
 -11  -8  -2    2.38    4.28
 -12  -8  -2    0.81    4.58
 -13  -8  -2   16.19    5.34
 -14  -8  -2    2.26    5.05
 -15  -8  -2    9.07    5.55
 -16  -8  -2   -7.93    5.48
 -17  -9   2   -2.52    5.55
 -16  -9   2   -7.36    5.20
 -15  -9   2    2.05    5.03
 -14  -9   2   -2.74    4.69
 -13  -9   2   -1.05    4.38
 -12  -9   2    4.19    4.46
 -11  -9   2   16.59    4.78
  11   9  -2   16.55    1.91
 -10  -9   2    4.99    4.04
  -9  -9   2    0.41    3.73
  -8  -9   2    6.14    3.51
  -7  -9   2   12.24    3.66
  -6  -9   2    1.37    2.89
  -5  -9   2   13.23    3.28
   5  -9  -2   12.73    1.87
   5   9  -2   17.12    3.41
  -4  -9   2   27.39    3.47
   4  -9  -2   31.68    2.63
   4   9  -2   23.24    3.69
  -3  -9   2    3.72    1.20
   3  -9  -2    8.24    1.80
  -3  -9   2    3.74    2.67
  -3  -9   2    0.79    2.72
  -3   9   2    0.96    1.85
   3   9  -2    3.16    2.85
  -2  -9   2   35.22    3.73
   2  -9  -2   40.49    3.63
  -2  -9   2   38.69    3.56
  -2   9   2   38.36    2.93
   1  -9  -2   24.59    2.78
  -1  -9   2   20.74    2.77
  -1  -9   2   22.83    3.48
   1  -9  -2   24.03    2.15
   0  -9  -2    1.54    2.33
   0  -9   2    0.56    2.06
   0  -9   2   -0.54    2.74
   0  -9  -2    1.05    1.50
   0   9   2   -1.31    2.12
   0   9   2    2.66    2.33
  -1  -9  -2   39.91    3.63
  -1  -9  -2   36.51    2.45
   1  -9   2   30.74    2.95
   1  -9   2   42.84    3.98
   1   9   2   31.61    3.31
   2  -9   2   -3.47    1.95
  -2  -9  -2    3.83    2.77
   2   9   2   -4.07    2.42
   2   9   2    1.46    2.42
   3  -9   2    7.25    2.07
  -3  -9  -2    8.01    3.06
   3   9   2    9.53    2.84
   3   9   2   10.41    3.06
   4  -9   2   17.85    2.13
  -4  -9  -2   20.18    3.60
   4   9   2   15.27    3.25
  -5  -9  -2    1.56    3.29
   5  -9   2   -1.10    1.69
  -6  -9  -2   19.75    4.03
  -7  -9  -2    6.91    3.91
  -8  -9  -2    0.71    3.89
  -9  -9  -2    4.64    4.37
   9   9   2    1.79    1.71
 -10  -9  -2   -0.59    4.23
  10   9   2   -0.92    1.97
 -11  -9  -2   13.14    4.89
 -12  -9  -2    4.53    4.87
 -13  -9  -2    7.79    5.30
 -14  -9  -2   11.25    5.60
 -15  -9  -2    6.66    5.83
 -16  -9  -2    5.80    5.93
 -17 -10   2   -3.26    5.77
 -16 -10   2  -11.42    5.17
 -15 -10   2    2.15    5.39
 -14 -10   2   -5.30    4.85
 -13 -10   2   -3.13    4.38
 -12 -10   2   -5.66    4.26
 -11 -10   2   13.26    4.72
 -10 -10   2    0.91    4.14
  -9 -10   2   25.97    4.65
  -8 -10   2    7.81    3.90
  -7 -10   2    6.59    3.58
  -6 -10   2    6.25    3.43
   6 -10  -2    4.23    1.86
  -5 -10   2    4.17    3.19
   4 -10  -2    4.37    1.61
  -4 -10   2    0.00    2.84
   4  10  -2    5.49    3.15
   3 -10  -2   10.22    2.03
  -3 -10   2    5.40    2.91
   3  10  -2   16.53    3.38
  -3  10   2    5.76    2.07
  -2 -10   2    7.28    2.70
   2 -10  -2    3.85    2.15
  -2 -10   2    5.91    2.91
  -2  10   2    0.59    1.56
   1 -10  -2    9.95    2.54
  -1 -10   2    5.71    2.95
   1 -10  -2    8.49    1.94
  -1 -10   2   10.65    2.64
  -1  10   2    7.84    2.41
   0 -10  -2   52.49    3.25
   0 -10   2   51.20    4.42
   0 -10  -2   53.34    3.94
   0 -10   2   50.00    4.36
   0  10   2   57.77    5.01
  -1 -10  -2    0.25    1.35
   1 -10   2    0.51    2.81
  -1 -10  -2    3.52    2.74
   1 -10   2   -1.45    2.13
   1  10   2    1.65    2.74
   1  10   2   -2.17    2.49
  -2 -10  -2    2.07    2.93
   2 -10   2    2.33    2.17
   2  10   2    3.34    2.92
   2  10   2    3.74    2.72
   3 -10   2    2.81    2.06
  -3 -10  -2    2.14    3.04
   3  10   2    4.36    2.84
   3  10   2   -0.83    2.93
  -4 -10  -2    2.48    3.31
   4 -10   2   -0.08    1.89
   5 -10   2    2.16    1.79
  -5 -10  -2    2.63    3.49
  -6 -10  -2    3.95    3.83
  -7 -10  -2    6.90    4.07
  -8 -10  -2    2.59    4.13
  -9 -10  -2    5.90    4.47
 -10 -10  -2    3.85    4.58
 -11 -10  -2    6.25    4.91
 -12 -10  -2    9.97    5.21
 -13 -10  -2    3.01    5.22
 -14 -10  -2    3.66    5.51
 -15 -10  -2    7.46    5.99
 -16 -11   2  -15.20    5.32
 -15 -11   2   -2.37    5.35
 -14 -11   2   -1.42    5.00
 -13 -11   2   -4.02    4.81
 -12 -11   2    4.00    4.79
 -11 -11   2    4.00    4.60
 -10 -11   2   -2.20    4.19
  -9 -11   2   -0.72    4.05
  -8 -11   2   -1.17    3.91
  -7 -11   2   14.16    4.03
  -6 -11   2   56.17    5.15
  -5 -11   2   27.51    4.11
   4 -11  -2   24.37    2.29
  -4 -11   2   25.10    3.82
  -3 -11   2   14.10    3.37
   3 -11  -2   12.66    2.27
  -3  11   2   15.99    2.49
  -2 -11   2   22.23    3.40
   2 -11  -2   20.67    2.70
  -2 -11   2   18.42    3.52
  -2  11   2   11.95    2.49
  -1 -11   2    6.86    3.22
  -1 -11   2   12.43    2.82
   1 -11  -2    9.58    2.71
   1 -11  -2   11.22    2.16
  -1  11   2    8.86    2.73
   0 -11   2   10.03    3.36
   0 -11  -2    9.35    2.91
   0 -11  -2   13.05    1.92
   0 -11   2   11.03    2.72
   0  11   2   11.58    2.94
   1 -11   2   44.18    3.60
   1 -11   2   42.94    4.38
  -1 -11  -2   40.97    2.77
  -1 -11  -2   48.64    4.24
   1  11   2   56.98    4.56
   1  11   2   46.02    4.11
   2 -11   2    3.32    2.39
   2 -11   2    6.24    3.18
  -2 -11  -2    9.04    3.21
   2  11   2    8.02    3.34
   2  11   2    4.63    3.02
   3 -11   2    0.05    2.14
  -3 -11  -2    0.05    3.31
  -4 -11  -2    3.31    3.55
   4 -11   2   -2.45    1.97
  -5 -11  -2    1.06    3.72
   5 -11   2   -3.88    1.76
  -6 -11  -2   20.63    4.55
  -7 -11  -2    4.07    4.20
  -8 -11  -2    6.97    4.46
  -9 -11  -2    8.93    4.79
 -10 -11  -2    8.07    4.88
 -11 -11  -2   10.86    5.13
 -12 -11  -2   -2.65    4.95
 -13 -11  -2   -3.23    5.17
 -14 -11  -2   -1.76    5.47
 -15 -12   2   -4.82    5.50
 -14 -12   2   -7.56    5.22
 -13 -12   2   -3.11    4.98
 -12 -12   2   -3.66    4.74
 -11 -12   2    1.27    4.58
 -10 -12   2   -3.64    4.29
  -9 -12   2    1.15    4.31
  -8 -12   2   33.53    5.14
  -7 -12   2   -0.25    3.82
  -6 -12   2   -1.69    3.60
  -5 -12   2    9.72    3.73
  -4 -12   2   -2.28    3.24
   4 -12  -2    3.18    1.96
  -3 -12   2    0.98    3.27
   3 -12  -2    3.58    2.21
  -2 -12   2   21.64    3.50
  -2 -12   2   10.77    3.59
  -2 -12   2   19.88    2.11
   2 -12  -2   19.66    2.70
   2 -12  -2   19.92    2.94
  -2  12   2   15.53    3.02
   1 -12  -2   40.88    2.96
   1 -12  -2   36.43    3.69
  -1 -12   2   32.03    4.25
  -1 -12   2   40.67    3.87
  -1  12   2   33.42    3.72
   0 -12   2   57.12    4.85
   0 -12   2   56.23    4.27
   0 -12  -2   55.50    3.73
   0 -12  -2   53.42    4.43
   0  12   2   60.65    4.70
   1 -12   2    3.26    2.65
   1 -12   2    7.51    3.42
  -1 -12  -2    8.46    3.34
   1  12   2    2.02    3.22
   2 -12   2   24.89    3.07
   2 -12   2   19.14    3.87
  -2 -12  -2   18.18    3.69
  -3 -12  -2    1.69    3.45
   3 -12   2   -0.53    2.27
   3 -12   2    5.77    3.27
  -4 -12  -2    7.17    3.85
   4 -12   2    4.04    2.22
   5 -12   2   -3.19    1.87
  -5 -12  -2    1.54    3.97
  -6 -12  -2    1.23    4.04
  -7 -12  -2   -0.92    4.07
  -8 -12  -2   10.37    4.71
  -9 -12  -2    0.89    4.55
 -10 -12  -2    9.11    5.17
 -11 -12  -2   -2.99    4.94
 -12 -12  -2   -4.99    5.13
 -13 -12  -2   -4.74    5.43
 -14 -13   2   -0.47    5.70
 -13 -13   2   -5.55    5.16
 -12 -13   2   -5.23    4.92
 -11 -13   2    3.43    4.99
 -10 -13   2   -2.45    4.38
  -9 -13   2   -4.17    4.27
  -8 -13   2   -1.74    4.19
  -7 -13   2   19.55    4.65
  -6 -13   2   19.87    4.43
  -5 -13   2    6.07    3.78
  -4 -13   2   -1.66    3.38
   4 -13  -2    8.46    2.23
   3 -13  -2    3.82    2.40
  -3 -13   2    0.71    3.33
   2 -13  -2    8.32    2.54
   2 -13  -2    6.41    2.78
  -2 -13   2    5.38    1.99
  -2 -13   2    6.15    3.34
  -2  13   2   12.57    3.00
  -1 -13   2   27.82    3.74
  -1 -13   2   19.03    3.99
   1 -13  -2   21.95    3.45
   1 -13  -2   21.54    2.70
  -1  13   2   28.08    3.64
   0 -13   2   -6.68    2.65
   0 -13  -2   -2.14    3.03
   0 -13  -2    0.59    1.95
   0 -13   2    1.47    3.25
   0  13   2    4.49    3.11
   1 -13   2   63.87    5.17
   1 -13   2   55.82    4.36
  -1 -13  -2   59.71    4.99
   2 -13   2    0.65    2.63
  -2 -13  -2    4.50    3.67
   2 -13   2    5.56    3.37
   3 -13   2    4.50    2.56
  -3 -13  -2    6.99    3.88
   3 -13   2    7.60    3.51
   4 -13   2    3.01    2.23
   4 -13   2    2.00    3.33
  -4 -13  -2    1.12    3.78
  -5 -13  -2   19.13    4.62
  -6 -13  -2    5.68    4.35
  -7 -13  -2   -2.74    4.23
  -8 -13  -2    0.21    4.50
  -9 -13  -2   16.51    5.27
 -10 -13  -2    2.49    5.00
 -11 -13  -2    6.59    5.45
 -12 -13  -2   -0.37    5.43
 -13 -14   2   -6.01    5.33
 -12 -14   2   -4.32    5.09
 -11 -14   2    0.61    4.98
 -10 -14   2    0.83    4.76
  -9 -14   2    3.86    4.75
  -8 -14   2   -6.47    4.19
  -7 -14   2   -0.31    4.26
  -6 -14   2   -6.03    3.86
  -5 -14   2   -4.10    3.65
   4 -14  -2   11.82    2.39
  -4 -14   2    6.91    3.97
  -3 -14   2    9.77    3.74
   3 -14  -2   10.72    2.87
   3 -14  -2   23.86    3.03
   2 -14  -2   -0.64    2.70
  -2 -14   2   -0.55    1.79
  -2 -14   2    0.89    3.22
   2 -14  -2   -0.10    2.40
  -1 -14   2   19.43    3.64
   1 -14  -2   15.93    2.60
   1 -14  -2   14.69    3.45
  -1  14   2   26.44    3.73
   0 -14   2   -3.27    2.82
   0 -14  -2    0.16    3.14
   0 -14   2   -2.55    3.19
   1 -14   2    0.41    2.84
  -1 -14  -2    6.74    3.59
   1 -14   2   -1.46    3.32
   2 -14   2   -0.22    3.21
   2 -14   2   -5.85    2.59
  -2 -14  -2   -0.26    3.51
  -3 -14  -2    8.25    3.91
   3 -14   2   -0.30    2.60
   3 -14   2    6.74    3.41
   4 -14   2   -2.82    2.32
  -4 -14  -2    3.15    4.08
   4 -14   2    1.43    3.31
   5 -14   2    6.17    3.35
  -5 -14  -2   -3.20    4.04
  -6 -14  -2    0.73    4.31
  -7 -14  -2   -0.32    4.36
  -8 -14  -2    4.00    4.70
  -9 -14  -2    3.13    4.85
 -10 -14  -2   11.71    5.48
 -11 -14  -2    4.18    5.42
 -12 -15   2    3.76    5.55
 -11 -15   2    0.53    5.21
 -10 -15   2   -2.89    4.80
  -9 -15   2   11.27    5.12
  -8 -15   2    1.02    4.57
  -7 -15   2   13.71    4.80
  -6 -15   2   20.22    4.81
  -5 -15   2    2.58    4.14
  -4 -15   2   15.58    4.38
  -3 -15   2   -4.82    3.46
   3 -15  -2    4.69    2.73
  -2 -15   2   11.29    3.83
   2 -15  -2   15.28    3.22
  -1 -15   2   12.26    3.62
   1 -15  -2    9.82    3.31
   0 -15  -2    6.47    3.42
   0 -15   2   -4.43    2.99
  -1 -15  -2    2.29    3.55
   1 -15   2   -6.21    2.89
   1 -15   2    1.01    3.31
   2 -15   2    0.61    2.99
  -2 -15  -2    4.96    3.75
   2 -15   2    6.97    3.51
  -3 -15  -2    3.57    3.90
   3 -15   2   -0.36    3.33
  -4 -15  -2    4.49    4.06
   4 -15   2   -1.88    3.20
  -5 -15  -2   -4.80    3.96
   5 -15   2   -0.07    3.29
  -6 -15  -2    8.66    4.55
  -7 -15  -2   -1.51    4.37
  -8 -15  -2   15.78    5.29
  -9 -15  -2   -0.02    4.89
 -10 -15  -2    2.49    5.32
 -10 -16   2   -2.96    4.86
  -9 -16   2   -4.04    4.69
  -8 -16   2   -9.19    4.49
  -7 -16   2    2.33    4.52
  -6 -16   2   -2.57    4.22
  -5 -16   2   -9.56    3.93
  -4 -16   2    1.19    4.08
  -3 -16   2   -6.09    3.69
   2 -16  -2    9.27    3.12
  -2 -16   2    2.13    3.76
  -1 -16   2   -2.85    3.41
   1 -16  -2    1.85    3.24
   0 -16  -2    0.03    3.41
   0 -16   2   -2.33    3.29
   1 -16   2   -7.40    3.02
  -1 -16  -2    4.87    3.79
  -2 -16  -2    3.35    3.78
   2 -16   2   -1.25    3.25
  -3 -16  -2    0.00    4.02
  -4 -16  -2   -5.18    3.88
  -5 -16  -2    4.13    4.42
  -6 -16  -2    6.31    4.65
  -7 -16  -2    0.00    4.67
  -8 -16  -2    3.95    5.08
  -9 -16  -2   -1.29    5.03
  -8 -17   2  -10.98    4.51
  -7 -17   2    6.35    4.84
  -6 -17   2   -2.36    4.47
  -5 -17   2   -4.24    4.23
  -4 -17   2   -0.14    4.23
  -3 -17   2   -2.72    3.86
  -2 -17   2    7.33    4.07
  -1 -17   2    1.06    3.70
   0 -17  -2    6.37    3.77
  -1 -17  -2    3.27    3.88
  -2 -17  -2    0.99    4.07
  -3 -17  -2    0.71    4.09
  -4 -17  -2   -4.78    4.13
  -5 -17  -2   -0.14    4.52
  -6 -17  -2    6.03    4.96
  -7 -17  -2    3.51    5.01
  -5 -18   2   -7.47    4.26
  -4 -18   2   -7.70    4.01
  -3 -18   2   -5.98    3.93
  -2 -18  -2    1.18    4.17
  -3 -18  -2   -1.41    4.40
  -4 -18  -2   -2.64    4.46
 -20   0   3   -3.48    4.82
 -19   0   3   -1.94    4.59
 -18   0   3   -0.49    4.49
 -17   0   3   -4.65    4.08
 -16   0   3   -4.42    3.92
 -15   0   3   -0.93    3.79
 -14   0   3    0.94    3.43
  13   0  -3    1.67    3.43
 -13   0   3    0.53    3.20
  12   0  -3    1.04    3.12
 -12   0   3    3.07    2.94
 -11   0   3   -1.46    2.59
  11   0  -3   -3.14    2.80
 -10   0   3   -1.03    2.42
  10   0  -3   -0.38    2.69
   9   0  -3    1.95    2.61
  -9   0   3    2.18    2.43
  -8   0   3   -0.18    2.16
   8   0  -3    1.91    2.54
   7   0  -3   -0.19    2.29
  -7   0   3    1.01    2.00
  -6   0   3    1.62    2.03
   6   0  -3    1.39    2.26
   5   0  -3    1.08    2.24
  -5   0   3   -0.64    2.05
   4   0  -3   -1.11    2.28
   4   0  -3   -0.25    1.70
  -4   0   3    0.52    2.03
  -3   0   3    0.22    1.46
   3   0  -3   -0.67    1.46
  -3   0   3   -2.60    1.92
   2   0  -3    0.79    0.47
  -2   0   3    0.65    1.33
  -1   0   3    0.01    1.34
   1   0  -3    0.21    0.89
   0   0  -3   -0.85    1.52
   0   0   3   -0.53    1.65
   0   0   3   -0.69    1.57
   1   0   3   -1.29    2.09
  -1   0  -3   -7.91    2.15
   2   0   3    1.02    2.17
  -2   0  -3   -3.70    2.24
  -3   0  -3   -0.18    2.16
   3   0   3    0.09    2.04
  -4   0  -3    2.06    2.16
   4   0   3    3.44    2.05
  -5   0  -3   -1.86    2.38
   5   0   3    2.07    2.14
   6   0   3    2.45    2.43
  -6   0  -3   -3.78    2.68
  -7   0  -3   -0.33    2.83
   7   0   3    1.52    2.52
  -8   0  -3   -4.68    2.89
   8   0   3    1.42    2.70
   9   0   3    1.79    2.82
  -9   0  -3    2.58    3.19
 -10   0  -3   -1.69    3.36
 -11   0  -3    2.66    3.86
 -12   0  -3   -6.82    3.97
 -13   0  -3   -3.30    4.24
 -14   0  -3    3.32    4.48
 -15   0  -3    9.87    4.85
 -16   0  -3    1.97    4.89
 -17   0  -3   -3.84    4.81
 -20  -1   3   10.49    5.35
 -20   1   3   10.45    4.90
 -19  -1   3   34.08    5.74
 -19   1   3   25.26    5.16
 -18  -1   3   -1.08    4.44
 -18   1   3   -0.49    4.23
 -17  -1   3   14.32    4.63
 -17   1   3    9.46    4.30
 -16  -1   3   45.53    5.44
 -16   1   3   55.61    5.30
 -15  -1   3    7.83    4.05
 -15   1   3    8.82    3.89
 -14  -1   3   88.65    6.57
  14  -1  -3  103.16    7.34
 -14   1   3   86.18    6.32
 -13  -1   3   -1.85    3.35
  13  -1  -3    3.01    3.42
 -13   1   3   -1.22    3.07
 -12  -1   3   76.24    5.72
  12  -1  -3   68.87    5.95
  12   1  -3   73.00    6.52
 -12   1   3   66.94    5.42
  11  -1  -3   -4.06    2.69
 -11  -1   3   -0.19    2.66
  11   1  -3   -3.04    2.82
 -11   1   3   -1.44    2.49
  10  -1  -3   16.55    3.04
 -10  -1   3   11.45    2.85
  10   1  -3   14.28    3.22
 -10   1   3   10.75    2.66
  -9  -1   3    3.92    2.51
   9  -1  -3   -4.16    2.44
   9   1  -3    1.36    2.71
  -9   1   3    2.82    2.27
   8  -1  -3   12.96    2.69
  -8  -1   3    8.60    2.52
  -8   1   3   13.01    2.35
   8   1  -3   10.63    2.92
  -7  -1   3    1.05    2.11
   7  -1  -3   -1.17    2.15
  -7   1   3   -0.57    1.85
   7   1  -3    1.92    2.46
   7   1  -3   -5.02    2.29
  -6  -1   3  129.55    5.83
  -6   1   3  124.96    5.40
   6   1  -3  119.51    6.12
   6   1  -3  130.31    6.05
   5  -1  -3   25.58    2.53
  -5  -1   3   22.14    2.65
  -5   1   3   22.63    2.45
   5   1  -3   23.62    2.04
   5   1  -3   28.58    2.99
   4  -1  -3  137.72    5.58
  -4  -1   3  139.88    6.12
  -4  -1   3  130.26    6.27
  -4  -1   3  144.09    4.96
  -4   1   3  146.01    5.47
   4   1  -3  144.58    5.01
   4   1  -3  144.51    6.26
  -3  -1   3  140.29    5.86
  -3  -1   3  146.20    4.90
  -3   1   3  143.44    4.94
   3   1  -3  147.28    5.01
  -3   1   3  136.70    5.43
  -2  -1   3    1.84    1.41
   2  -1  -3   -1.78    1.41
   2   1  -3    2.37    1.49
  -2   1   3    0.85    1.36
   1  -1  -3    6.26    1.52
  -1  -1   3    5.05    1.57
   1   1  -3    6.03    1.61
  -1   1   3    7.05    1.49
  -1   1   3    3.46    1.75
   0  -1  -3   98.04    4.82
   0  -1  -3  100.24    4.14
   0   1   3   86.90    4.29
   0   1   3   95.10    3.84
   1  -1   3   95.73    5.03
  -1  -1  -3  105.14    5.33
   1   1   3  105.71    4.45
  -2  -1  -3  160.11    6.81
   2  -1   3  148.51    6.41
  -2   1  -3  160.05    6.68
   2   1   3  153.73    6.69
   3  -1   3    5.90    2.17
  -3  -1  -3    6.17    2.38
  -3   1  -3    8.44    2.27
   3   1   3    7.52    2.21
   4  -1   3   21.97    2.47
  -4  -1  -3   21.34    2.79
   4   1   3   25.15    2.69
  -4   1  -3   23.31    2.88
   5  -1   3   36.26    3.02
  -5  -1  -3   41.36    3.66
   5   1   3   36.69    3.26
  -5   1  -3   34.54    3.33
   6  -1   3   34.67    3.21
  -6  -1  -3   29.46    3.57
  -6   1  -3   29.02    3.37
   6   1   3   32.78    3.36
   7  -1   3    5.13    2.62
  -7  -1  -3    5.43    2.96
  -7   1  -3    7.51    2.91
   7   1   3    2.80    2.65
  -8  -1  -3   39.64    4.22
   8  -1   3   48.51    3.86
   8   1   3   38.56    3.94
  -8   1  -3   46.73    4.09
   9  -1   3   14.63    3.13
  -9  -1  -3   14.90    3.58
   9   1   3   15.10    3.28
  -9   1  -3   14.53    3.36
  10  -1   3   14.51    3.40
 -10  -1  -3   18.99    4.01
 -10   1  -3   11.97    3.63
 -11  -1  -3   -0.20    3.85
 -11   1  -3   -6.29    3.52
 -12  -1  -3    2.73    4.29
 -12   1  -3    6.86    4.12
 -13  -1  -3    5.18    4.47
 -13   1  -3   -3.18    4.11
 -14  -1  -3    7.73    4.77
 -14   1  -3    8.50    4.50
 -15  -1  -3   -2.22    4.76
 -15   1  -3    4.59    4.73
 -16  -1  -3   19.90    5.60
 -16   1  -3   17.42    5.24
 -17  -1  -3    0.76    5.23
 -17   1  -3    7.45    5.13
 -20  -2   3   -8.58    5.07
 -19  -2   3   -3.28    4.85
 -19   2   3   -6.34    4.16
 -18  -2   3    1.14    4.84
 -18   2   3   -0.81    4.16
 -17  -2   3    0.90    4.51
 -17   2   3    4.39    3.95
 -16  -2   3   -1.73    4.13
 -16   2   3   -3.38    3.62
 -15  -2   3    5.37    4.13
 -15   2   3    2.22    3.64
 -14  -2   3   -2.49    3.66
  14  -2  -3    4.95    3.49
 -14   2   3   -1.87    3.26
  13  -2  -3    8.45    3.35
 -13  -2   3    1.27    3.50
 -13   2   3    4.20    3.05
  12  -2  -3    3.27    2.86
 -12  -2   3    2.28    3.14
 -12   2   3    1.94    2.74
  11  -2  -3   88.00    5.67
 -11  -2   3   83.30    5.86
  11   2  -3   90.17    6.47
 -11   2   3   86.04    5.19
  10  -2  -3    1.34    2.50
 -10  -2   3    2.98    2.71
 -10   2   3    0.43    2.23
  10   2  -3    6.19    2.97
  -9  -2   3   -1.66    2.54
   9  -2  -3   -1.35    2.38
  -9   2   3    3.39    2.11
   9   2  -3   -0.28    2.75
  -8  -2   3   34.27    3.42
  -8   2   3   43.39    3.51
   8   2  -3   41.90    4.11
   8   2  -3   38.05    3.76
  -7  -2   3   10.52    2.48
   7   2  -3   14.02    2.87
   7   2  -3   12.55    2.86
  -7   2   3   12.16    1.96
  -6  -2   3    0.83    2.19
   6   2  -3    0.75    2.38
  -6   2   3   -0.29    1.65
   6   2  -3    0.33    1.48
   6   2  -3   -0.28    2.33
   5  -2  -3   13.89    2.07
  -5  -2   3   13.91    2.58
   5   2  -3    9.24    2.65
  -5   2   3    8.52    1.92
   5   2  -3   10.49    2.67
   5   2  -3   13.43    1.73
  -4  -2   3   41.68    3.43
  -4  -2   3   42.08    3.35
   4  -2  -3   41.55    3.10
  -4  -2   3   44.01    2.75
   4   2  -3   45.84    3.62
   4   2  -3   43.31    3.12
   3  -2  -3   23.80    2.17
  -3  -2   3   28.38    2.07
  -3  -2   3   23.91    3.04
  -3   2   3   26.23    1.92
   3   2  -3   26.12    2.09
  -2  -2   3   21.06    1.94
   2  -2  -3   22.50    2.02
  -2   2   3   21.94    1.95
  -2   2   3   18.06    2.17
   2   2  -3   23.15    2.11
   1  -2  -3  281.62    8.35
  -1  -2   3  286.32    8.49
   1  -2  -3  286.89    9.73
  -1   2   3  285.35    9.85
  -1   2   3  282.71    8.28
   0  -2  -3   47.43    3.37
   0  -2  -3   45.94    3.17
   0   2   3   53.54    3.48
   0   2   3   45.82    3.18
  -1  -2  -3  114.61    5.96
   1   2   3  125.36    4.91
   1   2   3  129.37    5.51
   2  -2   3   95.87    4.87
  -2  -2  -3   92.28    5.36
   3  -2   3    0.27    1.87
  -3  -2  -3   -0.50    2.20
  -3   2  -3   -1.58    2.16
   3   2   3   -0.63    1.99
  -4  -2  -3    3.31    2.37
   4  -2   3    0.49    1.96
   4   2   3    0.03    2.16
  -4   2  -3   -2.68    2.22
  -5  -2  -3    3.36    2.56
   5  -2   3    4.89    2.21
   5   2   3    3.70    2.47
  -5   2  -3    1.65    2.48
  -6  -2  -3   86.61    5.86
   6  -2   3   83.23    5.29
   6   2   3   81.94    5.80
  -6   2  -3   87.72    5.64
   7  -2   3   15.42    2.80
  -7  -2  -3   17.12    3.36
  -7   2  -3   14.43    3.07
   7   2   3   18.82    3.18
  -8  -2  -3   16.64    3.51
   8  -2   3   17.04    2.88
   8   2   3   15.36    3.24
  -8   2  -3   13.45    3.20
  -9  -2  -3    3.21    3.28
   9  -2   3    3.04    2.69
  -9   2  -3    8.25    3.26
  10  -2   3   -4.04    2.75
 -10  -2  -3    3.44    3.60
 -10   2  -3   -0.59    3.39
  11  -2   3   -4.15    3.03
 -11  -2  -3    1.19    3.88
 -11   2  -3    3.34    3.76
 -12  -2  -3   10.58    4.42
 -12   2  -3    9.88    4.22
 -13  -2  -3    0.92    4.53
 -13   2  -3   -0.94    4.11
 -14  -2  -3    5.31    4.84
 -14   2  -3    6.46    4.47
 -15  -2  -3    2.40    5.00
 -15   2  -3    3.90    4.63
 -16  -2  -3   11.99    5.34
 -16   2  -3    9.75    4.85
 -17  -2  -3    0.09    5.48
 -17   2  -3    6.88    4.98
 -20  -3   3   -8.07    5.30
 -19  -3   3   19.60    5.77
 -19   3   3   25.66    4.72
 -18  -3   3  -12.74    4.43
 -18   3   3   -4.43    3.78
 -17  -3   3    3.83    4.81
 -17   3   3    5.65    3.89
 -16  -3   3    1.38    4.32
 -16   3   3   -0.67    3.53
 -15  -3   3   28.75    4.94
  15  -3  -3   42.07    4.55
 -15   3   3   32.71    4.14
  14  -3  -3   11.36    3.52
 -14  -3   3   -1.76    3.95
 -14   3   3    0.34    3.13
  13  -3  -3    6.43    3.25
 -13  -3   3    4.26    3.72
 -13   3   3    5.05    3.00
  12  -3  -3    4.62    2.95
 -12  -3   3    6.40    3.42
 -12   3   3    3.87    2.67
  11  -3  -3   60.05    4.82
 -11  -3   3   43.10    4.37
 -11   3   3   50.07    4.22
 -10  -3   3   19.41    3.27
 -10   3   3   19.61    2.57
  10   3  -3   16.08    3.48
  -9  -3   3   74.23    5.42
   9   3  -3   76.60    6.04
  -9   3   3   72.58    4.18
  -8  -3   3   13.36    2.94
  -8   3   3   12.71    1.95
   8   3  -3   13.06    3.13
   8   3  -3   13.45    3.16
  -7  -3   3  244.89    9.52
   7   3  -3  236.51    9.62
  -7   3   3  250.84    8.26
   7   3  -3  242.44    7.49
   7   3  -3  230.24    9.58
  -6  -3   3   38.28    3.34
   6   3  -3   36.08    3.42
   6   3  -3   39.29    3.50
  -6   3   3   40.76    2.89
   6   3  -3   40.58    3.05
  -5  -3   3  199.25    7.92
  -5  -3   3  191.71    7.91
   5   3  -3  202.51    6.09
   5   3  -3  184.79    7.99
  -4  -3   3   32.29    3.25
   4  -3  -3   29.25    2.38
  -4  -3   3   34.94    3.17
  -4  -3   3   31.74    2.48
   4   3  -3   35.96    2.75
  -3  -3   3   68.35    4.89
  -3  -3   3   80.54    3.18
   3  -3  -3   63.44    3.55
  -3  -3   3   62.76    4.89
  -3   3   3   69.42    3.66
   3   3  -3   72.92    3.52
  -2  -3   3   10.54    1.73
   2  -3  -3    8.49    1.76
   2  -3  -3    4.62    1.89
  -2   3   3    7.19    1.71
  -2   3   3    6.77    1.95
   2   3  -3    8.04    1.85
   1  -3  -3    5.41    2.11
   1  -3  -3    9.06    1.71
  -1  -3   3    6.49    1.87
  -1   3   3    7.85    2.21
  -1   3   3    8.94    1.59
   0  -3  -3   46.19    4.00
   0  -3  -3   47.53    2.95
   0   3   3   46.10    2.95
   0   3   3   43.61    4.10
  -1  -3  -3  112.41    5.77
  -1  -3  -3  115.35    4.49
   1   3   3  122.58    5.56
   1   3   3  115.68    4.39
  -2  -3  -3   30.50    2.90
   2   3   3   26.83    2.17
   3  -3   3   57.03    3.87
  -3  -3  -3   63.79    4.63
   4  -3   3    1.73    1.84
  -4  -3  -3   -0.37    2.34
   4   3   3    1.29    2.13
   5  -3   3    8.11    2.18
  -5  -3  -3    6.20    2.81
  -5   3  -3    2.95    2.57
   5   3   3    6.51    2.63
  -6  -3  -3   -2.98    2.76
   6  -3   3    2.18    2.21
  -6   3  -3    2.20    2.62
   6   3   3    2.51    2.71
   7  -3   3    8.88    2.47
  -7  -3  -3    8.51    3.18
  -7   3  -3    7.16    2.95
   7   3   3    6.46    2.88
   8  -3   3    7.72    2.60
  -8  -3  -3    4.09    3.19
  -8   3  -3   10.39    3.05
   9  -3   3   44.48    3.68
  -9  -3  -3   33.64    4.40
  -9   3  -3   42.73    4.21
 -10  -3  -3    2.29    3.74
  10  -3   3   -8.33    2.69
 -10   3  -3   -3.46    3.20
 -11  -3  -3    3.77    4.04
  11  -3   3    2.60    3.20
 -11   3  -3    7.29    3.77
 -12  -3  -3   -1.17    4.22
 -12   3  -3   -2.76    3.84
 -13  -3  -3   28.39    5.35
 -13   3  -3   33.14    4.83
 -14  -3  -3    2.36    4.71
 -14   3  -3    1.63    4.11
 -15  -3  -3   -5.05    4.94
 -15   3  -3   10.06    4.53
 -16  -3  -3    2.81    5.44
 -16   3  -3    8.55    4.62
 -17  -3  -3   11.38    5.76
 -17   3  -3   16.27    5.02
 -19  -4   3   -3.87    5.23
 -18  -4   3   -6.28    4.82
 -18   4   3    7.12    3.85
 -17  -4   3    2.73    4.76
 -17   4   3    2.48    3.44
 -16  -4   3    9.09    4.70
 -16   4   3    3.74    3.40
 -15  -4   3   12.69    4.51
 -15   4   3    5.59    3.32
 -14  -4   3   -0.44    4.04
 -14   4   3    0.83    2.93
 -13  -4   3    7.42    3.97
 -13   4   3    8.99    2.90
 -12  -4   3   12.22    3.75
 -12   4   3    6.00    2.57
 -11  -4   3    2.70    3.17
 -11   4   3    2.12    2.24
 -10  -4   3   19.79    3.51
  10   4  -3   27.96    3.92
 -10   4   3   21.08    2.35
  -9  -4   3   -0.48    2.71
  -9   4   3    0.51    1.74
   9   4  -3   -1.39    1.07
   9   4  -3    0.54    2.88
  -8  -4   3   92.69    6.19
   8   4  -3   92.09    6.53
  -8   4   3   96.59    4.15
   8   4  -3   95.75    4.22
  -7  -4   3    7.28    2.69
  -7   4   3    9.89    1.46
   7   4  -3    8.66    3.05
   7   4  -3    8.59    1.69
  -6  -4   3    4.18    2.37
   6   4  -3    4.40    1.53
  -6   4   3    2.60    1.21
   6   4  -3    0.28    1.64
   6   4  -3   -1.03    1.20
  -5  -4   3   61.31    4.95
  -4  -4   3   60.66    4.67
  -4  -4   3   57.06    4.35
  -4  -4   3   70.86    2.91
   4   4  -3   56.12    2.98
  -4   4   3   52.34    3.03
  -3  -4   3   99.01    3.87
   3  -4  -3  115.68    4.42
  -3  -4   3  107.06    5.88
  -3  -4   3  108.36    5.52
   3   4  -3  109.21    4.16
  -3   4   3  103.84    4.44
  -2  -4   3    2.63    2.69
   2  -4  -3    1.76    1.55
  -2  -4   3   -1.97    1.43
   2  -4  -3   -1.72    1.61
  -2   4   3   -1.29    1.56
   1  -4  -3   97.43    3.97
   1  -4  -3   96.70    4.72
  -1   4   3   96.87    3.80
  -1   4   3   95.81    4.68
   0  -4  -3  286.82   10.07
   0  -4  -3  288.33    8.37
   0   4   3  295.68   10.02
   0   4   3  275.38    8.18
  -1  -4  -3    3.11    1.52
  -1  -4  -3    2.84    2.00
   1   4   3    4.00    1.44
   1   4   3    3.50    2.00
  -2  -4  -3   -0.38    2.15
   2   4   3   -1.61    1.33
   2   4   3    0.53    1.45
  -3  -4  -3    0.91    2.28
   3  -4   3   -2.16    1.59
   3   4   3   -0.22    1.77
   3   4   3   -1.19    1.64
  -4  -4  -3   16.28    2.97
   4  -4   3   17.55    2.22
  -5  -4  -3   11.80    3.08
   5  -4   3   10.43    2.25
   5   4   3    1.39    1.71
  -6  -4  -3    3.10    2.98
   6  -4   3    2.84    2.08
   6   4   3    2.95    2.70
   7  -4   3   14.12    2.44
  -7  -4  -3   16.79    3.39
   7   4   3   11.27    3.04
  -7   4  -3   13.19    2.94
   8  -4   3    1.27    2.30
  -8  -4  -3    0.25    3.17
  -8   4  -3    1.56    2.76
   9  -4   3    0.17    2.45
  -9  -4  -3    1.18    3.47
  -9   4  -3    0.14    2.98
 -10  -4  -3   -1.21    3.72
  10  -4   3   -5.90    2.69
 -10   4  -3    1.36    3.32
 -11  -4  -3   -0.91    4.10
  11  -4   3   -2.65    2.88
 -11   4  -3   -1.97    3.57
  12  -4   3   -5.98    3.16
 -12  -4  -3   -3.67    4.30
 -12   4  -3   -0.11    3.75
 -13  -4  -3   -5.46    4.41
 -13   4  -3    4.00    3.99
 -14  -4  -3    1.06    4.80
 -14   4  -3    1.78    4.09
 -15  -4  -3   -8.59    4.77
 -15   4  -3    7.34    4.38
 -16  -4  -3    7.06    5.71
 -16   4  -3    3.42    4.38
 -17  -4  -3    5.76    5.79
 -19  -5   3   -5.94    5.33
 -18  -5   3   -0.76    5.25
 -17  -5   3   -6.33    4.77
 -16  -5   3   -3.51    4.47
 -16   5   3    7.06    3.24
 -15  -5   3   -0.91    4.22
 -15   5   3    3.67    2.96
 -14  -5   3   23.30    4.84
 -14   5   3   24.65    3.25
 -13  -5   3    5.46    4.06
 -13   5   3    4.34    2.62
 -12  -5   3   22.04    4.23
 -12   5   3   23.87    2.74
 -11  -5   3   16.21    3.75
  11   5  -3   14.40    2.29
 -11   5   3   13.24    2.21
 -10  -5   3    1.71    3.06
 -10   5   3    1.22    1.73
  10   5  -3    2.18    1.75
  -9  -5   3   40.45    4.06
   9   5  -3   30.10    2.32
  -9   5   3   38.47    2.78
   9   5  -3   34.63    4.10
  -8  -5   3   27.16    3.57
   8   5  -3   25.60    3.61
   8   5  -3   25.52    2.10
  -7  -5   3   88.86    5.95
   7   5  -3   80.84    3.72
  -6  -5   3   17.62    2.98
   6   5  -3   17.40    2.76
   6   5  -3   25.34    3.56
   6   5  -3   19.42    1.79
  -5  -5   3    3.28    1.27
  -5  -5   3   -0.97    2.42
  -5  -5   3    0.57    2.64
   5   5  -3   -0.15    2.53
   5   5  -3    2.40    2.71
   5   5  -3    2.74    1.37
  -4  -5   3    4.09    2.72
  -4  -5   3    8.50    2.51
  -4  -5   3    5.32    1.23
  -4   5   3    3.59    1.19
   4   5  -3    1.72    2.54
   4   5  -3    1.63    1.45
  -3  -5   3    7.60    1.44
  -3  -5   3   11.46    2.79
  -3  -5   3   11.61    2.49
   3  -5  -3   14.31    1.67
  -3   5   3   15.29    1.61
   2  -5  -3   78.93    3.69
   2  -5  -3   78.45    4.03
  -2  -5   3   72.53    4.89
  -2  -5   3   75.80    5.15
  -2  -5   3   79.19    3.51
  -2   5   3   75.74    3.86
   1  -5  -3   43.01    3.66
   1  -5  -3   35.90    2.88
  -1   5   3   43.77    3.57
   0  -5  -3   29.69    2.64
   0  -5  -3   24.87    1.91
   0   5   3   25.65    1.77
   0   5   3   28.15    2.46
  -1  -5  -3   75.02    4.71
  -1  -5  -3   69.48    3.36
   1   5   3   71.15    3.06
  -2  -5  -3   27.18    3.03
   2   5   3   26.97    2.81
   2   5   3   32.49    2.53
  -3  -5  -3   40.04    3.59
   3   5   3   40.37    2.85
   3   5   3   41.70    3.45
   4  -5   3    7.79    1.92
  -4  -5  -3    9.24    2.88
   4   5   3   10.33    2.73
   4   5   3   11.60    1.91
  -5  -5  -3   42.19    4.06
   5  -5   3   42.24    3.61
   5   5   3   44.57    3.72
   6  -5   3   17.46    2.33
  -6  -5  -3   19.35    3.51
  -7  -5  -3   12.99    3.44
   7  -5   3    9.76    2.24
   8  -5   3    4.15    2.36
  -8  -5  -3    6.39    3.51
   9  -5   3   31.08    3.16
  -9  -5  -3   32.72    4.64
 -10  -5  -3    6.55    4.11
  10  -5   3    0.55    2.78
 -10   5  -3    5.11    3.24
  11  -5   3   13.75    3.23
 -11  -5  -3   12.00    4.57
 -11   5  -3   18.29    3.85
 -12  -5  -3    5.35    4.51
  12  -5   3  -10.02    3.00
 -12   5  -3    0.59    3.53
 -13  -5  -3    7.09    4.82
 -13   5  -3   16.92    4.02
 -14  -5  -3    8.17    5.05
 -14   5  -3   17.56    4.14
 -15  -5  -3    4.14    5.22
 -15   5  -3    4.26    3.98
 -16  -5  -3   10.31    5.68
 -17  -5  -3   -0.16    5.70
 -19  -6   3    1.33    5.71
 -18  -6   3   -1.37    5.35
 -17  -6   3   -3.68    4.80
 -16  -6   3   -4.21    4.60
 -15  -6   3    0.34    4.42
 -15   6   3    3.62    2.72
 -14  -6   3   -4.08    4.12
  14   6  -3   -3.95    2.35
 -14   6   3    6.29    2.63
 -13  -6   3   17.24    4.57
  13   6  -3   17.88    2.81
 -13   6   3   21.16    2.72
 -12  -6   3   -0.17    3.61
  12   6  -3   -1.88    2.06
 -12   6   3    1.32    2.06
 -11  -6   3    8.27    3.62
  11   6  -3   11.71    2.16
 -10  -6   3   22.42    3.94
  -9  -6   3   23.81    3.78
   9   6  -3   26.05    2.14
  -8  -6   3   22.44    3.47
   8   6  -3   21.09    2.02
  -7  -6   3    5.37    2.85
   7   6  -3    6.14    2.77
   7   6  -3    7.22    1.51
  -6  -6   3   12.85    3.08
   6   6  -3   17.15    3.29
   6   6  -3   19.91    3.55
   6   6  -3   16.94    1.67
  -5  -6   3   10.67    2.80
  -5  -6   3   15.92    1.42
  -5  -6   3   16.98    3.30
   5   6  -3   14.13    3.39
   5   6  -3   10.03    1.58
   5   6  -3   13.15    3.11
  -4  -6   3   18.13    2.99
  -4  -6   3   13.24    1.47
  -4  -6   3   19.07    3.39
  -4   6   3   21.49    1.59
   4   6  -3   21.53    3.51
  -3  -6   3   -1.27    1.36
   3  -6  -3   -0.49    1.54
  -3  -6   3    1.58    2.45
  -3  -6   3   -3.36    2.58
  -3   6   3   -0.03    1.48
  -2  -6   3   44.84    2.81
   2  -6  -3   27.84    2.53
  -2  -6   3   31.47    3.04
  -2  -6   3   30.78    3.51
   2  -6  -3   31.51    2.31
  -2   6   3   33.30    2.42
   1  -6  -3   47.48    3.97
   1  -6  -3   41.58    3.11
  -1  -6   3   49.71    3.44
  -1   6   3   45.90    3.03
  -1   6   3   51.05    3.86
   0  -6  -3   65.84    4.50
   0  -6  -3   59.28    3.16
   0   6   3   62.45    4.27
  -1  -6  -3    2.05    2.32
  -1  -6  -3    1.52    1.39
   1   6   3    0.31    1.76
   1   6   3    0.30    1.25
  -2  -6  -3    3.73    2.50
   2   6   3   -0.04    1.29
   2   6   3    0.21    2.26
  -3  -6  -3   19.74    3.18
   3   6   3   22.36    3.07
   3   6   3   18.55    1.70
  -4  -6  -3    1.55    2.75
   4  -6   3   -3.02    1.60
   4   6   3    3.78    2.51
   4   6   3    1.86    1.53
  -5  -6  -3   -2.99    2.75
   5  -6   3    1.75    1.78
   5   6   3   -0.01    1.74
   5   6   3   -2.33    2.49
  -6  -6  -3    5.39    3.13
   6  -6   3    6.26    2.03
  -7  -6  -3   13.71    3.61
   7  -6   3   16.89    2.34
  -8  -6  -3   10.65    3.79
   8  -6   3    8.52    2.31
   9  -6   3   -3.12    2.28
  -9  -6  -3   -3.77    3.65
  10  -6   3    4.24    2.79
 -10  -6  -3   11.47    4.37
  11  -6   3   -5.44    2.74
 -11  -6  -3   -3.48    4.24
  12  -6   3    7.09    3.28
 -12  -6  -3   24.02    5.25
 -13  -6  -3    2.58    4.76
 -14  -6  -3    0.58    4.97
 -15  -6  -3    3.92    5.35
 -16  -6  -3   -5.91    5.38
 -19  -7   3  -10.79    5.65
 -18  -7   3  -10.07    5.18
 -17  -7   3   -3.04    5.05
 -16  -7   3    2.88    5.00
 -15  -7   3   -5.55    4.29
 -14  -7   3    4.08    4.65
  14   7  -3   -0.17    2.38
 -13  -7   3    0.90    4.17
  13   7  -3    1.05    2.22
 -12  -7   3   -3.34    3.83
  12   7  -3    0.23    2.08
 -11  -7   3    5.59    3.75
  11   7  -3   -1.32    1.22
 -10  -7   3    1.14    3.47
  10   7  -3    3.01    1.79
  -9  -7   3   88.20    6.83
   9   7  -3   92.45    4.07
  -8  -7   3   -0.17    2.86
   8   7  -3    1.81    1.48
  -7  -7   3    1.95    2.92
   7   7  -3   -0.18    1.29
   7   7  -3    1.71    2.97
  -6  -7   3    0.94    2.72
   6   7  -3    2.79    1.35
   6   7  -3   -1.16    2.85
  -5  -7   3   -1.50    2.96
  -5  -7   3    4.13    1.11
  -5  -7   3    0.68    2.57
   5   7  -3   -0.70    3.08
   5   7  -3    2.15    2.91
  -4  -7   3   40.94    3.77
  -4  -7   3   30.49    3.91
   4  -7  -3   35.25    2.70
  -4  -7   3   29.96    1.90
   4   7  -3   41.98    4.29
  -4   7   3   40.57    2.71
   3  -7  -3   40.01    3.42
  -3  -7   3   45.17    2.79
  -3  -7   3   43.72    3.75
  -3  -7   3   46.43    4.20
  -3   7   3   49.08    3.31
   2  -7  -3   87.39    4.28
  -2  -7   3   88.68    5.43
   2  -7  -3   89.44    4.75
  -2  -7   3   85.41    5.61
  -2  -7   3   86.91    3.83
  -2   7   3   84.21    4.51
  -1  -7   3   -1.48    2.61
  -1  -7   3    0.02    2.16
   1  -7  -3   -1.16    1.55
   1  -7  -3    2.45    2.10
  -1   7   3   -0.06    1.85
  -1   7   3    1.64    1.82
   0  -7  -3    5.76    1.61
   0  -7  -3    6.08    2.37
   0  -7   3    3.90    2.25
   0   7   3    8.86    2.19
  -1  -7  -3   39.06    3.48
  -1  -7  -3   35.47    2.61
   1   7   3   37.22    3.19
  -2  -7  -3   80.14    5.62
   2   7   3   74.43    5.35
   2   7   3   79.18    3.07
  -3  -7  -3   30.50    3.63
   3   7   3   29.18    2.18
   3   7   3   26.50    3.31
   4  -7   3   34.11    3.10
  -4  -7  -3   34.43    3.81
   4   7   3   32.44    3.60
   4   7   3   32.04    2.48
   5  -7   3    5.56    1.77
  -5  -7  -3   11.91    3.32
   5   7   3    4.24    2.83
   5   7   3    7.45    1.62
  -6  -7  -3   37.55    4.38
   6  -7   3   42.63    3.58
   6   7   3   41.12    3.20
   7  -7   3   -0.75    1.87
  -7  -7  -3    0.78    3.37
   7   7   3    0.92    2.00
   8  -7   3    5.68    2.19
  -8  -7  -3    5.22    3.77
  -9  -7  -3   23.70    4.72
   9  -7   3   28.59    2.93
 -10  -7  -3   12.85    4.61
  10  -7   3    7.29    2.76
 -11  -7  -3    4.39    4.56
  11  -7   3    1.16    2.73
 -12  -7  -3    1.03    4.49
 -13  -7  -3   -3.82    4.79
 -14  -7  -3    7.34    5.32
 -15  -7  -3    2.89    5.47
 -16  -7  -3   -0.75    5.74
 -18  -8   3   -2.73    5.58
 -17  -8   3   -2.71    5.27
 -16  -8   3   -4.82    4.89
 -15  -8   3    3.66    4.82
 -14  -8   3   -1.99    4.42
 -13  -8   3    6.11    4.34
  13   8  -3    6.45    2.16
 -12  -8   3    0.12    4.02
  12   8  -3   -4.67    1.49
 -11  -8   3   19.63    4.32
  11   8  -3   20.56    2.26
 -10  -8   3    8.36    3.89
  10   8  -3    0.91    1.71
  -9  -8   3    7.14    3.50
   9   8  -3    7.04    1.64
  -8  -8   3    0.63    3.22
  -7  -8   3   24.79    3.73
  -6  -8   3    6.67    3.08
   6   8  -3   14.71    3.48
  -5  -8   3   59.09    4.62
   5   8  -3   67.25    5.11
  -4  -8   3    1.97    2.92
  -4  -8   3   -0.65    2.52
  -4  -8   3   -0.66    1.20
   4  -8  -3    0.76    1.45
  -4   8   3    0.48    1.47
  -3  -8   3    2.70    2.83
  -3  -8   3    0.71    1.49
   3  -8  -3    5.83    1.88
  -3  -8   3    0.16    2.54
  -3   8   3    3.52    1.77
  -2  -8   3   -0.59    2.64
   2  -8  -3    0.40    1.79
   2  -8  -3    1.44    2.04
  -2  -8   3    2.37    2.42
  -2   8   3   -0.63    1.74
  -1  -8   3   72.14    5.23
   1  -8  -3   75.40    3.87
   1  -8  -3   73.32    4.71
  -1  -8   3   72.09    4.89
  -1   8   3   71.53    4.17
   0  -8  -3    0.54    1.52
   0  -8  -3    2.41    2.40
   0  -8   3    3.05    2.16
   0   8   3   -0.44    2.04
   0   8   3    1.53    2.15
  -1  -8  -3   12.27    2.87
  -1  -8  -3   17.36    1.68
   1  -8   3   19.96    2.64
   1   8   3    6.01    2.10
   1   8   3   15.69    2.68
  -2  -8  -3    2.52    2.73
   2  -8   3    6.49    2.28
   2   8   3    4.59    2.52
  -3  -8  -3   25.12    3.58
   3   8   3   31.74    3.52
  -4  -8  -3    2.71    3.08
   4   8   3    0.02    2.69
  -5  -8  -3    2.34    3.24
   5  -8   3    2.90    1.71
   5   8   3    6.01    1.33
  -6  -8  -3   -1.28    3.29
   6  -8   3    2.91    1.77
   6   8   3    2.73    1.50
  -7  -8  -3   12.90    4.00
   7  -8   3    9.88    2.02
   7   8   3    6.79    1.89
  -8  -8  -3   28.39    4.75
   8  -8   3   29.38    2.66
   8   8   3   27.91    2.63
   9  -8   3    3.29    2.26
  -9  -8  -3    7.76    4.38
   9   8   3    2.33    2.30
 -10  -8  -3    3.16    4.45
  10  -8   3   -0.79    2.43
 -11  -8  -3   -2.15    4.42
 -12  -8  -3   34.11    5.87
 -13  -8  -3   17.05    5.57
 -14  -8  -3   -1.83    5.20
 -15  -8  -3    8.58    5.81
 -16  -8  -3   -4.04    5.74
 -18  -9   3   -6.73    5.88
 -17  -9   3   -4.80    5.53
 -16  -9   3   -1.15    5.15
 -15  -9   3   -0.85    4.91
 -14  -9   3   -4.14    4.51
 -13  -9   3    0.92    4.40
 -12  -9   3    7.28    4.34
  12   9  -3    7.70    1.93
 -11  -9   3    9.67    4.25
  11   9  -3    7.32    1.82
 -10  -9   3    4.32    3.94
  -9  -9   3   58.59    5.43
  -8  -9   3    4.17    3.40
  -7  -9   3    1.94    3.23
  -6  -9   3    3.14    3.02
  -5  -9   3    5.63    2.99
   5   9  -3   10.88    3.31
   4  -9  -3    1.17    1.61
  -4  -9   3   -1.55    2.66
  -4  -9   3    0.79    1.24
  -4  -9   3    4.46    3.03
  -4   9   3   -0.24    1.68
   3  -9  -3    3.64    1.95
  -3  -9   3   -0.65    1.48
  -3  -9   3    4.68    2.95
  -3  -9   3   -0.54    2.47
  -3   9   3    0.99    1.75
  -2  -9   3    4.51    2.79
  -2  -9   3    5.83    2.53
   2  -9  -3    5.61    1.96
   2  -9  -3    4.78    2.12
  -2   9   3    2.69    1.78
  -1  -9   3    9.63    2.53
   1  -9  -3   12.74    2.52
  -1  -9   3    9.32    3.22
   1  -9  -3   11.68    1.96
  -1   9   3    9.64    2.33
  -1   9   3   11.08    2.46
   0  -9  -3   58.75    3.32
   0  -9  -3   52.73    4.85
   0  -9   3   56.86    5.01
   0  -9   3   50.09    4.48
   0   9   3   53.33    4.21
   0   9   3   53.74    4.72
  -1  -9  -3    3.80    2.70
   1  -9   3    6.13    2.33
  -1  -9  -3    5.75    1.46
   1   9   3   -1.68    1.64
   1   9   3    3.64    2.44
  -2  -9  -3   19.63    3.38
   2  -9   3   19.28    2.65
   2   9   3   21.92    3.23
   2   9   3   19.27    3.12
  -3  -9  -3    5.28    2.99
   3  -9   3    4.08    2.20
   3   9   3    4.40    2.66
  -4  -9  -3   10.56    3.43
  -5  -9  -3   -3.57    3.25
   5  -9   3    0.23    1.62
   6  -9   3    3.63    1.79
  -6  -9  -3    2.54    3.66
   7  -9   3    4.49    1.82
  -7  -9  -3    0.10    3.83
   8  -9   3   82.02    4.33
  -8  -9  -3   68.99    6.35
   8   9   3   80.51    3.67
   9  -9   3   23.47    2.53
  -9  -9  -3   22.91    5.03
   9   9   3   28.62    2.51
 -10  -9  -3    2.80    4.59
  10   9   3    4.98    2.20
 -11  -9  -3    9.35    4.95
  11   9   3   12.47    2.63
 -12  -9  -3    4.89    5.11
 -13  -9  -3    5.19    5.31
 -14  -9  -3    7.98    5.57
 -15  -9  -3    8.23    5.86
 -17 -10   3  -10.71    5.56
 -16 -10   3    7.13    5.48
 -15 -10   3   -3.83    5.01
 -14 -10   3   -5.85    4.59
 -13 -10   3    1.39    4.58
 -12 -10   3   -1.69    4.21
 -11 -10   3    3.13    4.22
 -10 -10   3   -2.01    3.93
  -9 -10   3   -4.29    3.62
  -8 -10   3   13.15    3.98
  -7 -10   3    9.15    3.61
  -6 -10   3   29.99    4.11
  -5 -10   3    2.36    3.07
  -4 -10   3    5.27    3.08
  -4 -10   3   11.62    3.53
   4 -10  -3    6.39    1.91
  -4  10   3    5.73    1.95
   3 -10  -3    7.32    2.26
   3 -10  -3    9.73    2.23
  -3 -10   3   14.98    3.36
  -3 -10   3    6.41    1.66
  -3 -10   3    6.56    2.91
  -3  10   3    8.49    2.11
  -2 -10   3    2.50    2.60
  -2 -10   3    2.12    2.89
   2 -10  -3    2.02    2.19
   2 -10  -3    0.08    1.98
  -2  10   3   -1.98    1.43
   1 -10  -3   11.29    2.69
   1 -10  -3   16.79    2.15
  -1 -10   3   14.25    2.71
  -1 -10   3   12.26    3.29
  -1  10   3   20.05    2.73
   0 -10  -3    0.96    2.52
   0 -10  -3    4.01    1.75
   0 -10   3   -0.79    2.38
   0 -10   3    5.03    3.14
   0  10   3    2.49    2.02
   0  10   3    2.69    2.43
  -1 -10  -3    4.21    2.81
   1 -10   3    5.64    2.46
  -1 -10  -3    6.32    1.55
   1  10   3    5.72    2.69
   1  10   3    6.01    2.80
   2 -10   3   39.54    3.34
  -2 -10  -3   41.58    4.11
   2  10   3   43.55    4.08
   2  10   3   39.40    3.96
  -3 -10  -3    9.20    3.44
   3 -10   3   11.56    2.45
   4 -10   3    2.51    2.16
  -4 -10  -3    4.20    3.47
  -5 -10  -3   15.54    4.11
   5 -10   3   19.50    2.45
   5 -10   3   19.99    2.10
   6 -10   3   -0.06    1.66
  -6 -10  -3    2.03    3.86
  -7 -10  -3   24.18    4.79
  -8 -10  -3   47.06    5.76
  -9 -10  -3    3.54    4.49
 -10 -10  -3    6.56    4.70
 -11 -10  -3   12.24    5.21
 -12 -10  -3   18.72    5.50
 -13 -10  -3    7.33    5.65
 -14 -10  -3    7.59    5.76
 -16 -11   3   -8.73    5.41
 -15 -11   3   -9.87    5.08
 -14 -11   3   -2.08    4.84
 -13 -11   3   -4.46    4.73
 -12 -11   3   16.14    5.13
 -11 -11   3   -4.29    4.24
 -10 -11   3   29.76    5.08
  -9 -11   3    4.67    4.03
  -8 -11   3    2.43    3.87
  -7 -11   3   -1.37    3.51
  -6 -11   3   13.06    3.76
  -5 -11   3    1.19    3.27
   4 -11  -3   19.18    2.31
  -4 -11   3   17.37    3.62
  -4  11   3   20.17    2.47
  -3 -11   3    6.75    1.72
   3 -11  -3   12.11    2.43
  -3 -11   3    6.95    3.14
  -3 -11   3   13.76    3.49
   3 -11  -3    7.55    2.35
  -3  11   3   -0.37    1.45
  -2 -11   3   57.01    5.04
  -2 -11   3   51.92    3.52
  -2 -11   3   58.08    5.33
   2 -11  -3   55.14    3.46
   2 -11  -3   53.94    4.59
  -2  11   3   52.87    4.73
   1 -11  -3   -1.33    1.90
  -1 -11   3    2.52    2.57
   1 -11  -3   -0.41    2.55
  -1 -11   3    2.29    3.23
  -1  11   3   -0.07    2.46
   0 -11   3   16.90    3.79
   0 -11  -3   13.39    2.02
   0 -11  -3   13.40    3.19
   0 -11   3   12.69    2.86
   0  11   3   14.74    2.97
   1 -11   3   29.90    3.21
  -1 -11  -3   21.25    1.90
   1 -11   3   25.37    3.98
  -1 -11  -3   23.58    3.67
   1  11   3   25.07    3.52
   1  11   3   30.11    3.76
   2 -11   3   -0.68    2.42
  -2 -11  -3    0.53    3.15
   2  11   3   -0.56    2.96
   3 -11   3    9.19    2.50
  -3 -11  -3    7.40    3.65
   4 -11   3   -0.19    2.21
  -4 -11  -3    0.04    3.53
   5 -11   3    6.54    2.27
  -5 -11  -3    4.89    3.90
   6 -11   3    4.04    2.06
   6 -11   3    4.75    1.74
  -6 -11  -3    2.45    4.02
  -7 -11  -3   15.51    4.67
  -8 -11  -3    5.31    4.49
  -9 -11  -3   -0.32    4.57
 -10 -11  -3   -4.74    4.62
 -11 -11  -3    3.84    5.05
 -12 -11  -3   12.44    5.66
 -13 -11  -3    1.62    5.41
 -14 -11  -3    4.71    5.87
 -15 -12   3    6.26    5.72
 -14 -12   3   -3.56    5.08
 -13 -12   3    6.35    5.25
 -12 -12   3   -0.59    4.95
 -11 -12   3   -4.31    4.41
 -10 -12   3   -7.75    4.04
  -9 -12   3   -1.33    4.06
  -8 -12   3    4.31    3.99
  -7 -12   3    4.24    3.90
  -6 -12   3    3.90    3.70
  -5 -12   3   30.01    4.42
   5 -12  -3   33.30    3.03
   4 -12  -3    6.10    2.17
  -4 -12   3    9.45    3.57
  -3 -12   3   41.20    4.35
   3 -12  -3   39.72    3.35
  -3 -12   3   40.10    2.98
  -3 -12   3   39.53    4.68
   3 -12  -3   35.97    3.35
  -3  12   3   36.47    3.33
   2 -12  -3   32.62    3.48
  -2 -12   3   36.74    4.57
  -2 -12   3   35.09    3.96
  -2 -12   3   34.76    2.79
   2 -12  -3   29.83    3.05
  -2  12   3   35.00    3.54
   1 -12  -3   19.82    3.28
  -1 -12   3   15.00    3.82
  -1 -12   3   10.57    3.05
   1 -12  -3   17.94    2.49
  -1  12   3   13.56    3.12
   0 -12  -3   29.20    2.45
   0 -12  -3   24.52    3.62
   0 -12   3   25.61    4.14
   0 -12   3   28.06    3.49
   0  12   3   30.12    3.79
   1 -12   3    0.09    2.67
   1 -12   3    5.85    3.63
  -1 -12  -3    4.72    3.23
   1  12   3    5.78    3.19
   1  12   3    9.37    3.37
   2 -12   3    9.03    2.76
   2 -12   3   12.50    3.70
  -2 -12  -3   12.35    3.64
  -3 -12  -3   28.45    4.44
   3 -12   3   28.79    3.15
   4 -12   3   11.15    2.51
  -4 -12  -3   11.19    4.03
   5 -12   3   -0.82    2.08
  -5 -12  -3   -2.09    3.85
  -6 -12  -3   -3.87    3.98
  -7 -12  -3   15.37    4.76
  -8 -12  -3    4.81    4.58
  -9 -12  -3   -0.04    4.69
 -10 -12  -3    0.78    5.03
 -11 -12  -3   -3.97    5.06
 -12 -12  -3   -0.45    5.33
 -13 -12  -3   -0.56    5.62
 -14 -13   3   -4.03    5.35
 -13 -13   3   -5.71    5.14
 -12 -13   3   -5.15    4.89
 -11 -13   3   -2.55    4.77
 -10 -13   3   -1.86    4.53
  -9 -13   3    0.88    4.38
  -8 -13   3   -1.08    3.95
  -7 -13   3   23.25    4.67
  -6 -13   3    4.12    3.76
  -5 -13   3    7.35    3.78
   4 -13  -3    2.46    2.67
   4 -13  -3    1.64    2.19
  -4 -13   3    3.87    3.51
   3 -13  -3   12.15    2.83
   3 -13  -3    8.06    2.75
  -3 -13   3    9.58    1.80
  -3 -13   3    8.93    3.57
  -3  13   3   16.68    2.95
  -2 -13   3    2.23    2.14
  -2 -13   3    4.53    3.42
  -2 -13   3    0.63    3.10
   2 -13  -3    3.18    2.49
   2 -13  -3    3.68    2.87
  -2  13   3    5.34    2.94
   1 -13  -3    4.51    3.00
   1 -13  -3    1.04    2.22
  -1 -13   3   -4.26    2.74
  -1 -13   3    1.78    3.48
  -1  13   3    0.45    2.91
   0 -13  -3   -2.16    1.86
   0 -13  -3   -0.46    3.09
   0 -13   3   -2.32    2.71
   0 -13   3   -0.89    3.43
   0  13   3   -3.06    3.02
  -1 -13  -3   15.59    3.84
   1 -13   3   15.60    3.16
   1 -13   3   15.62    4.03
   2 -13   3    2.93    3.55
  -2 -13  -3   -2.78    3.44
   2 -13   3   -2.74    2.65
  -3 -13  -3    5.57    3.92
   3 -13   3    5.59    3.51
   3 -13   3    5.05    2.60
   4 -13   3   -5.89    2.22
  -4 -13  -3    2.22    3.89
   5 -13   3   -2.55    2.10
  -5 -13  -3    0.82    4.07
  -6 -13  -3   -2.03    4.07
  -7 -13  -3   10.05    4.71
  -8 -13  -3   -0.67    4.63
  -9 -13  -3   -5.18    4.64
 -10 -13  -3   -1.34    5.24
 -11 -13  -3    3.43    5.56
 -12 -13  -3   -7.08    5.36
 -13 -14   3   -6.38    5.19
 -12 -14   3   -3.64    5.12
 -11 -14   3   -7.20    4.77
 -10 -14   3    3.79    4.97
  -9 -14   3   -5.36    4.26
  -8 -14   3   12.18    4.69
  -7 -14   3    7.14    4.29
  -6 -14   3    9.46    4.24
  -5 -14   3    7.43    3.90
   4 -14  -3   37.99    3.24
  -4 -14   3   42.36    4.99
   4 -14  -3   38.57    3.82
  -3 -14   3    1.28    3.55
   3 -14  -3    0.50    2.61
   3 -14  -3    3.33    2.70
   2 -14  -3    3.00    2.51
  -2 -14   3   14.47    3.54
  -2 -14   3    1.47    3.59
  -2 -14   3   10.17    2.22
   2 -14  -3    7.82    3.07
  -2  14   3   11.14    3.09
  -1 -14   3    7.05    3.24
  -1 -14   3    6.35    3.69
   1 -14  -3    9.76    3.29
  -1  14   3   11.73    3.45
   0 -14  -3   18.58    3.79
   0 -14   3   16.65    4.05
   0 -14   3   17.20    3.42
   1 -14   3    8.82    3.04
  -1 -14  -3    9.27    3.64
   1 -14   3   10.90    3.84
   2 -14   3   26.78    4.34
   2 -14   3   27.97    3.45
  -2 -14  -3   20.68    4.31
   3 -14   3   13.37    3.89
   3 -14   3    6.45    2.77
  -3 -14  -3    5.16    3.98
   4 -14   3   13.31    3.89
  -4 -14  -3   11.31    4.31
   4 -14   3   10.52    2.67
  -5 -14  -3    0.09    4.12
  -6 -14  -3    5.73    4.52
  -7 -14  -3    5.27    4.69
  -8 -14  -3    2.53    4.92
  -9 -14  -3   -0.46    4.99
 -10 -14  -3    6.83    5.49
 -11 -14  -3    1.31    5.63
 -12 -15   3  -11.91    5.06
 -11 -15   3   -5.21    5.05
 -10 -15   3   -2.95    4.89
  -9 -15   3   -6.07    4.53
  -8 -15   3   -1.66    4.46
  -7 -15   3   -2.03    4.14
  -6 -15   3   -5.25    3.88
  -5 -15   3   -1.96    3.85
  -4 -15   3   -4.42    3.67
   3 -15  -3    1.64    2.75
  -3 -15   3    0.63    3.44
  -2 -15   3    1.57    3.39
   2 -15  -3    6.72    3.17
  -1 -15   3   -0.06    3.56
  -1 -15   3    2.96    3.17
   1 -15  -3    1.85    3.23
   0 -15   3    1.49    3.08
   0 -15   3    2.02    3.64
   0 -15  -3    8.47    3.60
   1 -15   3   -6.96    2.78
  -1 -15  -3    3.90    3.71
   1 -15   3   -0.42    3.41
   2 -15   3    2.21    3.50
   2 -15   3   -3.98    2.78
  -2 -15  -3    0.73    3.74
  -3 -15  -3   -0.44    3.87
   3 -15   3   -4.22    3.34
  -4 -15  -3    2.26    4.07
   4 -15   3   -3.21    3.30
   5 -15   3    6.33    3.69
  -5 -15  -3   -0.80    4.28
  -6 -15  -3    4.25    4.63
  -7 -15  -3    4.25    4.79
  -8 -15  -3    1.95    4.89
  -9 -15  -3   -2.12    4.98
 -10 -16   3   20.64    5.69
  -9 -16   3   -7.19    4.68
  -8 -16   3    7.95    5.02
  -7 -16   3   -1.24    4.50
  -6 -16   3  -10.52    4.11
  -5 -16   3   -5.10    3.91
  -4 -16   3    4.16    4.17
  -3 -16   3   13.08    4.29
  -2 -16   3    0.65    3.60
   2 -16  -3    2.36    3.15
  -1 -16   3   -1.40    3.41
   1 -16  -3    1.95    3.34
   0 -16   3   16.23    4.19
   0 -16  -3   10.11    3.85
   0 -16   3   -0.26    3.36
   1 -16   3  -10.22    2.96
  -1 -16  -3    3.01    3.73
   1 -16   3   -0.77    3.60
   2 -16   3    6.69    3.79
  -2 -16  -3    2.77    3.88
  -3 -16  -3    8.69    4.29
   3 -16   3    0.07    3.58
  -4 -16  -3   -3.02    4.22
  -5 -16  -3   20.75    5.08
  -6 -16  -3    2.15    4.68
  -7 -16  -3   21.93    5.57
  -8 -16  -3   -0.03    5.08
  -8 -17   3   -3.30    4.66
  -7 -17   3  -11.60    4.46
  -6 -17   3  -10.10    4.24
  -5 -17   3   -6.84    4.32
  -4 -17   3  -14.34    3.89
  -3 -17   3    6.26    4.24
  -2 -17   3   -0.56    3.88
  -1 -17   3   -3.71    3.64
   0 -17  -3    8.13    3.90
  -1 -17  -3    4.98    4.04
  -2 -17  -3    4.19    4.10
  -3 -17  -3    4.76    4.31
  -4 -17  -3    3.07    4.33
  -5 -17  -3    0.96    4.58
  -6 -17  -3   -2.95    4.57
  -5 -18   3   -9.16    4.35
  -4 -18   3  -10.60    4.10
  -3 -18   3   18.47    4.90
  -2 -18  -3    6.25    4.30
  -3 -18  -3   -4.92    4.36
 -20   0   4   -4.96    4.69
 -19   0   4    2.46    4.57
 -18   0   4   23.05    5.01
 -17   0   4    2.65    4.29
 -16   0   4    9.76    4.16
 -15   0   4   14.43    4.06
 -14   0   4    6.37    3.58
 -13   0   4   30.53    3.87
  13   0  -4   39.23    4.54
 -12   0   4    3.90    2.90
  12   0  -4    7.05    3.25
  11   0  -4    0.19    2.95
 -11   0   4    1.83    2.69
  10   0  -4  108.90    6.61
 -10   0   4  110.43    5.81
   9   0  -4   24.77    3.58
  -9   0   4   20.05    2.94
  -8   0   4    8.71    2.45
   8   0  -4    8.18    2.79
  -7   0   4    4.72    2.31
   7   0  -4   -0.51    1.36
   7   0  -4    2.61    2.47
   6   0  -4   25.55    2.19
   6   0  -4   27.65    3.04
  -6   0   4   25.00    2.79
  -5   0   4   67.82    4.28
   5   0  -4   62.46    3.51
   5   0  -4   60.34    4.60
   4   0  -4  126.50    5.02
  -4   0   4  122.25    5.71
  -4   0   4  127.65    4.81
  -3   0   4    0.31    1.82
   3   0  -4    3.65    1.53
  -2   0   4   19.42    2.20
  -1   0   4  336.36    9.92
   1   0  -4  338.46    9.95
   0   0   4   86.15    4.44
   0   0   4   91.13    5.21
   1   0   4   -1.54    2.16
  -1   0  -4    3.12    2.48
  -2   0  -4   26.77    3.07
   2   0   4   23.36    2.65
   3   0   4   -0.50    2.16
  -3   0  -4   -0.01    2.33
  -4   0  -4   12.66    2.86
   4   0   4    7.31    2.39
  -5   0  -4   69.42    5.43
   5   0   4   63.99    5.14
   6   0   4    6.30    2.62
  -6   0  -4    1.76    2.94
  -7   0  -4    9.92    3.25
   7   0   4    8.40    2.87
  -8   0  -4   -1.72    3.01
   8   0   4    1.34    2.73
  -9   0  -4    4.00    3.47
 -10   0  -4   10.56    3.96
 -11   0  -4    3.49    4.13
 -12   0  -4    2.74    4.17
 -13   0  -4   70.47    6.46
 -14   0  -4   24.83    5.32
 -15   0  -4   17.09    5.41
 -16   0  -4   10.82    5.52
 -17   0  -4    7.45    5.56
 -20  -1   4    0.38    5.00
 -20   1   4    4.27    4.67
 -19  -1   4   -6.57    4.64
 -19   1   4   -2.78    4.34
 -18  -1   4   -3.55    4.38
 -18   1   4    5.11    4.34
 -17  -1   4   -3.45    4.08
 -17   1   4    2.28    4.03
 -16  -1   4   -6.49    3.86
 -16   1   4   -0.37    3.79
 -15  -1   4    7.77    3.94
 -15   1   4    3.63    3.70
 -14  -1   4    3.41    3.54
  14  -1  -4   16.14    4.02
 -14   1   4    3.67    3.43
  13  -1  -4   20.20    3.86
 -13  -1   4   17.42    3.63
 -13   1   4   17.16    3.40
 -12  -1   4   15.09    3.31
  12  -1  -4   24.44    3.64
 -12   1   4   12.59    3.02
  12   1  -4   17.30    3.72
  11  -1  -4    3.39    2.88
 -11  -1   4    2.29    2.75
  11   1  -4    3.33    3.13
 -11   1   4   -0.55    2.41
 -10  -1   4   -0.67    2.59
 -10   1   4   -0.78    2.34
  10   1  -4   -5.44    2.85
  -9  -1   4    2.44    2.55
   9   1  -4    1.94    2.84
   9   1  -4    5.20    2.98
  -9   1   4    1.95    2.33
   8  -1  -4   -2.32    2.35
  -8  -1   4    3.46    2.51
   8   1  -4    0.97    2.77
  -8   1   4    2.25    2.24
   8   1  -4    2.05    1.81
   7  -1  -4   58.33    4.22
  -7  -1   4   61.45    4.71
   7   1  -4   52.81    4.72
  -7   1   4   58.88    4.14
   6  -1  -4   34.98    2.98
  -6  -1   4   33.66    3.13
   6   1  -4   31.93    2.34
   6   1  -4   32.65    3.37
  -6   1   4   30.17    2.81
  -5  -1   4    6.92    1.81
  -5  -1   4    5.45    2.47
   5  -1  -4    6.86    2.45
  -5   1   4    6.54    2.08
   5   1  -4    7.39    2.74
   5   1  -4    7.05    1.76
  -4  -1   4   31.56    2.33
  -4  -1   4   30.12    3.18
   4   1  -4   33.27    2.43
  -4   1   4   32.07    2.71
  -4   1   4   28.86    2.38
  -3  -1   4  138.38    5.11
   3  -1  -4  134.24    5.37
  -3   1   4  140.89    5.13
   3   1  -4  144.24    5.38
   2  -1  -4    0.77    1.85
  -2  -1   4    4.88    2.00
   2   1  -4    1.63    1.93
  -2   1   4    1.73    1.85
   1  -1  -4    0.89    1.95
  -1  -1   4    2.26    2.06
   1   1  -4   -1.29    1.79
  -1   1   4    1.80    1.98
  -1   1   4   -1.80    2.22
   0  -1  -4  107.31    5.54
   0  -1   4   92.65    4.62
   0  -1  -4   95.94    4.86
   0   1   4  102.82    4.72
   1  -1   4   13.39    2.38
  -1  -1  -4   13.23    2.76
   1   1   4    9.40    2.02
   1   1   4    9.32    2.25
  -2  -1  -4    2.03    2.37
   2  -1   4    0.89    2.08
   2   1   4    1.21    2.21
  -2   1  -4   -1.46    2.30
  -3  -1  -4   54.22    4.63
   3  -1   4   52.65    4.24
  -3   1  -4   51.65    4.69
   3   1   4   53.49    4.49
   4  -1   4    3.43    2.31
  -4  -1  -4    5.34    2.57
   4   1   4    2.09    2.32
  -4   1  -4    3.23    2.60
   5  -1   4   27.21    3.00
  -5  -1  -4   23.02    3.37
  -5   1  -4   24.64    3.43
   5   1   4   26.69    3.17
   6  -1   4    7.85    2.65
  -6  -1  -4    8.61    3.17
   6   1   4   11.19    2.93
  -6   1  -4    6.92    3.13
  -7  -1  -4    5.67    3.23
   7  -1   4    5.28    2.68
  -7   1  -4    3.09    3.04
   7   1   4    1.99    2.85
   8  -1   4    4.53    2.79
  -8  -1  -4    5.33    3.35
  -8   1  -4    7.01    3.32
   8   1   4    6.60    2.95
  -9  -1  -4    2.10    3.58
   9  -1   4    0.39    2.95
  -9   1  -4    1.00    3.40
 -10  -1  -4   20.06    4.48
 -10   1  -4   17.73    4.15
 -11  -1  -4    1.06    4.19
 -11   1  -4    1.42    4.02
 -12  -1  -4   -0.70    4.40
 -12   1  -4   -0.63    4.23
 -13  -1  -4   -1.39    4.34
 -13   1  -4    4.04    4.58
 -14  -1  -4    4.59    4.72
 -14   1  -4   -0.17    4.62
 -15  -1  -4    0.31    4.83
 -15   1  -4   -0.08    4.76
 -16  -1  -4    5.18    5.19
 -16   1  -4   -0.48    4.88
 -17  -1  -4    1.92    5.54
 -17   1  -4    9.93    5.40
 -20  -2   4   -4.50    5.06
 -20   2   4    5.29    4.66
 -19  -2   4   -3.88    4.76
 -19   2   4    7.18    4.34
 -18  -2   4   24.60    5.36
 -18   2   4   31.16    4.71
 -17  -2   4   10.46    4.54
 -17   2   4    6.33    4.02
 -16  -2   4   13.20    4.40
 -16   2   4    8.31    3.94
 -15  -2   4    5.88    4.02
 -15   2   4    6.82    3.61
 -14  -2   4    6.00    3.76
 -14   2   4    8.19    3.31
 -13  -2   4   12.98    3.61
 -13   2   4    9.82    3.18
 -12  -2   4    5.46    3.12
 -12   2   4    1.64    2.58
 -11  -2   4   11.43    3.16
 -11   2   4   16.51    2.75
  11   2  -4   15.95    3.57
 -10  -2   4   19.17    3.23
 -10   2   4   16.01    2.56
  10   2  -4   17.63    3.45
  -9  -2   4   -0.09    2.53
   9   2  -4   -2.68    2.86
  -9   2   4   -1.60    2.06
   9   2  -4   -1.08    1.84
   8  -2  -4  118.26    5.93
  -8  -2   4  121.22    6.43
  -8   2   4  120.10    5.45
   8   2  -4  110.41    6.42
   8   2  -4  115.15    6.84
   7  -2  -4   18.27    2.62
  -7  -2   4   18.37    2.90
   7   2  -4   22.94    3.27
   7   2  -4   17.13    1.99
  -7   2   4   13.66    2.17
  -6  -2   4    3.77    2.45
  -6  -2   4    0.31    2.28
   6  -2  -4    1.39    2.03
   6   2  -4   -1.85    2.42
   6   2  -4    0.42    1.47
  -5  -2   4   67.79    4.84
  -5  -2   4   63.57    4.65
  -5  -2   4   70.37    3.47
   5  -2  -4   60.55    3.92
   5  -2  -4   61.14    3.56
   5   2  -4   67.26    3.63
   5   2  -4   67.57    4.86
   4  -2  -4   45.63    3.31
  -4  -2   4   49.58    3.13
  -4  -2   4   42.78    3.60
   4   2  -4   43.98    3.42
  -4   2   4   45.30    3.24
  -3  -2   4    3.32    1.85
   3  -2  -4    2.42    1.84
  -3   2   4    6.19    1.84
   3   2  -4    4.07    1.84
   2  -2  -4    6.44    1.87
  -2  -2   4    5.69    1.99
   2   2  -4    6.80    2.05
  -2   2   4    3.47    2.16
  -2   2   4    4.17    1.90
   1  -2  -4    7.00    1.95
   1  -2  -4    3.60    2.27
  -1  -2   4    6.21    2.08
  -1   2   4    4.93    1.88
  -1   2   4    7.01    2.30
   0  -2  -4  126.62    6.13
   0  -2  -4  116.50    4.96
   0   2   4  120.02    5.73
   0   2   4  117.12    4.86
  -1  -2  -4   -0.51    2.32
   1   2   4   -1.19    1.83
   1   2   4    0.18    0.45
   2  -2   4   55.37    4.09
  -2  -2  -4   52.65    4.79
   2   2   4   51.59    3.64
  -3  -2  -4   14.92    2.69
   3  -2   4   17.09    2.39
   3   2   4   15.78    2.55
   4  -2   4   15.63    2.60
  -4  -2  -4   11.13    2.96
   4   2   4   12.43    2.70
  -4   2  -4   13.19    2.88
  -5  -2  -4   16.89    3.31
   5  -2   4   20.80    2.78
   5   2   4   19.60    3.11
  -5   2  -4   19.88    3.34
   6  -2   4   11.94    2.69
  -6  -2  -4    9.95    3.23
  -6   2  -4   10.84    3.21
   6   2   4   10.82    3.00
  -7  -2  -4   24.29    3.75
   7  -2   4   27.65    3.13
  -7   2  -4   22.94    3.51
   7   2   4   22.26    3.41
  -8  -2  -4   -1.28    3.26
   8  -2   4    0.69    2.60
  -8   2  -4   -0.22    3.14
  -9  -2  -4    1.44    3.58
   9  -2   4    4.45    2.92
  -9   2  -4    0.08    3.37
  10  -2   4   14.34    3.43
 -10  -2  -4   16.65    4.44
 -10   2  -4   16.60    4.07
 -11  -2  -4    0.87    4.24
 -11   2  -4    3.73    4.07
 -12  -2  -4    1.23    4.39
 -12   2  -4   -5.27    4.03
 -13  -2  -4   -1.36    4.53
 -13   2  -4   -1.74    4.25
 -14  -2  -4   -0.28    4.78
 -14   2  -4    5.83    4.65
 -15  -2  -4   15.52    5.46
 -15   2  -4   13.28    5.02
 -16  -2  -4    7.66    5.49
 -16   2  -4    2.60    4.87
 -17  -2  -4   14.58    5.99
 -17   2  -4   18.59    5.43
 -20  -3   4   -8.45    5.22
 -19  -3   4   -5.43    4.79
 -19   3   4    1.75    4.07
 -18  -3   4   -1.41    4.68
 -18   3   4   -4.38    3.75
 -17  -3   4   -3.06    4.35
 -17   3   4   -0.39    3.60
 -16  -3   4    0.48    4.13
 -16   3   4    2.22    3.46
 -15  -3   4   27.19    4.84
 -15   3   4   31.32    4.01
 -14  -3   4    6.98    3.99
 -14   3   4    6.60    3.19
 -13  -3   4    8.35    3.69
 -13   3   4   10.00    2.97
 -12  -3   4    4.47    3.22
 -12   3   4    2.99    2.59
 -11  -3   4   -2.07    2.91
 -11   3   4    1.04    2.20
 -10  -3   4    7.42    2.99
 -10   3   4    7.77    2.23
  10   3  -4    8.32    2.10
  10   3  -4    5.76    3.27
  -9  -3   4   11.31    3.00
   9   3  -4   14.90    2.21
   9   3  -4   18.59    3.49
  -9   3   4   14.84    2.21
  -8  -3   4   62.22    5.22
  -8   3   4   57.31    3.87
   8   3  -4   64.78    5.43
   8   3  -4   57.28    4.63
   7  -3  -4   -0.60    2.02
  -7  -3   4   -1.20    2.46
   7   3  -4   -0.24    1.59
  -7   3   4   -2.16    1.79
   7   3  -4   -1.00    2.70
  -6  -3   4    6.42    2.56
  -6  -3   4    1.17    2.53
   6  -3  -4    1.93    1.86
   6   3  -4    3.79    1.63
   6   3  -4    3.77    2.73
  -5  -3   4   10.41    1.73
   5  -3  -4    7.57    1.92
  -5  -3   4   11.03    2.61
   5  -3  -4   11.77    1.94
  -5  -3   4   14.27    2.84
   5   3  -4    1.39    1.90
   5   3  -4   10.26    1.75
  -4  -3   4    3.53    1.68
  -4  -3   4    2.88    2.62
   4  -3  -4    1.82    1.74
  -4   3   4    4.56    1.36
   4   3  -4    2.45    1.66
  -3  -3   4  120.19    4.67
   3  -3  -4  113.76    4.76
  -3  -3   4  107.40    6.10
   3   3  -4  118.89    4.64
  -3   3   4  116.05    5.17
  -3   3   4  111.55    4.58
  -2  -3   4    8.11    1.91
   2  -3  -4    4.88    1.76
  -2   3   4    4.63    2.08
  -2   3   4    6.04    1.70
   2   3  -4    3.91    1.94
  -1  -3   4    1.41    1.98
   1  -3  -4    0.09    1.78
   1  -3  -4    3.34    2.20
  -1   3   4    5.04    1.79
  -1   3   4    0.22    2.06
   0  -3  -4    5.25    1.82
   0  -3  -4    8.80    2.38
   0   3   4   10.74    2.24
   0   3   4    4.85    1.74
  -1  -3  -4   28.00    2.98
  -1  -3  -4   29.90    2.35
   1   3   4   28.99    2.65
   1   3   4   32.57    2.37
   2  -3   4   25.61    2.54
  -2  -3  -4   22.06    2.90
   2   3   4   21.86    2.38
  -3  -3  -4   12.80    2.72
   3  -3   4   14.64    2.32
   3   3   4   10.25    2.17
  -4  -3  -4    7.77    3.00
   4  -3   4   10.68    2.40
   4   3   4   11.67    2.78
   5  -3   4   15.57    2.67
  -5  -3  -4   13.17    3.31
  -5   3  -4   14.57    3.13
   5   3   4   15.56    3.07
  -6  -3  -4   30.97    3.86
   6  -3   4   39.35    3.23
   6   3   4   33.78    3.71
  -6   3  -4   30.61    3.71
   7  -3   4    2.90    2.33
  -7  -3  -4    1.06    3.04
  -7   3  -4    2.25    2.95
   7   3   4   -0.30    2.93
  -8  -3  -4   30.18    4.32
   8  -3   4   28.20    3.34
  -8   3  -4   32.31    4.01
  -9  -3  -4    0.51    3.66
   9  -3   4    0.26    2.84
  -9   3  -4   -0.66    3.37
 -10  -3  -4    7.86    4.29
  10  -3   4    2.94    3.05
 -10   3  -4    3.65    3.75
 -11  -3  -4    8.12    4.56
 -11   3  -4    7.81    4.05
 -12  -3  -4    1.66    4.56
 -12   3  -4   -1.04    4.08
 -13  -3  -4    5.60    4.91
 -13   3  -4    6.63    4.38
 -14  -3  -4    1.68    4.89
 -14   3  -4    5.43    4.40
 -15  -3  -4    7.36    5.42
 -15   3  -4   12.80    4.86
 -16  -3  -4    7.39    5.69
 -16   3  -4    9.26    4.96
 -17  -3  -4    6.77    5.88
 -17   3  -4   16.59    5.16
 -20  -4   4    0.40    5.59
 -19  -4   4   10.65    5.53
 -18  -4   4   13.31    5.26
 -18   4   4   24.86    4.11
 -17  -4   4   -1.53    4.47
 -17   4   4    0.70    3.43
 -16  -4   4  -11.06    3.96
 -16   4   4   -2.35    3.14
 -15  -4   4    1.21    4.08
 -15   4   4   -1.27    3.06
 -14  -4   4    6.98    4.01
 -14   4   4    5.69    3.02
 -13  -4   4    7.42    3.75
 -13   4   4    7.95    2.76
  13   4  -4    5.46    2.56
 -12  -4   4   22.23    4.02
 -12   4   4   21.47    2.85
  12   4  -4   26.29    2.86
 -11  -4   4   43.87    4.41
  11   4  -4   43.05    3.13
 -11   4   4   46.50    3.95
 -10  -4   4  114.53    6.95
  10   4  -4  117.33    5.21
 -10   4   4  120.83    5.27
  10   4  -4  135.63    7.71
  -9  -4   4    1.70    2.77
   9   4  -4   -3.15    2.85
   9   4  -4   -0.30    1.35
  -9   4   4    0.43    1.69
  -8  -4   4   59.21    5.39
  -8   4   4   67.90    3.68
   8   4  -4   65.02    3.54
   8   4  -4   68.18    5.03
  -7  -4   4   11.21    2.93
   7  -4  -4   10.33    2.06
   7   4  -4    9.11    1.80
  -7   4   4    9.82    1.80
   7   4  -4    9.70    3.19
  -6  -4   4    3.48    1.56
   6  -4  -4    4.67    1.73
  -6  -4   4    5.60    2.81
  -6  -4   4    4.08    2.67
   6   4  -4    6.01    1.69
  -5  -4   4   69.45    5.23
  -5  -4   4   72.48    5.13
   5  -4  -4   71.01    3.90
  -5  -4   4   72.64    3.42
   5   4  -4   72.14    3.67
  -4  -4   4   21.80    3.26
  -4  -4   4   22.64    2.98
   4  -4  -4   21.37    2.28
  -4  -4   4   26.95    1.99
  -4   4   4   20.71    2.10
   4   4  -4   21.69    2.03
  -3  -4   4   61.35    4.48
  -3  -4   4   56.45    3.04
   3  -4  -4   57.91    3.62
   3   4  -4   56.84    3.79
  -3   4   4   60.83    3.85
  -2  -4   4   12.98    1.90
   2  -4  -4   13.54    1.97
   2  -4  -4   13.15    2.17
  -2   4   4   12.18    1.79
  -2   4   4   14.83    2.16
   1  -4  -4   18.72    1.99
  -1  -4   4   13.87    2.16
   1  -4  -4   18.70    2.48
  -1   4   4   22.98    2.35
  -1   4   4   21.18    1.94
   0  -4  -4  138.89    5.17
   0  -4  -4  141.03    6.19
   0   4   4  140.38    4.99
   0   4   4  143.33    6.17
  -1  -4  -4   23.79    2.93
  -1  -4  -4   25.21    2.21
   1   4   4   24.96    2.21
  -2  -4  -4    0.93    2.43
   2   4   4    2.26    2.17
   2   4   4   -0.57    1.74
   3  -4   4   22.61    2.48
  -3  -4  -4   18.35    3.10
   3   4   4   25.98    2.97
   3   4   4   20.58    2.40
  -4  -4  -4    2.01    2.87
   4  -4   4    4.39    2.11
   4   4   4    5.33    2.13
  -5  -4  -4   92.35    6.25
   5  -4   4   76.53    4.84
   5   4   4   64.76    4.81
  -6  -4  -4   -1.01    2.85
   6  -4   4    2.60    2.14
   6   4   4    0.38    2.73
   7  -4   4   54.14    4.67
  -7  -4  -4   65.05    5.87
   8  -4   4   44.94    3.61
  -8  -4  -4   37.51    4.54
  -8   4  -4   37.77    4.14
  -9  -4  -4    6.19    3.82
   9  -4   4    4.66    2.81
  -9   4  -4    5.80    3.41
 -10  -4  -4   10.51    4.36
  10  -4   4    7.80    3.14
 -10   4  -4    9.69    3.82
 -11  -4  -4    1.69    4.42
  11  -4   4   -3.34    3.21
 -11   4  -4    5.46    3.92
 -12  -4  -4   21.72    5.27
 -12   4  -4   31.79    4.77
 -13  -4  -4    6.58    4.97
 -13   4  -4    1.05    3.98
 -14  -4  -4   13.85    5.39
 -14   4  -4   14.67    4.58
 -15  -4  -4   20.91    5.93
 -15   4  -4   12.74    4.60
 -16  -4  -4    1.65    5.55
 -16   4  -4    7.34    4.52
 -20  -5   4   -2.48    5.53
 -19  -5   4   -3.27    5.38
 -18  -5   4   -1.96    4.90
 -17  -5   4   -3.97    4.63
 -17   5   4    1.45    3.17
 -16  -5   4    1.15    4.51
 -16   5   4    6.39    3.10
 -15  -5   4    0.36    4.25
 -15   5   4    2.39    2.88
 -14  -5   4    2.34    4.05
 -14   5   4   -1.99    2.63
  14   5  -4   -1.25    2.52
 -13  -5   4    0.44    3.75
 -13   5   4   -1.49    2.43
  13   5  -4    0.84    2.36
 -12  -5   4    3.49    3.50
  12   5  -4    5.16    2.30
 -12   5   4    4.45    2.29
 -11  -5   4   16.51    3.74
  11   5  -4   16.72    2.45
 -11   5   4   19.16    2.28
 -10  -5   4    7.90    3.22
  10   5  -4    7.43    2.05
 -10   5   4    8.43    1.85
  -9  -5   4    3.63    3.05
  -9   5   4    3.66    1.53
   9   5  -4   -1.53    1.11
   9   5  -4    7.01    3.22
  -8  -5   4  174.38    8.41
  -8   5   4  179.22    6.28
   8   5  -4  184.81    6.24
   8   5  -4  191.80    8.93
  -7  -5   4   58.12    5.11
   7  -5  -4   52.01    3.30
  -7   5   4   52.81    2.95
   7   5  -4   58.14    3.46
  -6  -5   4  101.35    6.31
  -6  -5   4  105.66    6.22
  -6  -5   4  110.00    4.10
  -6   5   4  100.81    4.32
   6   5  -4  102.36    4.37
   6   5  -4   98.76    6.67
  -5  -5   4   16.83    2.94
  -5  -5   4   12.21    3.20
  -5  -5   4   16.92    1.78
   5   5  -4   20.11    3.54
   5   5  -4   12.98    1.86
  -5   5   4   14.44    1.77
  -4  -5   4   47.80    2.82
  -4  -5   4   43.06    3.64
  -4  -5   4   44.84    4.07
   4  -5  -4   43.60    2.93
  -4   5   4   48.29    3.36
   4   5  -4   44.74    3.31
  -3  -5   4   20.90    3.42
   3  -5  -4   17.56    2.13
  -3  -5   4   18.04    1.88
  -3  -5   4   18.67    2.95
   3  -5  -4   15.77    2.00
  -3   5   4   17.64    2.02
  -2  -5   4    3.39    1.67
   2  -5  -4    5.66    1.96
   2  -5  -4    3.29    1.74
  -2   5   4    5.55    1.85
   1  -5  -4    6.83    1.80
   1  -5  -4    7.89    2.27
  -1   5   4   12.53    2.07
  -1   5   4   11.63    1.74
   0  -5  -4   16.08    2.66
   0  -5  -4   14.22    1.88
   0   5   4   15.73    1.81
  -1  -5  -4    6.54    2.57
  -1  -5  -4    0.34    1.69
   1   5   4    3.73    2.20
   1   5   4    4.44    1.65
  -2  -5  -4  115.93    6.50
   2   5   4  107.90    4.52
   2   5   4  110.03    6.18
  -3  -5  -4   31.72    3.50
   3  -5   4   25.98    2.68
   3   5   4   33.66    3.36
   3   5   4   28.44    2.42
  -4  -5  -4    8.27    3.05
   4  -5   4    9.76    2.19
   4   5   4    7.23    2.75
   4   5   4    6.72    2.16
   5  -5   4   19.67    2.49
  -5  -5  -4   11.44    3.26
   5   5   4   10.29    2.53
   5   5   4   12.63    2.33
   6  -5   4   -0.02    2.15
  -6  -5  -4   -1.57    2.94
   7  -5   4    4.47    2.33
  -7  -5  -4   10.37    3.54
  -8  -5  -4   -3.76    3.40
   8  -5   4    0.03    2.39
  -9  -5  -4    0.32    3.80
   9  -5   4    3.11    2.75
  10  -5   4    6.62    3.03
 -10  -5  -4    3.82    4.19
 -11  -5  -4    7.69    4.56
  11  -5   4    3.95    3.27
  12  -5   4   -3.87    3.14
 -12  -5  -4    1.76    4.64
 -12   5  -4   -1.35    3.62
 -13  -5  -4    1.27    4.92
 -13   5  -4    8.05    3.97
 -14  -5  -4    5.74    5.46
 -14   5  -4   14.23    4.30
 -15  -5  -4    0.96    5.51
 -15   5  -4   10.95    4.30
 -16  -5  -4    4.57    5.82
 -19  -6   4   -6.31    5.33
 -18  -6   4   10.49    5.44
 -17  -6   4   -0.35    4.93
 -16  -6   4   -1.68    4.57
 -15  -6   4   -8.55    4.17
 -15   6   4    0.20    2.57
 -14  -6   4    6.30    4.28
 -14   6   4    5.35    2.45
  14   6  -4    7.36    2.63
 -13  -6   4   14.72    4.30
 -13   6   4   14.77    2.41
  13   6  -4    7.09    2.58
 -12  -6   4   12.23    4.04
  12   6  -4    9.16    2.43
 -12   6   4    8.41    2.03
 -11  -6   4   19.65    4.05
  11   6  -4   17.89    2.38
 -11   6   4   19.93    1.96
  -9  -6   4    4.64    3.09
   9   6  -4    2.35    1.77
  -8  -6   4   -0.67    2.72
   8   6  -4    0.22    1.55
  -7  -6   4    6.27    2.85
   7   6  -4    8.19    3.04
   7   6  -4    4.65    1.70
  -6  -6   4   15.83    3.46
  -6  -6   4   13.85    3.18
  -6  -6   4   18.47    1.78
   6   6  -4   16.60    1.91
  -5  -6   4   25.49    3.78
  -5  -6   4   17.85    3.21
  -5  -6   4   18.96    1.78
  -5   6   4   22.21    1.79
   5   6  -4   21.44    3.81
   5   6  -4   16.00    2.01
  -4  -6   4    6.67    3.11
   4  -6  -4    5.86    2.06
  -4  -6   4    3.14    1.51
  -4  -6   4    6.94    2.76
  -4   6   4    5.85    1.67
  -3  -6   4   60.96    3.39
   3  -6  -4   81.28    4.21
  -3  -6   4   72.13    5.55
  -3  -6   4   71.99    5.13
   3  -6  -4   62.35    4.12
  -3   6   4   68.94    4.08
   2  -6  -4   69.50    3.90
  -2  -6   4   61.92    5.32
  -2  -6   4   68.19    5.13
  -2  -6   4   67.32    3.68
   2  -6  -4   73.24    4.53
  -2   6   4   76.52    4.30
   1  -6  -4   46.30    4.28
   1  -6  -4   44.47    3.43
  -1   6   4   51.11    4.02
   0  -6  -4  212.79    6.90
   0  -6  -4  224.67    8.75
   0   6   4  217.98    6.76
  -1  -6  -4    7.01    1.81
  -1  -6  -4    9.27    2.76
   1   6   4    6.96    1.66
   1   6   4    8.19    2.50
  -2  -6  -4   33.24    3.55
   2   6   4   39.58    3.53
   2   6   4   38.93    2.92
  -3  -6  -4    9.70    3.13
   3   6   4   11.16    2.89
   3   6   4   10.57    1.89
  -4  -6  -4   21.97    3.46
   4  -6   4   23.76    2.51
   4   6   4   24.59    2.28
   4   6   4   20.67    3.34
   5  -6   4   13.20    2.24
  -5  -6  -4   10.95    3.33
   5   6   4    9.88    3.08
   5   6   4   12.13    2.24
   6  -6   4    3.34    2.11
  -6  -6  -4   -0.44    3.23
   6   6   4    1.21    2.16
  -7  -6  -4   51.14    5.02
   7  -6   4   68.47    4.57
  -8  -6  -4   23.24    4.43
   8  -6   4   30.20    3.05
   9  -6   4   20.95    3.14
  -9  -6  -4   25.50    4.73
  10  -6   4    5.19    2.94
 -10  -6  -4   10.79    4.73
  11  -6   4   -5.81    2.93
 -11  -6  -4    0.98    4.34
 -12  -6  -4   19.01    5.17
 -13  -6  -4    4.46    5.15
 -14  -6  -4    5.33    5.51
 -15  -6  -4    5.78    5.84
 -16  -6  -4   -1.47    5.85
 -19  -7   4   -9.83    5.53
 -18  -7   4    0.78    5.31
 -17  -7   4   -0.31    4.96
 -16  -7   4    0.96    4.97
 -15  -7   4   -0.83    4.41
 -14  -7   4   -1.19    4.25
  14   7  -4   -1.52    2.38
 -13  -7   4    0.38    4.02
  13   7  -4   -1.85    2.20
 -12  -7   4   -1.83    3.76
  12   7  -4    0.73    2.11
 -11  -7   4    3.24    3.61
  11   7  -4    2.75    1.77
 -10  -7   4   16.23    3.86
  10   7  -4   11.74    1.97
  -9  -7   4   -0.33    3.15
   9   7  -4    4.93    1.70
  -8  -7   4    2.59    3.00
   8   7  -4    0.74    1.58
  -7  -7   4   -1.56    2.76
   7   7  -4    1.97    3.10
   7   7  -4   -0.70    1.54
  -6  -7   4    9.99    1.52
  -6  -7   4   11.32    3.54
  -6  -7   4   10.55    3.04
   6   7  -4   11.56    1.79
  -5  -7   4   37.28    3.88
  -5  -7   4   34.58    4.20
  -5  -7   4   36.68    2.50
  -5   7   4   31.48    2.75
  -4  -7   4   30.46    3.50
   4  -7  -4   22.56    2.14
   4  -7  -4   24.12    2.56
  -4  -7   4   20.21    3.68
  -4  -7   4   18.16    1.94
  -4   7   4   26.66    2.13
  -3  -7   4    5.60    2.74
   3  -7  -4    3.56    1.98
   3  -7  -4    1.72    1.95
  -3  -7   4    1.20    3.08
  -3  -7   4   -1.17    1.68
  -3   7   4    2.27    1.79
  -2  -7   4  361.65   10.93
  -2  -7   4  353.33   13.28
   2  -7  -4  390.52   11.13
   2  -7  -4  378.29   12.82
  -2  -7   4  376.04   13.33
  -2   7   4  377.95   12.61
  -2   7   4  379.03   11.45
  -1  -7   4   15.89    2.91
   1  -7  -4   18.96    2.13
   1  -7  -4   18.84    2.79
   0  -7  -4   67.93    5.31
   0  -7  -4   76.72    3.89
   0   7   4   71.99    5.13
  -1  -7  -4   19.27    3.02
  -1  -7  -4   18.51    1.98
   1   7   4   20.20    1.85
   1   7   4   19.56    2.90
  -2  -7  -4   31.32    3.56
   2   7   4   27.08    2.00
   2   7   4   28.54    3.32
  -3  -7  -4    2.31    2.86
   3   7   4    0.98    1.51
   3   7   4    2.39    2.68
  -4  -7  -4    2.03    3.00
   4  -7   4   -2.57    1.72
   4   7   4    1.00    1.66
   4   7   4   -0.10    2.71
   5  -7   4    6.26    2.01
  -5  -7  -4    4.67    3.26
   5   7   4    7.03    1.88
  -6  -7  -4   11.22    3.64
   6  -7   4   14.05    2.32
   6   7   4   12.08    2.27
   7  -7   4    5.93    2.22
  -7  -7  -4    4.72    3.75
   7   7   4    2.21    2.35
   8  -7   4    9.63    2.47
  -8  -7  -4    8.07    4.02
   8   7   4    9.80    2.62
   9  -7   4   29.41    3.27
  -9  -7  -4   25.29    4.94
  10  -7   4   -6.39    2.64
 -10  -7  -4    1.51    4.33
 -11  -7  -4    5.38    4.60
 -12  -7  -4    1.48    4.76
 -13  -7  -4    0.70    5.11
 -14  -7  -4    2.30    5.44
 -15  -7  -4   -3.35    5.59
 -18  -8   4   -2.28    5.45
 -17  -8   4   -4.90    5.13
 -16  -8   4   -4.73    4.67
 -15  -8   4   -4.41    4.57
 -14  -8   4    0.60    4.25
 -13  -8   4    2.16    4.17
  13   8  -4    6.38    2.23
 -12  -8   4    4.10    4.25
  12   8  -4    5.90    2.12
 -11  -8   4    8.62    4.03
  11   8  -4    5.97    1.71
 -10  -8   4   13.78    3.97
  10   8  -4   16.67    2.07
  -9  -8   4   13.30    3.73
   9   8  -4    6.11    1.73
  -8  -8   4   10.76    3.40
   8   8  -4    7.49    1.68
  -7  -8   4   10.84    3.31
   7   8  -4    8.30    1.63
  -6  -8   4   34.73    2.39
  -6  -8   4   25.78    3.63
  -6  -8   4   23.74    4.09
  -5  -8   4    9.44    3.34
  -5  -8   4    7.09    1.44
  -5  -8   4    5.16    2.93
  -5   8   4    8.27    1.57
  -4  -8   4   32.26    4.11
   4  -8  -4   23.46    2.30
  -4  -8   4   28.48    3.54
  -4  -8   4   23.28    2.06
   4  -8  -4   27.76    2.71
  -4   8   4   27.24    2.25
  -3  -8   4   41.26    3.07
  -3  -8   4   38.42    4.15
   3  -8  -4   39.88    2.89
  -3  -8   4   33.37    3.64
   3  -8  -4   30.05    2.74
  -3   8   4   32.84    2.58
  -2  -8   4   28.51    3.26
  -2  -8   4   31.82    3.93
   2  -8  -4   28.29    2.94
   2  -8  -4   28.68    2.54
  -2  -8   4   30.46    2.54
  -2   8   4   28.14    2.35
  -1  -8   4   17.13    2.84
   1  -8  -4   17.59    2.83
   1  -8  -4   19.95    2.24
  -1   8   4   17.66    2.37
  -1   8   4   20.53    2.61
   0  -8   4   48.25    3.63
   0  -8  -4   50.43    4.67
   0  -8  -4   42.83    2.69
   0   8   4   47.39    3.57
  -1  -8  -4   14.76    1.85
  -1  -8  -4   13.15    3.04
   1   8   4   14.16    2.77
  -2  -8  -4   21.58    3.45
   2   8   4   20.94    3.23
   2   8   4   23.63    1.77
  -3  -8  -4   27.51    3.75
   3   8   4   31.73    2.36
   3   8   4   29.32    3.52
  -4  -8  -4   20.43    3.71
   4   8   4   18.09    1.81
  -5  -8  -4   54.44    5.04
   5  -8   4   58.25    3.98
   5   8   4   61.71    3.31
   6  -8   4   15.70    2.37
  -6  -8  -4   17.26    4.04
   6   8   4   13.33    2.04
   7  -8   4   25.48    2.76
  -7  -8  -4   25.15    4.60
   7   8   4   24.42    2.51
   8  -8   4    3.44    2.28
  -8  -8  -4   -1.32    4.05
   8   8   4   -1.90    2.28
   9  -8   4    8.21    2.63
  -9  -8  -4    7.82    4.40
   9   8   4    5.65    2.58
 -10  -8  -4    3.59    4.42
  10   8   4    7.39    2.69
 -11  -8  -4    2.43    4.66
 -12  -8  -4   -1.43    4.82
 -13  -8  -4    1.42    5.13
 -14  -8  -4   -1.03    5.51
 -15  -8  -4    9.89    6.08
 -18  -9   4   -5.49    5.47
 -17  -9   4    1.43    5.38
 -16  -9   4   -3.70    4.83
 -15  -9   4   -5.94    4.69
 -14  -9   4   -1.15    4.46
 -13  -9   4    1.83    4.34
 -12  -9   4   24.32    4.95
  12   9  -4   28.03    2.36
 -11  -9   4    0.79    3.97
  11   9  -4   -0.14    1.74
 -10  -9   4    1.83    3.78
  10   9  -4    0.33    1.65
  -9  -9   4    5.88    3.75
  -8  -9   4   57.72    5.21
  -7  -9   4    9.18    3.49
  -6  -9   4    0.54    3.00
  -6  -9   4    5.17    1.27
  -5  -9   4    4.42    3.39
  -5  -9   4   -2.72    1.29
  -5  -9   4    5.81    2.93
  -5   9   4    1.85    1.51
  -4  -9   4   17.03    3.27
   4  -9  -4   15.91    2.16
  -4  -9   4   18.15    3.77
  -4  -9   4   14.40    1.83
   4  -9  -4   16.16    2.54
  -4   9   4   13.58    2.03
  -3  -9   4   36.16    4.21
   3  -9  -4   32.08    2.86
   3  -9  -4   27.87    2.71
  -3  -9   4   33.53    2.49
  -3  -9   4   32.34    3.67
  -3   9   4   30.40    2.67
  -2  -9   4   22.67    3.77
   2  -9  -4   23.88    2.49
  -2  -9   4   28.90    2.51
   2  -9  -4   25.80    2.93
  -2  -9   4   27.24    3.29
  -1  -9   4   12.79    2.75
  -1  -9   4   13.84    3.44
   1  -9  -4   10.29    2.74
   1  -9  -4   10.17    2.07
  -1   9   4   10.61    2.48
  -1   9   4   10.37    2.32
   0  -9   4    2.78    2.40
   0  -9  -4   -0.83    2.56
   0  -9  -4   -0.66    1.69
   0   9   4   -1.17    2.37
   0   9   4   -4.56    2.06
   1  -9   4   25.67    3.00
  -1  -9  -4   20.47    3.31
  -1  -9  -4   21.87    2.03
   1   9   4   20.06    3.14
  -2  -9  -4   13.02    3.31
   2   9   4   18.40    3.18
  -3  -9  -4   -0.21    3.02
  -4  -9  -4   21.54    3.90
   4   9   4   18.24    1.58
   5  -9   4    7.48    2.04
  -5  -9  -4    5.70    3.67
   6  -9   4   16.45    2.37
  -6  -9  -4   20.39    4.34
   6   9   4   16.61    1.83
   7  -9   4    1.35    2.13
  -7  -9  -4   -0.75    3.92
   7   9   4    1.30    1.80
   8  -9   4   29.51    2.87
  -8  -9  -4   32.14    5.29
   8   9   4   35.27    2.63
  -9  -9  -4   40.75    5.63
   9   9   4   37.31    2.95
 -10  -9  -4    9.37    4.84
  10   9   4    7.81    2.52
 -11  -9  -4   16.89    5.25
  11   9   4   14.04    2.81
 -12  -9  -4    2.06    5.02
 -13  -9  -4   17.53    5.78
 -14  -9  -4   -3.51    5.42
 -17 -10   4    0.91    5.62
 -16 -10   4   -1.52    5.15
 -15 -10   4   -4.07    4.97
 -14 -10   4   -0.27    4.88
 -13 -10   4    2.27    4.68
 -12 -10   4   -2.68    4.21
 -11 -10   4   16.93    4.68
 -10 -10   4   24.21    4.66
  -9 -10   4   -2.47    3.69
  -8 -10   4   -1.83    3.41
  -7 -10   4    7.06    3.69
  -6 -10   4   -3.35    3.08
  -5 -10   4   16.13    3.53
  -5 -10   4   11.13    3.81
  -5 -10   4    8.96    1.53
  -5  10   4   10.27    1.95
   4 -10  -4    3.14    2.29
  -4 -10   4   -2.23    1.57
   4 -10  -4    1.60    1.92
  -4 -10   4   -0.23    2.82
  -4 -10   4    0.98    3.37
  -4  10   4    0.38    1.80
   3 -10  -4   38.79    3.19
  -3 -10   4   46.22    4.19
  -3 -10   4   34.28    4.38
   3 -10  -4   35.87    3.13
  -3 -10   4   42.39    3.26
  -2 -10   4    5.13    2.02
  -2 -10   4    2.04    3.03
   2 -10  -4    5.75    2.49
   2 -10  -4    3.06    2.07
  -2 -10   4    5.60    2.71
  -2  10   4    0.06    2.19
  -1 -10   4   48.38    4.79
  -1 -10   4   44.31    3.88
   1 -10  -4   43.43    3.84
   1 -10  -4   44.45    2.97
  -1  10   4   39.33    3.52
  -1  10   4   43.31    3.43
   0 -10  -4   11.77    2.02
   0 -10   4   14.67    3.72
   0 -10  -4   14.24    3.09
   0 -10   4   14.26    2.86
   0  10   4   13.64    2.87
   1 -10   4    3.02    2.51
  -1 -10  -4    1.68    2.85
  -1 -10  -4    2.18    1.63
   1  10   4   -1.83    2.56
   1  10   4   -2.15    2.55
   2 -10   4   13.11    2.72
  -2 -10  -4    7.51    3.31
   2  10   4   11.12    3.19
   2  10   4   14.75    3.26
   3 -10   4   18.24    2.83
  -3 -10  -4   18.76    3.85
  -4 -10  -4    4.19    3.64
  -5 -10  -4    1.54    3.72
   5 -10   4    4.51    1.96
   6 -10   4   -0.50    1.94
  -6 -10  -4    1.53    4.07
   7 -10   4   14.76    2.37
  -7 -10  -4   12.97    4.47
  -8 -10  -4    7.40    4.60
   8  10   4    8.04    1.70
  -9 -10  -4    2.19    4.67
   9  10   4    5.16    1.90
 -10 -10  -4   11.38    5.13
 -11 -10  -4   -2.97    4.76
 -12 -10  -4    0.67    5.17
 -13 -10  -4    7.32    5.47
 -14 -10  -4   -3.58    5.63
 -16 -11   4   -0.49    5.53
 -15 -11   4   -8.38    4.99
 -14 -11   4   -1.04    4.96
 -13 -11   4    8.43    5.00
 -12 -11   4    8.73    4.70
 -11 -11   4   -0.58    4.10
 -10 -11   4    5.35    4.24
  -9 -11   4    2.38    3.92
  -8 -11   4   -0.98    3.85
  -7 -11   4    9.80    3.83
  -6 -11   4   31.46    4.44
  -5 -11   4   10.15    3.56
  -5 -11   4   10.65    4.01
   5 -11  -4    7.83    1.85
   5 -11  -4    8.28    2.75
  -5  11   4    8.11    2.02
  -4 -11   4   23.26    2.14
  -4 -11   4   29.78    3.93
   4 -11  -4   25.73    3.07
   4 -11  -4   26.52    2.75
  -4 -11   4   29.62    4.38
  -4  11   4   26.23    2.69
  -3 -11   4    3.82    3.28
  -3 -11   4    1.09    1.92
   3 -11  -4    0.31    2.29
   3 -11  -4   -0.96    2.32
  -3 -11   4   -1.94    2.87
  -3  11   4   -2.69    2.04
  -2 -11   4    7.56    2.26
  -2 -11   4    3.76    2.79
   2 -11  -4    3.22    2.29
  -2 -11   4    4.64    3.36
   2 -11  -4    1.23    2.65
  -2  11   4    3.19    2.42
  -1 -11   4   19.62    3.22
  -1 -11   4   22.42    4.05
   1 -11  -4   21.63    3.42
   1 -11  -4   22.72    2.55
  -1  11   4   20.58    3.12
   0 -11   4    8.57    3.67
   0 -11   4   -1.08    2.71
   0 -11  -4    1.68    1.90
   0 -11  -4    3.80    3.02
   0  11   4    0.63    2.14
   0  11   4    3.38    2.73
  -1 -11  -4   43.77    4.34
  -1 -11  -4   42.61    3.19
   1 -11   4   52.21    4.06
   1  11   4   53.79    4.44
   1  11   4   39.74    4.25
   2 -11   4   -2.46    2.49
  -2 -11  -4    0.51    3.29
   2  11   4    2.01    3.21
   3 -11   4    0.87    2.46
  -3 -11  -4    0.79    3.51
  -4 -11  -4    3.38    3.90
   4 -11   4    9.44    2.63
  -5 -11  -4    7.10    4.14
   5 -11   4    4.87    1.97
   5 -11   4    2.95    2.39
   6 -11   4   34.25    2.80
   6 -11   4   45.02    3.93
  -6 -11  -4   33.86    5.25
  -7 -11  -4    3.57    4.31
  -8 -11  -4   29.99    5.42
  -9 -11  -4   12.27    5.06
 -10 -11  -4   12.55    5.27
 -11 -11  -4   10.83    5.42
 -12 -11  -4    3.01    5.37
 -13 -11  -4    0.92    5.63
 -16 -12   4   -8.13    5.48
 -15 -12   4   -6.26    5.22
 -14 -12   4  -10.13    4.93
 -13 -12   4    0.78    4.99
 -12 -12   4    6.02    4.85
 -11 -12   4    7.47    4.60
 -10 -12   4    6.29    4.34
  -9 -12   4    1.00    4.06
  -8 -12   4    4.37    3.97
  -7 -12   4   16.06    4.30
  -6 -12   4    5.86    3.69
  -5 -12   4    2.49    3.61
   5 -12  -4    8.19    2.01
   5 -12  -4    6.59    2.92
  -5  12   4   10.57    2.22
   4 -12  -4   -3.15    2.57
   4 -12  -4   -0.01    2.23
  -4 -12   4    7.95    3.70
  -4 -12   4    1.87    1.72
  -4 -12   4    2.26    3.37
  -4  12   4   -0.98    1.33
   3 -12  -4   30.41    3.29
  -3 -12   4   31.36    2.64
   3 -12  -4   25.97    3.20
  -3 -12   4   37.08    4.19
  -3 -12   4   34.81    4.70
  -3  12   4   31.17    3.26
   2 -12  -4    0.66    2.38
  -2 -12   4    2.85    3.48
  -2 -12   4    4.27    2.99
  -2 -12   4    5.68    2.29
   2 -12  -4    1.11    2.77
  -2  12   4    1.90    2.65
  -1 -12   4   11.71    3.82
   1 -12  -4    5.01    3.17
   1 -12  -4    6.57    2.31
  -1 -12   4    9.64    2.97
  -1  12   4    8.75    3.03
   0 -12  -4   20.11    2.37
   0 -12   4   19.46    3.40
   0 -12  -4    9.56    3.44
   0 -12   4   19.48    4.29
   0  12   4   16.82    3.34
   0  12   4   25.94    3.63
   1 -12   4   -2.24    2.71
   1 -12   4    0.57    3.54
  -1 -12  -4    1.30    3.24
   1  12   4    2.61    3.13
  -2 -12  -4    2.43    3.62
   2 -12   4    2.54    2.77
   3 -12   4    0.29    2.60
  -3 -12  -4    2.92    3.74
  -4 -12  -4    3.24    3.96
   4 -12   4   -0.72    2.54
   5 -12   4    1.89    2.42
  -5 -12  -4    5.34    4.14
   5 -12   4    5.69    2.03
  -6 -12  -4   -4.01    4.01
   6 -12   4   -1.12    2.20
  -7 -12  -4    2.69    4.40
  -8 -12  -4   -2.24    4.49
  -9 -12  -4    3.67    4.84
 -10 -12  -4   11.35    5.54
 -11 -12  -4   -1.16    5.23
 -12 -12  -4    3.77    5.51
 -15 -13   4   -6.01    5.51
 -14 -13   4   -6.88    5.19
 -13 -13   4   -9.28    5.02
 -12 -13   4    2.94    5.05
 -11 -13   4   -0.33    4.68
 -10 -13   4   -4.53    4.20
  -9 -13   4   -2.96    4.04
  -8 -13   4    8.03    4.49
  -7 -13   4   43.59    5.31
  -6 -13   4    8.46    3.92
   5 -13  -4    4.10    1.97
  -5 -13   4    2.93    3.59
   4 -13  -4   -0.11    2.33
  -4 -13   4   -1.44    3.35
  -4 -13   4    0.01    3.67
  -4 -13   4   -1.37    1.60
   4 -13  -4    1.17    2.76
  -4  13   4   -1.96    2.11
   3 -13  -4   24.74    3.25
  -3 -13   4   32.45    4.29
  -3 -13   4   21.35    4.36
   3 -13  -4   24.43    3.16
  -3 -13   4   28.65    2.52
  -3  13   4   23.40    3.34
  -2 -13   4    5.55    3.80
   2 -13  -4   17.04    2.81
  -2 -13   4    8.68    2.50
   2 -13  -4    7.78    3.11
  -2 -13   4   14.92    3.54
  -2  13   4   10.88    3.15
  -1 -13   4   29.49    4.62
   1 -13  -4   31.95    2.91
   1 -13  -4   28.74    3.93
  -1 -13   4   30.61    3.86
  -1  13   4   26.61    3.78
   0 -13  -4    5.44    2.07
   0 -13   4    6.97    3.83
   0 -13  -4    7.94    3.50
   0 -13   4    6.46    3.02
   1 -13   4   31.15    3.68
   1 -13   4   32.91    4.73
  -1 -13  -4   31.57    4.30
   1  13   4   38.16    4.52
   2 -13   4    3.78    2.82
   2 -13   4    5.98    3.80
  -2 -13  -4    8.93    3.88
   3 -13   4   12.52    2.90
  -3 -13  -4    2.15    3.84
   4 -13   4    7.86    2.69
  -4 -13  -4    1.26    4.02
  -5 -13  -4   -3.81    4.04
   5 -13   4   -3.26    2.30
  -6 -13  -4   13.19    4.77
  -7 -13  -4    2.77    4.59
  -8 -13  -4    4.30    4.80
  -9 -13  -4    2.02    5.09
 -10 -13  -4   -0.01    5.26
 -11 -13  -4   -0.97    5.45
 -14 -14   4   -2.46    5.52
 -13 -14   4   -5.42    5.27
 -12 -14   4   -1.41    5.25
 -11 -14   4   -3.97    4.90
 -10 -14   4    0.51    4.73
  -9 -14   4   -3.11    4.20
  -8 -14   4   -8.88    3.85
  -7 -14   4   -9.49    3.77
  -6 -14   4   -1.08    3.77
   5 -14  -4    6.15    2.05
  -5 -14   4   -2.68    3.63
  -4 -14   4   13.09    3.99
   4 -14  -4   13.87    2.75
   4 -14  -4   10.39    3.18
   3 -14  -4   25.05    3.26
  -3 -14   4   28.72    2.50
   3 -14  -4   27.72    3.44
  -3 -14   4   30.62    4.34
  -3 -14   4   26.33    4.59
  -2 -14   4    0.53    2.30
   2 -14  -4    4.01    3.10
  -2 -14   4    8.55    3.22
  -2 -14   4   -4.23    3.37
  -2  14   4    3.06    3.00
  -1 -14   4   -4.43    2.90
  -1 -14   4    0.21    3.66
   1 -14  -4    2.25    3.33
   0 -14  -4    7.16    3.58
   0 -14   4   -2.30    3.47
   0 -14   4   -4.34    2.88
   1 -14   4    1.04    3.60
   1 -14   4   -0.91    2.89
  -1 -14  -4   -2.75    3.45
   2 -14   4    3.68    3.74
   2 -14   4   -0.64    2.80
  -2 -14  -4   -1.90    3.65
   3 -14   4   10.69    3.89
  -3 -14  -4    0.87    3.95
   3 -14   4    2.54    2.82
  -4 -14  -4    6.53    4.32
  -5 -14  -4   -2.72    4.06
  -6 -14  -4    3.89    4.49
  -7 -14  -4    0.48    4.60
  -8 -14  -4    3.37    5.01
  -9 -14  -4    8.63    5.30
 -10 -14  -4    8.20    5.68
 -12 -15   4  -10.07    5.20
 -11 -15   4    1.13    5.37
 -10 -15   4   -8.09    4.67
  -9 -15   4   -4.17    4.52
  -8 -15   4   -4.97    4.32
  -7 -15   4   22.43    4.88
  -6 -15   4    2.30    4.09
  -5 -15   4   -7.23    3.72
  -4 -15   4   -3.57    3.61
   3 -15  -4   -1.16    2.86
  -3 -15   4    1.09    3.45
  -2 -15   4   10.30    3.55
  -2 -15   4    7.37    2.52
   2 -15  -4    7.38    3.32
  -2 -15   4    0.11    3.58
   1 -15  -4    5.03    3.51
  -1 -15   4   -0.43    3.64
  -1 -15   4   -1.13    3.13
  -1 -15   4    6.56    2.74
   0 -15   4   18.47    4.35
   0 -15  -4   16.91    4.07
   0 -15   4   14.23    3.49
   1 -15   4    6.84    3.89
  -1 -15  -4    9.77    3.97
   1 -15   4    0.32    3.11
   2 -15   4    1.33    3.04
   2 -15   4    4.67    3.82
  -2 -15  -4    1.77    3.85
   3 -15   4    2.79    3.90
  -3 -15  -4    2.50    4.13
   4 -15   4   11.18    4.02
  -4 -15  -4    9.06    4.47
  -5 -15  -4    4.56    4.37
  -6 -15  -4    8.40    4.90
  -7 -15  -4    2.52    4.81
  -8 -15  -4    0.74    4.96
  -9 -15  -4   -2.91    5.14
 -11 -16   4  -11.35    5.16
 -10 -16   4  -11.31    5.00
  -9 -16   4  -10.48    4.59
  -8 -16   4   -3.41    4.54
  -7 -16   4   -7.00    4.11
  -6 -16   4   -6.56    4.09
  -5 -16   4    7.20    4.28
  -4 -16   4   -1.22    3.80
  -3 -16   4   -0.12    3.69
   2 -16  -4    9.34    3.45
  -2 -16   4    6.85    3.70
  -1 -16   4   -7.47    3.27
   1 -16  -4    1.93    3.49
  -1 -16   4   -2.82    3.64
   0 -16   4   -0.99    3.87
   0 -16  -4    3.43    3.87
   0 -16   4   -9.35    3.19
  -1 -16  -4    6.36    4.10
   1 -16   4    2.31    3.87
  -2 -16  -4    5.02    4.18
   2 -16   4    5.80    3.88
   3 -16   4    3.63    3.88
  -3 -16  -4    4.43    4.22
  -4 -16  -4    3.40    4.44
  -5 -16  -4   -5.30    4.28
  -6 -16  -4    2.61    4.79
  -7 -16  -4    2.64    5.01
  -8 -17   4  -10.88    4.70
  -7 -17   4    1.33    4.86
  -6 -17   4   -3.01    4.37
  -5 -17   4   -8.93    4.06
  -4 -17   4    2.22    4.04
  -3 -17   4   -3.82    3.82
  -2 -17   4   -7.19    3.60
  -1 -17   4   -4.55    3.47
   0 -17  -4    4.51    3.95
   0 -17   4    4.94    3.92
  -1 -17  -4   15.42    4.53
  -2 -17  -4   -1.61    4.20
  -3 -17  -4   11.52    4.71
  -4 -17  -4    4.80    4.47
  -5 -17  -4    2.50    4.68
  -5 -18   4  -10.15    4.46
  -4 -18   4  -14.89    4.20
  -3 -18   4   -0.92    4.15
  -2 -18  -4    9.39    4.69
 -20   0   5   -2.22    4.78
 -19   0   5  -10.87    4.37
 -18   0   5   -4.47    4.18
 -17   0   5   -0.15    3.98
 -16   0   5    0.27    3.81
 -15   0   5   -2.20    3.47
 -14   0   5   -0.11    3.30
 -13   0   5   -0.69    2.95
 -12   0   5    2.01    2.73
 -11   0   5    0.93    2.55
 -10   0   5    3.93    2.59
  10   0  -5   -0.13    2.93
  -9   0   5   -0.76    2.56
   9   0  -5    0.76    2.85
   9   0  -5   -4.48    1.89
  -8   0   5    0.18    2.44
   8   0  -5   -1.38    1.82
   8   0  -5    1.05    2.74
   7   0  -5   -1.47    1.75
   7   0  -5   -2.19    2.50
  -7   0   5   -1.43    2.31
   6   0  -5   -2.42    2.51
  -6   0   5    3.90    2.32
   6   0  -5    0.05    1.29
   5   0  -5    0.59    1.68
  -5   0   5   -0.60    2.27
  -5   0   5   -0.19    1.76
   4   0  -5    1.35    1.44
  -4   0   5   -2.42    1.77
  -3   0   5    3.08    1.96
   2   0  -5   -0.54    0.64
  -2   0   5    0.70    2.10
   1   0  -5   -0.75    2.00
  -1   0   5    1.05    2.05
   0   0   5    4.05    2.16
   0   0   5   -1.53    2.08
   1   0   5   -0.33    2.08
   1   0   5   -1.31    2.08
  -2   0  -5    0.02    2.44
   2   0   5    0.34    2.19
  -3   0  -5   -4.71    2.63
   3   0   5   -0.56    2.28
   4   0   5   -0.88    2.41
  -4   0  -5   -2.95    2.70
   5   0   5    1.22    2.54
  -5   0  -5    0.04    3.04
  -6   0  -5    0.29    3.11
   6   0   5    1.99    2.54
   7   0   5   -2.40    2.67
  -7   0  -5   -4.35    3.07
  -8   0  -5   -3.56    3.39
  -9   0  -5   -0.07    3.69
 -10   0  -5   -0.05    3.96
 -11   0  -5   -5.68    4.17
 -12   0  -5    2.72    4.44
 -13   0  -5    0.79    4.55
 -14   0  -5   -0.58    4.74
 -15   0  -5   -2.19    5.05
 -16   0  -5   10.48    5.57
 -20  -1   5   -7.27    4.74
 -20   1   5   -1.59    4.46
 -19  -1   5   12.29    5.11
 -19   1   5    7.26    4.56
 -18  -1   5   -2.85    4.35
 -18   1   5   -0.71    4.06
 -17  -1   5   -0.75    4.05
 -17   1   5   -4.39    3.77
 -16  -1   5    2.01    3.87
 -16   1   5    1.74    3.71
 -15  -1   5   16.11    4.08
 -15   1   5   14.59    3.76
 -14  -1   5    9.75    3.66
 -14   1   5   13.90    3.52
 -13  -1   5    2.10    3.20
 -13   1   5    0.74    2.91
 -12  -1   5   47.86    4.27
 -12   1   5   52.32    4.77
 -11  -1   5    0.48    2.65
  11   1  -5   -0.27    2.16
 -11   1   5   -2.59    2.38
 -10  -1   5    7.69    2.81
  10  -1  -5   13.19    3.24
  10   1  -5    9.36    2.30
 -10   1   5    9.72    2.61
   9  -1  -5   66.30    5.18
  -9  -1   5   68.22    5.15
  -9   1   5   64.67    4.81
   9   1  -5   67.94    4.39
   9   1  -5   66.39    5.66
   8  -1  -5   18.41    2.45
  -8  -1   5   20.25    3.07
   8  -1  -5   15.53    3.07
   8   1  -5   24.63    3.47
  -8   1   5   16.66    2.84
   8   1  -5   21.00    2.42
  -7  -1   5   24.51    3.16
   7  -1  -5   25.82    3.12
  -7  -1   5   26.49    3.27
   7  -1  -5   26.73    2.49
  -7   1   5   27.09    2.96
   7   1  -5   22.61    3.39
  -6  -1   5  105.71    4.61
   6  -1  -5  114.21    5.58
  -6  -1   5  111.32    5.86
   6   1  -5  102.24    6.03
  -6   1   5  106.17    5.10
   5  -1  -5   -0.39    0.26
  -5  -1   5    0.09    1.76
  -5  -1   5   -1.64    2.39
  -5   1   5   -0.80    1.70
   5   1  -5    1.17    1.73
  -5   1   5   -0.01    2.13
  -4  -1   5    7.61    2.02
   4   1  -5    9.80    1.92
  -4   1   5    7.97    1.92
   3  -1  -5    2.64    1.92
  -3  -1   5   -1.29    1.91
   3   1  -5   -2.84    1.78
  -3   1   5    4.38    1.97
  -2  -1   5   -1.26    1.96
   2  -1  -5   -0.19    1.86
  -2   1   5   -0.68    1.88
   2   1  -5    0.44    1.79
   1  -1  -5   15.88    2.32
  -1  -1   5   13.13    2.35
  -1   1   5   12.89    2.30
  -1   1   5   15.62    2.27
   0  -1  -5   68.66    5.24
   0  -1  -5   67.56    4.35
   0  -1   5   69.89    4.31
   0   1   5   72.43    4.03
  -1  -1  -5   20.46    2.91
   1  -1   5   18.08    2.58
   1   1   5   15.52    2.43
   1   1   5   14.43    2.36
  -2  -1  -5  135.54    6.76
   2  -1   5  132.22    6.38
   2   1   5  129.61    6.39
  -3  -1  -5   25.93    3.48
   3  -1   5   32.80    3.09
  -3   1  -5   30.36    3.49
   3   1   5   26.38    3.11
   4  -1   5    3.35    2.49
  -4  -1  -5    1.30    2.86
  -4   1  -5    3.31    2.94
   4   1   5    0.68    2.47
   5  -1   5   44.03    3.73
  -5  -1  -5   50.68    4.49
  -5   1  -5   49.88    4.39
   5   1   5   46.54    3.93
  -6  -1  -5    7.15    3.28
   6  -1   5   12.03    2.82
   6   1   5    5.93    2.79
  -6   1  -5    8.00    3.29
   7  -1   5    1.32    2.61
  -7  -1  -5    0.26    3.17
  -7   1  -5    3.17    3.24
   7   1   5   -0.03    2.86
  -8  -1  -5   50.43    4.94
   8  -1   5   51.19    4.34
  -8   1  -5   50.09    4.93
  -9  -1  -5   28.92    4.46
  -9   1  -5   20.20    4.32
 -10  -1  -5   -1.20    4.00
 -10   1  -5    4.39    4.12
 -11  -1  -5   15.20    4.81
 -11   1  -5   16.90    4.72
 -12  -1  -5    2.57    4.56
 -12   1  -5    5.97    4.55
 -13  -1  -5   31.65    5.72
 -13   1  -5   35.67    5.74
 -14  -1  -5    3.84    5.00
 -14   1  -5    2.79    4.91
 -15  -1  -5   16.19    5.62
 -15   1  -5    5.66    5.09
 -16  -1  -5   13.09    5.85
 -16   1  -5   14.83    5.51
 -20  -2   5   -5.90    5.06
 -20   2   5   -0.75    4.29
 -19  -2   5   -3.73    4.70
 -19   2   5   -6.22    4.02
 -18  -2   5   -2.27    4.39
 -18   2   5   -0.94    3.96
 -17  -2   5   -6.40    4.07
 -17   2   5   -7.93    3.51
 -16  -2   5    4.33    4.03
 -16   2   5    9.92    3.70
 -15  -2   5   22.66    4.36
 -15   2   5   18.03    3.84
 -14  -2   5   -1.60    3.50
 -14   2   5    6.65    3.22
 -13  -2   5   10.87    3.59
 -13   2   5   13.71    3.12
 -12  -2   5   14.98    3.42
  12   2  -5   11.84    2.62
 -12   2   5   10.97    2.86
 -11  -2   5    7.87    3.00
  11  -2  -5   10.95    3.26
 -11   2   5    9.43    2.58
  11   2  -5   10.79    2.45
 -10  -2   5   26.03    3.46
  10  -2  -5   31.36    3.58
  10   2  -5   31.89    2.86
 -10   2   5   28.16    2.98
  -9  -2   5    1.24    2.78
   9  -2  -5    2.61    2.67
  -9   2   5    1.27    2.36
   9   2  -5    2.61    1.96
   8  -2  -5    3.28    2.02
   8  -2  -5    3.44    2.52
  -8  -2   5    2.51    2.71
  -8   2   5    3.36    2.30
   8   2  -5    5.95    3.11
   8   2  -5    3.47    1.96
   7  -2  -5    5.35    2.43
  -7  -2   5    9.30    2.89
  -7  -2   5    8.92    2.77
   7   2  -5    2.77    3.02
   7   2  -5   -0.68    1.24
   6  -2  -5   67.98    4.41
  -6  -2   5   71.68    5.07
  -6  -2   5   72.83    3.77
  -6  -2   5   71.46    5.42
  -6   2   5   71.27    4.16
   6   2  -5   81.54    4.00
   6   2  -5   74.51    5.73
  -5  -2   5   44.31    3.80
   5  -2  -5   43.11    3.39
  -5  -2   5   44.98    3.22
  -5   2   5   39.22    3.36
   5   2  -5   44.79    3.26
   4  -2  -5    2.59    1.89
  -4  -2   5   -4.13    2.59
  -4  -2   5    1.95    1.87
   4   2  -5   -0.70    1.72
  -4   2   5    5.12    1.89
   3  -2  -5    0.10    1.85
  -3  -2   5   -1.04    1.88
   3   2  -5   -1.14    1.85
  -3   2   5   -1.87    1.83
   2  -2  -5   16.82    2.20
  -2  -2   5   17.29    2.29
   2   2  -5   16.50    2.28
  -2   2   5   19.29    2.22
  -2   2   5   17.13    2.51
  -1  -2   5   88.04    4.52
   1  -2  -5   87.06    4.33
  -1   2   5   94.79    5.13
  -1   2   5   99.58    4.37
   0  -2  -5   10.15    2.16
   0  -2  -5    6.37    2.46
   0  -2   5    6.51    2.21
   0   2   5    7.20    2.07
   0   2   5    0.70    1.64
   1  -2   5   33.10    2.93
  -1  -2  -5   32.41    3.20
   1   2   5   27.48    2.69
   2  -2   5   97.61    5.33
  -2  -2  -5   95.97    5.96
   2   2   5   96.70    4.83
   3  -2   5   46.89    3.50
  -3  -2  -5   36.98    3.83
   3   2   5   43.38    3.62
  -4  -2  -5    0.28    2.87
   4  -2   5    2.50    2.40
  -4   2  -5   -1.37    2.86
   4   2   5   -0.64    2.50
   5  -2   5   96.65    6.02
  -5  -2  -5  100.98    6.57
  -5   2  -5  107.10    6.47
   5   2   5   96.79    6.23
  -6  -2  -5    5.32    3.17
   6  -2   5    4.08    2.52
   6   2   5   -1.56    2.69
  -6   2  -5    3.92    3.14
  -7  -2  -5    5.60    3.45
   7  -2   5    1.72    2.52
  -7   2  -5    9.35    3.47
   8  -2   5    2.93    2.88
  -8  -2  -5    8.12    3.71
  -8   2  -5   11.83    3.80
   9  -2   5    1.73    3.12
  -9  -2  -5    5.86    3.94
  -9   2  -5    5.51    3.86
 -10  -2  -5   13.92    4.53
 -10   2  -5    9.58    4.22
 -11  -2  -5   -5.95    4.20
 -11   2  -5    6.41    4.30
 -12  -2  -5    6.58    4.72
 -12   2  -5    8.93    4.60
 -13  -2  -5    9.38    4.90
 -13   2  -5   11.88    4.76
 -14  -2  -5    4.60    5.03
 -14   2  -5    8.02    4.85
 -15  -2  -5   13.26    5.65
 -15   2  -5   26.61    5.73
 -16  -2  -5   -0.53    5.61
 -16   2  -5    8.57    5.35
 -20  -3   5   -3.17    5.28
 -19  -3   5   28.04    5.67
 -19   3   5   27.19    4.68
 -18  -3   5    0.77    4.54
 -18   3   5   -9.07    3.66
 -17  -3   5   11.11    4.75
 -17   3   5    5.63    3.78
 -16  -3   5    3.23    4.11
 -16   3   5   -1.85    3.29
 -15  -3   5    4.12    3.90
 -15   3   5   -3.98    3.11
 -14  -3   5    2.82    3.81
 -14   3   5   -2.85    2.95
 -13  -3   5   -5.27    3.30
 -13   3   5    2.57    2.64
  13   3  -5   -0.99    2.44
 -12  -3   5   -1.57    3.10
  12   3  -5    3.34    2.28
 -12   3   5    5.31    2.49
 -11  -3   5   24.89    3.74
  11  -3  -5   32.80    3.84
 -11   3   5   30.32    2.97
  11   3  -5   28.30    2.93
 -10  -3   5    2.46    2.80
  10  -3  -5    1.93    2.68
  10   3  -5    3.49    2.09
 -10   3   5    0.71    2.11
  -9  -3   5  105.18    6.46
   9  -3  -5  104.79    5.61
   9   3  -5  103.71    4.80
  -9   3   5   98.66    5.16
  -8  -3   5   20.49    3.30
   8  -3  -5   20.72    2.82
  -8   3   5   21.10    2.51
   8   3  -5   19.17    3.62
  -7  -3   5   29.67    3.57
   7  -3  -5   32.45    2.86
   7  -3  -5   36.16    3.07
  -7  -3   5   31.42    3.69
   7   3  -5   39.71    4.30
  -6  -3   5    6.14    2.88
  -6  -3   5    7.68    2.80
   6  -3  -5    5.25    2.07
  -6  -3   5    8.57    1.89
   6   3  -5    8.15    3.13
   6   3  -5    5.83    1.81
  -5  -3   5    3.16    1.67
  -5  -3   5    1.31    2.71
   5  -3  -5   -1.64    1.82
  -5   3   5    1.04    1.57
   5   3  -5   -0.85    1.61
   4  -3  -5   16.26    2.20
  -4  -3   5   17.97    3.22
  -4  -3   5   16.94    2.10
  -4   3   5   16.55    2.13
   4   3  -5   20.56    2.15
   3  -3  -5    3.63    1.97
  -3  -3   5    4.46    1.87
  -3   3   5    0.46    1.78
   3   3  -5    3.33    1.90
  -3   3   5    5.25    2.09
  -2  -3   5   41.90    2.83
   2  -3  -5   45.12    3.56
  -2   3   5   36.52    2.94
  -2   3   5   37.74    2.69
   2   3  -5   41.16    2.78
   1  -3  -5   57.43    3.55
  -1  -3   5   50.75    3.98
   1  -3  -5   56.31    4.40
  -1   3   5   63.85    4.51
  -1   3   5   57.82    3.82
   0  -3  -5    2.10    1.89
   0  -3  -5    0.99    2.30
   0   3   5    2.61    1.96
   0   3   5    0.49    1.60
  -1  -3  -5  203.91    8.21
   1   3   5  188.36    6.67
   2  -3   5   31.29    2.92
  -2  -3  -5   38.19    3.58
   2   3   5   27.27    2.74
   3  -3   5   -0.24    2.15
  -3  -3  -5   -1.47    2.69
   3   3   5   -1.06    0.38
   3   3   5   -0.79    2.20
  -4  -3  -5    9.94    3.14
   4  -3   5   11.35    2.65
   4   3   5    8.63    2.82
   5  -3   5   42.15    3.54
  -5  -3  -5   36.67    4.11
   5   3   5   41.75    3.97
   6  -3   5   12.95    2.60
  -6  -3  -5   16.37    3.69
   6   3   5   10.14    3.14
  -6   3  -5   12.63    3.35
   7  -3   5    1.76    2.54
  -7  -3  -5    0.00    3.42
  -7   3  -5    2.29    3.27
  -8  -3  -5    3.65    3.70
   8  -3   5    5.34    2.89
  -8   3  -5    2.94    3.36
  -9  -3  -5   55.12    5.69
   9  -3   5   58.26    4.57
  -9   3  -5   54.78    5.17
 -10  -3  -5    7.62    4.48
 -10   3  -5    2.61    4.02
 -11  -3  -5   31.30    5.46
 -11   3  -5   33.91    5.13
 -12  -3  -5    4.65    4.79
 -12   3  -5   12.38    4.67
 -13  -3  -5   26.68    5.73
 -13   3  -5   28.75    5.25
 -14  -3  -5    9.75    5.28
 -14   3  -5   18.82    5.00
 -15  -3  -5   10.01    5.52
 -15   3  -5    3.36    4.90
 -16  -3  -5   14.52    5.88
 -16   3  -5   14.25    5.15
 -20  -4   5   -7.11    5.29
 -19  -4   5   -3.09    4.98
 -18  -4   5    0.39    4.71
 -18   4   5   -2.52    3.49
 -17  -4   5   -4.88    4.36
 -17   4   5   -1.22    3.33
 -16  -4   5   14.40    4.69
 -16   4   5   11.45    3.47
 -15  -4   5    4.66    4.02
 -15   4   5    6.67    3.17
 -14  -4   5    9.44    4.06
 -14   4   5    6.91    2.96
 -13  -4   5    1.12    3.53
  13   4  -5   -1.21    2.44
 -13   4   5    1.07    2.55
  12  -4  -5    1.39    3.21
 -12  -4   5    3.91    3.41
 -12   4   5    0.20    2.32
  12   4  -5    4.58    2.36
  11  -4  -5   13.70    3.29
 -11  -4   5   14.50    3.46
 -11   4   5   16.61    2.43
  11   4  -5   14.74    2.48
 -10  -4   5    0.01    2.79
  10  -4  -5   -3.03    2.42
  10   4  -5   -2.28    1.80
 -10   4   5    0.39    1.88
  -9  -4   5    7.15    3.05
   9  -4  -5    3.08    2.40
  -9   4   5    2.29    1.97
   9   4  -5    6.07    1.97
  -8  -4   5    3.09    2.84
   8  -4  -5    1.62    2.21
  -8   4   5    2.89    1.98
   8   4  -5    0.28    1.25
   7  -4  -5   99.60    4.71
   7  -4  -5   86.72    4.91
  -7  -4   5  104.32    6.44
  -7  -4   5  101.57    4.29
  -7  -4   5   92.32    6.38
   7   4  -5   95.76    4.39
   7   4  -5   92.08    6.23
  -6  -4   5   16.73    3.13
   6  -4  -5   12.79    2.38
  -6  -4   5   19.49    2.13
  -6  -4   5   12.69    3.21
   6   4  -5   15.24    2.03
   5  -4  -5    3.20    1.99
  -5  -4   5    5.02    1.79
  -5  -4   5    4.86    2.75
  -5  -4   5    6.06    2.95
   5   4  -5    3.11    1.75
   4  -4  -5    3.77    1.92
  -4  -4   5    5.67    1.80
  -4  -4   5    0.21    2.80
   4   4  -5    3.17    1.79
  -4   4   5    2.92    1.95
   3  -4  -5    3.00    1.91
  -3  -4   5    7.98    1.92
  -3   4   5    1.55    1.93
   3   4  -5    3.00    1.88
  -3   4   5    3.85    1.81
   2  -4  -5    6.67    1.92
  -2  -4   5    8.68    2.08
   2  -4  -5    8.92    2.23
  -2   4   5    9.31    2.13
  -2   4   5    5.75    1.79
  -1  -4   5    0.20    2.10
   1  -4  -5    2.26    2.26
   1  -4  -5    2.83    1.84
  -1   4   5   -2.25    1.68
  -1   4   5   -2.20    1.99
   0  -4  -5   58.54    4.88
   0  -4  -5   55.23    3.84
   0   4   5   58.11    3.65
  -1  -4  -5   -0.62    1.89
  -1  -4  -5    3.69    2.55
   1   4   5    1.78    1.91
   1   4   5    0.07    2.19
  -2  -4  -5   65.11    5.45
   2   4   5   69.71    4.03
   2   4   5   67.30    5.28
  -3  -4  -5   58.11    5.34
   3  -4   5   47.30    4.35
   3   4   5   43.74    3.73
   3   4   5   42.75    3.20
   4  -4   5    3.95    2.33
  -4  -4  -5    0.57    3.00
   4   4   5    1.03    2.32
  -5  -4  -5    7.70    3.21
   5  -4   5    8.86    2.48
   5   4   5    5.38    2.70
   6  -4   5    5.98    2.51
  -6  -4  -5   -0.07    3.29
   7  -4   5   20.97    3.00
  -7  -4  -5   19.40    4.04
  -8  -4  -5    1.35    3.76
   8  -4   5    1.18    2.61
   9  -4   5   -1.74    2.88
  -9  -4  -5    5.15    4.13
  -9   4  -5    3.85    3.74
  10  -4   5    0.12    3.04
 -10  -4  -5   -3.32    4.24
 -10   4  -5    3.82    3.88
 -11  -4  -5   -5.87    4.37
 -11   4  -5    1.16    3.95
 -12  -4  -5    4.48    4.84
 -12   4  -5    5.96    4.10
 -13  -4  -5    1.52    5.02
 -13   4  -5    4.65    4.37
 -14  -4  -5    2.01    5.30
 -14   4  -5   11.00    4.67
 -15  -4  -5   -1.29    5.32
 -15   4  -5    4.72    4.48
 -16  -4  -5    6.64    5.87
 -20  -5   5   -2.06    5.59
 -19  -5   5  -14.24    4.77
 -18  -5   5   -4.44    4.79
 -17  -5   5   -3.29    4.65
 -17   5   5    0.66    3.13
 -16  -5   5   13.16    4.73
 -16   5   5   22.67    3.47
 -15  -5   5    4.49    4.14
 -15   5   5   -0.12    2.86
 -14  -5   5   13.22    4.40
 -14   5   5   17.60    3.04
  14   5  -5   21.54    3.14
 -13  -5   5    3.19    3.81
  13   5  -5   -1.89    2.39
 -13   5   5    2.65    2.42
 -12  -5   5   26.00    4.18
 -12   5   5   22.80    2.67
  12   5  -5   28.88    2.99
  11  -5  -5    9.20    3.06
 -11  -5   5   13.45    3.69
 -11   5   5   13.36    2.21
  11   5  -5   16.20    2.44
 -10  -5   5   18.82    3.58
  10  -5  -5   14.64    2.76
 -10   5   5   11.78    1.99
  10   5  -5   14.43    2.29
  -9  -5   5   15.79    3.33
   9  -5  -5   14.87    2.64
  -9   5   5   18.96    2.02
  -8  -5   5   10.04    3.22
   8  -5  -5   10.57    2.20
  -8   5   5   10.66    1.90
   8   5  -5    6.11    1.68
  -7  -5   5   40.03    4.11
  -7  -5   5   47.56    3.25
  -7  -5   5   37.65    4.23
   7   5  -5   46.35    3.57
  -6  -5   5    5.88    1.79
  -6  -5   5    1.34    2.97
   6  -5  -5    5.40    2.24
  -6  -5   5    4.22    2.78
   6   5  -5    9.07    1.84
  -6   5   5    0.56    1.81
   6   5  -5    4.61    3.05
  -5  -5   5    4.96    2.77
  -5  -5   5    3.05    2.96
  -5  -5   5    4.03    1.74
   5  -5  -5    3.95    2.15
  -5   5   5    2.80    1.92
   5   5  -5    0.74    1.78
   4  -5  -5   39.29    2.90
  -4  -5   5   43.09    3.91
  -4  -5   5   40.62    4.36
  -4  -5   5   45.01    3.21
   4   5  -5   38.86    2.79
  -4   5   5   44.22    3.85
   3  -5  -5   -1.62    1.91
  -3  -5   5    2.53    1.71
   3  -5  -5    0.95    1.84
  -3   5   5   -0.34    1.98
   2  -5  -5   27.23    2.86
   2  -5  -5   32.16    2.58
  -2  -5   5   31.39    2.64
  -2   5   5   27.36    2.73
  -2   5   5   29.50    2.40
   1  -5  -5    1.89    1.81
  -1  -5   5   -0.67    1.97
   1  -5  -5   -0.23    2.27
  -1   5   5   -3.43    1.58
  -1   5   5    2.46    1.41
   0  -5  -5  106.69    4.68
   0  -5  -5  102.40    5.92
   0   5   5   98.79    5.75
   0   5   5   99.07    4.49
  -1  -5  -5  189.97    6.75
  -1  -5  -5  201.63    8.62
   1   5   5  196.20    6.76
   1   5   5  206.48    8.48
  -2  -5  -5   34.34    3.81
   2   5   5   35.71    3.56
   2   5   5   32.38    2.63
  -3  -5  -5   -0.28    2.82
   3  -5   5    1.65    2.18
   3   5   5    0.98    2.03
   3   5   5    2.70    2.71
  -4  -5  -5    3.55    3.12
   4  -5   5    4.02    2.22
   4   5   5    6.48    2.81
   4   5   5    3.62    2.27
   5  -5   5    1.92    2.21
  -5  -5  -5    4.56    3.30
   5   5   5    4.76    2.44
   6  -5   5   63.37    4.84
  -6  -5  -5   55.83    5.06
  -7  -5  -5    2.34    3.76
   7  -5   5    5.62    2.54
  -8  -5  -5   35.63    5.11
   8  -5   5   41.27    3.66
  -9  -5  -5   19.54    4.90
   9  -5   5   25.00    3.46
  10  -5   5   -0.73    3.06
 -10  -5  -5   -0.41    4.55
 -11  -5  -5    3.44    4.73
 -12  -5  -5   -0.94    4.80
 -13  -5  -5   13.67    5.51
 -14  -5  -5   10.74    5.78
 -15  -5  -5   15.74    6.19
 -16  -5  -5   10.93    6.14
 -19  -6   5   -7.19    5.27
 -18  -6   5   -6.68    4.80
 -17  -6   5   -5.62    4.74
 -16  -6   5   -5.43    4.39
 -16   6   5    0.40    2.66
 -15  -6   5   -0.34    4.22
 -15   6   5    0.65    2.47
 -14  -6   5    1.46    4.14
  14   6  -5    3.25    2.51
 -14   6   5    5.48    2.40
 -13  -6   5    7.58    4.07
  13   6  -5    5.75    2.48
 -13   6   5    1.68    2.21
 -12  -6   5    4.76    3.74
  12   6  -5   -0.88    2.26
 -12   6   5    0.75    1.90
  11  -6  -5   -0.70    2.68
 -11  -6   5    3.49    3.51
 -11   6   5    0.80    1.70
  11   6  -5   -0.17    2.10
 -10  -6   5    7.06    3.44
  10  -6  -5    4.38    2.39
  10   6  -5    3.44    1.97
   9  -6  -5   -1.77    1.97
  -9  -6   5    0.26    2.89
  -9   6   5    2.03    1.39
   9   6  -5    2.04    1.26
   8  -6  -5   -0.20    1.79
  -8  -6   5   -0.77    2.90
   8   6  -5   -0.75    1.70
  -7  -6   5    0.21    2.85
  -7  -6   5    0.48    1.63
  -7  -6   5   -4.74    2.97
  -7   6   5    1.28    1.57
   7   6  -5   -0.38    1.61
  -6  -6   5   93.45    3.93
  -6  -6   5   87.30    6.45
  -6  -6   5   89.34    5.90
   6  -6  -5   85.81    4.78
  -6   6   5   82.36    4.20
   6   6  -5   85.38    4.12
  -5  -6   5   30.91    3.80
   5  -6  -5   34.67    3.03
  -5  -6   5   35.39    4.29
  -5  -6   5   38.42    2.88
   5   6  -5   36.86    2.68
  -5   6   5   32.53    2.57
  -4  -6   5   16.22    3.20
  -4  -6   5   14.79    3.66
   4  -6  -5   15.58    2.42
  -4  -6   5   12.04    1.94
  -4   6   5   10.76    2.12
  -3  -6   5   79.61    6.24
   3  -6  -5   90.70    4.94
   3  -6  -5   96.89    4.71
  -3  -6   5   93.63    4.25
  -3   6   5   97.94    4.91
  -2  -6   5    2.95    1.96
   2  -6  -5    6.38    2.03
   2  -6  -5    3.08    2.31
  -2   6   5    1.69    1.96
   1  -6  -5   78.83    4.13
   1  -6  -5   77.10    5.24
  -1   6   5   75.04    3.91
   0  -6  -5   87.22    4.24
   0  -6  -5   86.39    5.77
   0   6   5   82.93    3.99
   0   6   5   82.91    5.62
  -1  -6  -5    5.64    2.01
  -1  -6  -5    6.80    2.96
   1   6   5    0.41    1.82
   1   6   5    9.99    2.73
  -2  -6  -5   -1.00    2.78
   2   6   5    0.82    2.66
   2   6   5   -0.28    1.82
  -3  -6  -5    4.32    3.07
   3   6   5    5.85    2.83
   3   6   5    3.52    1.92
   4  -6   5    0.90    2.05
  -4  -6  -5   -1.74    2.94
   4   6   5    0.92    2.77
   4   6   5    1.06    2.04
  -5  -6  -5    8.23    3.52
   5  -6   5    5.22    2.24
   5   6   5    3.89    2.29
  -6  -6  -5   -1.90    3.37
   6  -6   5   -1.11    2.22
   6   6   5    1.67    2.38
  -7  -6  -5   36.94    4.76
   7  -6   5   37.53    3.34
   7   6   5   36.46    3.44
   8  -6   5   33.55    3.42
  -8  -6  -5   29.88    4.85
   9  -6   5   -1.22    2.73
  -9  -6  -5   -0.86    4.29
  10  -6   5    7.16    3.11
 -10  -6  -5    2.97    4.58
 -11  -6  -5    2.75    4.82
  11  -6   5   -1.66    3.06
 -12  -6  -5   10.06    5.25
 -13  -6  -5    1.18    5.36
 -14  -6  -5   -0.53    5.48
 -15  -6  -5   14.07    6.15
 -19  -7   5   -3.65    5.53
 -18  -7   5   -4.89    5.10
 -17  -7   5   -8.75    4.73
 -16  -7   5   -5.56    4.53
 -15  -7   5    0.71    4.39
 -14  -7   5   19.18    4.87
  14   7  -5   20.14    3.08
 -13  -7   5   -3.84    3.85
  13   7  -5    2.29    2.42
 -12  -7   5    5.69    4.00
  12  -7  -5    3.86    3.04
  12   7  -5    5.30    2.38
 -11  -7   5   18.02    4.07
  11  -7  -5   14.00    2.86
  11   7  -5   18.77    2.50
 -10  -7   5   12.56    3.73
  10  -7  -5   18.39    2.56
   9  -7  -5   12.06    2.06
  -9  -7   5    7.49    3.39
   9   7  -5   13.08    2.06
  -8  -7   5   15.40    3.51
   8   7  -5   13.62    1.94
  -7  -7   5   12.25    3.27
  -7  -7   5   15.07    1.90
  -7  -7   5   13.51    3.74
   7   7  -5   14.95    2.01
   6  -7  -5   87.24    5.09
  -6  -7   5   92.93    3.88
  -6  -7   5   91.94    6.59
  -6  -7   5   94.96    6.62
   6   7  -5   86.29    4.24
  -6   7   5   83.12    4.04
  -5  -7   5    1.23    3.23
  -5  -7   5    1.64    1.58
   5  -7  -5    3.46    2.21
  -5  -7   5    4.17    2.78
  -5   7   5    0.71    1.68
  -4  -7   5   27.25    4.01
  -4  -7   5   20.96    3.48
  -4  -7   5   18.47    2.07
   4  -7  -5   22.99    2.68
  -4   7   5   19.52    2.26
  -3  -7   5   23.47    3.48
   3  -7  -5   24.78    2.63
   3  -7  -5   25.28    2.80
  -3  -7   5   20.64    3.90
  -3  -7   5   25.78    2.37
  -3   7   5   24.13    2.52
   2  -7  -5    1.44    1.93
   2  -7  -5    3.72    2.38
  -2  -7   5   -1.72    1.85
  -2   7   5   -0.73    1.31
   1  -7  -5   16.47    2.22
   1  -7  -5   16.23    2.91
  -1   7   5   17.23    2.72
   0  -7  -5   -0.66    1.76
   0  -7  -5    2.53    2.67
   0   7   5    0.69    1.67
   0   7   5   -0.60    2.33
  -1  -7  -5  195.24    6.67
  -1  -7  -5  204.26    8.76
   1   7   5  195.74    8.46
   1   7   5  186.97    6.30
  -2  -7  -5    1.50    2.92
   2   7   5    1.79    1.74
   2   7   5    0.50    2.61
  -3  -7  -5   61.75    5.71
   3   7   5   51.91    4.42
   3   7   5   62.40    3.61
   4  -7   5   -2.65    1.87
  -4  -7  -5   -3.07    3.06
   4   7   5    1.14    1.93
  -5  -7  -5   32.27    4.27
   5  -7   5   40.33    3.15
   5   7   5   29.47    2.75
  -6  -7  -5   34.38    4.67
   6  -7   5   45.11    3.36
   6   7   5   36.71    3.12
  -7  -7  -5   -1.87    3.82
   7  -7   5    4.48    2.52
   7   7   5   -1.38    2.44
   8  -7   5   51.34    3.79
  -8  -7  -5   45.16    5.59
   8   7   5   48.55    3.87
   9  -7   5   19.64    3.20
  -9  -7  -5   18.29    4.94
   9   7   5   18.90    3.24
  10  -7   5   -4.16    2.81
 -10  -7  -5    3.84    4.65
 -11  -7  -5   -0.30    4.76
 -12  -7  -5    9.88    5.50
 -13  -7  -5   10.12    5.73
 -14  -7  -5    3.78    5.72
 -15  -7  -5    0.03    5.79
 -19  -8   5   -5.86    5.63
 -18  -8   5   -6.27    5.15
 -17  -8   5    4.85    5.38
 -16  -8   5   -7.84    4.62
 -15  -8   5    4.43    4.76
 -14  -8   5   -1.18    4.18
 -13  -8   5   18.59    4.70
  13   8  -5   20.98    2.77
 -12  -8   5   -0.80    3.90
  12  -8  -5   -5.53    2.61
  12   8  -5   -4.29    1.98
  11  -8  -5    0.26    2.41
 -11  -8   5    3.56    3.75
  11   8  -5   -1.13    1.22
 -10  -8   5    6.47    3.73
  10   8  -5    3.49    1.87
  -9  -8   5   11.53    3.61
   9   8  -5    8.77    1.88
  -8  -8   5   19.63    3.74
   8   8  -5   23.04    2.23
  -7  -8   5   17.00    1.86
  -7  -8   5   12.88    3.53
  -7  -8   5   14.21    3.89
   7   8  -5   11.58    1.96
  -6  -8   5   13.84    3.35
  -6  -8   5    7.32    3.63
   6  -8  -5   12.87    2.58
  -6  -8   5   12.54    1.70
  -6   8   5    9.93    1.64
  -5  -8   5   19.95    1.98
  -5  -8   5   20.16    3.95
   5  -8  -5   21.99    2.84
  -5  -8   5   19.95    3.57
  -5   8   5   20.55    2.12
   4  -8  -5    9.09    2.11
  -4  -8   5   13.09    3.59
  -4  -8   5   15.28    3.16
   4  -8  -5    8.67    2.35
  -4  -8   5    9.29    1.87
  -4   8   5   13.43    2.06
  -3  -8   5   93.99    4.46
   3  -8  -5  109.49    5.14
  -3  -8   5  111.17    6.85
   3  -8  -5  105.63    5.41
  -3  -8   5  103.44    6.54
   2  -8  -5    5.28    2.43
  -2  -8   5    2.84    2.70
  -2  -8   5   -0.50    3.23
   2  -8  -5    4.31    2.08
  -2  -8   5    7.57    2.05
  -2   8   5    1.29    2.11
  -2   8   5    2.02    1.71
   1  -8  -5   27.46    3.22
   1  -8  -5   24.99    2.47
  -1  -8   5   24.31    3.22
  -1   8   5   27.65    2.99
   0  -8  -5   16.78    2.17
   0  -8  -5   17.29    3.21
   0   8   5   15.16    2.84
  -1  -8  -5    1.86    2.91
  -1  -8  -5    4.37    1.87
   1   8   5   -0.90    2.65
   1   8   5    5.92    1.66
  -2  -8  -5    8.79    3.24
   2   8   5    4.81    1.65
   2   8   5    4.02    2.86
  -3  -8  -5    1.73    3.15
   3   8   5    1.49    1.71
  -4  -8  -5   20.74    3.98
   4  -8   5   20.35    2.61
   4   8   5   19.63    2.19
   5  -8   5    3.39    2.18
  -5  -8  -5    3.69    3.52
   5   8   5    1.01    1.96
   6  -8   5    0.08    2.25
  -6  -8  -5    1.79    3.77
   6   8   5    0.80    2.08
   7  -8   5   14.22    2.77
  -7  -8  -5    5.64    4.14
   7   8   5   16.40    2.63
   8  -8   5   28.67    3.13
  -8  -8  -5   21.14    4.93
   8   8   5   27.40    3.13
   9  -8   5   -2.21    2.54
  -9  -8  -5    3.01    4.51
   9   8   5   -2.70    2.57
 -10  -8  -5    1.96    4.71
  10   8   5    1.88    2.81
 -11  -8  -5   14.81    5.47
  11   8   5    8.36    3.15
 -12  -8  -5    6.62    5.48
  12   8   5   15.83    3.35
 -13  -8  -5    4.74    5.67
 -14  -8  -5    3.25    5.86
 -18  -9   5   -8.07    5.31
 -17  -9   5   -1.51    5.39
 -16  -9   5   -8.70    4.74
 -15  -9   5   11.03    5.02
 -14  -9   5   -3.58    4.30
 -13  -9   5   -5.26    4.11
 -12  -9   5   -2.06    3.94
  12   9  -5   -0.05    1.21
 -11  -9   5    3.62    3.96
  11   9  -5    0.87    1.79
 -10  -9   5   11.13    4.01
  10   9  -5   14.38    2.06
  -9  -9   5   58.27    5.49
   9   9  -5   58.61    3.60
  -8  -9   5   14.78    3.86
  -7  -9   5   19.25    4.35
  -7  -9   5   15.68    3.71
  -7  -9   5   20.28    1.88
  -6  -9   5    5.66    1.54
  -6  -9   5    3.73    3.15
  -6  -9   5    2.89    3.53
   6  -9  -5    5.83    2.57
   5  -9  -5   40.23    3.40
  -5  -9   5   33.31    2.38
  -5  -9   5   37.29    4.18
  -5  -9   5   39.92    4.76
  -5   9   5   38.63    2.64
  -4  -9   5   41.66    4.77
  -4  -9   5   34.40    2.54
   4  -9  -5   33.29    2.91
   4  -9  -5   35.77    3.13
  -4  -9   5   44.00    4.22
  -4   9   5   32.68    2.72
   3  -9  -5   -0.89    2.24
  -3  -9   5    1.83    1.94
  -3  -9   5    6.66    2.89
   3  -9  -5    1.55    2.19
  -3  -9   5   -0.70    3.18
  -3   9   5   -1.01    1.34
  -2  -9   5   37.77    2.97
   2  -9  -5   32.24    3.30
  -2  -9   5   44.35    3.91
   2  -9  -5   35.51    2.94
  -2  -9   5   29.67    4.33
  -2   9   5   33.00    3.10
  -2   9   5   32.33    2.61
   1  -9  -5   81.81    5.74
  -1  -9   5   65.65    5.17
   1  -9  -5   77.80    4.33
  -1   9   5   72.11    5.44
  -1   9   5   80.29    4.37
   0  -9  -5    3.08    2.79
   0  -9  -5    2.76    1.88
   0  -9   5   10.39    2.70
   0   9   5    2.56    2.55
  -1  -9  -5   36.08    4.02
  -1  -9  -5   33.12    2.54
   1   9   5   26.89    3.50
  -2  -9  -5   11.23    3.42
   2   9   5   11.98    3.16
   2   9   5   10.16    1.69
  -3  -9  -5   58.51    5.13
   3   9   5   58.47    3.23
  -4  -9  -5    2.68    3.48
   4   9   5    5.15    1.73
   5  -9   5    9.00    2.35
  -5  -9  -5    9.76    3.97
   5   9   5    5.93    1.82
  -6  -9  -5   16.32    4.39
   6  -9   5   18.27    2.71
   6   9   5   21.49    2.30
   7  -9   5    9.61    2.54
  -7  -9  -5    8.22    4.39
   7   9   5    8.53    2.25
   8  -9   5   22.24    2.86
  -8  -9  -5   21.92    4.97
   8   9   5   15.09    2.48
  -9  -9  -5    1.56    4.54
   9   9   5    3.60    2.43
 -10  -9  -5   -5.45    4.54
  10   9   5   -1.81    2.50
 -11  -9  -5    3.00    5.10
 -12  -9  -5    1.11    5.35
 -13  -9  -5   10.80    5.85
 -14  -9  -5   -3.43    5.90
 -17 -10   5  -14.98    5.14
 -16 -10   5   -3.02    5.17
 -15 -10   5   -5.66    4.75
 -14 -10   5    5.30    4.87
 -13 -10   5   -7.65    4.19
 -12 -10   5    2.28    4.19
 -11 -10   5   -1.47    3.91
 -10 -10   5   52.98    5.63
  -9 -10   5    0.14    3.75
  -8 -10   5   23.57    4.40
  -7 -10   5   25.29    4.18
  -6 -10   5   43.00    4.67
   6 -10  -5   45.92    3.85
  -6 -10   5   45.21    5.15
  -6 -10   5   45.51    2.83
  -5 -10   5    1.85    1.69
  -5 -10   5    3.79    3.27
   5 -10  -5    3.59    2.62
  -5 -10   5    7.32    3.84
  -5  10   5    4.15    1.90
   4 -10  -5   13.39    2.74
   4 -10  -5   19.24    2.68
  -4 -10   5   19.47    2.17
  -4 -10   5   21.02    4.20
  -4 -10   5   21.68    3.74
   3 -10  -5   22.40    2.85
   3 -10  -5   19.61    2.86
  -3 -10   5   22.70    4.13
  -3 -10   5   19.20    2.48
  -3 -10   5   19.92    3.53
  -3  10   5   19.65    2.68
   2 -10  -5    2.03    2.55
   2 -10  -5   -2.77    2.15
  -2 -10   5    2.88    3.43
  -2 -10   5    2.79    2.71
  -2 -10   5    4.73    2.24
  -2  10   5    3.00    2.13
  -2  10   5   -1.15    2.41
  -1 -10   5   29.33    3.45
  -1 -10   5   30.46    4.40
   1 -10  -5   27.83    3.64
   1 -10  -5   23.83    2.62
  -1  10   5   29.15    2.95
  -1  10   5   23.17    3.28
   0 -10  -5    4.99    2.00
   0 -10   5    4.50    2.68
   0 -10  -5    6.42    3.12
   0  10   5   -3.58    1.57
   0  10   5    5.64    2.86
  -1 -10  -5   -0.27    3.10
  -1 -10  -5    0.69    1.87
   1 -10   5   -0.49    2.61
   1  10   5   -3.75    2.85
  -2 -10  -5   30.41    4.21
  -3 -10  -5    1.71    3.47
  -4 -10  -5    5.71    3.88
   4  10   5    4.98    1.47
  -5 -10  -5    6.01    4.06
   5 -10   5   16.33    2.57
   5  10   5   16.98    1.79
   6 -10   5    5.68    2.29
  -6 -10  -5   10.70    4.38
   6  10   5    5.95    1.71
  -7 -10  -5   11.84    4.56
   7 -10   5   18.84    2.66
   7  10   5   17.28    2.05
  -8 -10  -5   12.35    4.85
   8  10   5   18.45    2.22
  -9 -10  -5   -0.85    4.60
 -10 -10  -5   19.58    5.52
 -11 -10  -5   -2.11    5.14
 -12 -10  -5   12.37    5.88
 -13 -10  -5   -0.73    5.76
 -17 -11   5  -11.31    5.33
 -16 -11   5   -3.82    5.31
 -15 -11   5   -3.15    5.02
 -14 -11   5    4.57    5.11
 -13 -11   5    6.86    4.84
 -12 -11   5    7.46    4.73
 -11 -11   5    4.58    4.34
 -10 -11   5    6.06    4.27
  -9 -11   5   11.87    4.17
  -8 -11   5    5.70    3.97
  -7 -11   5    3.03    3.64
  -6 -11   5    3.74    1.49
  -6 -11   5   11.56    4.37
  -6 -11   5    9.63    3.69
  -6  11   5    4.78    1.89
  -5 -11   5   36.95    4.50
  -5 -11   5   27.70    2.30
  -5 -11   5   29.40    4.83
   5 -11  -5   35.36    3.60
   5 -11  -5   33.97    2.77
  -5  11   5   33.72    2.74
  -4 -11   5   11.87    3.97
  -4 -11   5    8.54    2.01
   4 -11  -5   10.18    2.82
  -4 -11   5    4.95    3.37
   4 -11  -5   11.74    2.56
  -3 -11   5    3.35    2.21
   3 -11  -5    3.64    2.58
   3 -11  -5    3.20    2.53
  -3 -11   5    8.38    3.25
  -3 -11   5    3.38    3.56
  -3  11   5    2.70    2.42
  -2 -11   5   43.05    4.26
   2 -11  -5   40.67    3.93
  -2 -11   5   53.20    4.06
  -2 -11   5   46.85    5.08
   2 -11  -5   41.42    3.35
  -2  11   5   46.20    3.74
  -1 -11   5    7.62    3.73
   1 -11  -5   10.20    2.36
  -1 -11   5   12.48    3.15
   1 -11  -5    9.32    3.27
  -1  11   5   12.33    2.70
  -1  11   5    6.58    2.88
   0 -11   5    4.90    2.82
   0 -11  -5    4.12    3.25
   0 -11   5   -1.12    3.43
   0 -11  -5    2.57    1.99
   0  11   5    2.47    2.95
   0  11   5    1.91    2.78
   1 -11   5   27.30    3.51
  -1 -11  -5   29.49    4.34
  -1 -11  -5   32.19    2.48
   1  11   5   29.15    3.80
  -2 -11  -5   38.97    4.69
   2 -11   5   33.97    3.64
  -3 -11  -5    1.33    3.69
   3 -11   5    1.84    2.75
   4 -11   5    8.13    2.81
  -4 -11  -5    4.14    4.01
  -5 -11  -5    0.66    3.94
   5 -11   5    2.79    2.09
  -6 -11  -5    2.09    4.16
  -7 -11  -5    7.05    4.56
  -8 -11  -5   -1.30    4.54
  -9 -11  -5    8.99    5.00
 -10 -11  -5   -3.36    4.94
 -11 -11  -5    2.53    5.41
 -12 -11  -5    1.10    5.62
 -16 -12   5   -4.20    5.63
 -15 -12   5    3.21    5.62
 -14 -12   5   -6.25    4.87
 -13 -12   5    4.02    4.93
 -12 -12   5   -1.63    4.42
 -11 -12   5   10.05    4.82
 -10 -12   5   10.07    4.42
  -9 -12   5    0.34    3.99
  -8 -12   5   -1.08    3.70
  -7 -12   5   -0.16    3.83
  -6 -12   5    6.30    3.76
   5 -12  -5   39.29    3.90
   5 -12  -5   41.02    3.79
  -5 -12   5   36.73    5.19
  -5 -12   5   38.84    4.66
  -5 -12   5   35.35    2.44
  -5  12   5   35.03    3.00
  -4 -12   5    5.47    3.95
   4 -12  -5    5.23    2.63
  -4 -12   5   -0.67    1.90
  -4 -12   5    5.71    3.45
   4 -12  -5    3.35    2.77
  -4  12   5    1.47    2.34
  -3 -12   5    6.84    3.37
  -3 -12   5    6.47    2.37
   3 -12  -5    8.58    2.77
  -3 -12   5    6.75    3.93
   3 -12  -5    6.90    2.92
  -3  12   5    9.94    2.75
   2 -12  -5   -1.54    2.47
   2 -12  -5    6.95    3.01
  -2 -12   5    5.35    3.14
  -2 -12   5   -4.31    3.43
  -2 -12   5   11.05    2.62
  -2  12   5   -1.82    2.67
  -1 -12   5    9.37    3.08
   1 -12  -5    7.66    2.40
   1 -12  -5   12.90    3.56
  -1 -12   5    2.52    3.79
  -1  12   5    0.67    2.98
  -1  12   5    6.23    2.11
   0 -12  -5   17.70    3.92
   0 -12  -5   15.39    2.28
   0 -12   5   17.62    4.29
   0 -12   5   12.25    3.25
   0  12   5   18.58    3.43
  -1 -12  -5   -2.96    1.79
  -1 -12  -5    0.17    3.63
   1 -12   5    3.30    2.99
   1  12   5   -1.30    3.15
   2 -12   5   20.30    3.35
  -2 -12  -5   21.31    4.28
   3 -12   5   23.64    3.25
  -3 -12  -5   17.47    4.40
   4 -12   5    8.52    2.81
  -4 -12  -5    5.25    4.11
   5 -12   5   25.57    3.15
  -5 -12  -5   22.19    4.79
  -6 -12  -5    2.14    4.33
   6 -12   5    8.01    2.59
  -7 -12  -5   29.52    5.53
  -8 -12  -5    4.58    4.83
  -9 -12  -5    4.46    5.08
 -10 -12  -5   14.25    5.73
 -11 -12  -5   -0.71    5.61
 -12 -12  -5   26.17    6.67
 -15 -13   5  -11.16    5.42
 -14 -13   5   -9.56    5.03
 -13 -13   5   -6.81    4.78
 -12 -13   5   -5.58    4.61
 -11 -13   5   -4.26    4.35
 -10 -13   5   -5.19    4.18
  -9 -13   5   11.52    4.50
  -8 -13   5   -3.69    3.95
  -7 -13   5    6.23    4.04
  -6 -13   5   18.14    4.28
   5 -13  -5    2.77    2.13
  -5 -13   5   -3.38    1.52
  -5 -13   5   -0.54    3.52
  -5 -13   5   -4.15    3.82
  -5  13   5   -1.09    1.33
  -4 -13   5   -4.11    3.34
  -4 -13   5    0.96    3.77
   4 -13  -5    3.74    2.56
  -4 -13   5   -0.85    1.84
   4 -13  -5   -0.82    2.74
  -4  13   5   -2.58    2.45
   3 -13  -5   14.32    3.22
   3 -13  -5   16.27    3.07
  -3 -13   5   22.42    4.43
  -3 -13   5   16.13    2.57
  -3 -13   5   22.41    3.87
  -3  13   5   12.91    3.07
   2 -13  -5    2.05    2.56
  -2 -13   5   -0.22    3.13
   2 -13  -5    1.31    3.02
  -2 -13   5    4.78    2.57
  -2 -13   5   -5.08    3.54
  -2  13   5   -2.54    2.79
  -1 -13   5   13.27    3.38
   1 -13  -5    9.50    3.55
   1 -13  -5   12.28    2.49
  -1 -13   5   10.98    4.12
  -1  13   5   11.64    3.34
   0 -13  -5   23.03    4.17
   0 -13   5   19.05    3.53
   0 -13  -5   18.99    2.40
   0 -13   5   25.00    4.58
  -1 -13  -5    0.36    3.72
   1 -13   5   -5.00    2.79
   1 -13   5    1.50    3.74
   2 -13   5   -2.99    2.80
  -2 -13  -5    1.49    3.76
   3 -13   5    8.76    3.03
  -3 -13  -5   10.33    4.21
  -4 -13  -5    2.24    4.12
   4 -13   5    1.37    2.68
  -5 -13  -5   -5.17    4.07
   5 -13   5    0.61    2.57
  -6 -13  -5    5.20    4.52
  -7 -13  -5   12.11    5.01
  -8 -13  -5    7.13    5.16
  -9 -13  -5    8.11    5.46
 -10 -13  -5    5.13    5.65
 -11 -13  -5   14.46    6.23
 -14 -14   5  -11.95    5.35
 -13 -14   5   -7.94    5.16
 -12 -14   5  -11.10    4.64
 -11 -14   5   12.33    5.24
 -10 -14   5    5.23    4.75
  -9 -14   5   -8.57    4.12
  -8 -14   5    6.28    4.35
  -7 -14   5   -3.05    3.90
  -6 -14   5    8.87    4.02
   5 -14  -5    2.80    2.18
  -5 -14   5   -1.47    3.53
   4 -14  -5    9.82    2.78
  -4 -14   5   13.82    4.15
  -4 -14   5   10.01    2.14
  -4 -14   5   11.58    3.97
   4 -14  -5   13.90    3.20
  -3 -14   5   18.51    2.71
   3 -14  -5   25.77    3.56
  -3 -14   5   24.25    4.62
  -3 -14   5   31.64    4.41
   2 -14  -5   21.98    3.70
  -2 -14   5   18.36    2.93
  -2 -14   5   17.29    3.67
  -2 -14   5   21.22    4.57
  -2  14   5   16.75    3.50
  -1 -14   5    7.93    2.76
  -1 -14   5   -0.59    3.66
  -1 -14   5   -3.31    2.89
   1 -14  -5    2.29    3.42
   0 -14  -5   19.10    4.10
   0 -14   5   12.62    4.19
   0 -14   5    6.40    3.21
  -1 -14  -5   -0.38    3.63
   1 -14   5   -1.01    3.68
   1 -14   5    4.35    3.06
  -2 -14  -5   35.46    5.12
   2 -14   5   44.76    5.21
   2 -14   5   36.63    3.97
  -3 -14  -5   -4.72    3.97
   3 -14   5   -0.87    2.83
  -4 -14  -5    9.49    4.36
  -5 -14  -5   -2.66    4.27
  -6 -14  -5   -1.65    4.49
  -7 -14  -5   13.40    5.09
  -8 -14  -5    1.16    5.09
  -9 -14  -5    3.19    5.42
 -12 -15   5    0.70    5.35
 -11 -15   5  -11.11    4.71
 -10 -15   5   -8.49    4.44
  -9 -15   5   -1.94    4.40
  -8 -15   5   -4.50    4.25
  -7 -15   5   -5.61    3.92
  -6 -15   5   -0.03    3.83
  -5 -15   5   -0.98    3.87
  -4 -15   5   -1.13    3.91
  -4 -15   5   -3.26    3.52
   4 -15  -5    7.19    2.76
  -3 -15   5   13.37    3.77
   3 -15  -5   12.02    3.24
  -3 -15   5    7.99    4.04
  -2 -15   5   13.84    2.85
  -2 -15   5   11.12    3.62
  -2 -15   5    3.16    3.92
   2 -15  -5   12.64    3.53
  -1 -15   5    8.03    2.94
   1 -15  -5    4.47    3.56
  -1 -15   5   -0.86    3.20
  -1 -15   5    1.03    3.98
   0 -15   5   -2.12    3.10
   0 -15   5    5.12    3.92
   0 -15  -5    1.24    3.61
   1 -15   5    2.23    3.12
   1 -15   5    5.53    3.97
  -1 -15  -5    3.29    4.04
   2 -15   5   -0.28    3.08
   2 -15   5    2.57    4.04
  -2 -15  -5   -4.24    3.95
  -3 -15  -5    0.99    4.13
   3 -15   5    8.70    4.13
  -4 -15  -5    3.70    4.46
  -5 -15  -5    5.18    4.62
  -6 -15  -5    7.23    4.96
  -7 -15  -5    2.84    5.01
  -8 -15  -5   -4.64    5.13
 -11 -16   5    1.98    5.43
 -10 -16   5    1.22    4.99
  -9 -16   5   -8.22    4.49
  -8 -16   5    0.06    4.55
  -7 -16   5   -3.90    4.08
  -6 -16   5   -4.56    4.09
  -5 -16   5   -6.34    3.77
  -4 -16   5   -2.18    3.62
  -3 -16   5    1.21    4.06
  -3 -16   5    2.12    3.68
  -2 -16   5    2.09    3.96
   2 -16  -5    4.29    3.51
  -2 -16   5    6.28    3.69
  -1 -16   5   -2.15    3.33
  -1 -16   5    2.24    4.06
   1 -16  -5    5.30    3.63
   0 -16   5   -3.35    3.21
   0 -16   5    0.44    3.96
   0 -16  -5    8.18    4.01
  -1 -16  -5    0.48    4.13
   1 -16   5    6.57    4.11
  -2 -16  -5   15.01    4.66
   2 -16   5   10.76    4.43
  -3 -16  -5    9.10    4.73
   3 -16   5    2.12    4.08
   4 -16   5   11.30    4.24
  -4 -16  -5   -1.58    4.55
  -5 -16  -5   10.77    5.08
  -6 -16  -5    1.17    4.99
  -8 -17   5  -11.88    4.40
  -7 -17   5  -11.11    4.29
  -6 -17   5   -2.05    4.24
  -5 -17   5   -3.62    4.05
  -4 -17   5   -3.37    3.96
  -3 -17   5   -3.40    3.88
  -2 -17   5   -3.96    4.08
  -2 -17   5   -4.43    3.72
  -1 -17   5    1.73    3.98
   0 -17  -5    3.96    4.16
   0 -17   5   -7.04    3.80
  -1 -17  -5    8.21    4.31
   1 -17   5   -4.84    3.94
  -2 -17  -5    3.06    4.28
  -3 -17  -5    0.83    4.45
  -4 -17  -5   -4.38    4.74
  -4 -18   5   -8.54    4.19
  -3 -18   5   -5.86    4.00
 -21   0   6   -5.92    5.11
 -20   0   6   -0.55    4.83
 -19   0   6   -8.67    4.34
 -18   0   6   34.99    5.10
 -17   0   6   -0.02    3.88
 -16   0   6   -3.37    3.42
 -15   0   6    6.36    3.63
 -14   0   6   12.38    3.56
 -13   0   6   63.52    5.35
 -12   0   6   25.05    3.52
 -11   0   6   16.59    3.19
  11   0  -6   20.63    2.88
 -10   0   6   91.10    5.66
  10   0  -6   91.80    5.06
  10   0  -6   86.92    6.43
   9   0  -6   11.11    2.42
   9   0  -6    6.31    3.16
  -9   0   6   10.21    2.96
   8   0  -6   20.75    2.51
   8   0  -6   17.13    3.50
  -8   0   6   12.03    3.10
   7   0  -6   21.27    2.54
  -7   0   6   18.20    3.10
   7   0  -6   28.77    3.63
  -6   0   6   10.11    2.15
  -6   0   6   11.54    2.65
   6   0  -6    8.09    1.92
  -5   0   6    1.02    2.52
  -5   0   6    1.50    1.84
   5   0  -6   -2.36    1.08
  -4   0   6    0.13    1.91
   4   0  -6   -0.16    0.58
   2   0  -6   29.92    2.43
  -1   0   6  139.15    5.76
   1   0  -6  149.89    5.91
   0   0   6   95.49    5.02
   0   0   6  104.76    5.69
   1   0   6   29.37    3.11
   1   0   6   36.64    3.26
   2   0   6  179.87    7.96
  -2   0  -6  192.70    8.58
  -3   0  -6  105.57    6.43
   3   0   6   99.68    6.33
   4   0   6   60.64    5.68
  -4   0  -6   68.39    6.15
  -5   0  -6   11.52    3.60
   5   0   6    9.92    2.85
   6   0   6    7.79    2.91
  -6   0  -6    9.10    3.45
  -7   0  -6   46.34    4.89
  -8   0  -6    6.94    4.09
  -9   0  -6    3.41    4.10
 -10   0  -6   92.54    7.78
 -11   0  -6    1.81    4.54
 -12   0  -6   36.71    5.71
 -13   0  -6    5.38    5.00
 -14   0  -6    6.35    5.29
 -15   0  -6    1.94    5.32
 -16   0  -6    6.00    5.61
 -21  -1   6  -13.06    4.91
 -21   1   6   -9.97    4.62
 -20  -1   6  -14.50    4.53
 -20   1   6  -10.76    4.26
 -19  -1   6  -12.72    4.23
 -19   1   6   -5.10    4.12
 -18  -1   6   -2.32    4.32
 -18   1   6  -10.27    3.72
 -17  -1   6    4.54    4.15
 -17   1   6    1.04    3.83
 -16  -1   6    3.60    3.72
 -16   1   6   -2.86    3.52
 -15  -1   6   15.62    4.02
 -15   1   6   11.83    3.69
 -14  -1   6   -0.64    3.28
 -14   1   6    2.72    3.18
 -13  -1   6   -0.06    3.13
 -13   1   6    4.05    2.93
 -12  -1   6    2.17    2.95
 -12   1   6    2.76    2.74
  12   1  -6    3.81    2.49
  11  -1  -6    8.69    2.49
 -11  -1   6    5.62    2.96
 -11   1   6   12.22    2.98
  11   1  -6    6.17    2.42
  10  -1  -6    1.67    2.27
  10  -1  -6    0.78    2.99
 -10  -1   6   -1.59    2.74
  10   1  -6   -1.15    2.12
 -10   1   6    1.07    2.64
   9  -1  -6    9.71    3.04
   9  -1  -6    5.97    2.31
  -9  -1   6    5.73    2.82
  -9   1   6    9.02    2.80
   9   1  -6    8.95    3.34
   9   1  -6    7.14    2.25
  -8  -1   6   55.41    5.15
   8  -1  -6   58.42    4.58
  -8  -1   6   61.24    5.30
   8  -1  -6   58.22    4.54
   8   1  -6   58.29    4.86
   8   1  -6   64.56    4.05
   7  -1  -6    7.26    1.98
  -7  -1   6    2.10    1.91
  -7  -1   6    0.81    2.71
   7   1  -6    1.80    3.02
  -7   1   6    3.20    2.39
   7   1  -6    2.84    1.97
   6  -1  -6   -0.85    0.85
  -6  -1   6    0.97    2.58
  -6  -1   6    1.36    1.97
  -6   1   6    1.37    2.32
   6   1  -6   -0.97    1.45
  -6   1   6   -3.10    1.81
  -5  -1   6    2.22    1.93
  -5  -1   6    0.20    2.71
   5  -1  -6   -0.03    0.30
   5   1  -6    1.15    1.40
  -5   1   6    0.31    1.86
  -5   1   6   -2.04    2.33
   4  -1  -6   -0.88    1.43
  -4  -1   6    2.97    1.96
  -4   1   6    1.71    1.96
   4   1  -6    0.30    1.62
   3  -1  -6   11.86    2.25
  -3  -1   6   13.47    2.36
  -3   1   6   15.69    2.33
   2  -1  -6   26.63    2.67
  -2  -1   6   31.97    2.75
  -2   1   6   33.07    2.81
   0  -1   6    7.88    2.38
   0  -1   6    7.79    2.41
   0  -1  -6   11.69    2.32
   0   1   6    8.96    2.29
   1  -1   6   25.23    3.00
  -1  -1  -6   20.66    3.16
   1  -1   6   26.78    2.85
   1   1   6   20.59    2.70
   1   1   6   24.77    3.01
  -2  -1  -6   10.57    3.12
   2  -1   6   10.55    2.70
   2   1   6   15.75    2.82
   2   1   6   11.00    2.76
  -3  -1  -6   13.44    3.36
   3  -1   6    7.86    2.70
  -3   1  -6    7.53    3.17
   3   1   6    9.64    2.92
   4  -1   6   10.59    2.89
  -4  -1  -6    4.96    3.17
   4   1   6    9.50    2.85
  -4   1  -6    6.68    3.22
  -5  -1  -6   24.60    3.90
   5  -1   6   24.91    3.28
  -5   1  -6   22.91    3.85
   5   1   6   20.91    3.30
   6  -1   6   23.45    3.26
  -6  -1  -6   23.02    3.97
  -6   1  -6   19.17    3.82
   6   1   6   21.90    3.43
   7  -1   6   -1.31    2.74
  -7  -1  -6    0.01    3.53
  -7   1  -6   -3.04    3.44
  -8  -1  -6   15.79    4.23
  -8   1  -6    7.26    4.05
  -9  -1  -6    7.22    4.30
  -9   1  -6   -0.63    4.07
 -10  -1  -6    0.71    4.38
 -10   1  -6    7.72    4.42
 -11  -1  -6    8.84    4.71
 -11   1  -6    4.54    4.51
 -12  -1  -6    9.17    5.02
 -12   1  -6    4.69    4.66
 -13  -1  -6   -0.30    4.87
 -13   1  -6    0.16    4.80
 -14  -1  -6    0.75    5.07
 -14   1  -6   12.74    5.38
 -15  -1  -6   -5.37    5.30
 -15   1  -6    2.07    5.33
 -16  -1  -6   -1.26    5.66
 -16   1  -6   10.10    5.64
 -21  -2   6   -8.64    5.23
 -20  -2   6   -3.71    4.95
 -20   2   6   -0.54    4.42
 -19  -2   6   -1.80    4.52
 -19   2   6   -3.61    4.14
 -18  -2   6    3.83    4.54
 -18   2   6    3.27    4.00
 -17  -2   6    1.75    4.20
 -17   2   6    2.65    3.73
 -16  -2   6   -1.28    3.77
 -16   2   6   -3.12    3.33
 -15  -2   6   -3.31    3.57
 -15   2   6   -0.33    3.22
 -14  -2   6    7.78    3.65
 -14   2   6    7.61    3.15
 -13  -2   6   37.21    4.40
 -13   2   6   33.51    3.67
 -12  -2   6   -0.57    2.98
 -12   2   6   -3.01    2.51
  12   2  -6    5.12    2.53
  11  -2  -6   25.26    3.77
 -11  -2   6   26.32    3.75
  11   2  -6   23.12    2.91
 -11   2   6   31.01    3.30
 -10  -2   6   20.72    3.47
  10  -2  -6   12.64    2.52
  10  -2  -6   13.41    3.14
  10   2  -6   14.85    2.54
 -10   2   6    9.14    2.70
   9  -2  -6   -4.37    2.56
   9  -2  -6    2.91    2.15
  -9  -2   6    7.20    2.97
   9   2  -6   -1.09    1.97
  -9   2   6    0.74    2.41
  -8  -2   6    2.37    2.86
   8  -2  -6    3.27    1.83
   8  -2  -6    1.24    2.71
  -8  -2   6    4.62    2.91
   8   2  -6    6.47    3.33
   8   2  -6    4.98    2.11
  -7  -2   6   -3.26    2.73
  -7  -2   6   -3.59    2.65
   7  -2  -6   -0.47    0.25
  -7  -2   6   -2.33    1.84
   7   2  -6    2.75    3.21
   7   2  -6    0.69    1.93
  -7   2   6   -0.86    2.15
   6  -2  -6   30.25    2.58
  -6  -2   6   29.33    2.59
  -6  -2   6   29.00    3.65
  -6   2   6   31.63    2.90
  -5  -2   6   87.38    4.39
  -5  -2   6   94.77    6.01
   5  -2  -6   92.81    4.55
  -5   2   6   85.26    4.82
  -5   2   6   92.94    4.44
   4  -2  -6   15.98    2.30
  -4  -2   6   15.95    2.19
   4   2  -6   13.95    2.09
  -4   2   6   13.21    2.17
  -3  -2   6   63.61    4.17
   3  -2  -6   68.86    4.37
  -3   2   6   63.74    3.92
   3   2  -6   68.18    4.10
   2  -2  -6   -1.28    1.91
  -2  -2   6    2.08    2.05
   2   2  -6    0.14    1.63
  -2   2   6    1.99    2.00
  -2   2   6   -1.01    1.96
  -1  -2   6   19.71    2.64
   1  -2  -6   19.34    2.46
  -1   2   6   20.84    2.56
   0  -2  -6    5.88    2.32
   0  -2   6    9.54    2.41
   0  -2  -6    7.34    2.64
   0   2   6   10.67    2.32
   0   2   6    0.89    1.32
   1  -2   6   -2.24    2.22
  -1  -2  -6   -1.61    2.60
   1   2   6   -1.53    2.18
   1   2   6    1.23    0.62
   2  -2   6    4.42    2.46
  -2  -2  -6   -0.82    2.77
   2   2   6    0.59    2.03
   2   2   6    3.94    2.46
  -3  -2  -6    1.07    3.04
   3  -2   6   -0.97    2.38
   3   2   6   -0.52    2.42
   3   2   6    0.16    2.56
   4  -2   6    2.27    2.43
  -4  -2  -6    0.98    3.02
   4   2   6    0.51    2.67
   5  -2   6   13.45    2.97
  -5  -2  -6   11.17    3.58
  -5   2  -6   13.32    3.50
   5   2   6   12.90    3.06
   6  -2   6    9.79    2.79
  -6  -2  -6    5.86    3.57
  -6   2  -6    6.77    3.40
  -7  -2  -6   38.13    4.81
   7  -2   6   36.81    3.86
  -7   2  -6   44.88    4.69
  -8  -2  -6   14.39    4.30
  -8   2  -6   15.39    4.15
  -9  -2  -6   47.22    5.59
  -9   2  -6   50.39    5.51
 -10  -2  -6   31.68    5.38
 -10   2  -6   35.18    5.27
 -11  -2  -6   19.07    5.15
 -11   2  -6   17.12    4.87
 -12  -2  -6   11.57    5.22
 -12   2  -6   13.02    4.78
 -13  -2  -6   -8.35    4.93
 -13   2  -6   -0.80    4.73
 -14  -2  -6   19.60    5.88
 -14   2  -6   15.13    5.46
 -15  -2  -6    5.74    5.60
 -15   2  -6    3.23    5.29
 -16  -2  -6    1.91    5.74
 -16   2  -6    5.01    5.47
 -20  -3   6  -10.03    4.86
 -19  -3   6   -3.00    4.75
 -19   3   6   -1.92    4.01
 -18  -3   6    2.62    4.62
 -18   3   6   -0.39    3.73
 -17  -3   6    4.04    4.36
 -17   3   6   -3.15    3.42
 -16  -3   6   -0.53    3.92
 -16   3   6    1.66    3.40
 -15  -3   6   26.06    4.60
 -15   3   6   24.24    3.62
 -14  -3   6   12.30    3.95
 -14   3   6    8.45    3.08
 -13  -3   6   -0.19    3.46
  13   3  -6   -3.57    2.42
 -13   3   6   -1.19    2.61
  12  -3  -6    0.24    3.30
 -12  -3   6    7.51    3.35
 -12   3   6    3.64    2.59
  12   3  -6    7.59    2.59
  11  -3  -6    4.63    2.99
 -11  -3   6    3.54    3.14
  11   3  -6    2.09    2.24
 -11   3   6    2.21    2.44
  10  -3  -6   13.05    2.15
 -10  -3   6   13.64    3.30
  10  -3  -6   18.82    3.21
 -10   3   6   19.77    2.76
  10   3  -6   16.53    2.47
   9  -3  -6    4.42    2.68
  -9  -3   6    2.16    2.90
  -9   3   6    3.08    2.35
   9   3  -6    4.61    2.14
   8  -3  -6   80.55    5.22
  -8  -3   6   88.79    6.03
   8  -3  -6   89.99    5.05
  -8  -3   6   77.48    6.26
   8   3  -6   93.24    4.88
  -7  -3   6   15.09    2.31
  -7  -3   6   16.17    3.40
  -7  -3   6   17.63    3.45
   7  -3  -6   16.28    2.59
   7   3  -6   13.32    3.68
  -6  -3   6    3.38    2.98
  -6  -3   6    7.00    2.02
   6  -3  -6    6.82    2.17
   6   3  -6   -1.85    1.33
  -6   3   6    5.32    2.02
  -5  -3   6   53.68    3.67
  -5  -3   6   55.71    4.54
   5  -3  -6   58.78    4.06
  -5   3   6   48.96    3.86
  -5   3   6   52.89    3.75
   4  -3  -6   13.74    2.24
  -4  -3   6   10.67    2.11
  -4   3   6   16.21    2.26
   4   3  -6   14.27    2.20
   3  -3  -6   81.12    4.57
  -3  -3   6   89.16    4.45
  -3   3   6   89.97    4.89
  -3   3   6   84.01    4.25
   2  -3  -6    3.86    2.02
  -2  -3   6    2.75    2.15
  -2   3   6    0.92    1.79
  -2   3   6    2.54    1.98
   1  -3  -6   22.13    2.99
   1  -3  -6   21.28    2.52
  -1  -3   6   24.22    2.74
  -1   3   6   23.44    2.59
   0  -3   6    1.68    2.28
   0  -3  -6    2.74    2.67
   0  -3  -6   -0.92    2.03
   0   3   6    2.11    2.05
   0   3   6    2.66    2.34
  -1  -3  -6    4.48    2.75
   1   3   6    2.98    2.29
   1   3   6    4.61    2.50
  -2  -3  -6    3.69    3.02
   2  -3   6    1.98    2.37
   2   3   6   -0.59    1.90
   2   3   6    2.83    2.36
   3  -3   6   11.29    2.68
  -3  -3  -6   14.38    3.41
   3   3   6   11.77    2.71
  -4  -3  -6   52.92    4.75
   4  -3   6   54.24    5.08
   4   3   6   59.30    4.65
   4   3   6   61.97    5.35
   5  -3   6    6.21    2.65
  -5  -3  -6    7.00    3.42
   5   3   6    3.11    2.81
   6  -3   6   44.88    3.81
  -6  -3  -6   35.27    4.43
   7  -3   6   -0.64    2.69
  -7  -3  -6   -1.07    3.46
  -7   3  -6    5.62    3.65
  -8  -3  -6   -2.23    3.74
   8  -3   6    8.54    3.06
  -8   3  -6    8.44    3.88
  -9  -3  -6    4.65    4.18
  -9   3  -6    4.63    4.14
 -10  -3  -6   13.69    4.78
 -10   3  -6   -0.02    4.23
 -11  -3  -6   -4.74    4.32
 -11   3  -6    3.30    4.39
 -12  -3  -6   16.31    5.34
 -12   3  -6   14.17    4.80
 -13  -3  -6   -2.11    4.96
 -13   3  -6    6.83    4.63
 -14  -3  -6    0.72    5.32
 -14   3  -6    4.36    4.75
 -15  -3  -6   -1.35    5.62
 -15   3  -6    9.75    5.04
 -20  -4   6   -7.54    5.06
 -19  -4   6   -6.85    4.79
 -18  -4   6    0.07    4.65
 -18   4   6   -0.31    3.59
 -17  -4   6    1.44    4.38
 -17   4   6   -1.16    3.35
 -16  -4   6    1.10    4.21
 -16   4   6    0.98    3.14
 -15  -4   6   15.18    4.35
 -15   4   6   15.67    3.40
 -14  -4   6    1.96    3.71
 -14   4   6   -0.09    2.70
 -13  -4   6    8.25    3.86
 -13   4   6   10.88    2.72
  13   4  -6   11.23    2.82
 -12  -4   6    1.29    3.34
  12  -4  -6    2.80    3.26
 -12   4   6   -0.85    2.32
  12   4  -6    4.75    2.41
 -11  -4   6   46.63    4.65
  11  -4  -6   47.80    4.16
  11   4  -6   47.64    3.49
 -11   4   6   49.22    3.99
  10  -4  -6    5.93    2.68
 -10  -4   6    6.48    3.18
  10   4  -6    7.52    2.26
 -10   4   6    4.17    2.24
   9  -4  -6   -1.63    2.17
  -9  -4   6    3.95    3.12
   9  -4  -6    3.87    2.53
   9   4  -6    2.14    2.03
  -9   4   6    2.41    2.17
  -8  -4   6   76.47    6.11
  -8  -4   6   75.87    6.11
   8  -4  -6   69.73    4.81
   8  -4  -6   78.97    4.64
   8   4  -6   78.45    4.28
  -7  -4   6    3.91    1.98
  -7  -4   6    6.55    3.14
  -7  -4   6    1.79    2.91
   7  -4  -6    1.76    2.22
   7   4  -6   -1.35    1.26
   6  -4  -6   93.83    4.95
  -6  -4   6   89.10    6.37
  -6  -4   6   96.47    4.37
  -6  -4   6   92.35    6.45
  -6   4   6   95.20    4.22
  -5  -4   6   63.69    3.85
   5  -4  -6   56.31    4.41
  -5  -4   6   61.14    4.98
  -5   4   6   62.12    3.56
   5   4  -6   42.66    3.01
  -5   4   6   62.09    4.32
   4  -4  -6   10.42    2.25
  -4  -4   6   11.93    2.27
  -4   4   6    7.26    2.14
   4   4  -6    6.28    1.96
  -4   4   6   10.11    2.32
   3  -4  -6  269.11    8.85
  -3  -4   6  267.16    8.75
  -3   4   6  292.53   10.08
  -3   4   6  266.01    8.64
   2  -4  -6   21.97    2.95
   2  -4  -6   22.18    2.49
  -2  -4   6   20.81    2.66
  -2   4   6   17.47    2.34
   1  -4  -6  104.66    6.06
   1  -4  -6  100.77    4.91
  -1  -4   6   94.56    5.20
  -1   4   6   95.94    4.48
  -1   4   6   93.50    5.56
   0  -4  -6   35.51    3.71
   0  -4  -6   41.27    3.06
   0   4   6   42.42    3.60
   0   4   6   34.33    2.88
  -1  -4  -6   28.91    3.59
   1   4   6   27.56    3.21
   1   4   6   27.81    2.73
   2  -4   6    0.99    2.40
  -2  -4  -6   -0.57    2.85
   2   4   6    4.03    2.62
   2   4   6    1.68    2.34
  -3  -4  -6   44.85    4.35
   3  -4   6   43.73    3.64
   3   4   6   41.29    3.38
   3   4   6   37.05    3.66
  -4  -4  -6   12.16    3.35
   4  -4   6   12.29    2.69
   4   4   6    9.84    2.72
  -5  -4  -6   24.78    3.90
   5  -4   6   18.28    2.84
   5   4   6   21.21    3.10
  -6  -4  -6    9.55    3.70
   6  -4   6   13.32    2.92
  -7  -4  -6    9.10    3.92
   7  -4   6    9.00    2.83
  -8  -4  -6    7.12    4.21
   8  -4   6    4.03    2.97
  -9  -4  -6   30.08    5.18
 -10  -4  -6   -0.08    4.50
 -11  -4  -6    2.37    4.68
 -12  -4  -6   -5.24    4.66
 -12   4  -6   10.54    4.51
 -13  -4  -6   -1.08    5.10
 -13   4  -6    6.86    4.61
 -14  -4  -6   12.23    5.70
 -14   4  -6   20.70    5.20
 -15  -4  -6   17.06    6.20
 -15   4  -6   20.36    5.24
 -20  -5   6   -2.84    5.40
 -19  -5   6   -6.91    4.88
 -18  -5   6    4.10    4.99
 -17  -5   6    4.87    4.62
 -17   5   6   -0.66    3.21
 -16  -5   6   -0.09    4.28
 -16   5   6    0.27    3.01
 -15  -5   6   -1.55    3.91
 -15   5   6   -2.99    2.72
 -14  -5   6    2.04    3.90
 -14   5   6   -0.64    2.64
  14   5  -6    1.77    2.64
  13  -5  -6   -0.32    3.35
 -13  -5   6   -0.27    3.71
  13   5  -6   -0.23    2.47
 -13   5   6   -2.58    2.35
  12  -5  -6   -1.45    3.00
 -12  -5   6   -0.30    3.44
  12   5  -6    0.81    2.34
 -12   5   6    0.60    2.12
 -11  -5   6    0.45    3.18
  11  -5  -6   -0.58    2.73
 -11   5   6   -2.78    1.96
  11   5  -6    0.22    2.22
  10  -5  -6   -1.31    2.43
 -10  -5   6   -1.96    3.15
  10   5  -6    1.19    2.10
 -10   5   6   -1.69    1.95
   9  -5  -6    1.99    2.30
   9  -5  -6    1.08    2.37
  -9  -5   6    2.81    3.06
   9   5  -6    0.68    1.89
  -9   5   6    2.14    2.06
  -8  -5   6    3.32    3.16
   8  -5  -6    7.62    2.43
  -8  -5   6    8.02    1.98
  -8  -5   6   -1.28    2.87
   8   5  -6   -0.58    1.49
  -7  -5   6   12.21    3.50
  -7  -5   6   14.15    3.27
  -7  -5   6   10.54    2.12
   7  -5  -6   14.14    2.64
   6  -5  -6   43.65    3.38
  -6  -5   6   50.65    3.51
  -6  -5   6   42.23    4.30
  -6  -5   6   42.85    4.64
  -6   5   6   51.09    3.99
  -5  -5   6   59.31    3.65
   5  -5  -6   51.01    3.46
  -5  -5   6   56.43    5.11
  -5   5   6   63.96    4.40
   5   5  -6   45.31    3.10
  -4  -5   6    7.33    3.43
  -4  -5   6   13.66    2.28
   4  -5  -6   12.38    2.43
  -4   5   6   14.73    2.44
   3  -5  -6    1.97    2.09
  -3  -5   6    2.41    2.06
  -3   5   6    3.87    2.02
  -3   5   6    4.31    1.99
   2  -5  -6    1.22    2.03
   2  -5  -6   -0.80    2.27
  -2  -5   6    2.53    2.33
  -2   5   6    2.38    1.90
  -2   5   6    1.69    1.60
   1  -5  -6    7.92    2.79
   1  -5  -6    6.22    2.14
  -1  -5   6    6.09    2.48
  -1   5   6    6.05    2.46
  -1   5   6    8.83    2.17
   0  -5  -6    0.35    2.10
   0  -5  -6   -1.27    2.66
   0   5   6    1.57    2.45
   0   5   6   -0.64    1.95
  -1  -5  -6   41.03    3.09
  -1  -5  -6   42.47    4.13
   1   5   6   43.98    3.78
   1   5   6   43.02    3.13
  -2  -5  -6    4.24    2.98
   2   5   6   -1.18    2.08
   2   5   6    6.10    2.81
   3  -5   6   44.60    3.45
  -3  -5  -6   38.45    4.19
   3   5   6   41.65    3.15
   3   5   6   33.28    3.82
   4  -5   6    5.62    2.41
  -4  -5  -6    6.91    3.29
   4   5   6    7.19    2.56
  -5  -5  -6   -1.77    3.18
   5  -5   6    4.53    2.46
   5   5   6    0.05    2.54
  -6  -5  -6   56.65    5.50
   6  -5   6   62.35    5.04
   6   5   6   69.57    5.00
  -7  -5  -6   -2.53    3.78
   7  -5   6    1.54    2.60
   8  -5   6   -1.32    2.83
  -8  -5  -6    1.48    4.13
   9  -5   6    2.01    3.04
  -9  -5  -6    3.22    4.53
 -10  -5  -6    4.44    4.72
 -11  -5  -6    5.16    4.96
 -12  -5  -6    2.55    5.08
 -13  -5  -6    5.07    5.33
 -14  -5  -6    4.17    5.57
 -15  -5  -6   -2.89    5.46
 -20  -6   6   -9.78    5.50
 -19  -6   6   -7.74    5.08
 -18  -6   6    3.93    5.13
 -17  -6   6    8.15    4.87
 -16  -6   6   -2.77    4.33
 -16   6   6    0.97    2.72
 -15  -6   6   14.77    4.64
 -15   6   6   11.15    2.73
 -14  -6   6    4.97    4.16
  14   6  -6   -0.31    2.66
 -14   6   6    1.40    2.37
 -13  -6   6   24.30    4.67
  13  -6  -6   22.19    3.90
  13   6  -6   33.16    3.33
 -13   6   6   22.75    2.69
 -12  -6   6    3.20    3.70
  12  -6  -6    4.47    2.96
 -12   6   6    2.46    2.05
  12   6  -6    3.86    2.49
  11  -6  -6   65.39    4.94
 -11  -6   6   79.06    6.50
 -11   6   6   73.38    3.94
  11   6  -6   65.84    4.64
 -10  -6   6   32.52    4.30
  10  -6  -6   27.29    3.00
  10   6  -6   34.73    2.85
 -10   6   6   29.52    2.41
  -9  -6   6   11.79    3.52
  -9   6   6    9.78    2.05
   9   6  -6   10.85    2.16
  -8  -6   6   21.32    2.28
  -8  -6   6   20.04    3.95
  -8  -6   6   21.52    3.75
   8  -6  -6   18.55    2.91
  -8   6   6   20.86    2.25
  -7  -6   6   11.00    2.08
  -7  -6   6    6.53    3.43
  -7  -6   6   10.31    3.14
   7  -6  -6   10.97    2.57
  -7   6   6   11.62    2.08
  -6  -6   6   13.38    2.10
   6  -6  -6   12.99    2.61
  -6  -6   6   10.98    3.35
  -6  -6   6    9.51    3.51
  -6   6   6    4.68    2.11
   6   6  -6    9.10    1.94
   5  -6  -6    2.02    2.12
  -5  -6   6   -2.95    2.81
  -5  -6   6    4.31    1.84
  -5  -6   6    2.13    3.29
   5   6  -6   -2.27    1.63
  -5   6   6   -2.02    1.95
  -4  -6   6    6.63    1.98
   4  -6  -6    4.56    2.23
  -4  -6   6    2.25    3.41
  -4   6   6    6.37    2.27
   3  -6  -6   99.35    5.07
   3  -6  -6   92.34    5.45
  -3  -6   6   90.01    4.54
  -3   6   6   89.11    4.46
  -2  -6   6   38.30    3.04
   2  -6  -6   31.30    2.81
   2  -6  -6   27.18    3.34
  -2   6   6   30.92    2.66
  -2   6   6   26.95    2.99
  -1  -6   6  232.61    8.26
   1  -6  -6  240.94    7.97
   1  -6  -6  242.20    9.85
  -1   6   6  246.50    9.60
  -1   6   6  242.78    7.78
   0  -6  -6   89.93    4.77
   0  -6  -6   94.87    6.34
   0   6   6   93.82    4.37
   0   6   6   90.65    6.10
  -1  -6  -6   20.82    3.53
  -1  -6  -6   17.09    2.48
   1   6   6   17.05    2.39
   1   6   6   19.84    3.14
  -2  -6  -6   20.92    3.54
   2   6   6   18.23    2.46
   2   6   6   16.78    3.23
   3  -6   6   -0.10    2.23
  -3  -6  -6   -1.32    2.95
   3   6   6   -2.39    2.05
   3   6   6   -0.93    2.84
   4  -6   6   61.02    4.81
  -4  -6  -6   52.12    5.00
   4   6   6   58.09    4.20
   5  -6   6   31.23    3.18
  -5  -6  -6   26.60    4.37
   5   6   6   34.70    3.25
   6  -6   6    0.48    2.39
  -6  -6  -6    2.33    3.67
   6   6   6    5.50    2.76
  -7  -6  -6   36.66    5.26
   7  -6   6   39.61    3.74
   7   6   6   45.46    3.88
   8  -6   6    3.26    2.87
  -8  -6  -6    2.29    4.35
   8   6   6    2.68    3.04
   9  -6   6   17.25    3.36
  -9  -6  -6   20.02    5.22
 -10  -6  -6    6.23    4.83
 -11  -6  -6    4.10    4.99
 -12  -6  -6    8.55    5.45
 -13  -6  -6   -0.48    5.31
 -14  -6  -6    4.25    5.87
 -15  -6  -6    8.40    6.14
 -19  -7   6   -5.39    5.42
 -18  -7   6   -3.73    5.10
 -17  -7   6   -3.25    4.73
 -16  -7   6   -5.41    4.43
 -15  -7   6   -4.28    4.21
 -14  -7   6    0.21    4.17
  14   7  -6   -0.61    2.57
 -13  -7   6   13.71    4.33
  13  -7  -6   16.13    3.45
  13   7  -6   12.17    2.73
  12  -7  -6    0.80    2.82
 -12  -7   6    6.45    3.97
  12   7  -6   -3.21    2.20
 -11  -7   6   10.22    3.92
  11  -7  -6   12.04    2.74
  11   7  -6   10.32    2.42
  10  -7  -6   20.07    2.59
 -10  -7   6   24.07    4.03
  10   7  -6   22.08    2.55
  -9  -7   6   31.40    4.34
  -8  -7   6    1.68    1.77
  -8  -7   6   -0.84    3.35
  -8  -7   6    2.00    3.12
  -8   7   6    3.00    1.61
   8   7  -6   -1.72    1.27
   7  -7  -6   12.65    2.80
  -7  -7   6   16.61    2.10
  -7  -7   6   16.81    3.65
  -7  -7   6   15.27    3.95
   7   7  -6   14.13    2.09
  -7   7   6   13.71    2.04
  -6  -7   6   13.03    2.00
  -6  -7   6   11.45    3.72
  -6  -7   6    8.50    3.10
   6  -7  -6   10.24    2.58
   6   7  -6    7.99    1.99
  -6   7   6    8.96    2.03
   5  -7  -6    3.77    2.24
  -5  -7   6    3.58    3.43
  -5  -7   6    3.42    1.81
  -5  -7   6    2.37    2.88
  -5   7   6    4.01    1.92
  -4  -7   6   27.81    3.76
   4  -7  -6   29.87    2.93
  -4  -7   6   31.29    2.58
  -4  -7   6   30.04    4.47
  -4   7   6   27.90    2.66
   3  -7  -6   10.14    2.52
  -3  -7   6   12.81    2.22
   3  -7  -6   11.55    2.40
   2  -7  -6   51.43    4.03
   2  -7  -6   61.92    4.07
  -2  -7   6   49.96    4.00
  -2   7   6   57.21    4.72
  -2   7   6   52.46    3.68
   1  -7  -6   24.83    2.59
   1  -7  -6   23.02    3.31
  -1  -7   6   25.88    3.01
  -1   7   6   27.74    2.47
  -1   7   6   28.18    3.14
   0  -7  -6   28.36    3.62
   0  -7  -6   27.39    2.65
   0   7   6   29.70    3.38
   0   7   6   29.40    2.47
  -1  -7  -6   17.95    2.44
  -1  -7  -6   20.26    3.37
   1   7   6   25.96    3.45
   1   7   6   22.73    2.43
  -2  -7  -6   -0.06    3.04
   2   7   6    0.36    2.84
   2   7   6    1.96    1.95
  -3  -7  -6    8.74    3.48
   3   7   6    9.43    2.18
  -4  -7  -6    3.75    3.50
   4  -7   6    2.66    2.29
   4   7   6    3.25    2.21
   5  -7   6    9.52    2.56
  -5  -7  -6    5.81    3.75
   5   7   6    5.82    2.46
  -6  -7  -6   14.77    4.43
   6  -7   6   12.12    2.75
   6   7   6   13.08    2.79
  -7  -7  -6   -0.90    4.06
   7  -7   6    1.66    2.67
   7   7   6    4.90    2.77
   8  -7   6   13.53    3.02
  -8  -7  -6   17.52    5.00
   8   7   6   14.42    3.21
   9  -7   6   11.20    3.06
  -9  -7  -6    8.79    4.84
   9   7   6   18.66    3.45
 -10  -7  -6   15.79    5.21
  10   7   6    5.02    3.28
 -11  -7  -6    4.47    5.16
  11   7   6    0.56    3.20
 -12  -7  -6    8.04    5.44
 -13  -7  -6    8.95    5.71
 -14  -7  -6    5.19    5.92
 -19  -8   6  -12.45    5.37
 -18  -8   6    4.69    5.60
 -17  -8   6  -13.31    4.52
 -16  -8   6   -7.92    4.53
 -15  -8   6   -4.34    4.42
 -14  -8   6    3.67    4.24
 -13  -8   6    2.09    4.11
  13   8  -6   10.55    2.47
 -12  -8   6    8.84    4.20
  12  -8  -6    3.03    2.57
  12   8  -6    2.17    2.28
 -11  -8   6    5.24    3.78
  11   8  -6    5.42    2.23
  -9  -8   6   13.98    3.79
   9   8  -6   -0.36    1.34
  -8  -8   6   45.19    3.34
  -8  -8   6   46.43    4.80
  -8  -8   6   37.33    5.07
   8   8  -6   46.13    3.52
  -7  -8   6   17.67    4.23
  -7  -8   6   27.86    4.06
   7  -8  -6   22.93    3.18
  -7  -8   6   22.07    2.23
  -7   8   6   21.81    2.05
   7   8  -6   23.31    2.42
  -6  -8   6    3.84    1.77
   6  -8  -6   -0.64    2.33
  -6  -8   6    3.05    3.13
  -6  -8   6    1.70    3.41
  -6   8   6    3.03    1.83
   5  -8  -6    9.96    2.48
  -5  -8   6    7.13    3.69
  -5  -8   6    4.78    1.84
  -5  -8   6    5.59    3.05
  -5   8   6    2.20    1.91
  -4  -8   6    8.72    3.17
  -4  -8   6   13.62    2.11
   4  -8  -6   12.55    2.56
   4  -8  -6    7.48    2.32
  -4  -8   6   13.67    3.89
  -3  -8   6    2.64    2.98
   3  -8  -6    4.81    2.45
  -3  -8   6    2.53    3.64
   3  -8  -6    5.19    2.30
  -3  -8   6    5.18    2.01
  -3   8   6    3.61    2.23
   2  -8  -6   18.72    2.51
   2  -8  -6   24.72    3.15
  -2  -8   6   20.55    2.71
  -2   8   6   20.09    2.83
   1  -8  -6   28.46    3.54
   1  -8  -6   24.43    2.67
  -1   8   6   26.31    3.18
   0  -8  -6   49.44    3.88
   0  -8  -6   42.61    4.09
   0   8   6   41.39    3.30
   0   8   6   49.72    4.02
  -1  -8  -6    1.17    2.00
  -1  -8  -6    1.24    2.98
   1   8   6    1.46    1.81
   1   8   6    1.43    2.77
  -2  -8  -6   10.73    3.55
   2   8   6   11.08    2.14
  -3  -8  -6    7.44    3.48
   3   8   6    5.54    2.06
   4  -8   6   43.21    3.53
  -4  -8  -6   46.47    5.05
   4   8   6   44.25    3.12
   5  -8   6   17.39    2.78
  -5  -8  -6   14.32    4.27
   5   8   6   13.68    2.58
   6  -8   6   10.33    2.79
  -6  -8  -6   13.98    4.57
   6   8   6   12.44    2.60
   7  -8   6   37.69    3.59
  -7  -8  -6   31.27    5.43
   7   8   6   41.21    3.40
   8  -8   6   10.25    2.84
  -8  -8  -6   11.17    4.93
   8   8   6   14.83    3.05
  -9  -8  -6    6.73    4.97
   9   8   6   11.82    3.12
 -10  -8  -6    4.62    5.13
  10   8   6    5.43    3.04
 -11  -8  -6   -2.35    5.06
  11   8   6   -2.44    2.98
 -12  -8  -6   11.89    5.73
 -13  -8  -6    6.53    5.86
 -14  -8  -6    9.15    6.22
 -18  -9   6  -12.55    5.30
 -17  -9   6   -2.84    4.99
 -16  -9   6   -4.66    4.70
 -15  -9   6   -1.09    4.61
 -14  -9   6    1.46    4.26
 -13  -9   6    4.34    4.28
 -12  -9   6   29.84    4.92
  12   9  -6   25.40    2.59
 -11  -9   6   17.31    4.38
 -10  -9   6    5.01    3.86
  10   9  -6    3.12    1.71
  -9  -9   6  100.33    7.46
   9   9  -6   83.00    4.37
  -8  -9   6    5.58    3.66
  -8  -9   6    4.95    4.13
  -7  -9   6  127.48    8.11
  -7  -9   6  126.12    4.76
  -7  -9   6  125.60    7.85
  -7   9   6  108.03    4.97
  -6  -9   6   30.55    2.40
   6  -9  -6   33.65    3.43
  -6  -9   6   28.44    4.20
  -6  -9   6   28.38    4.65
  -6   9   6   25.36    2.41
  -5  -9   6    6.63    3.35
  -5  -9   6    8.41    3.86
   5  -9  -6   15.26    2.82
  -5  -9   6    9.28    2.00
  -5   9   6   10.27    2.16
  -4  -9   6   58.10    5.57
  -4  -9   6   57.59    4.70
  -4  -9   6   46.45    3.49
   4  -9  -6   51.13    3.72
   4  -9  -6   48.20    4.31
  -3  -9   6   24.16    3.65
   3  -9  -6   29.28    2.99
  -3  -9   6   24.39    4.35
   3  -9  -6   19.06    2.99
  -3  -9   6   17.31    2.52
  -3   9   6   20.69    2.78
   2  -9  -6   26.36    3.40
  -2  -9   6   24.34    2.88
   2  -9  -6   25.64    2.75
  -2  -9   6   23.45    3.56
  -2   9   6   23.34    3.07
   1  -9  -6    1.32    2.12
   1  -9  -6    0.85    2.87
  -1   9   6    2.65    2.58
   0  -9  -6    5.36    2.12
   0  -9  -6    5.68    3.05
   0   9   6    2.35    2.78
  -1  -9  -6   20.36    2.43
  -1  -9  -6   17.22    3.66
   1   9   6   20.33    2.20
   1   9   6   10.08    3.34
  -2  -9  -6    3.25    3.43
   2   9   6    1.13    1.81
  -3  -9  -6    9.93    3.87
   3   9   6    9.24    2.07
   4  -9   6    1.72    2.34
  -4  -9  -6   -1.68    3.74
   4   9   6    0.37    1.98
  -5  -9  -6   20.68    4.76
   5  -9   6   17.64    2.87
   5   9   6   17.41    2.39
  -6  -9  -6    2.87    4.31
   6  -9   6    2.37    2.51
   6   9   6    1.40    2.21
  -7  -9  -6   -4.85    4.33
   7  -9   6    1.64    2.55
   7   9   6   -0.49    2.25
  -8  -9  -6   22.90    5.37
   8   9   6   21.90    2.87
  -9  -9  -6   30.21    5.80
   9   9   6   32.51    3.31
 -10  -9  -6    3.86    5.20
  10   9   6    0.86    2.68
 -11  -9  -6    5.66    5.44
 -12  -9  -6    1.17    5.59
 -13  -9  -6   17.73    6.44
 -18 -10   6   -6.69    5.74
 -17 -10   6   -5.32    5.29
 -16 -10   6   -4.05    4.96
 -15 -10   6   -7.40    4.47
 -14 -10   6   12.07    5.20
 -13 -10   6   10.27    4.72
 -12 -10   6    4.53    4.36
 -11 -10   6    2.32    4.02
  11  10  -6   -0.63    1.82
 -10 -10   6    4.66    4.02
  -9 -10   6   -1.29    3.75
  -8 -10   6   31.53    4.54
  -7 -10   6    5.49    4.08
  -7 -10   6    4.83    3.68
  -7 -10   6    5.25    1.83
  -6 -10   6    6.03    3.59
  -6 -10   6   12.88    4.32
  -6 -10   6    8.10    1.89
   6 -10  -6   12.98    3.04
  -6  10   6    2.47    1.96
  -5 -10   6   44.02    4.68
  -5 -10   6   39.68    2.84
   5 -10  -6   42.79    3.64
  -5 -10   6   41.75    5.27
   4 -10  -6    0.33    2.30
  -4 -10   6    5.09    3.31
   4 -10  -6    3.20    2.58
  -4 -10   6   -4.07    1.86
  -4 -10   6    1.01    3.64
  -4  10   6   -0.13    2.21
   3 -10  -6   24.66    3.22
   3 -10  -6   29.38    3.17
  -3 -10   6   27.27    2.92
  -3 -10   6   29.58    3.99
  -3 -10   6   23.39    4.50
  -3  10   6   24.76    3.06
   2 -10  -6   18.77    3.22
  -2 -10   6   13.37    3.30
  -2 -10   6   13.87    4.13
  -2 -10   6   14.73    2.69
   2 -10  -6   17.15    2.62
  -2  10   6   12.34    2.38
  -2  10   6    8.08    2.83
   1 -10  -6    2.89    3.10
   1 -10  -6    3.67    2.26
  -1 -10   6   -0.62    2.72
  -1  10   6   -2.44    2.56
  -1  10   6   -2.04    2.16
   0 -10  -6   23.43    2.60
   0 -10  -6   16.81    3.55
   0 -10   6   24.15    3.48
   0  10   6   15.84    3.31
  -1 -10  -6    3.45    2.09
  -1 -10  -6    0.71    3.38
  -2 -10  -6   43.38    4.94
  -3 -10  -6    4.24    3.87
   3  10   6    3.66    1.79
  -4 -10  -6   16.32    4.49
   4  10   6   17.12    2.09
   5 -10   6   17.40    2.83
  -5 -10  -6   15.74    4.71
   5  10   6   16.14    2.18
  -6 -10  -6    1.99    4.42
   6 -10   6    1.91    2.37
   6  10   6   -0.10    1.95
  -7 -10  -6   17.75    5.19
   7  10   6   17.59    2.33
  -8 -10  -6   -4.67    4.60
   8  10   6   -1.73    2.11
  -9 -10  -6    7.99    5.27
 -10 -10  -6    4.88    5.44
 -11 -10  -6    2.89    5.56
 -12 -10  -6    6.50    5.74
 -17 -11   6   -9.00    5.43
 -16 -11   6   -0.37    5.21
 -15 -11   6   -3.95    4.88
 -14 -11   6   -4.60    4.68
 -13 -11   6    0.47    4.53
 -12 -11   6   16.40    4.91
 -11 -11   6    2.90    4.12
 -10 -11   6   -2.30    3.97
  -9 -11   6    0.56    3.88
  -8 -11   6   -3.82    3.64
  -7 -11   6   58.85    6.30
  -7 -11   6   56.77    5.49
  -7 -11   6   69.83    3.63
  -6 -11   6   18.98    4.82
  -6 -11   6   15.06    2.10
  -6 -11   6   22.81    4.24
  -6  11   6   15.48    2.33
  -5 -11   6   19.47    4.03
   5 -11  -6   17.47    3.23
  -5 -11   6   10.23    2.21
  -5 -11   6   10.87    4.38
  -4 -11   6   16.21    2.47
  -4 -11   6   16.22    3.86
   4 -11  -6   15.55    2.95
  -4 -11   6   17.46    4.38
   4 -11  -6   18.07    3.19
  -4  11   6   12.01    2.72
  -3 -11   6   12.85    3.58
  -3 -11   6    7.42    3.90
  -3 -11   6    9.10    2.54
   3 -11  -6   10.80    2.86
   3 -11  -6    6.62    2.87
  -3  11   6    3.34    2.73
   2 -11  -6   40.72    4.20
  -2 -11   6   41.85    4.22
  -2 -11   6   40.74    5.17
   2 -11  -6   47.03    3.49
  -2 -11   6   47.56    3.66
  -2  11   6   38.74    3.95
  -2  11   6   43.81    3.35
   1 -11  -6    8.12    3.39
   1 -11  -6    7.38    2.44
  -1 -11   6    5.26    3.05
  -1 -11   6    7.78    4.00
  -1  11   6   -0.44    1.88
  -1  11   6    1.18    3.07
   0 -11  -6   23.74    2.68
   0 -11   6   23.89    3.54
   0 -11  -6   19.96    3.92
   0  11   6   23.99    3.42
   1 -11   6    8.91    3.18
  -1 -11  -6   10.83    2.26
  -1 -11  -6    8.86    3.82
   2 -11   6    6.31    3.03
  -2 -11  -6   -2.17    3.75
  -3 -11  -6   19.86    4.61
  -4 -11  -6   10.81    4.58
   5 -11   6    8.92    2.56
  -5 -11  -6    6.35    4.52
   5  11   6    5.91    1.63
  -6 -11  -6   21.86    5.23
   6  11   6   19.76    1.96
  -7 -11  -6   12.36    5.05
  -8 -11  -6    6.95    5.11
  -9 -11  -6    0.99    5.16
 -10 -11  -6    0.70    5.37
 -11 -11  -6    0.80    5.72
 -12 -11  -6    7.31    6.09
 -16 -12   6   -3.94    5.54
 -15 -12   6   -4.89    5.08
 -14 -12   6  -11.28    4.65
 -13 -12   6   -6.86    4.69
 -12 -12   6    3.46    4.56
 -11 -12   6    7.52    4.73
 -10 -12   6    8.50    4.33
  -9 -12   6   -0.90    3.98
  -8 -12   6   -0.38    3.84
  -7 -12   6    5.57    3.82
  -7 -12   6    8.71    4.62
  -7 -12   6   10.47    1.75
  -6 -12   6   11.96    2.00
  -6 -12   6   16.71    4.70
  -6 -12   6   20.95    4.18
  -6  12   6    8.11    2.18
   5 -12  -6   -4.66    2.73
  -5 -12   6   -1.14    1.91
  -5 -12   6   -3.33    4.06
  -5 -12   6   -1.11    3.45
  -5  12   6   -3.66    2.07
   4 -12  -6   -0.64    2.79
  -4 -12   6   -2.48    3.32
  -4 -12   6   -2.00    2.06
   4 -12  -6    1.77    2.72
  -4 -12   6    2.68    4.11
  -4  12   6   -3.18    2.47
  -3 -12   6   19.52    4.58
  -3 -12   6   30.69    4.25
   3 -12  -6   27.49    3.38
  -3 -12   6   27.15    3.09
   3 -12  -6   27.64    3.66
  -3  12   6   25.48    3.39
   2 -12  -6    1.24    2.56
  -2 -12   6   -0.54    3.11
  -2 -12   6    0.18    3.85
   2 -12  -6    4.91    3.24
  -2 -12   6    2.71    2.62
  -2  12   6    1.70    2.87
  -1 -12   6    1.65    2.62
  -1 -12   6    3.42    3.03
   1 -12  -6    3.40    3.31
  -1 -12   6    5.72    3.86
   1 -12  -6   -0.98    2.35
  -1  12   6   -1.90    1.57
   0 -12   6    1.97    3.78
   0 -12  -6   -1.35    2.17
   0 -12  -6    2.22    3.40
   0 -12   6    0.87    2.96
   0  12   6   -5.39    2.85
   1 -12   6    4.49    3.07
  -1 -12  -6   -1.34    3.62
  -1 -12  -6    3.15    2.10
   1  12   6    1.80    3.24
  -2 -12  -6    0.30    3.81
   2 -12   6   -0.01    2.87
   3 -12   6   -0.76    2.90
  -3 -12  -6    1.69    4.08
   4 -12   6   12.74    3.12
  -4 -12  -6    7.06    4.47
  -5 -12  -6    6.50    4.62
  -6 -12  -6    0.74    4.58
  -7 -12  -6    8.28    5.20
  -8 -12  -6   12.76    5.54
  -9 -12  -6    0.99    5.23
 -10 -12  -6    3.56    5.71
 -11 -12  -6   10.74    6.15
 -15 -13   6  -11.21    5.09
 -14 -13   6   -2.23    5.30
 -13 -13   6   -7.59    4.71
 -12 -13   6    8.07    5.08
 -11 -13   6    8.12    4.72
 -10 -13   6    9.82    4.70
  -9 -13   6    0.53    4.06
  -8 -13   6   13.24    4.60
  -7 -13   6   -2.05    3.81
  -6 -13   6   16.86    4.26
  -6 -13   6   14.64    1.97
  -6 -13   6   17.70    4.88
  -5 -13   6   -2.04    4.05
  -5 -13   6    1.67    3.58
  -5 -13   6    0.95    1.92
   5 -13  -6    6.87    2.46
  -5  13   6    1.25    2.36
  -4 -13   6   10.96    3.76
  -4 -13   6   14.27    4.35
   4 -13  -6    9.84    3.14
   4 -13  -6   10.44    3.01
  -4 -13   6    9.24    2.33
  -4  13   6    7.47    2.76
  -3 -13   6   -0.61    3.73
  -3 -13   6   -0.74    2.41
   3 -13  -6    2.74    3.05
   3 -13  -6   -0.56    2.70
  -3 -13   6    2.99    3.33
  -3  13   6   -3.09    2.68
  -2 -13   6   29.03    4.88
  -2 -13   6   25.37    3.98
  -2 -13   6   38.01    3.54
   2 -13  -6   30.69    3.30
   2 -13  -6   27.88    4.07
  -2  13   6   25.16    3.74
   1 -13  -6    9.42    3.57
   1 -13  -6    4.50    2.47
  -1 -13   6   22.91    3.19
  -1 -13   6    6.85    3.39
  -1 -13   6    9.17    4.23
   0 -13   6   12.51    4.30
   0 -13  -6   10.65    3.91
   0 -13   6   12.60    3.42
   1 -13   6   27.92    3.81
  -1 -13  -6   27.90    4.72
  -2 -13  -6    5.10    4.12
   2 -13   6    0.16    2.94
  -3 -13  -6   18.31    4.78
   3 -13   6   19.16    3.33
   4 -13   6   -3.75    2.80
  -4 -13  -6    0.08    4.27
  -5 -13  -6   -1.47    4.54
  -6 -13  -6   13.92    5.17
  -7 -13  -6    2.91    5.08
  -8 -13  -6    3.28    5.38
  -9 -13  -6    5.34    5.66
 -10 -13  -6    2.17    5.74
 -14 -14   6   -9.41    5.24
 -13 -14   6   -3.07    5.24
 -12 -14   6  -10.00    4.66
 -11 -14   6   -6.28    4.67
 -10 -14   6   -3.19    4.27
  -9 -14   6   -5.31    4.15
  -8 -14   6   -5.50    3.91
  -7 -14   6    7.02    4.25
  -6 -14   6   13.50    4.30
  -6 -14   6    8.07    4.64
  -5 -14   6   -2.65    3.83
   5 -14  -6    8.29    2.54
  -5 -14   6   -1.23    3.68
  -4 -14   6   21.63    2.59
   4 -14  -6   25.95    3.44
  -4 -14   6   18.80    4.67
  -4 -14   6   27.94    4.37
  -3 -14   6   15.25    3.81
   3 -14  -6   16.78    3.49
  -3 -14   6   17.87    4.48
  -3 -14   6   19.16    2.88
  -2 -14   6   -1.42    3.14
  -2 -14   6   -1.95    3.78
   2 -14  -6    0.95    3.28
  -2 -14   6    2.03    2.72
   1 -14  -6    4.40    3.57
  -1 -14   6    3.42    4.04
  -1 -14   6    8.38    3.01
  -1 -14   6    2.81    3.27
   0 -14   6   -0.67    3.10
   0 -14   6    1.76    3.98
   0 -14  -6    1.23    3.69
   1 -14   6    4.60    3.19
   1 -14   6    5.84    3.85
  -1 -14  -6    2.55    4.14
   2 -14   6   -3.10    3.02
  -2 -14  -6    6.15    4.23
   3 -14   6    0.67    2.96
  -3 -14  -6    4.51    4.39
  -4 -14  -6    1.96    4.41
  -5 -14  -6    7.09    4.80
  -6 -14  -6    2.08    5.01
  -7 -14  -6   -3.11    5.19
  -8 -14  -6    6.79    5.67
  -9 -14  -6    0.36    5.73
 -12 -15   6   -2.74    5.15
 -11 -15   6   -6.25    4.71
 -10 -15   6    4.48    4.93
  -9 -15   6    6.11    4.54
  -8 -15   6   -2.92    4.11
  -7 -15   6   -3.11    4.00
  -6 -15   6    7.42    4.10
  -5 -15   6   -2.70    3.74
  -5 -15   6    6.33    4.47
  -4 -15   6   27.66    4.90
   4 -15  -6   30.86    3.74
  -4 -15   6   23.59    4.51
  -3 -15   6    2.87    3.53
  -3 -15   6   -4.80    3.87
   3 -15  -6    7.99    3.29
   2 -15  -6   26.25    4.11
  -2 -15   6   30.85    3.55
  -2 -15   6   25.63    4.08
  -2 -15   6   24.15    5.11
  -1 -15   6   -0.12    3.19
  -1 -15   6    3.41    2.96
   1 -15  -6    7.35    3.83
  -1 -15   6   -0.49    3.94
   0 -15  -6    8.93    4.11
   0 -15   6    9.97    4.25
   0 -15   6    4.16    3.41
   1 -15   6    6.13    3.39
   1 -15   6    9.65    4.41
  -1 -15  -6   10.27    4.22
  -2 -15  -6    3.14    4.13
   2 -15   6   -1.63    3.10
   2 -15   6    7.71    4.20
   3 -15   6    9.96    4.19
  -3 -15  -6    2.52    4.38
  -4 -15  -6    6.49    4.67
  -5 -15  -6    5.17    5.00
  -6 -15  -6    7.51    5.20
  -7 -15  -6   12.22    5.66
 -11 -16   6   -5.12    5.10
 -10 -16   6   -6.76    4.60
  -9 -16   6   -9.73    4.51
  -8 -16   6   -3.29    4.48
  -7 -16   6    0.30    4.26
  -6 -16   6   -5.16    3.95
  -5 -16   6   -3.58    3.85
  -4 -16   6    4.83    3.88
  -4 -16   6   -5.47    3.91
  -3 -16   6    3.27    3.71
  -3 -16   6   -0.39    3.94
   2 -16  -6    7.05    3.64
  -2 -16   6   -9.11    3.25
  -2 -16   6   -5.03    4.08
   1 -16  -6   -1.65    3.71
  -1 -16   6   -2.53    3.36
  -1 -16   6    2.36    4.13
   0 -16   6    0.39    3.97
   0 -16  -6    5.54    3.94
   0 -16   6    5.02    3.14
   0 -16   6   -7.20    3.20
   1 -16   6    2.30    4.10
  -1 -16  -6   -1.56    4.12
  -2 -16  -6    6.85    4.57
   2 -16   6    2.17    4.19
   3 -16   6    2.14    4.03
  -3 -16  -6    0.91    4.59
   4 -16   6    4.74    4.04
  -4 -16  -6    2.66    4.59
  -5 -16  -6    3.70    4.94
  -8 -17   6   -4.85    4.57
  -7 -17   6   -0.46    4.70
  -6 -17   6   -4.54    4.38
  -5 -17   6   -7.99    3.99
  -4 -17   6    1.87    3.98
  -3 -17   6   -3.01    4.07
  -3 -17   6    2.47    3.78
  -2 -17   6   -3.13    4.10
  -2 -17   6    9.54    4.07
  -1 -17   6    3.61    4.54
   0 -17   6    3.58    4.38
   0 -17  -6    8.89    4.34
   1 -17   6    9.47    4.47
  -1 -17  -6   16.39    4.82
  -2 -17  -6    1.53    4.44
  -3 -17  -6    7.16    4.98
 -21   0   7  -11.23    4.78
 -20   0   7  -14.28    4.26
 -19   0   7  -11.80    4.21
 -18   0   7   -5.28    3.79
 -17   0   7   -3.63    3.63
 -16   0   7   -6.76    3.29
 -15   0   7   -0.35    3.42
 -14   0   7    3.37    3.31
 -13   0   7    0.79    3.03
 -12   0   7    0.78    2.91
  11   0  -7   -1.17    2.29
 -11   0   7    1.36    2.86
  10   0  -7   -1.57    3.20
  10   0  -7   -0.34    2.27
 -10   0   7    1.00    2.84
  -9   0   7   -2.79    2.79
   9   0  -7   -1.30    2.11
   9   0  -7   -1.62    3.06
   8   0  -7    0.70    2.17
  -8   0   7    3.08    2.86
  -7   0   7    0.56    2.75
   7   0  -7    2.27    2.12
  -7   0   7    1.78    2.11
   6   0  -7   -0.65    1.94
  -6   0   7    2.15    2.01
  -6   0   7   -2.85    2.69
  -5   0   7    0.57    1.97
   5   0  -7    1.04    1.39
  -4   0   7   -1.66    1.95
   4   0  -7   -0.64    0.54
  -3   0   7   -1.02    2.03
   3   0  -7   -0.20    0.41
   2   0  -7    0.83    2.12
  -2   0   7   -3.13    2.07
   1   0  -7   -0.89    2.22
  -1   0   7    2.33    2.30
  -1   0   7    1.77    1.08
   0   0   7   -0.35    2.38
   0   0   7    2.46    2.50
   1   0   7   -0.63    2.46
   1   0   7   -0.19    2.45
   2   0   7   -0.62    2.58
   2   0   7   -0.69    2.56
   3   0   7   -1.97    2.58
  -3   0  -7    3.19    3.23
   4   0   7   -2.58    2.68
  -4   0  -7    0.41    3.26
   5   0   7   -0.39    2.63
  -5   0  -7    1.69    3.39
  -6   0  -7    0.75    3.61
  -7   0  -7    1.52    3.95
  -8   0  -7    1.63    4.16
  -9   0  -7    2.64    4.52
 -10   0  -7   -6.39    4.41
 -11   0  -7    1.08    4.69
 -12   0  -7    3.13    4.85
 -13   0  -7    3.04    5.11
 -14   0  -7    7.25    5.47
 -15   0  -7    0.80    5.55
 -21  -1   7  -12.07    4.84
 -21   1   7   -8.38    4.69
 -20  -1   7   -7.25    4.57
 -20   1   7   -7.70    4.26
 -19  -1   7   -1.50    4.62
 -19   1   7   -0.32    4.28
 -18  -1   7   -2.33    4.15
 -18   1   7   -3.89    3.85
 -17  -1   7    9.51    4.36
 -17   1   7   10.04    3.98
 -16  -1   7    1.21    3.77
 -16   1   7   -0.14    3.45
 -15  -1   7   15.50    4.02
 -15   1   7   15.14    3.78
 -14  -1   7    5.48    3.57
 -14   1   7    2.80    3.22
 -13  -1   7    8.82    3.39
 -13   1   7    6.16    3.04
 -12  -1   7    5.40    3.22
 -12   1   7    8.93    3.06
 -11  -1   7    0.68    3.04
  11   1  -7    1.94    2.36
 -11   1   7    1.84    2.72
  10  -1  -7   -0.84    3.15
  10  -1  -7    4.89    2.39
 -10  -1   7    1.06    2.95
 -10   1   7    4.63    2.79
  10   1  -7    0.72    2.13
   9  -1  -7   48.00    4.51
  -9  -1   7   41.21    4.15
   9  -1  -7   49.11    3.59
  -9  -1   7   48.31    4.39
   9   1  -7   43.27    3.38
   9   1  -7   52.17    4.87
  -8  -1   7    1.16    2.94
  -8  -1   7   -3.09    2.03
   8  -1  -7    1.18    2.10
   8   1  -7   -0.31    2.16
  -8   1   7    6.06    2.63
  -7  -1   7   40.57    3.12
   7  -1  -7   31.85    2.93
  -7  -1   7   42.12    4.06
   7   1  -7   37.60    3.13
  -7   1   7   41.09    3.67
  -7   1   7   40.30    3.14
  -6  -1   7   25.31    3.62
  -6  -1   7   22.45    2.59
   6   1  -7   22.39    2.58
  -6   1   7   18.70    3.10
  -6   1   7   21.49    2.61
  -5  -1   7   74.36    4.44
   5   1  -7   71.06    4.71
  -5   1   7   73.84    4.42
  -4  -1   7    7.17    2.23
   4  -1  -7    6.36    2.20
   4   1  -7    4.45    1.91
  -4   1   7    5.33    2.18
   3  -1  -7    3.87    2.09
  -3  -1   7   -0.71    2.14
  -3   1   7   -0.22    2.03
   3   1  -7    1.10    1.29
   2  -1  -7   18.64    2.61
  -2  -1   7   17.92    2.57
  -2   1   7   10.47    2.36
  -2   1   7   19.26    2.65
  -1  -1   7   61.04    4.73
   1  -1  -7   65.58    4.82
  -1   1   7   65.42    4.35
   0  -1   7   77.75    5.59
   0  -1   7   88.11    4.99
   0   1   7   80.68    4.87
  -1  -1  -7   99.31    6.32
   1  -1   7   93.55    5.47
   1  -1   7   87.53    5.80
   1   1   7   89.48    6.27
   1   1   7   96.34    5.63
   2  -1   7   18.00    3.09
  -2  -1  -7   14.82    3.48
   2   1   7   16.61    3.09
   2   1   7   15.98    3.10
   3  -1   7   15.09    3.04
  -3  -1  -7   10.87    3.45
   3   1   7   16.06    3.01
   3   1   7   12.50    3.10
   4  -1   7    4.06    2.80
  -4  -1  -7    3.26    3.36
  -4   1  -7    4.35    3.41
   4   1   7    7.22    2.92
   5  -1   7    9.72    2.95
  -5  -1  -7    5.66    3.61
   5   1   7    4.15    2.90
  -5   1  -7    6.48    3.51
  -6  -1  -7   42.05    4.92
  -6   1  -7   40.51    4.78
  -7  -1  -7    0.00    3.81
  -7   1  -7    1.93    3.85
  -8  -1  -7   15.61    4.65
  -8   1  -7   22.01    4.82
  -9  -1  -7   14.85    4.86
  -9   1  -7   12.54    4.72
 -10  -1  -7   52.42    6.17
 -10   1  -7   53.25    6.11
 -11  -1  -7   24.25    5.53
 -11   1  -7   23.82    5.33
 -12  -1  -7    8.88    5.16
 -12   1  -7   10.77    5.21
 -13  -1  -7    5.41    5.34
 -13   1  -7    9.66    5.28
 -14  -1  -7   -2.34    5.30
 -14   1  -7    3.42    5.34
 -15  -1  -7    7.47    5.74
 -15   1  -7   12.31    5.77
 -21  -2   7  -10.27    4.90
 -20  -2   7  -11.06    4.55
 -20   2   7   -7.37    4.13
 -19  -2   7   -2.69    4.49
 -19   2   7   -7.17    3.94
 -18  -2   7   -2.40    4.09
 -18   2   7   -5.82    3.88
 -17  -2   7    6.79    4.33
 -17   2   7    3.16    3.62
 -16  -2   7   -3.12    3.70
 -16   2   7   -3.62    3.30
 -15  -2   7   -1.26    3.58
 -15   2   7    4.36    3.27
 -14  -2   7    1.71    3.54
 -14   2   7   -4.03    3.00
 -13  -2   7   11.75    3.65
 -13   2   7   16.44    3.21
 -12  -2   7   22.57    3.88
 -12   2   7   22.72    3.35
  12   2  -7   23.91    3.10
  11  -2  -7   18.41    3.64
 -11  -2   7   20.74    3.63
  11   2  -7   15.72    2.77
 -11   2   7   18.64    3.16
  10  -2  -7   12.78    2.63
  10  -2  -7   10.44    3.43
 -10  -2   7   12.63    3.27
 -10   2   7   10.81    2.90
  10   2  -7   12.36    2.58
  -9  -2   7   11.93    3.39
  -9  -2   7   13.19    3.29
   9  -2  -7   15.67    3.37
   9  -2  -7   13.07    2.52
   9   2  -7   18.62    2.64
  -8  -2   7    1.11    3.06
  -8  -2   7    2.23    2.09
  -8  -2   7    4.56    3.12
   8   2  -7    4.78    2.20
  -8   2   7    4.70    2.47
  -7  -2   7    1.06    3.06
  -7  -2   7    2.65    2.12
  -7   2   7    5.68    2.49
   7   2  -7    5.65    2.16
  -6  -2   7   26.34    2.70
   6  -2  -7   23.25    2.76
  -6  -2   7   21.05    3.67
   6   2  -7   28.06    2.75
  -6   2   7   23.68    2.67
  -6   2   7   21.29    2.99
   5  -2  -7   14.37    2.39
  -5  -2   7   14.02    2.39
  -5   2   7   18.86    2.52
   5   2  -7   14.71    2.35
  -4  -2   7    3.10    2.20
   4  -2  -7    4.96    2.12
   4   2  -7    5.08    2.11
  -4   2   7    1.32    2.11
  -3  -2   7    5.08    2.21
   3  -2  -7    4.23    2.19
  -3   2   7    2.39    1.84
   3   2  -7    2.38    2.20
  -3   2   7    6.39    2.22
   2  -2  -7   76.47    4.82
  -2  -2   7   89.55    4.82
  -2   2   7   75.96    4.75
   2   2  -7   85.83    4.90
  -2   2   7   80.33    5.35
  -1  -2   7    1.20    2.41
   1  -2  -7    2.12    2.27
  -1   2   7    2.04    2.17
  -1   2   7    2.30    2.38
   0  -2   7    4.21    2.49
   0  -2  -7    2.10    2.31
   0  -2  -7   -1.60    2.78
   0   2   7    2.43    2.37
   0   2   7   -1.83    2.29
   1  -2   7    8.96    2.70
   1  -2   7    8.72    2.70
  -1  -2  -7    3.90    3.04
   1   2   7    3.81    2.50
   2  -2   7   32.44    3.44
  -2  -2  -7   27.44    4.01
   2   2   7   27.45    3.40
   2   2   7   31.17    3.40
   3  -2   7   -2.03    2.45
  -3  -2  -7   -0.75    3.09
   3   2   7   -0.65    2.64
   3   2   7    2.47    2.79
   4  -2   7   21.05    3.13
  -4  -2  -7   16.35    3.80
   4   2   7   22.23    3.39
   4   2   7   17.95    3.11
  -5  -2  -7    3.37    3.45
   5  -2   7    8.00    2.87
  -6  -2  -7    0.38    3.57
   6  -2   7    2.53    2.75
  -6   2  -7    0.63    3.50
  -7  -2  -7    9.52    4.06
  -7   2  -7   -5.06    3.66
  -8  -2  -7    6.52    4.32
  -8   2  -7    7.49    4.20
  -9  -2  -7    0.32    4.46
  -9   2  -7    0.75    4.37
 -10  -2  -7    0.34    4.53
 -10   2  -7    1.20    4.33
 -11  -2  -7   14.99    5.18
 -11   2  -7   11.34    4.78
 -12  -2  -7    5.59    5.10
 -12   2  -7   -1.44    4.63
 -13  -2  -7    2.59    5.22
 -13   2  -7    2.13    4.97
 -14  -2  -7    3.05    5.51
 -14   2  -7   17.14    5.38
 -15  -2  -7    3.82    5.86
 -15   2  -7    9.79    5.41
 -21  -3   7  -12.29    5.19
 -20  -3   7   -3.57    5.06
 -19  -3   7   -7.17    4.51
 -19   3   7   -0.42    3.92
 -18  -3   7  -10.58    4.09
 -18   3   7   -5.34    3.50
 -17  -3   7   11.82    4.59
 -17   3   7   13.64    3.79
 -16  -3   7   12.05    4.31
 -16   3   7    6.98    3.37
 -15  -3   7    3.04    3.89
 -15   3   7    7.45    3.24
 -14  -3   7   16.49    4.16
 -14   3   7   16.03    3.29
 -13  -3   7   -0.31    3.42
 -13   3   7    2.56    2.77
 -12  -3   7   28.32    4.24
  12  -3  -7   28.32    4.14
  12   3  -7   31.51    3.32
 -12   3   7   35.03    3.44
 -11  -3   7   29.03    4.17
  11  -3  -7   25.10    3.75
  11   3  -7   26.93    3.06
 -11   3   7   27.73    3.19
 -10  -3   7    6.18    3.24
  10  -3  -7    4.58    2.99
  10   3  -7    5.31    2.35
 -10   3   7    1.11    2.55
  -9  -3   7  122.83    6.98
  -9  -3   7  113.85    7.03
   9   3  -7  123.95    5.78
  -8  -3   7   16.59    2.47
  -8  -3   7   17.13    3.56
   8  -3  -7   16.47    2.66
  -8  -3   7   18.07    3.62
   8   3  -7   19.93    2.56
  -7  -3   7    7.98    2.24
  -7  -3   7    3.26    3.14
   7  -3  -7    5.67    2.36
  -7   3   7    7.76    2.37
   7   3  -7    7.40    2.19
  -6  -3   7    1.08    3.15
   6  -3  -7    0.80    2.22
  -6  -3   7   -2.21    2.03
  -6   3   7    3.55    2.13
   6   3  -7    1.73    2.06
  -6   3   7   -0.51    2.39
  -5  -3   7  160.97    6.32
   5  -3  -7  158.43    6.42
   5   3  -7  163.02    6.37
  -5   3   7  164.69    6.26
   4  -3  -7    7.15    2.24
  -4  -3   7    6.81    2.37
  -4   3   7    9.04    2.26
  -4   3   7    1.18    1.60
   4   3  -7    7.31    2.29
  -3  -3   7  169.18    6.48
   3  -3  -7  164.40    6.46
   3   3  -7  169.84    6.55
  -3   3   7  160.60    6.43
   2  -3  -7   80.58    4.73
  -2  -3   7   79.66    4.76
  -2   3   7   88.40    5.44
  -2   3   7   82.30    4.49
   1  -3  -7   -2.75    2.75
   1  -3  -7    2.70    2.30
  -1  -3   7    3.21    2.54
  -1   3   7    1.45    2.53
  -1   3   7    0.24    2.19
   0  -3  -7  171.96    6.98
   0  -3  -7  176.90    8.24
   0  -3   7  174.66    7.25
   0   3   7  187.44    8.20
   0   3   7  186.47    6.99
  -1  -3  -7   67.38    6.06
   1   3   7   62.11    5.80
   1   3   7   60.99    4.61
  -2  -3  -7   18.26    3.63
   2  -3   7   19.07    3.02
   2   3   7   17.33    2.89
   2   3   7    7.43    2.06
   3  -3   7   25.73    3.17
  -3  -3  -7   15.68    3.57
   3   3   7   25.46    3.21
   4  -3   7   12.85    2.96
  -4  -3  -7   15.23    3.80
   4   3   7   17.36    3.19
  -5  -3  -7   50.81    5.05
   5  -3   7   59.15    5.20
   5   3   7   48.04    4.03
  -6  -3  -7   23.22    4.45
   6  -3   7   30.80    3.68
  -7  -3  -7    2.70    4.01
  -8  -3  -7  125.97    8.52
  -9  -3  -7   17.89    5.14
  -9   3  -7   20.48    4.81
 -10  -3  -7    0.34    4.65
 -10   3  -7    3.42    4.52
 -11  -3  -7    4.96    4.89
 -11   3  -7    7.72    4.72
 -12  -3  -7    9.44    5.41
 -12   3  -7   10.72    4.95
 -13  -3  -7   11.32    5.80
 -13   3  -7   11.72    5.16
 -14  -3  -7    3.99    5.58
 -14   3  -7    3.12    5.05
 -15  -3  -7    4.50    5.87
 -15   3  -7    9.90    5.50
 -20  -4   7  -11.73    4.98
 -19  -4   7  -15.29    4.47
 -18  -4   7    4.38    4.57
 -18   4   7    2.51    3.57
 -17  -4   7   -5.35    4.19
 -17   4   7   -2.40    3.27
 -16  -4   7   -2.99    4.00
 -16   4   7   -2.05    3.04
 -15  -4   7   -1.09    3.90
 -15   4   7   -0.72    2.97
 -14  -4   7    3.77    3.86
 -14   4   7   -1.21    2.69
 -13  -4   7   13.14    4.00
 -13   4   7   19.61    3.02
  13   4  -7   18.95    3.14
  12  -4  -7   -0.14    3.11
 -12  -4   7    4.15    3.56
 -12   4   7   -0.93    2.47
  12   4  -7   -1.92    2.42
 -11  -4   7   17.15    3.86
  11  -4  -7   19.97    3.53
 -11   4   7   19.68    2.91
  11   4  -7   22.61    2.95
 -10  -4   7    2.64    3.25
  10  -4  -7    2.55    2.75
  10   4  -7    3.04    2.24
 -10   4   7    0.38    2.38
  -9  -4   7    7.13    3.25
   9  -4  -7    3.11    2.45
  -9  -4   7    7.77    3.40
   9   4  -7    5.47    2.20
  -8  -4   7   -4.16    2.87
   8  -4  -7   -1.50    2.28
  -8  -4   7    0.85    2.02
  -8  -4   7    2.38    3.23
   8   4  -7    1.98    2.03
  -7  -4   7   56.65    3.77
  -7  -4   7   58.95    5.11
  -7  -4   7   54.75    4.69
   7  -4  -7   64.82    4.51
  -7   4   7   57.97    3.74
   7   4  -7   55.65    4.16
  -6  -4   7   -1.67    3.26
  -6  -4   7    2.10    2.14
   6  -4  -7    0.96    2.24
   6   4  -7    0.44    2.03
  -6   4   7    0.02    1.96
  -5  -4   7    2.66    2.17
   5  -4  -7    2.42    2.32
  -5  -4   7    9.06    3.54
  -5   4   7    2.21    1.84
   5   4  -7    7.94    2.26
  -5   4   7    4.46    2.24
  -4  -4   7   52.14    3.58
   4  -4  -7   59.39    4.46
   4   4  -7   55.06    3.63
  -4   4   7   49.51    4.00
   3  -4  -7   -0.50    2.17
  -3  -4   7   -1.30    2.15
  -3   4   7   -3.38    2.09
  -3   4   7    4.50    2.40
  -2  -4   7   25.37    2.94
   2  -4  -7   30.44    2.85
  -2   4   7   29.39    2.82
  -2   4   7   22.93    3.13
  -1  -4   7   13.47    2.84
   1  -4  -7   14.42    3.18
   1  -4  -7   14.99    2.57
  -1   4   7   14.54    2.94
  -1   4   7   12.63    2.45
   0  -4   7   52.24    3.98
   0  -4  -7   51.51    4.56
   0  -4  -7   60.05    4.35
   0   4   7   50.32    3.57
   0   4   7   59.22    4.37
  -1  -4  -7   42.23    4.22
   1   4   7   45.81    4.00
   1   4   7   44.92    3.38
   2  -4   7   45.40    3.78
  -2  -4  -7   40.43    4.35
   2   4   7   46.36    3.55
   2   4   7   40.54    3.93
   3  -4   7    7.27    2.68
  -3  -4  -7    2.19    3.30
   3   4   7    6.73    2.63
   3   4   7    6.98    2.61
   4  -4   7    0.80    2.41
  -4  -4  -7    0.10    3.21
   4   4   7   -0.19    2.58
   5  -4   7   18.92    3.16
  -5  -4  -7   19.17    4.20
   5   4   7   16.37    3.21
   6  -4   7    8.22    2.89
  -6  -4  -7    3.28    3.84
   6   4   7    4.88    3.01
   7  -4   7    9.31    3.08
  -7  -4  -7    6.34    4.19
  -8  -4  -7   -4.67    4.20
  -9  -4  -7    1.94    4.58
 -10  -4  -7   18.22    5.31
 -11  -4  -7    3.99    4.96
 -12  -4  -7   10.29    5.44
 -13  -4  -7    3.74    5.50
 -14  -4  -7    3.06    5.72
 -20  -5   7  -15.52    5.09
 -19  -5   7   -2.61    4.86
 -18  -5   7   -4.48    4.54
 -17  -5   7   -5.95    4.33
 -17   5   7   -2.88    3.04
 -16  -5   7    4.47    4.37
 -16   5   7   -6.31    2.87
 -15  -5   7   -0.30    3.93
 -15   5   7   -3.45    2.69
 -14  -5   7   13.15    4.36
 -14   5   7    9.11    2.77
 -13  -5   7    8.56    3.96
  13  -5  -7    8.62    3.49
  13   5  -7   11.77    2.92
 -13   5   7   10.52    2.69
  12  -5  -7   45.75    4.37
 -12  -5   7   47.23    4.95
 -12   5   7   55.53    4.30
  12   5  -7   52.72    3.90
  11  -5  -7    0.50    2.79
 -11  -5   7    0.42    3.40
 -11   5   7    3.39    2.38
  11   5  -7    2.77    2.36
 -10  -5   7    5.72    3.45
  10   5  -7    8.35    2.36
 -10   5   7    9.77    2.49
  -9  -5   7   40.18    4.50
  -9  -5   7   43.49    4.81
   9   5  -7   48.36    3.29
  -8  -5   7    0.36    1.96
  -8  -5   7    1.47    3.08
   8  -5  -7   -3.04    2.35
  -8  -5   7    0.54    3.32
   8   5  -7    1.57    2.06
  -7  -5   7   61.04    3.93
  -7  -5   7   62.71    5.00
   7  -5  -7   53.56    3.85
  -7  -5   7   57.96    5.25
   7   5  -7   60.42    4.21
  -6  -5   7   11.96    2.35
   6  -5  -7   10.01    2.53
  -6  -5   7    8.13    3.53
   6   5  -7    9.14    2.28
  -6   5   7    5.77    1.83
  -6   5   7   11.80    2.38
  -5  -5   7   -0.84    3.39
   5  -5  -7    2.73    2.31
  -5  -5   7    0.53    2.08
   5   5  -7   -0.02    2.12
  -5   5   7    1.37    1.70
   4  -5  -7  216.29    7.96
  -4  -5   7  223.00    7.64
   4   5  -7  222.58    7.93
  -4   5   7  220.56    7.72
  -3  -5   7   93.61    4.84
   3  -5  -7   84.06    4.85
  -3   5   7   80.12    4.53
  -3   5   7   91.36    5.50
   2  -5  -7  203.19    8.71
  -2  -5   7  203.19    7.53
   2  -5  -7  197.37    7.31
  -2   5   7  203.69    7.31
  -2   5   7  204.96    8.72
   1  -5  -7    5.48    2.94
  -1  -5   7    6.85    2.69
   1  -5  -7    2.30    2.28
  -1   5   7    4.42    2.25
  -1   5   7    4.38    2.73
   0  -5  -7   26.18    3.70
   0  -5  -7   28.55    2.98
   0   5   7   29.07    3.42
   0   5   7   22.77    2.70
  -1  -5  -7  148.58    8.16
   1   5   7  162.12    7.91
   1   5   7  154.78    6.25
  -2  -5  -7   13.71    3.44
   2   5   7   15.79    2.62
   2   5   7   16.52    3.22
  -3  -5  -7    7.29    3.51
   3  -5   7    7.89    2.62
   3   5   7    5.70    2.51
   4  -5   7   35.88    3.45
  -4  -5  -7   30.35    4.42
   4   5   7   30.71    3.37
  -5  -5  -7   47.78    5.16
   5  -5   7   60.74    5.33
   5   5   7   56.83    4.27
  -6  -5  -7   17.17    4.30
   6  -5   7   22.48    3.38
   6   5   7   16.74    3.36
   7  -5   7    8.17    3.02
  -7  -5  -7   10.34    4.34
   7   5   7   10.53    3.35
  -8  -5  -7   17.02    4.84
   8   5   7    6.73    3.40
  -9  -5  -7    1.53    4.48
 -10  -5  -7   17.65    5.22
 -11  -5  -7    0.31    4.92
 -12  -5  -7    4.82    5.30
 -13  -5  -7   19.33    6.18
 -14  -5  -7   11.13    6.17
 -20  -6   7  -13.82    5.38
 -19  -6   7   -4.64    5.05
 -18  -6   7   -4.21    4.79
 -17  -6   7   -2.23    4.63
 -16  -6   7    5.50    4.48
 -16   6   7    2.11    2.74
 -15  -6   7    6.38    4.26
 -15   6   7   -3.61    2.54
 -14  -6   7    2.88    4.06
  14  -6  -7    7.83    3.55
  14   6  -7    4.81    2.85
 -14   6   7   -3.81    2.29
  13  -6  -7    4.06    3.23
 -13  -6   7   -1.82    3.79
 -13   6   7   -2.03    2.20
  13   6  -7    2.01    2.57
  12  -6  -7    6.18    3.12
 -12  -6   7    3.40    3.74
 -12   6   7   -0.35    2.11
  12   6  -7    0.67    2.47
 -11  -6   7   21.59    4.25
  11  -6  -7   26.27    3.27
 -11   6   7   23.48    2.70
  11   6  -7   26.02    2.95
 -10  -6   7   -3.80    3.31
 -10   6   7   -1.64    2.14
  10   6  -7    0.62    2.15
  -9  -6   7    4.54    2.09
  -9  -6   7    2.42    3.36
  -9  -6   7    9.25    3.71
   9   6  -7    4.23    2.14
  -8  -6   7    1.12    1.99
  -8  -6   7    2.18    3.07
  -8  -6   7   -0.49    3.32
   8  -6  -7    0.90    2.44
  -8   6   7   -1.50    1.92
   8   6  -7    0.94    1.99
  -7  -6   7    5.63    2.04
   7  -6  -7    5.25    2.52
  -7  -6   7    6.88    3.24
  -7  -6   7    4.77    3.43
  -7   6   7    4.55    2.17
   7   6  -7    5.70    2.20
   6  -6  -7  105.88    5.76
  -6  -6   7  108.36    7.08
  -6  -6   7  111.73    7.06
  -6  -6   7  112.89    5.07
   6   6  -7  103.01    5.19
  -6   6   7  117.74    5.61
   5  -6  -7   39.34    3.41
  -5  -6   7   40.54    4.78
  -5  -6   7   38.16    3.00
   5   6  -7   47.85    3.35
   4  -6  -7    1.34    2.20
  -4  -6   7   -0.46    1.98
  -4   6   7    2.51    2.07
  -4   6   7    0.49    1.87
   3  -6  -7   10.35    2.46
  -3  -6   7   10.15    2.46
  -3   6   7   10.45    2.70
  -3   6   7   11.03    2.32
   2  -6  -7    3.28    2.25
   2  -6  -7    4.37    2.74
  -2  -6   7    4.93    2.52
  -2   6   7    5.84    2.50
  -2   6   7    7.12    2.22
   1  -6  -7   10.74    3.13
  -1  -6   7   11.72    2.77
   1  -6  -7   13.04    2.47
  -1   6   7   12.16    2.46
  -1   6   7   18.26    3.01
   0  -6  -7    1.47    2.94
   0  -6  -7   -1.65    2.19
   0   6   7    2.62    2.15
   0   6   7    2.85    2.60
  -1  -6  -7    1.43    2.99
  -1  -6  -7    2.40    2.18
   1   6   7    3.83    2.80
   1   6   7    0.51    2.18
  -2  -6  -7   33.26    4.23
   2   6   7   32.74    3.06
   2   6   7   31.61    3.75
   3  -6   7   37.93    3.55
  -3  -6  -7   32.25    4.31
   3   6   7   30.44    3.07
  -4  -6  -7    3.99    3.59
   4  -6   7    8.09    2.70
   4   6   7    0.46    2.47
   5  -6   7    1.83    2.58
  -5  -6  -7    1.45    3.63
   5   6   7    3.15    2.76
   6  -6   7   13.90    3.07
  -6  -6  -7   11.61    4.25
   6   6   7   12.47    3.20
   7  -6   7    6.80    3.05
  -7  -6  -7    6.36    4.33
   7   6   7    6.33    3.16
  -8  -6  -7    5.81    4.47
   8  -6   7    4.69    3.00
   8   6   7    1.01    3.20
  -9  -6  -7    6.74    4.82
   9   6   7    4.16    3.40
 -10  -6  -7    2.44    4.75
  10   6   7    1.11    3.21
 -11  -6  -7    8.18    5.21
 -12  -6  -7   -2.10    5.14
 -13  -6  -7   -2.52    5.43
 -14  -6  -7    3.51    6.01
 -19  -7   7    3.31    5.50
 -18  -7   7   -1.03    5.00
 -17  -7   7    8.06    5.06
 -16  -7   7    4.44    4.59
 -15  -7   7    7.80    4.62
 -15   7   7    3.07    2.30
 -14  -7   7    3.59    4.33
  14   7  -7    6.72    2.83
 -14   7   7    2.89    2.18
  13  -7  -7    3.90    3.09
 -13  -7   7    0.03    3.88
  13   7  -7    7.12    2.58
 -13   7   7   -6.84    1.87
  12  -7  -7   58.79    4.80
 -12  -7   7   49.34    5.42
  12   7  -7   56.55    3.87
 -12   7   7   54.29    3.68
 -11  -7   7    7.05    3.79
 -11   7   7    4.85    1.95
  11   7  -7   10.12    2.52
 -10  -7   7   51.09    5.32
 -10   7   7   67.59    4.30
  10   7  -7   71.72    4.42
 -10   7   7   71.22    4.07
  -9  -7   7   21.90    4.41
  -9  -7   7   12.34    3.82
  -9  -7   7   18.73    2.45
  -9   7   7   12.08    2.21
   9   7  -7   15.74    2.43
  -8  -7   7    9.28    3.56
  -8  -7   7    6.62    2.14
  -8  -7   7    6.01    3.80
  -8   7   7    6.33    2.07
   8   7  -7    6.88    2.22
  -7  -7   7  118.84    7.96
  -7  -7   7  125.07    7.64
  -7  -7   7  127.25    5.28
   7  -7  -7  119.70    6.39
   7   7  -7  127.34    5.71
  -7   7   7  138.78    5.80
  -6  -7   7    0.76    1.90
  -6  -7   7    2.18    3.40
   6  -7  -7    3.22    2.34
  -6  -7   7   -0.25    3.05
  -6   7   7    3.17    2.08
   6   7  -7   -1.05    1.98
   5  -7  -7    3.49    2.46
  -5  -7   7    9.23    3.32
  -5  -7   7   11.02    2.26
  -5  -7   7    8.91    3.79
   4  -7  -7    4.52    2.42
  -4  -7   7   -0.85    3.42
  -4  -7   7   -0.72    1.95
  -4   7   7    2.47    2.17
   3  -7  -7    5.87    2.55
   3  -7  -7    0.74    2.24
  -3  -7   7    6.24    2.39
  -3   7   7    6.36    2.38
  -3   7   7    3.62    2.05
  -2  -7   7   49.63    3.72
   2  -7  -7   53.11    3.53
   2  -7  -7   48.85    4.13
  -2   7   7   52.19    3.87
  -2   7   7   55.95    5.11
  -1  -7   7   12.14    2.84
   1  -7  -7   11.43    3.04
   1  -7  -7    5.70    2.31
  -1   7   7    9.58    2.75
  -1   7   7    7.28    2.20
   0  -7  -7    9.64    2.43
   0  -7  -7   13.18    3.36
   0   7   7    9.74    2.36
   0   7   7   13.94    3.03
  -1  -7  -7   73.38    4.53
  -1  -7  -7   73.40    6.30
   1   7   7   63.71    6.00
   1   7   7   70.46    4.22
  -2  -7  -7    3.51    3.31
   2   7   7    0.16    2.06
  -3  -7  -7    6.36    3.56
   3  -7   7    7.43    2.68
   3   7   7    9.96    2.54
  -4  -7  -7    8.46    3.89
   4  -7   7   11.47    2.87
   4   7   7    7.64    2.59
   5  -7   7   55.32    5.13
  -5  -7  -7   45.77    5.34
   5   7   7   50.34    3.83
   6  -7   7   12.40    2.99
  -6  -7  -7   12.79    4.53
   6   7   7   12.58    3.05
   7  -7   7    7.35    3.02
  -7  -7  -7    5.60    4.44
   7   7   7    1.79    3.03
  -8  -7  -7    5.01    4.58
   8  -7   7    4.71    2.99
   8   7   7    8.48    3.30
  -9  -7  -7   15.92    5.09
   9   7   7    8.03    3.44
 -10  -7  -7    3.34    5.09
  10   7   7    0.97    3.37
 -11  -7  -7    4.12    5.31
  11   7   7    4.86    3.53
 -12  -7  -7    5.61    5.53
  12   7   7    5.57    3.65
 -13  -7  -7    5.74    5.70
 -19  -8   7   -1.32    5.53
 -18  -8   7   -0.48    5.26
 -17  -8   7   -2.60    4.74
 -16  -8   7   -0.08    4.72
 -15  -8   7   14.43    4.92
 -14  -8   7   -0.42    4.08
 -13  -8   7   -5.02    3.99
  13   8  -7   -1.50    2.44
 -12  -8   7    6.35    4.05
  12   8  -7    3.70    2.39
 -11  -8   7    5.91    3.85
  11   8  -7    4.74    2.28
 -10  -8   7   44.85    5.09
  10   8  -7   45.60    3.31
  -9  -8   7    2.15    4.04
  -9  -8   7    1.22    3.65
  -9   8   7    7.64    1.91
   9   8  -7    5.82    2.26
  -8  -8   7   39.64    2.91
  -8  -8   7   41.38    5.28
  -8  -8   7   40.10    4.77
  -8   8   7   34.28    2.69
   8   8  -7   41.38    3.10
  -7  -8   7    1.01    3.29
  -7  -8   7    1.71    1.94
  -7  -8   7   -1.80    3.52
  -7   8   7   -0.15    1.82
  -6  -8   7   47.60    3.45
  -6  -8   7   43.64    5.13
  -6  -8   7   36.55    4.40
   6  -8  -7   38.39    3.61
  -6   8   7   36.06    2.88
  -5  -8   7   17.51    4.31
  -5  -8   7   14.47    3.60
   5  -8  -7   18.39    2.93
  -5  -8   7   18.33    2.46
  -4  -8   7    4.52    3.21
   4  -8  -7    6.60    2.51
  -4  -8   7    5.78    2.14
  -4  -8   7    5.51    3.90
  -4   8   7    6.17    2.32
   3  -8  -7    4.34    2.35
   3  -8  -7    1.77    2.57
  -3  -8   7    1.25    2.21
  -3   8   7   -0.65    2.25
   2  -8  -7    1.21    2.80
   2  -8  -7    0.11    2.24
  -2  -8   7    0.23    2.29
  -2   8   7    4.23    2.07
  -2   8   7   -3.82    2.35
  -1  -8   7    0.83    2.58
   1  -8  -7    3.14    2.97
   1  -8  -7    0.16    2.20
  -1   8   7    1.47    2.02
  -1   8   7    1.82    2.71
   0  -8  -7    1.30    3.06
   0  -8  -7    2.71    2.29
   0   8   7    2.85    2.89
   0   8   7    2.99    2.04
  -1  -8  -7   58.19    4.41
  -1  -8  -7   61.65    5.24
   1   8   7   58.19    3.90
  -2  -8  -7   22.10    4.05
   2   8   7   13.45    2.46
  -3  -8  -7    3.35    3.58
   3   8   7    2.42    2.28
  -4  -8  -7   11.10    4.14
   4  -8   7   12.28    2.84
   4   8   7   13.04    2.57
  -5  -8  -7    1.26    4.12
   5  -8   7   -0.63    2.54
   5   8   7    4.54    2.55
   6  -8   7    2.63    2.75
  -6  -8  -7    0.80    4.37
   6   8   7    4.40    2.59
   7  -8   7   21.17    3.31
  -7  -8  -7   21.03    5.14
   7   8   7   22.06    3.18
   8  -8   7   32.09    3.60
  -8  -8  -7   23.25    5.46
   8   8   7   28.59    3.51
  -9  -8  -7    4.88    4.91
   9   8   7    5.67    3.10
 -10  -8  -7    4.28    5.22
  10   8   7    4.01    3.16
 -11  -8  -7    5.28    5.36
  11   8   7    1.63    3.33
 -12  -8  -7    7.46    5.73
 -13  -8  -7    3.16    5.88
 -18  -9   7   -4.92    5.27
 -17  -9   7   15.42    5.57
 -16  -9   7   -8.16    4.65
 -15  -9   7    5.68    4.64
 -14  -9   7   -1.05    4.12
 -13  -9   7    0.55    4.12
 -12  -9   7   -3.30    3.98
  12   9  -7   -0.37    2.12
 -11  -9   7   21.23    4.59
  11   9  -7   23.59    2.73
 -10  -9   7   54.12    5.51
  10   9  -7   58.59    4.28
  -9  -9   7   19.21    4.86
  -9  -9   7   22.40    4.45
   9   9  -7   24.90    2.57
  -8  -9   7    2.59    3.58
  -8  -9   7    5.75    4.12
  -8  -9   7    7.11    2.11
  -8   9   7    4.21    1.88
  -7  -9   7    5.03    3.60
  -7  -9   7    3.67    1.93
  -7  -9   7    4.86    3.91
  -7   9   7    2.36    1.96
   6  -9  -7   -0.78    2.63
  -6  -9   7   -3.72    3.71
  -6  -9   7    1.15    3.28
  -6  -9   7   -0.62    1.91
  -6   9   7   -0.58    1.66
  -5  -9   7    1.13    3.33
  -5  -9   7    1.41    3.85
   5  -9  -7    0.20    2.59
  -5  -9   7    0.17    1.99
  -5   9   7   -0.31    2.06
  -4  -9   7    7.18    2.18
  -4  -9   7    4.96    3.36
  -4  -9   7    1.60    3.88
   4  -9  -7    9.23    2.73
   4  -9  -7    2.75    2.52
  -4   9   7    7.23    2.52
  -3  -9   7    2.24    2.32
   3  -9  -7    6.31    2.51
  -3  -9   7    6.68    4.04
  -3  -9   7    6.57    3.30
   3  -9  -7    4.22    2.81
  -3   9   7    8.72    2.67
   2  -9  -7   21.17    2.93
  -2  -9   7   22.73    3.03
   2  -9  -7   21.07    3.37
  -2   9   7   19.85    3.29
  -1  -9   7   11.95    2.92
   1  -9  -7   11.69    2.48
   1  -9  -7   11.87    3.35
  -1   9   7   10.35    3.03
   0  -9  -7    0.78    3.19
   0  -9  -7   -2.23    2.25
   0   9   7   -0.46    1.98
   0   9   7   -1.68    2.87
  -1  -9  -7   16.44    2.65
  -1  -9  -7   16.78    3.90
   1   9   7   16.68    2.42
  -2  -9  -7   -2.25    3.48
   2   9   7    0.58    2.05
  -3  -9  -7   37.26    4.91
   3   9   7   40.79    3.06
   4  -9   7    7.72    2.76
  -4  -9  -7   10.66    4.38
   4   9   7    6.07    2.31
  -5  -9  -7   54.82    6.03
   5  -9   7   58.47    5.28
   5   9   7   61.03    4.36
   6  -9   7   11.30    2.92
  -6  -9  -7    3.81    4.52
   6   9   7    3.56    2.52
   7  -9   7    8.45    2.88
  -7  -9  -7    5.35    4.84
   7   9   7    2.73    2.55
  -8  -9  -7    4.40    4.89
   8   9   7    2.51    2.59
  -9  -9  -7    9.30    5.33
   9   9   7    7.44    2.88
 -10  -9  -7    9.00    5.57
 -11  -9  -7   -6.37    5.29
 -12  -9  -7    6.82    5.88
 -18 -10   7    1.68    5.69
 -17 -10   7   -2.87    5.14
 -16 -10   7  -12.83    4.72
 -15 -10   7    0.54    4.65
 -14 -10   7   -2.67    4.49
 -13 -10   7    3.30    4.31
 -12 -10   7    2.82    4.26
 -11 -10   7    3.81    4.11
  11  10  -7    6.20    1.84
 -10 -10   7   45.31    5.42
  -9 -10   7    6.93    3.95
  -8 -10   7   76.03    6.90
  -8 -10   7   64.43    5.98
  -8 -10   7   70.06    4.09
  -7 -10   7    2.83    3.68
  -7 -10   7    2.06    1.94
  -7 -10   7    4.62    4.26
  -7  10   7   -5.71    1.95
  -6 -10   7   32.81    2.81
  -6 -10   7   37.74    4.72
  -6 -10   7   33.83    5.34
   5 -10  -7   34.96    3.75
  -5 -10   7   37.82    5.23
  -5 -10   7   29.90    4.23
  -5 -10   7   36.45    3.04
  -5  10   7   36.12    3.23
   4 -10  -7   20.78    3.22
  -4 -10   7   18.95    4.64
  -4 -10   7    5.62    3.56
  -4 -10   7   12.87    2.47
   4 -10  -7   19.31    3.01
  -4  10   7   14.05    2.81
  -3 -10   7   34.08    5.24
   3 -10  -7   45.23    3.60
  -3 -10   7   39.94    3.38
  -3 -10   7   37.66    4.40
   3 -10  -7   40.46    4.05
  -3  10   7   29.88    3.52
   2 -10  -7    1.81    3.00
  -2 -10   7   -1.35    3.06
   2 -10  -7    3.76    2.57
  -2 -10   7    1.72    2.55
  -2  10   7   -3.51    2.70
   1 -10  -7    9.34    3.46
   1 -10  -7    9.44    2.52
  -1 -10   7    5.74    2.83
  -1  10   7    3.84    3.10
   0 -10  -7   10.63    3.74
   0 -10  -7    7.44    2.50
  -1 -10  -7   -3.26    3.45
  -1 -10  -7    1.33    2.33
   1  10   7   -0.54    1.92
  -2 -10  -7    1.94    3.73
   2  10   7    2.56    2.03
  -3 -10  -7    6.43    4.06
   3  10   7    2.73    2.06
   4 -10   7   12.03    2.87
  -4 -10  -7    8.59    4.56
   4  10   7    4.69    2.20
  -5 -10  -7   -3.30    4.21
   5 -10   7    3.48    2.63
   5  10   7   -2.40    2.01
  -6 -10  -7    5.07    4.69
   6 -10   7    3.27    2.59
   6  10   7    0.97    2.14
  -7 -10  -7   10.33    5.07
   7  10   7    9.57    2.49
  -8 -10  -7    1.55    4.92
  -9 -10  -7   12.67    5.57
 -10 -10  -7    1.00    5.49
 -11 -10  -7   -0.26    5.53
 -12 -10  -7   13.67    6.34
 -17 -11   7   -3.42    5.45
 -16 -11   7   -0.06    5.21
 -15 -11   7  -12.26    4.71
 -14 -11   7    8.63    5.04
 -13 -11   7    0.70    4.45
 -12 -11   7    1.16    4.31
 -11 -11   7    6.92    4.34
 -10 -11   7    5.66    4.18
  -9 -11   7   39.30    5.27
  -8 -11   7   -8.62    4.12
  -8 -11   7   -3.66    3.52
  -8 -11   7    2.15    1.95
  -7 -11   7    4.83    3.88
  -7 -11   7   -0.04    4.27
  -7  11   7   -2.01    1.97
  -6 -11   7   -3.71    3.98
  -6 -11   7    4.67    3.85
  -6 -11   7   -2.49    1.96
   5 -11  -7   14.21    3.30
  -5 -11   7   13.14    4.03
  -5 -11   7   20.65    4.94
  -5 -11   7   10.91    2.42
  -5  11   7    9.39    2.66
   4 -11  -7    4.50    2.89
  -4 -11   7   -1.33    3.43
  -4 -11   7    0.72    2.29
  -4 -11   7    2.48    4.25
   4 -11  -7    5.52    2.78
  -4  11   7    2.83    2.69
   3 -11  -7    2.43    2.59
  -3 -11   7   -3.17    3.88
  -3 -11   7   -2.52    3.22
  -3 -11   7   -0.45    2.37
   3 -11  -7   -0.13    2.99
  -3  11   7   -3.19    2.67
  -2 -11   7   -1.70    3.06
  -2 -11   7   -1.33    3.95
   2 -11  -7    2.71    2.61
  -2 -11   7   -2.55    2.40
   2 -11  -7    0.86    3.11
  -2  11   7   -5.04    2.21
  -2  11   7    1.05    2.98
  -1 -11   7   21.18    3.70
   1 -11  -7   25.75    2.98
   1 -11  -7   25.16    4.08
  -1 -11   7   18.06    3.30
   0 -11  -7    2.75    2.42
   0 -11  -7   -0.20    3.54
   0 -11   7    6.78    3.20
  -1 -11  -7    9.25    2.45
  -1 -11  -7    7.14    3.86
  -2 -11  -7   -4.58    3.69
  -3 -11  -7   16.30    4.56
   3  11   7   19.65    2.24
  -4 -11  -7   -1.11    4.26
   4 -11   7    1.42    2.58
   4  11   7   -0.14    1.85
  -5 -11  -7    1.94    4.41
   5  11   7   -2.56    1.79
  -6 -11  -7    1.00    4.65
  -7 -11  -7   -0.66    4.76
  -8 -11  -7    9.66    5.45
  -9 -11  -7    2.77    5.38
 -10 -11  -7   11.67    5.91
 -11 -11  -7    8.72    6.14
 -16 -12   7   -6.54    5.23
 -15 -12   7    1.16    5.27
 -14 -12   7   -8.56    4.75
 -13 -12   7   19.16    5.28
 -12 -12   7    0.02    4.41
 -11 -12   7   24.17    5.17
 -10 -12   7   14.25    4.61
  -9 -12   7    6.18    4.15
  -8 -12   7   -1.82    4.44
  -8 -12   7   10.54    4.22
  -8 -12   7   10.83    2.03
  -7 -12   7   -1.20    4.28
  -7 -12   7    0.17    1.82
  -7 -12   7   -0.72    3.65
  -7  12   7   -1.25    1.92
  -6 -12   7   66.45    5.87
  -6 -12   7   66.23    6.76
  -6 -12   7   60.06    3.84
  -5 -12   7    7.77    4.57
  -5 -12   7    1.14    2.27
  -5 -12   7    2.48    3.64
  -5  12   7    3.60    2.59
  -4 -12   7   15.63    4.71
  -4 -12   7   16.95    2.73
   4 -12  -7   15.33    3.32
  -4 -12   7   17.42    4.16
   4 -12  -7   11.93    3.13
  -4  12   7   16.45    3.12
  -3 -12   7   53.48    5.05
  -3 -12   7   54.70    6.01
   3 -12  -7   55.80    4.05
   3 -12  -7   46.62    4.51
  -3 -12   7   52.40    3.90
  -3  12   7   44.79    4.24
  -2 -12   7    2.96    2.67
  -2 -12   7    1.32    4.20
   2 -12  -7   -0.46    2.60
  -2 -12   7   -7.34    2.91
   2 -12  -7   -1.64    3.21
  -2  12   7   -7.58    3.01
  -2  12   7    2.60    2.38
   1 -12  -7   18.14    2.86
   1 -12  -7   22.51    4.14
  -1 -12   7   25.71    3.94
  -1 -12   7   20.83    4.84
  -1 -12   7   19.13    3.40
  -1  12   7   21.34    3.11
   0 -12  -7    5.42    2.50
   0 -12  -7    6.49    3.89
   0 -12   7    8.49    3.32
   0  12   7    2.84    3.11
  -1 -12  -7    4.45    3.81
  -1 -12  -7    1.86    2.24
   1 -12   7    6.00    3.18
  -2 -12  -7   14.63    4.47
   2 -12   7   27.33    3.70
  -3 -12  -7   -0.89    4.23
  -4 -12  -7    3.97    4.44
  -5 -12  -7    7.95    4.79
  -6 -12  -7    9.18    5.17
  -7 -12  -7    2.88    5.10
  -8 -12  -7   -2.86    5.19
  -9 -12  -7    8.11    5.80
 -10 -12  -7    2.71    5.85
 -15 -13   7   -8.99    5.07
 -14 -13   7   -9.08    5.07
 -13 -13   7   -8.91    4.56
 -12 -13   7   -3.42    4.52
 -11 -13   7   -0.67    4.39
 -10 -13   7    2.76    4.49
  -9 -13   7   24.20    5.00
  -8 -13   7   -2.12    3.87
  -7 -13   7   33.21    5.74
  -7 -13   7   27.16    4.89
  -7 -13   7   32.41    2.49
  -6 -13   7   -6.61    1.79
  -6 -13   7    0.62    4.26
  -6 -13   7    4.12    3.88
  -5 -13   7    5.10    4.40
  -5 -13   7    2.11    2.31
  -5 -13   7    1.26    3.77
  -4 -13   7    3.59    2.34
  -4 -13   7    4.91    3.70
   4 -13  -7    8.05    2.93
   4 -13  -7    6.43    3.23
  -4 -13   7    3.79    4.24
  -4  13   7    1.08    2.79
   3 -13  -7    4.98    3.24
   3 -13  -7   -1.64    2.69
  -3 -13   7   -2.12    3.41
  -3 -13   7   -5.31    3.83
  -3 -13   7    1.18    2.53
  -3  13   7   -2.11    2.85
  -2 -13   7    3.48    4.16
  -2 -13   7    1.75    2.70
  -2 -13   7   11.16    3.56
   2 -13  -7    9.68    2.87
   2 -13  -7    3.58    3.43
  -1 -13   7    3.73    4.02
  -1 -13   7    5.88    3.40
   1 -13  -7    9.53    3.86
  -1 -13   7   11.42    3.19
   0 -13   7    9.94    4.26
   0 -13  -7    5.59    3.95
   0 -13   7    2.21    3.19
  -1 -13  -7    5.44    3.88
   1 -13   7    2.75    3.15
   2 -13   7   -0.03    3.04
  -2 -13  -7    0.19    4.01
  -3 -13  -7    1.02    4.19
   3 -13   7    0.96    2.99
  -4 -13  -7    0.60    4.47
   4 -13   7    7.86    3.09
  -5 -13  -7   -2.75    4.56
  -6 -13  -7    4.57    5.08
  -7 -13  -7    2.32    5.16
  -8 -13  -7   10.50    5.68
  -9 -13  -7    3.83    5.87
 -14 -14   7  -13.34    4.90
 -13 -14   7   -8.55    5.19
 -12 -14   7   -4.83    4.75
 -11 -14   7   11.92    5.07
 -10 -14   7    0.44    4.44
  -9 -14   7   -0.80    4.21
  -8 -14   7   -3.50    3.98
  -7 -14   7    0.69    4.03
  -7 -14   7    0.97    4.54
  -6 -14   7    7.74    4.66
  -6 -14   7    5.41    3.95
  -5 -14   7   -0.91    2.13
  -5 -14   7   -4.22    3.60
  -5 -14   7    4.15    4.47
   4 -14  -7    2.35    2.93
  -4 -14   7    0.37    3.55
  -4 -14   7   -2.17    2.29
  -4 -14   7    2.76    4.10
  -3 -14   7   16.74    3.97
  -3 -14   7    9.20    4.21
   3 -14  -7   18.40    3.71
  -3 -14   7    8.74    2.85
   2 -14  -7    0.66    3.47
  -2 -14   7   -4.56    3.13
  -2 -14   7   -1.70    2.81
  -2 -14   7    0.33    3.89
  -1 -14   7   12.40    3.64
  -1 -14   7   23.58    4.85
  -1 -14   7   18.50    3.40
   1 -14  -7   16.17    4.09
   0 -14   7    0.51    2.96
   0 -14  -7    8.37    4.09
   0 -14   7    1.96    3.35
   0 -14   7   11.76    4.41
  -1 -14  -7   19.69    4.75
   1 -14   7   21.32    4.75
   1 -14   7   16.06    3.71
  -2 -14  -7   41.04    5.44
   2 -14   7   38.93    4.28
   3 -14   7    2.73    3.18
  -3 -14  -7    4.83    4.51
  -4 -14  -7   10.01    4.90
  -5 -14  -7    7.09    4.99
  -6 -14  -7   20.87    5.72
  -7 -14  -7   26.45    6.15
  -8 -14  -7   -9.31    5.12
 -12 -15   7  -15.55    4.84
 -11 -15   7   -9.38    4.53
 -10 -15   7   -0.43    4.66
  -9 -15   7    2.98    4.43
  -8 -15   7    0.62    4.18
  -7 -15   7    1.15    4.15
  -6 -15   7    7.11    4.31
  -6 -15   7   17.01    5.19
  -5 -15   7    1.76    3.89
  -5 -15   7    9.36    4.53
   4 -15  -7    2.15    2.95
  -4 -15   7    0.61    4.10
  -4 -15   7   -2.90    3.52
   3 -15  -7   10.84    3.63
  -3 -15   7   12.04    3.75
  -3 -15   7    8.76    4.48
  -3 -15   7    5.13    2.70
  -2 -15   7    5.21    3.00
  -2 -15   7   -0.48    3.84
  -2 -15   7    0.55    3.31
   2 -15  -7    2.80    3.57
  -1 -15   7   -1.94    3.80
   1 -15  -7    4.15    3.77
  -1 -15   7   -0.47    2.97
  -1 -15   7   -7.58    3.17
   0 -15   7    7.19    4.29
   0 -15   7    3.16    3.13
   0 -15  -7    5.90    4.22
   0 -15   7   -1.19    3.31
   1 -15   7    2.84    4.02
   1 -15   7   -7.54    3.14
  -1 -15  -7    2.63    4.23
   2 -15   7    2.78    3.96
  -2 -15  -7   -2.24    4.18
  -3 -15  -7    8.27    4.70
  -4 -15  -7    9.61    4.97
  -5 -15  -7   -2.33    4.73
  -6 -15  -7    4.37    5.31
 -10 -16   7   -7.87    4.60
  -9 -16   7   -3.62    4.57
  -8 -16   7   -0.75    4.54
  -7 -16   7   -2.75    4.02
  -6 -16   7    3.99    4.28
  -5 -16   7    4.27    4.45
  -5 -16   7    4.07    4.20
  -4 -16   7   -1.35    3.77
  -4 -16   7   -1.99    4.01
  -3 -16   7    3.57    3.70
  -3 -16   7   -2.11    4.07
  -2 -16   7   -9.35    3.76
   2 -16  -7    4.72    3.76
  -2 -16   7   -2.63    3.34
  -1 -16   7   13.80    4.70
   1 -16  -7   14.30    4.30
  -1 -16   7    9.39    3.74
   0 -16   7   10.28    3.58
   0 -16   7    3.65    4.27
   0 -16   7    5.71    3.65
   0 -16  -7    7.95    4.38
  -1 -16  -7    4.93    4.33
   1 -16   7    2.22    4.13
  -2 -16  -7    1.84    4.36
   2 -16   7    8.97    4.51
  -3 -16  -7    3.40    4.56
   3 -16   7    8.35    4.39
  -4 -16  -7    3.73    5.03
  -8 -17   7   -6.25    4.48
  -7 -17   7    0.97    4.48
  -6 -17   7   -5.75    4.13
  -5 -17   7   -3.10    4.03
  -4 -17   7    1.64    4.37
  -4 -17   7    3.62    3.94
  -3 -17   7   -0.74    4.09
  -3 -17   7   -1.79    3.74
  -2 -17   7   -0.24    3.66
  -2 -17   7   -6.10    4.15
  -1 -17   7    1.38    4.38
   0 -17   7    2.23    4.13
   0 -17  -7    5.42    4.50
   1 -17   7   -0.02    4.23
  -1 -17  -7    7.73    4.64
  -2 -17  -7    3.67    4.61
   2 -17   7    7.74    4.71
 -21   0   8  -11.38    4.61
 -20   0   8    9.08    4.82
 -19   0   8   -1.53    4.23
 -18   0   8   23.73    4.66
 -17   0   8    2.75    3.86
 -16   0   8    0.41    3.56
 -15   0   8   56.51    5.18
 -14   0   8   83.47    6.19
 -13   0   8   53.94    4.84
 -12   0   8   -0.87    2.99
 -11   0   8   10.35    3.37
  10   0  -8   33.87    3.38
 -10   0   8   33.11    4.06
   9   0  -8    3.98    2.39
  -9   0   8    4.56    2.92
  -8   0   8   42.18    3.34
  -8   0   8   45.34    4.18
   8   0  -8   47.93    3.62
  -7   0   8  118.83    6.87
   7   0  -8  114.15    5.56
  -7   0   8  124.44    5.55
  -6   0   8   73.96    4.62
   6   0  -8   81.11    4.86
   5   0  -8   11.59    2.24
  -5   0   8   11.90    2.61
  -4   0   8   16.34    2.69
   3   0  -8    0.31    1.50
  -3   0   8    2.19    2.38
  -2   0   8   16.55    2.79
   2   0  -8   27.74    3.08
  -1   0   8   98.54    5.54
   1   0  -8   82.91    5.39
  -1   0   8   65.62    4.84
   0   0   8   97.00    6.51
   0   0   8   95.65    5.61
   1   0   8   86.76    6.28
   1   0   8   91.35    5.95
   2   0   8    5.61    2.82
   2   0   8    2.27    2.83
  -3   0  -8   -1.86    3.28
   3   0   8    4.87    2.80
   3   0   8    2.23    2.83
  -4   0  -8  101.90    7.37
   4   0   8  100.22    6.88
  -5   0  -8    7.13    3.97
  -6   0  -8   46.33    5.26
  -7   0  -8  131.72    8.78
  -8   0  -8   -2.29    4.45
  -9   0  -8   15.97    5.06
 -10   0  -8   11.73    5.11
 -11   0  -8   18.45    5.43
 -12   0  -8    6.62    5.35
 -13   0  -8   12.66    5.59
 -14   0  -8   17.03    6.12
 -21  -1   8  -11.56    4.64
 -21   1   8  -15.75    4.28
 -20  -1   8   -7.43    4.43
 -20   1   8  -16.41    4.13
 -19  -1   8   -6.05    4.24
 -19   1   8   -4.38    3.97
 -18  -1   8   -5.07    4.16
 -18   1   8   -0.66    3.76
 -17  -1   8   -4.75    3.85
 -17   1   8   -2.68    3.59
 -16  -1   8   -0.53    3.69
 -16   1   8   -2.92    3.33
 -15  -1   8    3.00    3.65
 -15   1   8   -0.96    3.36
 -14  -1   8   -3.65    3.33
 -14   1   8   -1.06    3.15
 -13  -1   8    6.17    3.53
 -13   1   8    6.47    3.34
 -12  -1   8    2.46    3.29
 -12   1   8    2.46    3.07
 -11  -1   8    7.51    3.23
  11   1  -8    2.66    2.55
 -11   1   8    3.49    2.94
  10  -1  -8    3.35    2.41
 -10  -1   8    2.35    3.15
 -10  -1   8    2.16    3.06
 -10   1   8    1.37    2.97
  10   1  -8    3.77    2.45
   9  -1  -8    0.10    2.28
  -9  -1   8   -0.22    2.99
  -9  -1   8    1.97    2.25
   9   1  -8    1.01    2.33
  -9   1   8    0.49    2.67
   8  -1  -8   20.13    2.83
  -8  -1   8   16.90    3.53
  -8  -1   8   21.98    2.79
   8   1  -8   28.22    2.96
  -8   1   8   23.81    3.40
  -8   1   8   28.11    2.99
   7  -1  -8    0.85    2.06
  -7  -1   8   -3.01    3.05
  -7  -1   8    0.02    2.21
   7   1  -8   -0.09    2.19
  -7   1   8    1.28    2.20
  -7   1   8   -1.00    2.83
   6  -1  -8    0.54    0.39
  -6  -1   8    1.72    2.30
  -6   1   8    3.54    2.19
   6   1  -8    3.49    2.25
  -5  -1   8    9.71    2.43
   5  -1  -8    3.30    1.76
  -5   1   8    4.04    2.34
   5   1  -8    6.96    2.34
  -4  -1   8   -0.31    2.23
   4  -1  -8   -0.93    2.16
   4   1  -8   -2.07    2.01
  -4   1   8    4.14    2.30
  -3  -1   8   28.15    3.09
   3  -1  -8   29.52    3.11
  -3   1   8   33.35    3.20
   3   1  -8   35.86    3.05
   2  -1  -8   22.09    2.99
  -2  -1   8   25.68    3.04
  -2   1   8   22.45    3.05
  -2   1   8   25.28    3.20
   1  -1  -8   92.76    5.30
  -1  -1   8   96.64    5.26
  -1   1   8   74.94    5.00
  -1   1   8   92.17    5.39
   0  -1   8  119.28    6.97
   0   1   8  129.24    6.40
   1  -1   8  136.20    6.53
   1  -1   8  131.94    7.26
   1   1   8  120.73    6.60
   1   1   8  136.86    7.43
   2  -1   8    3.18    2.78
  -2  -1  -8    2.83    3.22
   2  -1   8    2.96    2.79
   2   1   8    3.79    2.78
   2   1   8    2.83    2.73
   3  -1   8   13.80    3.12
  -3  -1  -8    3.61    3.49
   3   1   8   10.44    3.17
   3   1   8    5.71    3.03
  -4  -1  -8   -1.41    3.39
   4  -1   8   -1.04    2.79
  -5  -1  -8    3.05    3.73
  -5   1  -8    3.97    3.73
  -6  -1  -8   14.09    4.44
  -6   1  -8   15.03    4.35
  -7  -1  -8    0.66    4.22
  -7   1  -8   -2.43    4.06
  -8  -1  -8   -0.37    4.42
  -8   1  -8   -0.14    4.33
  -9  -1  -8   -0.19    4.52
  -9   1  -8    2.32    4.53
 -10  -1  -8    4.94    4.98
 -10   1  -8    8.42    4.84
 -11  -1  -8    2.93    4.97
 -11   1  -8    0.50    4.74
 -12  -1  -8   -1.68    5.04
 -12   1  -8    6.22    5.10
 -13  -1  -8    9.81    5.66
 -13   1  -8    7.93    5.22
 -14  -1  -8    3.82    5.81
 -14   1  -8    2.23    5.37
 -21  -2   8   -3.14    5.33
 -20  -2   8  -12.95    4.45
 -20   2   8   -3.29    4.14
 -19  -2   8    0.31    4.45
 -19   2   8   -5.66    3.90
 -18  -2   8    9.57    4.53
 -18   2   8    1.06    3.74
 -17  -2   8    4.80    4.12
 -17   2   8    6.49    3.63
 -16  -2   8   -1.43    3.75
 -16   2   8   -0.78    3.25
 -15  -2   8    1.95    3.72
 -15   2   8   -2.99    3.10
 -14  -2   8    8.84    3.79
 -14   2   8    9.70    3.39
 -13  -2   8   17.13    4.06
 -13   2   8   14.97    3.44
 -12  -2   8    3.24    3.47
 -12   2   8    2.67    3.02
 -11  -2   8   46.37    4.55
  11  -2  -8   50.55    4.81
 -11   2   8   42.37    4.12
  11   2  -8   47.83    3.78
 -10  -2   8    4.40    3.20
 -10  -2   8    3.21    3.28
  10   2  -8    3.00    2.42
  -9  -2   8    2.97    3.26
   9  -2  -8    4.81    2.18
  -9  -2   8   -0.58    2.13
  -9  -2   8    1.63    3.08
   9   2  -8    3.96    2.35
  -9   2   8    3.08    2.66
  -8  -2   8   15.47    3.64
  -8  -2   8   15.34    2.65
  -8   2   8   15.12    2.99
   8   2  -8   15.01    2.59
   7  -2  -8    0.47    1.86
  -7  -2   8    2.13    3.28
  -7  -2   8    0.37    2.18
  -7   2   8    0.49    2.68
  -7   2   8    1.21    2.26
   7   2  -8    4.60    2.28
   6  -2  -8   57.81    4.50
  -6  -2   8   64.78    4.56
  -6  -2   8   61.59    5.22
   6   2  -8   59.26    4.49
  -6   2   8   55.08    4.24
  -5  -2   8    7.47    2.46
   5  -2  -8    2.56    2.30
   5   2  -8    5.01    2.30
  -5   2   8    6.20    2.41
  -4  -2   8   17.18    2.85
   4  -2  -8   21.01    2.83
  -4   2   8   26.88    2.98
   4   2  -8   22.12    2.87
   3  -2  -8  272.31    9.48
  -3   2   8  278.91   10.76
  -3   2   8  288.61    9.42
   3   2  -8  283.82    9.73
   2  -2  -8   45.70    3.61
  -2  -2   8   46.51    3.70
  -2   2   8   44.40    3.62
  -2   2   8   44.02    3.96
   2   2  -8   49.28    3.63
   1  -2  -8   85.94    5.46
  -1  -2   8   83.77    5.22
  -1   2   8   84.64    6.01
  -1   2   8   80.45    4.91
   0  -2   8   -1.51    2.61
   0   2   8   -2.13    2.42
   0   2   8    4.46    2.56
   1  -2   8   15.71    3.07
   1  -2   8   18.59    3.14
  -1  -2  -8   13.31    3.56
   1   2   8   12.76    3.01
   2  -2   8    9.59    2.89
  -2  -2  -8    8.76    3.39
   2   2   8   18.11    3.17
   2   2   8   12.87    3.10
  -3  -2  -8   -0.86    3.33
   3  -2   8   -0.10    2.63
   3   2   8   -1.06    2.74
   3   2   8    0.87    2.71
   4  -2   8    7.58    2.88
  -4  -2  -8    9.54    3.84
   4   2   8   10.62    3.17
  -5  -2  -8   33.33    4.80
  -6  -2  -8    7.87    4.32
  -7  -2  -8   60.90    6.04
  -8  -2  -8   -0.19    4.49
  -8   2  -8    2.98    4.39
  -9  -2  -8   40.11    5.92
  -9   2  -8   46.95    6.00
 -10  -2  -8   -0.56    4.78
 -10   2  -8   -2.59    4.49
 -11  -2  -8   -5.43    4.78
 -11   2  -8    2.13    4.71
 -12  -2  -8    5.98    5.17
 -12   2  -8   11.27    5.06
 -13  -2  -8   -1.33    5.38
 -13   2  -8   -1.96    5.07
 -14  -2  -8   13.04    6.07
 -14   2  -8   12.86    5.80
 -21  -3   8  -17.40    5.14
 -20  -3   8   -7.32    4.88
 -19  -3   8    0.56    4.51
 -19   3   8  -11.28    3.62
 -18  -3   8   -4.76    4.32
 -18   3   8   -1.24    3.54
 -17  -3   8    0.72    4.17
 -17   3   8   -7.19    3.23
 -16  -3   8    2.02    4.00
 -16   3   8    4.30    3.26
 -15  -3   8   -3.71    3.61
 -15   3   8    3.74    3.11
 -14  -3   8    2.57    3.68
 -14   3   8    3.90    3.11
 -13  -3   8    9.26    3.83
 -13   3   8    7.50    3.18
  12  -3  -8   39.37    4.63
 -12  -3   8   41.66    4.75
 -12   3   8   41.13    3.97
  12   3  -8   41.42    3.79
  11  -3  -8    3.78    3.27
 -11  -3   8    3.95    3.42
  11   3  -8    0.95    2.45
 -11   3   8    2.51    2.84
 -10  -3   8   19.56    3.98
 -10  -3   8   17.75    3.85
  10   3  -8   16.01    2.84
  -9  -3   8    5.05    2.27
  -9  -3   8    4.05    3.37
  -9  -3   8    5.77    3.32
   9  -3  -8    3.24    2.09
   9   3  -8    4.77    2.31
  -8  -3   8   32.39    4.27
   8  -3  -8   23.73    3.03
  -8  -3   8   25.52    2.83
   8   3  -8   24.59    2.87
  -8   3   8   26.36    3.16
  -7  -3   8  139.09    5.78
   7  -3  -8  135.75    6.49
  -7  -3   8  119.84    7.42
  -7   3   8  123.68    6.26
   7   3  -8  136.46    6.10
  -7   3   8  134.59    5.89
  -6  -3   8   24.16    4.11
  -6  -3   8   21.63    2.86
   6  -3  -8   21.57    2.85
   6   3  -8   23.25    2.83
  -6   3   8   22.60    2.89
   5  -3  -8    1.80    2.24
  -5  -3   8    0.61    2.29
   5   3  -8    3.80    2.36
  -5   3   8    5.59    2.35
  -4  -3   8   47.05    3.61
   4  -3  -8   44.45    3.49
  -4   3   8   48.19    3.58
   4   3  -8   52.37    3.71
  -4   3   8   46.80    3.88
   3  -3  -8    1.19    2.27
  -3  -3   8    1.95    2.38
   3   3  -8    2.48    2.49
  -3   3   8    2.88    2.59
  -3   3   8    1.63    2.35
  -2  -3   8    6.02    2.59
   2  -3  -8    0.66    2.35
  -2   3   8   -2.03    2.26
  -2   3   8   -1.89    2.53
   1  -3  -8   64.44    4.97
  -1  -3   8   65.36    4.97
  -1   3   8   62.17    4.87
  -1   3   8   70.95    5.90
   0  -3   8    3.06    2.74
   0  -3  -8    1.43    3.00
   0  -3  -8    5.25    2.58
   0   3   8    0.17    2.49
   0   3   8    1.51    2.65
   1  -3   8   18.99    3.21
   1  -3   8   20.35    3.19
  -1  -3  -8   13.80    3.56
   1   3   8   13.80    2.94
   1   3   8   16.04    3.20
   2  -3   8   -1.37    2.64
  -2  -3  -8   -6.61    3.04
   2   3   8    0.36    0.89
   2   3   8    3.95    2.72
  -3  -3  -8   -0.06    3.30
   3  -3   8    2.38    2.69
   3   3   8    1.58    2.82
   4  -3   8    0.53    2.73
  -4  -3  -8    0.77    3.51
   4   3   8    3.43    2.86
   5  -3   8   -0.45    2.80
  -5  -3  -8   -2.00    3.67
   5   3   8    1.13    3.01
  -6  -3  -8    2.22    4.11
   6   3   8    3.55    3.23
  -7  -3  -8    1.67    4.28
  -8  -3  -8   -0.33    4.46
  -9  -3  -8    1.43    4.72
 -10  -3  -8    4.60    4.95
 -11  -3  -8    5.69    5.19
 -12  -3  -8    3.84    5.36
 -13  -3  -8   16.40    6.15
 -14  -3  -8   13.25    6.36
 -20  -4   8   -9.01    4.85
 -19  -4   8    3.26    4.84
 -18  -4   8   -0.89    4.48
 -18   4   8    0.30    3.53
 -17  -4   8    1.26    4.29
 -17   4   8    0.91    3.13
 -16  -4   8   12.10    4.54
 -16   4   8   25.72    3.64
 -15  -4   8    8.21    4.15
 -15   4   8   12.94    3.26
 -14  -4   8   12.90    4.30
 -14   4   8   14.94    3.19
  13  -4  -8    6.35    3.67
 -13  -4   8    0.24    3.69
 -13   4   8    0.77    2.75
 -12  -4   8    3.74    3.66
  12  -4  -8    2.88    3.31
  12   4  -8    4.79    2.72
 -12   4   8   -1.04    2.69
 -11  -4   8   28.29    4.21
 -11   4   8   22.05    3.29
  11   4  -8   26.65    3.17
 -10  -4   8   23.74    4.28
 -10  -4   8   29.02    4.28
  10   4  -8   31.88    3.11
  -9  -4   8    0.83    3.33
  -9  -4   8    6.81    2.26
  -9  -4   8    4.40    3.53
   9   4  -8    5.44    2.34
  -8  -4   8   39.54    4.71
  -8  -4   8   47.73    4.61
   8  -4  -8   30.57    3.38
  -8  -4   8   43.92    3.27
  -8   4   8   40.77    3.21
   8   4  -8   47.97    3.49
   7  -4  -8   11.11    2.63
  -7  -4   8   10.27    2.46
  -7  -4   8    7.03    3.54
   7   4  -8   14.54    2.45
  -7   4   8    9.97    2.44
   6  -4  -8   25.82    3.07
  -6  -4   8   20.63    2.69
  -6  -4   8   18.08    4.03
  -6   4   8   22.41    2.81
   6   4  -8   23.57    2.86
  -5  -4   8   39.78    3.35
   5  -4  -8   40.76    3.38
   5   4  -8   48.12    3.60
  -5   4   8   42.38    3.31
  -5   4   8   39.73    3.59
  -4  -4   8  145.43    6.07
   4  -4  -8  140.01    6.17
   4   4  -8  148.10    6.57
  -4   4   8  143.06    6.16
  -4   4   8  152.15    7.26
   3  -4  -8   53.99    4.28
  -3  -4   8   66.49    4.64
  -3   4   8   60.39    4.28
  -3   4   8   62.79    5.61
  -2  -4   8    0.22    2.56
   2  -4  -8    1.72    2.34
  -2   4   8   -0.06    2.65
  -2   4   8    4.84    2.38
  -1  -4   8   17.57    3.06
   1  -4  -8   19.37    2.87
   1  -4  -8   18.07    3.46
  -1   4   8   15.39    3.13
  -1   4   8   12.62    2.76
   0  -4  -8    3.73    2.51
   0  -4   8    2.68    2.76
   0  -4  -8   -0.65    2.94
   0   4   8   -1.23    2.37
   0   4   8    2.58    2.89
  -1  -4  -8   73.92    6.58
   1   4   8   78.02    6.30
   1   4   8   72.26    4.97
   2  -4   8   62.07    5.18
  -2  -4  -8   58.33    5.19
   2   4   8   52.64    4.01
   2   4   8   51.92    4.38
   3  -4   8   14.11    2.97
  -3  -4  -8    9.84    3.57
   3   4   8   12.58    3.04
   4  -4   8   17.37    3.20
  -4  -4  -8   18.09    4.17
   4   4   8   15.76    3.31
  -5  -4  -8    6.44    4.02
   5  -4   8    8.51    2.98
   5   4   8    7.40    3.24
  -6  -4  -8   30.48    5.00
   6   4   8   30.29    4.12
  -7  -4  -8   11.13    4.76
   7   4   8   18.22    3.82
  -8  -4  -8   16.90    5.03
  -9  -4  -8   10.63    4.98
 -10  -4  -8    8.80    5.08
 -11  -4  -8    7.76    5.32
 -12  -4  -8    3.99    5.53
 -13  -4  -8    2.90    5.65
 -14  -4  -8   10.16    6.19
 -20  -5   8    0.83    5.15
 -19  -5   8   -6.70    4.60
 -18  -5   8    1.00    4.80
 -17  -5   8   -2.68    4.25
 -17   5   8   -4.22    2.99
 -16  -5   8    2.75    4.26
 -16   5   8    4.73    3.09
 -15  -5   8    2.85    4.11
 -15   5   8   -2.95    2.63
 -14  -5   8   12.87    4.27
 -14   5   8   16.80    3.06
  13  -5  -8    4.13    3.54
 -13  -5   8    9.76    4.09
  13   5  -8    6.37    2.95
 -13   5   8   10.10    2.81
  12  -5  -8   14.69    3.49
 -12  -5   8   11.24    4.01
 -12   5   8    5.09    2.73
  12   5  -8   13.01    2.86
 -11  -5   8    0.09    3.59
  11   5  -8    2.34    2.42
 -11   5   8   -1.05    2.61
 -10  -5   8   -1.47    3.42
 -10  -5   8   -1.37    3.14
  10   5  -8    2.47    2.28
  -9  -5   8   -1.53    3.16
  -9  -5   8    5.20    3.60
  -9  -5   8    4.66    2.27
   9   5  -8    3.06    2.36
  -8  -5   8   -0.61    2.06
  -8  -5   8    1.68    3.17
  -8  -5   8    1.93    3.29
   8  -5  -8    2.44    2.46
   8   5  -8   -1.10    2.04
  -7  -5   8    8.31    2.35
   7  -5  -8   13.24    2.79
  -7  -5   8   13.84    3.78
  -7   5   8   10.54    2.21
   7   5  -8   14.26    2.55
  -6  -5   8   -0.11    2.11
  -6  -5   8    2.47    3.38
   6  -5  -8   -4.44    2.17
   6   5  -8    1.44    2.33
  -6   5   8   -0.71    2.10
  -6   5   8   -1.06    2.24
   5  -5  -8    3.33    2.38
  -5  -5   8    0.57    2.33
   5   5  -8    4.63    2.47
  -5   5   8    5.99    2.52
  -5   5   8    2.44    2.23
  -4  -5   8   -1.91    2.24
   4  -5  -8    0.89    2.27
  -4   5   8    2.35    2.53
  -4   5   8    4.41    2.35
   3  -5  -8   -3.52    2.19
  -3  -5   8   -1.41    2.38
  -3   5   8    2.94    2.26
  -3   5   8   -1.78    2.56
  -2  -5   8    2.73    2.61
   2  -5  -8    0.45    2.78
   2  -5  -8    1.22    2.30
  -2   5   8   -1.91    2.58
  -2   5   8    2.37    2.36
   1  -5  -8   15.83    2.72
   1  -5  -8   11.21    3.24
  -1  -5   8   13.35    3.02
  -1   5   8   10.88    3.09
  -1   5   8   12.68    2.55
   0  -5  -8   -0.69    3.05
   0  -5  -8   -1.60    2.38
   0  -5   8    4.37    2.72
   0   5   8   -1.49    2.27
   0   5   8    2.76    2.82
  -1  -5  -8   22.12    3.91
   1   5   8   22.31    2.99
   1   5   8   21.89    3.48
   2  -5   8    3.90    2.72
  -2  -5  -8    0.25    3.21
   2   5   8   -0.47    2.45
  -3  -5  -8    5.86    3.59
   3  -5   8    1.70    2.70
   3   5   8    4.72    2.73
  -4  -5  -8    5.25    3.73
   4  -5   8    4.67    2.76
   4   5   8    2.35    2.93
   5  -5   8   13.29    3.25
  -5  -5  -8   16.40    4.40
   5   5   8   13.72    3.40
  -6  -5  -8    1.49    4.09
   6   5   8    3.78    3.26
  -7  -5  -8    1.94    4.48
   7   5   8    3.38    3.42
  -8  -5  -8   10.05    4.99
   8   5   8    6.76    3.73
  -9  -5  -8    7.39    4.94
   9   5   8    2.94    3.59
 -10  -5  -8    3.99    5.04
  10   5   8   -0.02    3.54
 -11  -5  -8   13.10    5.73
 -12  -5  -8    5.81    5.69
 -13  -5  -8    3.39    5.91
 -20  -6   8  -12.48    5.10
 -19  -6   8   -0.73    4.94
 -18  -6   8    7.27    5.21
 -17  -6   8    1.00    4.48
 -16  -6   8    4.25    4.28
 -16   6   8   -5.29    2.64
 -15  -6   8   21.91    4.86
 -15   6   8   14.20    2.89
  14  -6  -8   27.99    4.30
 -14  -6   8   28.22    4.88
 -14   6   8   24.83    3.02
  13  -6  -8   70.62    5.61
 -13  -6   8   57.14    5.85
 -13   6   8   58.17    4.53
  13   6  -8   58.15    4.23
 -12  -6   8   11.48    4.16
  12   6  -8   11.65    2.89
 -12   6   8   15.32    2.74
 -11  -6   8   45.31    5.18
 -11   6   8   49.61    4.33
  11   6  -8   44.76    3.73
 -10  -6   8   10.23    3.95
 -10  -6   8   18.80    4.35
  10   6  -8   11.74    2.69
  -9  -6   8   21.01    3.94
  -9  -6   8   18.85    4.33
  -9  -6   8   18.28    2.65
   9   6  -8   21.07    2.74
  -8  -6   8   23.99    4.41
  -8  -6   8   17.76    3.88
  -8  -6   8   17.73    2.58
   8   6  -8   15.45    2.57
  -7  -6   8    0.02    2.14
  -7  -6   8    1.57    3.23
   7  -6  -8    4.55    2.56
  -7  -6   8    1.44    3.48
  -7   6   8    0.30    1.56
   7   6  -8    1.43    2.22
  -7   6   8    3.59    1.54
  -6  -6   8   53.26    5.56
   6  -6  -8   54.04    4.02
  -6  -6   8   53.16    4.04
   6   6  -8   58.79    3.90
  -6   6   8   59.03    4.63
  -6   6   8   53.93    3.56
  -5  -6   8   18.83    2.73
  -5  -6   8   18.93    4.19
   5  -6  -8   18.61    2.86
  -5   6   8   18.73    2.68
  -5   6   8   17.56    2.87
   4  -6  -8   54.69    3.82
  -4  -6   8   57.46    4.14
  -4   6   8   49.69    3.56
  -4   6   8   60.70    5.11
  -3  -6   8   11.33    2.71
   3  -6  -8   12.48    2.68
  -3   6   8   18.63    2.67
  -3   6   8   14.20    2.99
   2  -6  -8   18.72    2.77
   2  -6  -8   18.64    3.26
  -2  -6   8   23.25    3.15
  -2   6   8   15.93    2.62
  -2   6   8   16.81    3.07
   1  -6  -8   18.34    3.46
   1  -6  -8   13.79    2.67
  -1  -6   8   17.11    3.07
  -1   6   8   12.08    2.54
  -1   6   8   10.86    2.94
   0  -6  -8   17.38    3.70
   0  -6   8   15.59    3.12
   0  -6  -8   16.82    2.75
   0   6   8   11.86    2.58
   0   6   8   16.02    3.19
  -1  -6  -8   13.77    3.60
   1   6   8   19.32    2.82
  -2  -6  -8    7.98    3.70
   2   6   8   11.41    2.77
   3  -6   8    3.88    2.67
  -3  -6  -8    3.38    3.56
   3   6   8    0.04    2.57
  -4  -6  -8   29.29    4.76
   4  -6   8   26.84    3.40
   4   6   8   21.84    3.30
   5  -6   8    6.97    3.03
  -5  -6  -8   10.41    4.31
   5   6   8   10.24    3.14
  -6  -6  -8   37.78    5.56
   6   6   8   41.25    4.25
  -7  -6  -8    3.34    4.62
   7   6   8    0.85    3.32
  -8  -6  -8    8.53    4.97
   8   6   8    5.93    3.46
  -9  -6  -8    0.63    4.81
   9   6   8    3.39    3.55
 -10  -6  -8   36.84    6.37
  10   6   8   36.66    4.70
 -11  -6  -8    8.94    5.48
  11   6   8  -10.95    3.46
 -12  -6  -8   -2.70    5.57
  12   6   8   13.86    4.17
 -13  -6  -8    7.04    6.03
  13   6   8    5.45    4.06
 -19  -7   8  -10.41    4.98
 -18  -7   8   -6.67    4.97
 -17  -7   8    3.63    4.74
 -16  -7   8    2.07    4.44
 -15  -7   8    4.73    4.42
 -15   7   8   -2.36    2.35
 -14  -7   8    7.62    4.34
 -14   7   8    3.02    2.25
  14   7  -8    6.33    2.83
 -13  -7   8   17.89    4.58
  13   7  -8   14.13    2.96
 -13   7   8   10.90    2.36
 -12  -7   8   28.35    4.83
 -12   7   8   25.72    2.79
  12   7  -8   26.52    3.21
 -11  -7   8   -1.09    3.73
 -11   7   8    2.66    2.37
  11   7  -8   -1.94    2.36
 -11   7   8    6.01    2.21
 -10  -7   8   18.99    4.28
 -10  -7   8   17.32    4.58
  10   7  -8   23.91    2.92
 -10   7   8   17.22    2.54
  -9  -7   8   18.39    2.70
  -9  -7   8   22.16    4.61
  -9  -7   8   13.33    3.97
  -9   7   8   16.34    2.50
   9   7  -8   17.41    2.72
  -8  -7   8   -1.04    3.58
  -8  -7   8    1.95    3.37
  -8  -7   8    3.98    2.19
   8   7  -8   -0.06    2.29
  -8   7   8    4.37    1.82
  -7  -7   8   33.56    4.47
  -7  -7   8   30.05    2.99
  -7  -7   8   33.18    4.88
   7  -7  -8   30.40    3.51
   7   7  -8   32.76    3.19
  -6  -7   8   -0.84    3.14
  -6  -7   8   -4.23    3.46
   6  -7  -8   -3.37    2.44
  -6  -7   8    1.53    2.15
  -6   7   8    1.68    2.24
  -5  -7   8    3.28    3.79
  -5  -7   8    7.99    2.43
   5  -7  -8    9.01    2.65
  -5   7   8    2.72    2.42
   4  -7  -8   10.87    2.59
  -4  -7   8   10.71    2.46
  -4   7   8    8.58    2.74
  -4   7   8   10.42    2.47
  -3  -7   8    3.85    2.47
   3  -7  -8    6.24    2.79
   3  -7  -8    0.32    2.46
  -3   7   8    2.20    2.27
  -3   7   8    6.54    2.64
  -2  -7   8   33.65    3.52
   2  -7  -8   36.31    3.90
   2  -7  -8   30.63    3.11
  -2   7   8   33.99    3.03
  -2   7   8   27.35    3.49
   1  -7  -8   -1.95    2.28
   1  -7  -8   -0.90    3.03
  -1  -7   8    3.84    2.75
  -1   7   8    2.83    2.75
  -1   7   8    0.03    2.13
   0  -7   8    6.98    2.87
   0  -7  -8    4.55    3.27
   0  -7  -8    6.37    2.56
   0   7   8    5.59    2.38
   0   7   8    0.30    2.77
  -1  -7  -8    1.01    3.34
   1   7   8    1.81    2.32
  -2  -7  -8   -0.16    3.54
   2   7   8    3.57    2.51
  -3  -7  -8   29.19    4.65
   3  -7   8   35.70    3.85
   3   7   8   31.28    3.35
  -4  -7  -8    2.69    4.00
   4  -7   8    2.34    2.78
   4   7   8   -1.07    2.60
   5  -7   8    3.33    2.92
  -5  -7  -8    3.95    4.28
   5   7   8   -1.20    2.78
  -6  -7  -8    1.24    4.44
   6  -7   8    8.11    2.98
   6   7   8   -0.49    2.97
  -7  -7  -8    0.65    4.70
   7   7   8    2.82    3.16
  -8  -7  -8    2.98    4.87
   8   7   8    2.03    3.32
  -9  -7  -8   13.18    5.28
   9   7   8   10.02    3.65
 -10  -7  -8   -0.86    5.12
  10   7   8    5.64    3.54
 -11  -7  -8    5.82    5.72
  11   7   8    9.41    3.86
 -12  -7  -8    8.13    5.81
  12   7   8   -5.32    3.58
 -13  -7  -8   10.66    6.26
 -19  -8   8   -3.58    5.43
 -18  -8   8   -5.40    5.15
 -17  -8   8  -11.19    4.52
 -16  -8   8   -0.94    4.71
 -15  -8   8   -4.83    4.23
 -14  -8   8   -1.72    4.01
  14   8  -8    3.42    2.74
 -13  -8   8   61.33    6.10
  13   8  -8   60.87    4.17
 -12  -8   8    2.33    3.91
  12   8  -8    0.52    2.42
 -11  -8   8   62.30    5.90
 -11   8   8   69.92    4.20
 -11   8   8   56.59    4.06
  11   8  -8   55.84    3.91
 -10  -8   8    3.98    3.87
 -10  -8   8    2.98    4.21
 -10   8   8    0.17    2.02
  10   8  -8    1.30    2.34
  -9  -8   8   12.97    4.50
  -9  -8   8   15.71    4.20
  -9  -8   8   13.71    2.52
   9   8  -8   14.36    2.68
  -9   8   8   14.46    2.33
  -8  -8   8    7.90    4.10
  -8  -8   8    3.45    3.63
  -8  -8   8    6.54    2.27
   8   8  -8    4.17    2.44
  -8   8   8    4.66    2.14
  -7  -8   8    4.13    2.20
  -7  -8   8    2.52    3.51
  -7  -8   8    4.26    3.83
  -7   8   8    1.76    1.30
   6  -8  -8   11.43    2.92
  -6  -8   8   11.09    2.42
  -6  -8   8    4.78    3.92
  -6  -8   8    7.27    3.58
  -6   8   8    7.62    2.44
  -5  -8   8    7.10    2.34
  -5  -8   8    3.93    3.41
   5  -8  -8   -1.59    2.53
  -5  -8   8   -7.03    3.53
  -5   8   8    1.00    2.38
  -4  -8   8    2.16    3.93
  -4  -8   8    7.06    2.46
   4  -8  -8    8.09    2.65
  -4   8   8    4.70    2.57
   3  -8  -8   27.21    3.62
   3  -8  -8   35.36    3.37
  -3  -8   8   31.46    3.32
  -3   8   8   33.07    3.00
  -3   8   8   33.47    3.45
  -2  -8   8   11.13    2.94
   2  -8  -8    9.17    2.66
   2  -8  -8    9.35    3.22
  -2   8   8   15.39    2.56
  -2   8   8    9.77    2.98
   1  -8  -8   53.66    4.92
   1  -8  -8   59.12    4.70
  -1  -8   8   67.35    5.15
  -1   8   8   54.53    4.47
  -1   8   8   58.04    4.14
   0  -8  -8    4.13    2.47
   0  -8  -8   -1.38    3.26
   0   8   8   -0.75    2.17
  -1  -8  -8    0.10    2.35
  -1  -8  -8   -1.43    3.33
   1   8   8    3.69    2.37
  -2  -8  -8    5.37    3.85
   2   8   8    5.11    2.45
   3  -8   8    0.19    2.74
  -3  -8  -8    3.82    3.96
   3   8   8    0.54    2.50
   4  -8   8   26.95    3.56
  -4  -8  -8   19.14    4.85
   4   8   8   21.72    3.14
  -5  -8  -8    5.58    4.40
   5  -8   8    5.32    2.88
   5   8   8    1.50    2.76
  -6  -8  -8   -1.67    4.35
   6  -8   8    0.86    2.82
   6   8   8   -0.41    2.74
  -7  -8  -8    6.78    4.71
   7   8   8   14.56    3.20
  -8  -8  -8    2.71    4.78
   8   8   8    5.30    3.09
  -9  -8  -8    5.16    5.14
   9   8   8    9.00    3.22
 -10  -8  -8   -1.06    5.17
  10   8   8    2.64    3.39
 -11  -8  -8    6.77    5.77
 -12  -8  -8    5.52    6.05
 -18  -9   8   -7.96    5.07
 -17  -9   8   -6.49    4.91
 -16  -9   8    1.12    4.86
 -15  -9   8   -3.29    4.34
 -14  -9   8    2.60    4.32
 -13  -9   8   -1.04    4.02
 -12  -9   8    3.86    4.03
  12   9  -8    5.74    2.43
 -11  -9   8    3.52    3.99
  11   9  -8   12.39    2.67
 -10  -9   8   11.26    4.79
 -10  -9   8   12.10    4.34
  10   9  -8   14.61    2.68
  -9  -9   8    7.19    2.40
  -9  -9   8    3.76    4.29
  -9  -9   8    9.51    4.14
  -9   9   8    6.02    2.08
   9   9  -8    5.71    2.49
  -8  -9   8   13.78    2.45
  -8  -9   8   13.67    4.08
  -8  -9   8   10.00    4.52
  -8   9   8    6.31    2.20
  -7  -9   8   63.16    5.58
  -7  -9   8   62.21    4.15
  -7  -9   8   61.42    6.36
  -6  -9   8   10.15    3.75
  -6  -9   8   13.80    2.51
  -6  -9   8    8.52    4.26
  -6   9   8    7.77    2.42
  -5  -9   8    9.69    3.70
   5  -9  -8    8.07    2.91
  -5  -9   8   11.80    2.55
  -5  -9   8   10.24    4.36
  -5   9   8    7.36    2.57
   4  -9  -8    2.14    2.63
  -4  -9   8    0.49    2.32
  -4  -9   8    8.96    3.69
  -4  -9   8    4.73    4.24
  -4   9   8    6.08    2.71
  -3  -9   8   10.05    2.79
   3  -9  -8   12.99    3.28
   3  -9  -8   13.10    2.88
  -3   9   8   13.51    3.06
   2  -9  -8   31.17    4.02
  -2  -9   8   33.13    3.63
   2  -9  -8   34.20    3.38
  -2   9   8   28.94    3.78
   1  -9  -8   -1.46    3.12
  -1  -9   8    2.07    2.88
   1  -9  -8   -0.69    2.43
  -1   9   8   -0.76    2.19
   0  -9  -8   25.90    3.11
   0  -9  -8   23.07    4.27
   0   9   8   23.89    2.85
  -1  -9  -8   18.89    4.19
  -1  -9  -8   13.08    2.71
   1   9   8   17.80    2.63
  -2  -9  -8    3.93    4.03
   2   9   8    0.45    2.36
  -3  -9  -8    4.77    4.20
   3   9   8    0.82    2.41
  -4  -9  -8   -0.12    4.17
   4  -9   8    1.42    2.77
   4   9   8   -1.49    2.44
  -5  -9  -8    1.74    4.32
   5  -9   8    6.43    2.78
   5   9   8   -1.31    2.51
   6  -9   8    5.91    2.94
  -6  -9  -8    5.77    4.62
   6   9   8    1.49    2.76
  -7  -9  -8    2.42    4.63
   7   9   8    4.21    2.85
  -8  -9  -8    2.18    4.98
   8   9   8    1.71    2.73
  -9  -9  -8   -0.43    5.15
   9   9   8    0.58    2.86
 -10  -9  -8    1.10    5.31
 -11  -9  -8    8.01    5.77
 -12  -9  -8    4.13    5.85
 -18 -10   8    1.55    5.65
 -17 -10   8   -8.61    5.11
 -16 -10   8    0.11    4.89
 -15 -10   8    7.89    4.81
 -14 -10   8    0.10    4.45
 -13 -10   8   25.49    5.28
 -12 -10   8   -2.81    4.07
 -11 -10   8   23.01    4.80
  11  10  -8   29.15    3.04
 -10 -10   8    1.93    4.03
  -9 -10   8   16.39    2.63
  -9 -10   8   18.49    4.59
  -9 -10   8   15.99    4.88
  -9  10   8   11.71    2.13
  -8 -10   8    1.57    4.45
  -8 -10   8    0.18    3.89
  -8 -10   8    3.06    2.18
  -8  10   8   -1.74    2.04
  -7 -10   8    7.26    2.32
  -7 -10   8    4.60    4.44
  -7 -10   8    5.57    3.83
  -6 -10   8    8.75    2.42
  -6 -10   8    4.04    3.70
  -6 -10   8   10.26    4.49
  -6  10   8    4.44    2.55
  -5 -10   8   -2.46    3.44
  -5 -10   8    4.21    2.34
  -5 -10   8   -3.62    4.06
   5 -10  -8    2.95    2.90
  -5  10   8    0.25    2.59
  -4 -10   8    8.14    2.52
   4 -10  -8    7.71    2.94
  -4 -10   8    5.71    3.61
   4 -10  -8    8.50    2.96
  -4 -10   8    9.29    4.56
  -4  10   8    6.00    2.92
  -3 -10   8    8.36    4.46
   3 -10  -8    9.00    2.96
  -3 -10   8    8.91    3.71
  -3 -10   8   11.70    2.85
   3 -10  -8    8.33    3.19
  -3  10   8    3.43    2.95
  -2 -10   8    6.08    2.80
   2 -10  -8    1.86    3.38
   2 -10  -8    3.13    2.62
  -2  10   8   -1.16    2.98
   1 -10  -8    5.30    2.62
  -1 -10   8    3.54    3.03
   1 -10  -8    1.81    3.45
   0 -10  -8    6.46    3.85
   0 -10  -8    5.97    2.69
   0  10   8    9.07    2.38
  -1 -10  -8    0.03    3.80
   1  10   8   -0.89    2.20
  -2 -10  -8   22.19    4.70
   2  10   8   14.60    2.55
  -3 -10  -8    0.77    4.25
   3  10   8    4.81    2.29
  -4 -10  -8    2.07    4.35
   4 -10   8    6.53    2.80
   4  10   8   -1.69    2.24
   5 -10   8   10.15    2.96
  -5 -10  -8    7.31    4.59
   5  10   8    4.43    2.42
  -6 -10  -8    6.39    4.73
   6  10   8    5.87    2.46
  -7 -10  -8   -1.02    4.84
   7  10   8   -2.45    2.50
  -8 -10  -8    3.56    5.12
  -9 -10  -8    1.37    5.30
 -10 -10  -8    2.14    5.48
 -11 -10  -8    9.64    6.00
 -17 -11   8   -9.28    5.18
 -16 -11   8   -5.10    4.94
 -15 -11   8   -5.40    4.82
 -14 -11   8   -0.40    4.60
 -13 -11   8   -1.51    4.47
 -12 -11   8   13.48    4.76
 -11 -11   8    1.25    4.10
 -10 -11   8    7.29    4.22
  -9 -11   8   14.17    4.49
  -9 -11   8   27.83    5.55
  -9 -11   8   24.54    2.65
  -8 -11   8   17.41    2.42
  -8 -11   8   16.51    4.98
  -8 -11   8   16.06    4.49
  -8  11   8    7.60    2.23
  -7 -11   8   56.54    5.78
  -7 -11   8   62.19    4.18
  -7 -11   8   69.88    6.85
  -6 -11   8   26.39    2.87
  -6 -11   8   38.53    5.62
  -6 -11   8   30.36    4.73
  -6  11   8   21.98    3.17
  -5 -11   8   -3.68    4.04
  -5 -11   8   -2.34    2.31
  -5 -11   8    3.06    3.63
  -5  11   8   -3.68    2.67
  -4 -11   8    0.23    4.31
  -4 -11   8    3.29    3.68
   4 -11  -8    1.80    2.87
  -4 -11   8   -2.24    2.32
   4 -11  -8    1.86    2.96
  -4  11   8   -3.47    2.89
   3 -11  -8    2.60    3.22
  -3 -11   8    1.63    2.57
  -3 -11   8    2.60    4.36
  -3 -11   8    0.86    3.51
   3 -11  -8   -0.23    2.77
  -3  11   8    0.05    3.05
   2 -11  -8   25.39    4.16
  -2 -11   8   25.97    4.25
  -2 -11   8   32.93    3.79
   2 -11  -8   30.19    3.41
   1 -11  -8    3.56    2.66
  -1 -11   8   -8.52    2.94
  -1 -11   8   -4.95    2.91
   1 -11  -8    3.14    3.74
   0 -11  -8   38.82    3.50
   0 -11  -8   42.59    5.04
  -1 -11  -8    1.80    3.95
  -2 -11  -8   -1.48    3.99
   2  11   8    4.56    2.12
  -3 -11  -8    2.28    4.19
   3  11   8   -0.43    2.01
   4 -11   8    2.67    2.77
  -4 -11  -8    4.03    4.35
   4  11   8   -2.21    2.03
  -5 -11  -8   15.95    4.95
   5  11   8   14.19    2.49
  -6 -11  -8   11.23    5.13
  -7 -11  -8   15.45    5.42
  -8 -11  -8   -0.46    5.20
  -9 -11  -8   -8.50    5.09
 -10 -11  -8    9.17    5.97
 -16 -12   8   -9.84    5.33
 -15 -12   8   -5.53    4.82
 -14 -12   8   -8.36    4.64
 -13 -12   8   -3.59    4.50
 -12 -12   8   -6.21    4.38
 -11 -12   8    8.33    4.50
 -10 -12   8    5.76    4.23
  -9 -12   8    2.15    2.06
  -9 -12   8    1.09    3.94
  -9 -12   8   -4.14    4.37
  -8 -12   8    7.24    4.22
  -8 -12   8    4.26    4.56
  -8 -12   8    7.31    2.19
  -7 -12   8   -1.69    4.53
  -7 -12   8    0.79    2.02
  -7 -12   8    0.85    3.86
  -6 -12   8   -0.49    4.47
  -6 -12   8    2.90    3.85
  -6 -12   8    0.79    2.18
  -6  12   8   -5.72    2.44
  -5 -12   8   -2.54    3.70
  -5 -12   8    3.96    4.32
  -5 -12   8    6.96    2.51
  -5  12   8   -6.80    2.56
  -4 -12   8    0.58    3.60
   4 -12  -8    5.72    3.04
  -4 -12   8   12.09    4.64
  -4 -12   8    2.94    2.53
   4 -12  -8    3.57    3.02
  -4  12   8   -1.83    2.90
  -3 -12   8    4.00    3.48
   3 -12  -8    2.93    2.90
  -3 -12   8    3.70    4.46
  -3 -12   8    6.67    2.73
   3 -12  -8    2.89    3.36
  -3  12   8    0.75    3.13
  -2 -12   8    2.93    3.29
   2 -12  -8    3.06    2.77
  -2 -12   8    2.30    2.82
  -2 -12   8    3.74    4.32
   2 -12  -8    2.35    3.50
  -1 -12   8    5.00    3.41
   1 -12  -8    5.01    3.81
  -1 -12   8    4.86    3.13
   1 -12  -8    3.18    2.68
   0 -12  -8    8.35    4.11
   0 -12  -8    7.90    2.68
   0 -12   8    8.12    3.50
   0 -12   8    8.67    3.36
  -1 -12  -8    5.75    4.06
   1 -12   8   -1.29    3.01
  -2 -12  -8    9.60    4.44
  -3 -12  -8    4.84    4.53
  -4 -12  -8    4.85    4.49
  -5 -12  -8    6.16    4.88
  -6 -12  -8    9.13    5.00
  -7 -12  -8   -3.77    4.84
  -8 -12  -8   -1.40    5.28
  -9 -12  -8    0.94    5.59
 -15 -13   8   -3.37    5.44
 -14 -13   8    1.49    5.10
 -13 -13   8    5.26    5.14
 -12 -13   8    7.24    4.72
 -11 -13   8   -1.68    4.39
 -10 -13   8    3.25    4.41
  -9 -13   8   13.93    4.63
  -8 -13   8   -0.04    4.72
  -8 -13   8   -3.75    3.87
  -7 -13   8    1.34    4.43
  -7 -13   8    9.49    2.17
  -7 -13   8    3.45    4.17
  -6 -13   8    2.57    4.39
  -6 -13   8   -2.86    3.72
  -6 -13   8   -1.64    2.11
  -5 -13   8   32.59    4.80
  -5 -13   8   30.61    5.50
  -5 -13   8   28.77    3.17
  -4 -13   8   -0.83    3.61
   4 -13  -8    2.19    2.98
  -4 -13   8   -3.39    2.32
  -4 -13   8   -4.01    4.09
  -4  13   8   -2.57    2.94
  -3 -13   8    7.02    4.37
  -3 -13   8    0.01    2.60
  -3 -13   8   -1.86    3.36
   3 -13  -8    4.59    3.40
   3 -13  -8    3.44    3.01
  -2 -13   8   14.64    3.26
   2 -13  -8   14.01    3.87
  -2 -13   8   12.75    4.51
  -2 -13   8   17.62    3.86
  -1 -13   8    9.10    3.28
  -1 -13   8    3.35    3.37
  -1 -13   8    8.42    4.35
   1 -13  -8    4.24    3.93
   0 -13  -8    8.34    4.16
   0 -13   8   -0.33    3.19
   0 -13   8   -5.47    3.01
   1 -13   8   12.84    3.51
  -1 -13  -8    3.21    4.23
   2 -13   8    6.49    3.25
  -2 -13  -8    9.20    4.53
  -3 -13  -8   34.44    5.64
   3 -13   8   40.44    4.25
  -4 -13  -8    2.72    4.46
  -5 -13  -8   17.07    5.28
  -6 -13  -8    9.73    5.36
  -7 -13  -8   13.52    5.65
  -8 -13  -8    9.58    5.83
 -14 -14   8   -8.02    5.34
 -13 -14   8   -7.31    4.83
 -12 -14   8    3.48    5.08
 -11 -14   8    9.89    4.90
 -10 -14   8   -1.68    4.56
  -9 -14   8    0.74    4.25
  -8 -14   8   20.89    5.72
  -8 -14   8   13.72    4.55
  -7 -14   8   25.89    5.63
  -7 -14   8   16.02    4.55
  -6 -14   8    4.80    4.66
  -6 -14   8   -7.68    3.62
  -5 -14   8    2.29    2.55
  -5 -14   8   10.63    4.13
  -5 -14   8   14.25    4.98
  -4 -14   8    7.01    4.43
  -4 -14   8   -2.42    2.38
   4 -14  -8    8.79    3.24
  -4 -14   8   -0.88    3.65
   3 -14  -8    9.86    3.62
  -3 -14   8    1.97    4.35
  -3 -14   8    7.62    2.87
  -3 -14   8   19.05    4.07
  -2 -14   8   -2.53    2.78
   2 -14  -8    1.28    3.61
  -2 -14   8   -4.01    3.23
  -2 -14   8   -1.57    4.10
  -1 -14   8   -0.65    2.99
  -1 -14   8    1.32    4.01
   1 -14  -8    6.33    4.00
  -1 -14   8    2.34    3.32
   0 -14   8    1.74    3.35
   0 -14   8   -7.86    3.01
   0 -14  -8    2.25    3.92
   0 -14   8    9.53    4.30
  -1 -14  -8    7.27    4.34
   1 -14   8   -0.70    3.27
   2 -14   8   -0.43    3.25
  -2 -14  -8    4.90    4.63
  -3 -14  -8   -0.56    4.44
  -4 -14  -8    2.49    4.77
  -5 -14  -8   -0.93    4.60
  -6 -14  -8    7.76    5.30
  -7 -14  -8    7.20    5.58
 -12 -15   8    7.57    5.31
 -11 -15   8   -8.34    4.75
 -10 -15   8   -1.86    4.51
  -9 -15   8   -5.17    4.32
  -8 -15   8    1.57    4.34
  -7 -15   8   -3.54    3.98
  -7 -15   8   -3.40    4.73
  -6 -15   8    3.60    4.65
  -6 -15   8   -1.42    3.90
  -5 -15   8   26.58    4.69
  -5 -15   8   26.09    5.46
   4 -15  -8   25.92    3.86
  -4 -15   8   25.46    4.62
  -4 -15   8   26.25    5.46
  -3 -15   8    8.28    3.79
  -3 -15   8   12.59    3.06
   3 -15  -8   17.26    3.98
  -3 -15   8   10.90    4.61
  -2 -15   8   22.15    4.22
   2 -15  -8   31.30    4.69
  -2 -15   8   29.25    5.36
  -2 -15   8   26.13    3.82
   1 -15  -8    2.87    4.20
  -1 -15   8    9.50    4.45
  -1 -15   8    4.12    3.19
  -1 -15   8    2.59    3.55
   0 -15   8    8.90    4.35
   0 -15   8   -0.66    3.36
   0 -15   8    2.74    3.47
   0 -15  -8    1.78    4.01
  -1 -15  -8    5.07    4.38
   1 -15   8   -1.71    3.41
   1 -15   8   -4.38    3.25
   1 -15   8   11.27    4.53
  -2 -15  -8    4.34    4.54
  -3 -15  -8   13.82    5.03
  -4 -15  -8    4.79    5.03
  -5 -15  -8   13.01    5.48
 -10 -16   8   -9.03    4.72
  -9 -16   8  -11.60    4.33
  -8 -16   8  -16.80    4.02
  -7 -16   8   -6.29    4.13
  -6 -16   8   -3.05    4.07
  -6 -16   8   -2.49    4.48
  -5 -16   8    0.47    3.99
  -5 -16   8   -9.21    3.88
  -4 -16   8    1.20    4.37
  -4 -16   8    4.16    3.96
  -3 -16   8    8.05    3.80
  -3 -16   8    2.98    4.50
  -2 -16   8   -1.42    3.42
   2 -16  -8    2.50    3.89
  -2 -16   8    2.60    4.23
  -1 -16   8   -7.93    3.31
   1 -16  -8    7.07    4.11
  -1 -16   8    1.98    4.28
   0 -16  -8    3.56    4.22
   0 -16   8    2.20    4.31
   0 -16   8   -5.54    3.16
   1 -16   8   -2.81    3.43
  -1 -16  -8    4.77    4.57
   1 -16   8   -0.83    4.26
  -2 -16  -8    4.19    4.82
   2 -16   8   11.23    4.62
  -3 -16  -8   14.05    5.19
  -7 -17   8   13.32    4.92
  -6 -17   8   -3.66    4.19
  -6 -17   8    1.82    4.68
  -5 -17   8    4.73    4.59
  -5 -17   8    3.91    4.40
  -4 -17   8    2.16    4.00
  -4 -17   8   -2.16    4.42
  -3 -17   8   11.80    4.76
  -3 -17   8    5.68    3.98
  -2 -17   8    5.51    4.68
  -2 -17   8    6.03    3.85
  -1 -17   8    6.56    4.38
   0 -17  -8    5.99    4.68
   0 -17   8   -7.01    4.21
 -21   0   9   -6.82    4.70
 -20   0   9  -12.71    4.07
 -19   0   9   -8.02    4.19
 -18   0   9   -4.59    3.78
 -17   0   9    0.96    3.83
 -16   0   9   -1.72    3.53
 -15   0   9   -0.80    3.67
 -14   0   9    1.18    3.56
 -13   0   9    0.54    3.38
 -12   0   9   -3.31    3.22
 -11   0   9   -3.18    3.15
 -10   0   9    3.94    3.14
  10   0  -9   -3.12    2.35
   9   0  -9   -1.15    2.36
  -9   0   9    5.22    3.17
  -9   0   9    2.65    2.33
  -8   0   9   -2.27    2.27
  -8   0   9   -0.51    2.94
   8   0  -9   -0.74    2.30
   7   0  -9    1.15    2.26
  -7   0   9    2.85    2.39
  -7   0   9   -5.17    3.04
  -6   0   9    0.18    2.36
   6   0  -9    0.19    2.17
  -5   0   9    0.31    2.39
   5   0  -9    0.98    1.67
   4   0  -9    0.07    0.37
  -4   0   9   -0.16    2.38
  -3   0   9   -1.65    2.44
   3   0  -9    0.61    2.40
  -2   0   9   -2.24    2.48
   2   0  -9   -0.01    2.59
  -1   0   9    4.02    2.71
  -1   0   9    0.43    2.43
   0   0   9    2.19    2.79
   0   0   9    0.47    2.75
   1   0   9   -4.96    2.73
   1   0   9   -0.45    2.74
   2   0   9   -3.16    2.83
   2   0   9   -1.64    2.77
   3   0   9    2.19    3.06
   4   0   9   -1.83    3.07
  -5   0  -9    1.22    4.06
  -6   0  -9   -2.54    4.12
  -7   0  -9    3.22    4.48
  -8   0  -9    2.98    4.64
  -9   0  -9    8.99    4.96
 -10   0  -9    2.84    4.85
 -11   0  -9   11.62    5.33
 -12   0  -9    4.81    5.33
 -13   0  -9    9.91    5.76
 -21  -1   9   -5.32    4.75
 -21   1   9  -13.26    4.38
 -20  -1   9    2.06    4.53
 -20   1   9   -8.21    4.13
 -19  -1   9    0.09    4.33
 -19   1   9   -3.86    4.16
 -18  -1   9   15.28    4.55
 -18   1   9   17.59    4.34
 -17  -1   9   18.39    4.50
 -17   1   9   18.10    4.23
 -16  -1   9    4.84    3.86
 -16   1   9   10.40    3.77
 -15  -1   9    5.03    3.75
 -15   1   9    1.94    3.59
 -14  -1   9   -3.15    3.61
 -14   1   9   -3.49    3.36
 -13  -1   9   42.22    4.84
 -13   1   9   44.22    4.58
 -12  -1   9   16.47    3.86
 -12   1   9   16.25    3.58
 -11  -1   9   18.56    3.79
 -11  -1   9    6.68    3.52
 -11   1   9   12.80    3.46
 -10  -1   9   81.47    6.33
  10   1  -9   87.90    5.67
 -10   1   9   69.34    5.57
  -9  -1   9   61.40    4.55
  -9  -1   9   56.28    5.02
   9  -1  -9   59.56    4.23
  -9   1   9   66.97    4.49
  -9   1   9   58.71    4.77
   9   1  -9   62.56    4.71
  -8  -1   9   15.29    2.73
  -8  -1   9   16.27    3.59
   8  -1  -9   16.05    2.70
   8   1  -9   18.42    2.79
  -8   1   9   15.51    3.30
  -8   1   9   17.54    2.85
   7  -1  -9    1.27    1.58
  -7  -1   9   -2.15    3.27
  -7  -1   9    2.08    2.39
   7   1  -9    1.19    2.33
  -7   1   9    3.54    3.10
  -7   1   9    1.59    2.37
  -6  -1   9   48.68    3.72
   6   1  -9   37.24    3.43
  -6   1   9   38.87    3.52
  -5  -1   9   84.59    5.06
   5  -1  -9   96.74    5.38
   5   1  -9   87.74    5.19
  -5   1   9   82.89    5.27
  -4  -1   9   64.17    4.84
   4  -1  -9   63.96    4.82
  -4   1   9   56.02    4.05
   4   1  -9   66.42    5.16
   3  -1  -9    2.39    2.45
  -3  -1   9    3.47    2.59
   3   1  -9    2.77    2.05
  -3   1   9    1.81    2.43
   2  -1  -9  147.96    7.01
  -2  -1   9  156.69    6.90
  -2   1   9  146.24    6.67
  -2   1   9  144.79    7.39
   1  -1  -9    3.25    2.64
  -1  -1   9    1.59    2.82
  -1  -1   9   -0.16    2.56
  -1   1   9    0.72    2.66
  -1   1   9    3.57    1.94
   0  -1   9    5.12    2.84
   0  -1   9    8.95    2.96
   0   1   9    2.27    1.28
   0   1   9    5.30    2.75
   1  -1   9   43.82    4.14
   1  -1   9   41.68    4.13
   1   1   9   42.15    4.04
   1   1   9   38.40    4.04
   2  -1   9    3.12    2.83
   2  -1   9   -4.64    2.86
   2   1   9    5.60    2.94
   3  -1   9   17.20    3.47
  -3  -1  -9   15.20    4.07
   3   1   9   13.68    3.45
  -4  -1  -9    3.31    3.79
   4   1   9    0.82    3.24
  -5  -1  -9   73.10    6.43
   5   1   9   87.31    6.42
  -6  -1  -9   43.12    5.64
  -7  -1  -9    8.84    4.85
  -7   1  -9   19.11    5.16
  -8  -1  -9   16.11    5.31
  -8   1  -9   17.41    5.21
  -9  -1  -9    6.89    5.10
  -9   1  -9    7.80    4.96
 -10  -1  -9   23.23    5.80
 -10   1  -9   14.10    5.32
 -11  -1  -9    2.21    5.25
 -11   1  -9    3.82    5.01
 -12  -1  -9    4.11    5.53
 -12   1  -9    0.97    5.28
 -13  -1  -9   17.75    6.21
 -13   1  -9   11.20    5.69
 -21  -2   9  -12.46    4.79
 -20  -2   9   -6.07    4.46
 -20   2   9   -5.91    3.99
 -19  -2   9    8.15    4.74
 -19   2   9    3.32    3.93
 -18  -2   9   -0.55    4.13
 -18   2   9   -3.72    3.52
 -17  -2   9    7.40    4.19
 -17   2   9    4.92    3.63
 -16  -2   9   10.38    4.12
 -16   2   9   17.90    3.86
 -15  -2   9   -3.98    3.65
 -15   2   9   -2.63    3.29
 -14  -2   9   -0.27    3.75
 -14   2   9   -0.76    3.27
 -13  -2   9   16.55    4.14
 -13   2   9   14.66    3.55
 -12  -2   9   16.92    3.93
 -12   2   9   17.26    3.66
 -11  -2   9   -3.15    3.29
 -11  -2   9    1.41    3.39
  11   2  -9    1.21    2.63
 -10  -2   9   22.72    3.98
 -10  -2   9   18.77    2.89
 -10  -2   9   20.52    4.07
  10   2  -9   22.35    3.05
 -10   2   9   19.44    3.42
  -9  -2   9    0.73    3.23
   9  -2  -9   -1.46    1.16
  -9  -2   9   -3.03    2.25
  -9   2   9   -2.31    2.59
   9   2  -9    1.12    2.26
   8  -2  -9    0.69    0.63
  -8  -2   9    0.88    3.22
  -8  -2   9    0.17    2.19
  -8   2   9   -1.29    2.24
   8   2  -9   -1.26    2.32
  -8   2   9    2.93    2.80
  -7  -2   9    3.15    2.43
   7  -2  -9   -0.48    2.10
  -7  -2   9   -0.91    3.34
  -7   2   9    4.45    2.86
  -7   2   9    3.13    2.34
   7   2  -9   -1.26    2.31
  -6  -2   9   -2.91    2.30
   6  -2  -9    0.60    2.35
   6   2  -9   -1.88    2.23
  -6   2   9   -2.06    2.29
   5  -2  -9    0.51    2.44
  -5  -2   9    2.22    2.50
  -5   2   9    6.44    2.51
   5   2  -9    4.26    2.47
  -4  -2   9   93.19    5.21
   4  -2  -9   88.56    5.51
  -4   2   9   89.99    5.31
   4   2  -9   88.51    5.43
  -3  -2   9    3.83    2.59
   3  -2  -9    4.70    2.53
  -3   2   9    0.62    2.41
   3   2  -9    0.42    2.56
  -3   2   9   -0.01    2.70
   2  -2  -9   93.72    5.59
  -2  -2   9   88.76    5.43
  -2   2   9   82.97    5.30
  -2   2   9   98.28    6.29
   1  -2  -9    3.20    2.67
  -1  -2   9    0.28    2.72
  -1   2   9    0.59    2.58
  -1   2   9    2.97    2.76
   0  -2   9    5.23    2.88
   0  -2   9   -0.30    2.69
   0   2   9    5.53    2.61
   0   2   9    1.47    2.71
   1  -2   9    0.55    2.86
   1  -2   9   -1.53    2.70
   1   2   9   -0.66    2.70
   2  -2   9   10.49    2.92
   2  -2   9    7.35    3.07
  -2  -2  -9    3.64    3.56
   2   2   9    4.08    3.02
  -3  -2  -9   -5.64    3.32
   3   2   9   -3.95    2.85
  -4  -2  -9   10.61    4.19
   4   2   9   14.87    3.63
  -5  -2  -9    1.24    4.09
   5   2   9    0.89    3.38
  -6  -2  -9    2.49    4.42
   6   2   9   -0.64    3.30
  -7  -2  -9   -1.70    4.50
  -8  -2  -9    4.77    4.85
  -9  -2  -9   -4.33    4.76
 -10  -2  -9    5.79    5.10
 -11  -2  -9   18.14    5.98
 -11   2  -9    5.26    5.02
 -12  -2  -9   19.03    6.17
 -12   2  -9   22.94    5.81
 -13  -2  -9   -6.24    5.81
 -13   2  -9   10.33    5.55
 -21  -3   9  -12.79    5.00
 -20  -3   9    0.31    4.97
 -19  -3   9   -3.65    4.35
 -19   3   9   -2.40    3.74
 -18  -3   9   -5.59    4.22
 -18   3   9    3.25    3.62
 -17  -3   9   17.67    4.67
 -17   3   9   18.94    3.77
 -16  -3   9   14.82    4.43
 -16   3   9   20.68    3.78
 -15  -3   9    4.90    3.92
 -15   3   9    5.65    3.21
 -14  -3   9   -3.41    3.67
 -14   3   9   -0.93    3.07
 -13  -3   9    6.22    3.94
 -13   3   9    8.10    3.25
 -12  -3   9    6.75    3.82
 -12   3   9   13.02    3.35
 -11  -3   9    0.65    3.49
 -11  -3   9    8.75    3.82
  11   3  -9   -0.50    2.44
 -10  -3   9    1.00    3.42
 -10  -3   9   13.23    3.86
 -10  -3   9    7.35    2.50
  10   3  -9    8.09    2.61
  -9  -3   9   25.65    4.22
  -9  -3   9   19.22    2.86
   9   3  -9   28.43    3.12
  -9   3   9   23.80    3.24
  -8  -3   9   12.85    2.63
  -8  -3   9   13.97    3.72
   8  -3  -9   10.10    2.75
   8   3  -9   10.85    2.70
  -8   3   9   12.30    2.69
  -8   3   9   11.30    2.92
  -7  -3   9   39.46    3.43
  -7  -3   9   38.04    4.81
   7  -3  -9   42.27    3.65
  -7   3   9   38.71    3.38
  -7   3   9   42.09    3.87
   7   3  -9   44.44    3.57
  -6  -3   9   20.51    2.96
   6  -3  -9   22.15    2.96
  -6   3   9   20.34    2.97
   6   3  -9   19.20    2.93
  -5  -3   9  109.87    5.56
   5  -3  -9   97.98    5.70
  -5   3   9  106.47    5.38
   5   3  -9  107.83    6.01
   4  -3  -9   16.28    2.79
  -4  -3   9   12.87    2.87
  -4   3   9   11.39    2.76
   4   3  -9   17.45    3.02
  -4   3   9   11.85    2.94
  -3  -3   9   42.53    3.63
   3  -3  -9   36.77    3.56
  -3   3   9   34.92    3.83
   3   3  -9   42.62    3.65
  -3   3   9   37.09    3.43
   2  -3  -9   48.35    3.86
  -2  -3   9   48.26    3.94
  -2   3   9   44.65    3.78
  -2   3   9   50.47    4.29
  -1  -3   9   18.85    3.22
   1  -3  -9   18.25    3.09
  -1   3   9   15.47    3.00
  -1   3   9   18.92    3.38
   0  -3   9   35.80    3.86
   0   3   9   35.79    3.88
   0   3   9   30.21    3.46
  -1  -3  -9   20.27    3.93
   1  -3   9   18.07    3.49
   1  -3   9   18.11    3.27
   1   3   9   21.62    3.41
   1   3   9   16.43    3.09
   2  -3   9    3.48    2.86
  -2  -3  -9    0.11    3.34
   2  -3   9    3.14    2.80
   2   3   9    0.34    2.76
   3  -3   9    5.65    2.93
  -3  -3  -9    4.86    3.78
   3   3   9   -0.66    3.00
  -4  -3  -9   -0.82    3.74
   4   3   9    4.19    3.24
  -5  -3  -9   30.47    5.05
   5   3   9   20.97    4.04
  -6  -3  -9   25.73    5.18
   6   3   9   23.30    4.22
  -7  -3  -9   -2.19    4.41
   7   3   9   -2.08    3.54
  -8  -3  -9   31.68    5.71
  -9  -3  -9   15.02    5.28
 -10  -3  -9   -1.94    4.96
 -11  -3  -9    1.43    5.34
 -12  -3  -9   -1.38    5.46
 -13  -3  -9    4.19    5.84
 -20  -4   9  -13.56    4.73
 -19  -4   9   -3.38    4.65
 -18  -4   9   -5.59    4.30
 -18   4   9   -6.98    3.27
 -17  -4   9   -1.12    4.29
 -17   4   9   -4.40    3.11
 -16  -4   9   -1.84    3.96
 -16   4   9    0.71    3.11
 -15  -4   9   11.81    4.24
 -15   4   9    7.47    3.11
 -14  -4   9   13.07    4.37
 -14   4   9   17.55    3.49
 -13  -4   9    7.60    4.04
 -13   4   9   10.39    3.23
 -12  -4   9    1.62    3.69
 -12   4   9   -0.05    3.01
 -11  -4   9    9.89    4.10
 -11  -4   9    9.32    3.82
  11   4  -9   11.80    2.82
 -10  -4   9   29.14    4.41
 -10  -4   9   32.27    3.22
 -10  -4   9   29.09    4.69
  10   4  -9   37.77    3.47
  -9  -4   9    0.20    3.42
  -9  -4   9   -2.26    2.26
  -9  -4   9   -2.87    3.24
  -9   4   9   -0.49    2.36
   9   4  -9   -2.57    2.34
  -8  -4   9    0.06    2.25
  -8  -4   9    3.90    3.58
   8   4  -9   -0.99    2.20
  -8   4   9    2.02    2.42
  -7  -4   9    5.88    2.48
  -7  -4   9    4.37    3.64
   7  -4  -9    3.54    2.60
  -7   4   9    1.52    2.56
   7   4  -9    3.02    2.40
  -7   4   9    4.01    2.39
   6  -4  -9    5.26    2.58
  -6  -4   9    7.88    2.57
  -6   4   9    9.89    2.57
  -6   4   9   11.83    2.89
   6   4  -9    8.19    2.62
  -5  -4   9   -1.41    2.37
   5  -4  -9   -1.67    2.21
  -5   4   9    1.37    2.40
  -5   4   9    0.39    2.55
   5   4  -9    3.82    2.57
  -4  -4   9   27.41    3.22
   4  -4  -9   24.89    3.08
   4   4  -9   25.00    3.28
  -4   4   9   19.89    3.33
  -4   4   9   22.32    2.99
   3  -4  -9    7.07    2.56
  -3  -4   9    6.85    2.72
  -3   4   9    6.87    2.58
  -3   4   9   10.44    3.04
  -2  -4   9    4.58    2.70
   2  -4  -9    6.40    2.65
  -2   4   9    2.87    2.89
  -2   4   9    3.75    2.61
  -1  -4   9   33.90    3.76
   1  -4  -9   33.84    3.41
  -1   4   9   32.85    3.75
  -1   4   9   29.05    3.34
   0  -4  -9    0.43    2.54
   0  -4   9    3.00    2.83
   0  -4  -9    1.63    3.10
   0   4   9    1.26    2.57
   0   4   9    0.57    2.93
   1  -4   9   11.59    3.22
  -1  -4  -9    8.00    3.54
   1  -4   9   10.70    3.03
   1   4   9    5.61    2.72
   2  -4   9   12.51    3.13
  -2  -4  -9    9.25    3.85
   2   4   9   11.90    3.03
  -3  -4  -9    2.40    3.75
   3  -4   9   -0.05    2.76
   3   4   9    3.20    2.99
  -4  -4  -9    6.02    4.05
   4   4   9    8.77    3.33
  -5  -4  -9    4.77    4.31
   5   4   9    9.58    3.47
  -6  -4  -9    0.53    4.45
   6   4   9    6.75    3.69
  -7  -4  -9   -7.41    4.40
   7   4   9   -7.82    3.42
  -8  -4  -9    4.57    4.77
   8   4   9    2.96    3.72
  -9  -4  -9   17.67    5.50
   9   4   9   17.05    4.13
 -10  -4  -9    9.26    5.61
  10   4   9   -5.30    3.66
 -11  -4  -9   24.47    6.13
 -12  -4  -9    3.82    5.65
 -13  -4  -9    2.47    5.83
 -20  -5   9    1.67    5.10
 -19  -5   9   -2.87    4.87
 -18  -5   9   -0.59    4.72
 -17  -5   9   22.23    5.09
 -17   5   9   19.31    3.57
 -16  -5   9    2.71    4.31
 -16   5   9   -0.02    2.85
 -15  -5   9   62.09    5.99
 -15   5   9   57.35    5.06
 -14  -5   9    1.69    4.09
 -14   5   9    3.85    2.95
 -13  -5   9    5.94    4.07
 -13   5   9    2.68    2.92
 -12  -5   9   27.21    4.79
 -12   5   9   26.68    3.57
  12   5  -9   33.69    3.54
 -11  -5   9   -1.90    3.79
 -11  -5   9   -0.16    3.55
  11   5  -9    0.42    2.55
 -10  -5   9   10.42    3.92
 -10  -5   9   18.76    4.31
 -10  -5   9   12.39    2.70
  10   5  -9    9.21    2.80
  -9  -5   9    1.90    2.40
  -9  -5   9    4.36    3.74
  -9  -5   9    2.65    3.48
   9   5  -9    1.89    2.34
  -8  -5   9    0.73    3.52
  -8  -5   9   -0.33    2.28
   8   5  -9   -0.70    2.33
  -8   5   9   -1.16    2.17
  -7  -5   9   25.36    3.07
   7  -5  -9   21.25    3.22
  -7  -5   9   24.46    4.51
  -7   5   9   26.73    3.04
  -7   5   9   25.81    3.21
   7   5  -9   33.83    3.31
  -6  -5   9   -2.58    3.53
   6  -5  -9   -0.31    2.45
  -6  -5   9    2.45    2.30
  -6   5   9   -1.69    2.23
  -6   5   9    2.87    2.70
   6   5  -9    2.58    2.50
   5  -5  -9   29.13    3.31
  -5  -5   9   29.63    3.28
  -5   5   9   24.00    3.03
  -5   5   9   28.44    3.45
   5   5  -9   30.27    3.40
  -4  -5   9    2.33    2.44
   4  -5  -9   -0.77    2.39
  -4   5   9   -2.17    2.19
  -4   5   9    1.36    2.65
   3  -5  -9   16.13    2.76
  -3  -5   9   16.14    2.97
  -3   5   9   14.54    2.77
  -3   5   9   13.19    3.21
   2  -5  -9    0.09    2.40
  -2  -5   9    1.87    2.65
  -2   5   9    0.05    2.51
  -2   5   9   -0.75    2.71
   1  -5  -9    5.64    3.27
   1  -5  -9   10.83    2.83
  -1  -5   9    5.83    2.88
  -1   5   9   10.08    3.24
  -1   5   9    8.22    2.63
   0  -5   9   49.71    4.43
   0  -5  -9   49.61    4.88
   0  -5  -9   53.74    4.04
   0   5   9   50.61    4.59
   0   5   9   54.14    3.92
   1  -5   9   16.36    3.46
  -1  -5  -9   15.54    3.99
   1   5   9   12.87    2.98
   2  -5   9   15.07    3.25
  -2  -5  -9    8.76    3.95
   2   5   9   15.15    3.08
  -3  -5  -9   21.18    4.52
   3  -5   9   24.16    3.66
   3   5   9   23.95    3.44
  -4  -5  -9   12.66    4.26
   4   5   9   15.84    3.49
  -5  -5  -9   89.90    8.04
   5   5   9   84.47    6.21
  -6  -5  -9    3.24    4.72
   6   5   9   -0.94    3.46
  -7  -5  -9    0.75    4.69
   7   5   9    5.17    3.64
  -8  -5  -9   10.86    5.10
   8   5   9    3.29    3.70
  -9  -5  -9    6.08    5.19
   9   5   9    5.92    3.90
 -10  -5  -9   -1.95    5.32
  10   5   9    3.36    4.07
 -11  -5  -9   13.31    5.94
  11   5   9    5.24    4.14
 -12  -5  -9    2.90    5.98
  12   5   9    1.07    4.21
 -13  -5  -9   19.61    6.71
  13   5   9   12.91    4.69
 -20  -6   9  -11.00    4.97
 -19  -6   9   -7.22    4.83
 -18  -6   9    2.50    4.92
 -17  -6   9   -2.40    4.44
 -16  -6   9    0.50    4.31
 -16   6   9   -2.38    2.66
 -15  -6   9   12.20    4.49
 -15   6   9    4.24    2.67
 -14  -6   9   15.25    4.52
 -14   6   9   11.85    2.92
 -13  -6   9   21.02    4.72
 -13   6   9   18.12    3.14
 -12  -6   9    4.99    4.15
  12   6  -9   -0.89    2.75
 -12   6   9    0.93    2.76
 -11  -6   9    9.93    4.02
 -11  -6   9    9.44    4.39
  11   6  -9    8.81    2.82
 -10  -6   9   19.16    4.20
 -10  -6   9   17.62    4.58
 -10  -6   9   14.14    2.72
  10   6  -9   20.69    2.95
  -9  -6   9    5.39    3.62
  -9  -6   9    7.73    2.59
  -9  -6   9    6.42    3.95
  -9   6   9   10.02    2.64
   9   6  -9    6.17    2.65
  -8  -6   9    7.97    2.49
  -8  -6   9    0.81    3.41
  -8  -6   9    3.84    3.75
   8   6  -9    6.32    2.56
  -8   6   9    3.20    2.58
  -7  -6   9    4.73    2.40
  -7  -6   9    1.30    3.70
   7   6  -9   -0.45    2.42
  -7   6   9    3.05    2.08
  -7   6   9    3.61    2.60
  -6  -6   9    1.05    2.34
  -6  -6   9    5.52    3.86
   6  -6  -9    1.66    2.56
  -6   6   9    2.49    2.36
  -6   6   9    0.50    2.55
   6   6  -9    2.75    2.59
  -5  -6   9    2.23    2.54
   5  -6  -9   -1.38    2.34
  -5   6   9    0.95    2.60
  -5   6   9    1.71    2.33
  -4  -6   9   -1.80    2.40
   4  -6  -9    4.29    2.55
  -4   6   9    3.81    2.62
  -4   6   9    3.32    2.35
   3  -6  -9    2.51    2.43
  -3  -6   9    2.79    2.57
  -3   6   9    1.45    2.33
  -3   6   9    1.51    2.81
   2  -6  -9    4.30    2.70
  -2  -6   9   10.08    2.99
   2  -6  -9   10.23    3.30
  -2   6   9   10.56    3.19
  -2   6   9    8.63    2.68
  -1  -6   9   18.57    3.33
   1  -6  -9   19.44    3.03
   1  -6  -9   16.38    3.62
  -1   6   9   14.94    2.93
  -1   6   9   14.98    3.30
   0  -6  -9    0.11    3.34
   0  -6  -9    3.65    2.68
   0  -6   9    1.06    2.95
   0   6   9   -0.46    2.47
  -1  -6  -9   -1.47    3.44
   1   6   9   -0.10    2.56
  -2  -6  -9   40.62    5.03
   2  -6   9   43.19    4.28
   2   6   9   42.33    3.89
  -3  -6  -9   -0.54    3.83
   3   6   9   -0.58    2.78
  -4  -6  -9    0.02    4.19
   4   6   9    0.57    2.98
  -5  -6  -9    1.04    4.20
   5   6   9    0.95    3.20
  -6  -6  -9    0.52    4.54
   6   6   9   -0.96    3.30
  -7  -6  -9   -1.34    4.53
   7   6   9    4.70    3.62
  -8  -6  -9    1.97    4.82
   8   6   9   -8.59    3.26
  -9  -6  -9   -7.03    4.82
   9   6   9   -2.21    3.62
 -10  -6  -9    8.45    5.51
  10   6   9    5.20    3.98
 -11  -6  -9    5.33    5.67
  11   6   9   -0.94    3.88
 -12  -6  -9    6.49    5.92
  12   6   9   -4.63    3.94
 -19  -7   9  -11.47    5.05
 -18  -7   9   -2.28    4.84
 -17  -7   9   11.98    5.00
 -16  -7   9    9.27    4.74
 -15  -7   9   20.17    4.87
 -15   7   9   13.61    2.62
 -14  -7   9   -0.66    3.96
 -14   7   9    1.26    2.35
 -13  -7   9   35.40    5.32
 -13   7   9   36.51    3.38
  13   7  -9   36.27    3.67
 -12  -7   9   24.01    4.83
  12   7  -9   25.25    3.31
 -12   7   9   20.83    3.04
 -11  -7   9    2.26    3.90
 -11  -7   9    0.34    4.08
  11   7  -9    1.93    2.58
 -11   7   9    5.56    1.54
 -10  -7   9    9.57    4.06
 -10  -7   9    9.89    4.37
 -10  -7   9   15.28    2.73
 -10   7   9    7.63    1.99
  10   7  -9   20.94    3.08
  -9  -7   9    8.30    2.65
  -9  -7   9    5.64    4.17
  -9  -7   9    8.78    3.90
  -9   7   9   11.34    2.61
   9   7  -9    8.88    2.79
  -8  -7   9    7.29    4.09
  -8  -7   9    0.91    3.69
  -8  -7   9    3.13    2.39
   8   7  -9    6.53    2.63
  -8   7   9    7.67    2.62
  -7  -7   9   20.79    4.24
  -7  -7   9   25.23    4.83
  -7  -7   9   23.06    2.98
   7   7  -9   31.05    3.38
  -7   7   9   27.78    3.23
  -6  -7   9    2.22    3.79
  -6  -7   9    1.20    2.40
   6  -7  -9    0.86    2.68
  -6   7   9    1.44    2.45
  -5  -7   9   16.01    2.83
   5  -7  -9    8.47    2.77
  -5  -7   9   11.65    4.39
  -5   7   9   13.46    3.03
  -5   7   9   10.90    2.63
  -4  -7   9    2.69    2.43
   4  -7  -9    2.27    2.60
  -4   7   9   -0.59    2.66
  -4   7   9   -0.85    2.28
   3  -7  -9    4.02    2.62
  -3  -7   9    3.93    2.68
  -3   7   9    4.93    2.49
  -3   7   9    7.46    2.92
   2  -7  -9   45.54    3.75
  -2  -7   9   39.49    3.97
   2  -7  -9   37.82    4.29
  -2   7   9   45.21    4.22
  -2   7   9   37.15    3.33
  -1  -7   9    0.35    2.90
   1  -7  -9   -1.00    3.17
   1  -7  -9   -1.22    2.50
  -1   7   9    3.45    2.53
   0  -7  -9   28.22    3.42
   0  -7  -9   20.99    4.25
   0  -7   9   35.35    4.06
   0   7   9   36.59    3.45
  -1  -7  -9   15.99    4.11
   1   7   9   20.60    3.11
  -2  -7  -9   -0.06    3.80
   2   7   9    8.16    2.81
  -3  -7  -9    0.59    4.03
   3   7   9   -2.85    2.79
  -4  -7  -9   21.07    5.03
   4   7   9   26.55    3.53
  -5  -7  -9    2.49    4.42
   5   7   9    1.80    3.00
  -6  -7  -9   19.63    5.20
   6   7   9   16.31    3.47
  -7  -7  -9   13.63    5.25
   7   7   9   11.89    3.54
  -8  -7  -9   -0.51    4.94
   8   7   9   -1.71    3.37
  -9  -7  -9    1.32    5.14
   9   7   9   -6.45    3.36
 -10  -7  -9    0.09    5.31
  10   7   9    2.81    3.80
 -11  -7  -9    5.18    5.86
  11   7   9    6.66    3.87
 -12  -7  -9    8.62    6.14
 -19  -8   9   -9.65    5.34
 -18  -8   9    3.48    5.25
 -17  -8   9   -3.28    4.67
 -16  -8   9    1.36    4.62
 -15  -8   9    2.16    4.47
 -14  -8   9    2.77    4.11
 -14   8   9    0.39    2.12
  14   8  -9    2.22    2.82
 -13  -8   9   -0.25    4.20
  13   8  -9   -1.29    2.58
 -13   8   9    1.10    2.13
 -12  -8   9    0.98    4.16
 -12   8   9    3.80    2.14
  12   8  -9   -2.33    2.50
 -12   8   9   -0.54    2.31
 -11  -8   9   24.15    4.90
 -11  -8   9   21.92    5.18
 -11   8   9   24.34    2.66
  11   8  -9   30.24    3.35
 -10  -8   9    5.62    4.04
 -10  -8   9    6.17    2.51
 -10  -8   9    1.62    4.18
  10   8  -9    4.42    2.68
 -10   8   9    3.99    1.36
  -9  -8   9    3.78    4.20
  -9  -8   9    4.75    2.45
  -9  -8   9    7.71    3.97
   9   8  -9    7.36    2.77
  -9   8   9    6.15    1.78
  -8  -8   9   33.71    4.83
  -8  -8   9   33.78    3.19
  -8  -8   9   34.23    5.36
  -8   8   9   32.39    3.25
   8   8  -9   35.44    3.53
  -7  -8   9    3.96    3.67
  -7  -8   9   -5.23    3.76
  -7  -8   9    0.35    2.33
  -7   8   9    2.10    2.53
  -6  -8   9   20.96    4.98
  -6  -8   9   32.16    3.25
  -6  -8   9   31.76    4.65
  -6   8   9   29.89    3.42
  -5  -8   9   34.81    5.38
  -5  -8   9   36.88    3.47
   5  -8  -9   27.75    3.50
  -5   8   9   31.32    3.55
  -4  -8   9    7.79    2.69
   4  -8  -9    6.41    2.82
  -4   8   9    5.62    2.90
  -4   8   9    2.70    2.45
   3  -8  -9   10.51    3.33
   3  -8  -9   11.23    2.92
  -3  -8   9   15.87    3.11
  -3   8   9   11.33    2.63
  -3   8   9   16.42    3.27
   2  -8  -9   12.11    3.49
  -2  -8   9   10.96    3.24
   2  -8  -9    9.72    2.86
  -2   8   9   11.25    2.70
  -2   8   9   12.30    3.20
   1  -8  -9   19.67    4.07
  -1  -8   9   19.43    3.54
   1  -8  -9   20.03    3.20
  -1   8   9   17.19    2.77
   0  -8  -9   13.25    2.97
   0  -8  -9    3.41    3.78
   0  -8   9   16.77    3.57
   0   8   9   11.58    2.84
  -1  -8  -9   36.55    4.91
   1   8   9   39.54    3.58
  -2  -8  -9   -0.61    3.91
   2   8   9    1.05    2.61
  -3  -8  -9    5.47    4.38
   3   8   9    8.01    2.90
  -4  -8  -9   35.69    5.44
   4   8   9   38.04    3.81
  -5  -8  -9    1.00    4.43
   5   8   9    1.15    2.98
  -6  -8  -9   -1.04    4.73
   6   8   9    2.71    2.99
  -7  -8  -9    9.07    5.16
   7   8   9    2.28    3.06
  -8  -8  -9    0.45    5.10
   8   8   9    0.56    3.23
  -9  -8  -9    9.31    5.66
   9   8   9    4.17    3.35
 -10  -8  -9    0.18    5.60
  10   8   9    2.55    3.45
 -11  -8  -9    2.81    5.84
[truncated: 236,149 more chars]
